# Supplementary material for: A genome-wide assessment of the ancestral neural crest gene regulatory network
Source: Nat Commun. 2019 Oct 16;10:4689. doi: 10.1038/s41467-019-12687-4 (PMC6795873; doi:10.1038/s41467-019-12687-4)
Supplement: Supplementary file 2 — Supplementary Dataset 1 [file 41467_2019_12687_MOESM2_ESM.xlsx]

## Sheet: DESeq2_T21vT18_downregulated
XLOC	baseMean	log2FoldChange	lfcSE	stat	pvalue	padj	geneID
XLOC_006872	268.243	-6.84002	0.415797	-16.4504	8.3349e-61	1.83423e-58	Psmc3ip
XLOC_053606	114.612	-6.14715	0.407661	-15.0791	2.22385e-51	3.8064e-49	unknown
XLOC_018767	648.996	-5.89132	0.557231	-10.5725	3.9969e-26	2.31407e-24
XLOC_008073	767.788	-5.79651	0.445161	-13.0212	9.27425e-39	9.75674e-37	NDUFA13
XLOC_067922	311.794	-5.74825	0.250172	-22.9772	7.87887e-117	8.71383e-114
XLOC_040207	297.417	-5.70346	0.348297	-16.3753	2.87255e-60	6.25766e-58	unknown
XLOC_071182	42.0104	-5.69727	0.543832	-10.4762	1.11175e-25	6.30963e-24
XLOC_023058	4902.34	-5.69287	0.188679	-30.1723	5.47611e-200	2.62446e-196	zgc110179
XLOC_023058	4902.34	-5.69287	0.188679	-30.1723	5.47611e-200	2.62446e-196	Cdx1
XLOC_043589	438.522	-5.6274	0.29766	-18.9054	1.02904e-79	3.85962e-77
XLOC_061486	29.3517	-5.61371	0.589136	-9.52871	1.59244e-21	7.03759e-20	unknown
XLOC_006470	86.1746	-5.55434	0.463853	-11.9744	4.8417e-33	3.9329e-31	shha
XLOC_048575	723.697	-5.52856	0.623478	-8.86728	7.49526e-19	2.8359e-17	unknown
XLOC_011752	111.263	-5.52427	0.485041	-11.3893	4.72763e-30	3.38732e-28	SIX3
XLOC_018835	435.71	-5.51374	0.253115	-21.7835	3.32549e-105	2.2768e-102	meox2
XLOC_040843	2063.84	-5.50132	0.244667	-22.4849	5.82761e-112	5.23671e-109	FOXC1
XLOC_036010	373.033	-5.49902	0.637047	-8.63204	6.02664e-18	2.13948e-16	tbx6
XLOC_031587	290.312	-5.38961	0.531319	-10.1438	3.52951e-24	1.80806e-22
XLOC_063580	27.7174	-5.34419	0.58173	-9.18671	4.05032e-20	1.65282e-18
XLOC_020696	383.323	-5.31389	0.308768	-17.21	2.23581e-66	5.91638e-64	CYP26A1
XLOC_042234	1062.37	-5.30207	0.440235	-12.0437	2.09303e-33	1.72947e-31	GREM1
XLOC_009428	75.3373	-5.26715	0.444369	-11.8531	2.07363e-32	1.63215e-30	lhx1
XLOC_050640	236.992	-5.19232	0.257517	-20.163	2.06895e-90	9.80659e-88
XLOC_068734	22.9896	-5.09085	0.619041	-8.22377	1.97208e-16	6.28226e-15	Gdf1
XLOC_006135	82.1252	-5.07829	0.404907	-12.5419	4.40429e-36	4.07662e-34
XLOC_062359	69.3603	-4.95611	0.435732	-11.3742	5.62167e-30	4.01456e-28
XLOC_063579	298.61	-4.95443	0.255335	-19.4037	7.18558e-84	2.92392e-81	Meox2
XLOC_063579	298.61	-4.95443	0.255335	-19.4037	7.18558e-84	2.92392e-81	meox2
XLOC_006134	96.6808	-4.91216	0.353491	-13.8961	6.68625e-44	8.50731e-42
XLOC_050600	2864.14	-4.90421	0.224175	-21.8768	4.32491e-106	3.1091e-103	wnt5b
XLOC_050600	2864.14	-4.90421	0.224175	-21.8768	4.32491e-106	3.1091e-103	LRTM2
XLOC_013493	340.701	-4.82382	0.220813	-21.8458	8.53028e-106	6.03175e-103
XLOC_006403	4967.4	-4.81557	0.354576	-13.5812	5.17595e-42	6.09985e-40	skap-epsilon
XLOC_006403	4967.4	-4.81557	0.354576	-13.5812	5.17595e-42	6.09985e-40	hox-epsilon1
XLOC_052917	27.1753	-4.81312	0.596253	-8.07228	6.8997e-16	2.10321e-14
XLOC_005443	151.286	-4.78292	0.3332	-14.3545	9.98022e-47	1.40679e-44
XLOC_034561	38.5704	-4.74954	0.58509	-8.11763	4.75371e-16	1.46354e-14	gsc
XLOC_009424	2030.81	-4.72645	0.247629	-19.0868	3.24935e-81	1.26265e-78	HNF1B
XLOC_009424	2030.81	-4.72645	0.247629	-19.0868	3.24935e-81	1.26265e-78	HNF1A
XLOC_055093	141.462	-4.71578	0.296709	-15.8936	7.01578e-57	1.39452e-54	crhr2
XLOC_023211	76.6695	-4.67177	0.439748	-10.6237	2.311e-26	1.36923e-24	Stard13
XLOC_046481	160.38	-4.64233	0.612793	-7.57569	3.57234e-14	9.47054e-13
XLOC_013491	815.14	-4.61376	0.44789	-10.3011	6.96687e-25	3.76098e-23	PRDM14
XLOC_018854	1187.51	-4.60641	0.43172	-10.6699	1.40801e-26	8.43498e-25	TWIST1
XLOC_067898	14.5203	-4.51687	0.611605	-7.38528	1.52135e-13	3.84871e-12
XLOC_056953	47.6532	-4.51354	0.543427	-8.3057	9.92332e-17	3.22792e-15
XLOC_057256	27.1225	-4.51105	0.521416	-8.65154	5.081e-18	1.81724e-16	DDB_G0285049
XLOC_013492	521.312	-4.497	0.249768	-18.0047	1.78852e-72	5.59016e-70
XLOC_033534	101.564	-4.46524	0.387784	-11.5148	1.11176e-30	8.1554e-29	LYPD6
XLOC_046231	20.2322	-4.43454	0.561754	-7.8941	2.92426e-15	8.47093e-14
XLOC_032273	29.7574	-4.38855	0.501951	-8.74299	2.27022e-18	8.29843e-17	unknown
XLOC_005121	515.026	-4.27959	0.229327	-18.6615	1.01739e-77	3.56773e-75	hox-alpha4
XLOC_025607	346.366	-4.20756	0.207921	-20.2363	4.68786e-91	2.24668e-88	ANGPTL2
XLOC_006396	88.9406	-4.1209	0.326381	-12.626	1.51734e-36	1.41968e-34	hox-epsilon8(exon2)
XLOC_006396	88.9406	-4.1209	0.326381	-12.626	1.51734e-36	1.41968e-34	hox-epsilon7
XLOC_040147	740.057	-4.11371	0.238241	-17.267	8.3376e-67	2.27611e-64	Wnt8a
XLOC_040147	740.057	-4.11371	0.238241	-17.267	8.3376e-67	2.27611e-64	sec31a
XLOC_015769	10.9267	-4.11161	0.652855	-6.2979	3.01713e-10	5.51198e-09	Uncharacterized
XLOC_021277	43.7784	-4.09453	0.450704	-9.08476	1.03931e-19	4.14312e-18
XLOC_064711	16.9028	-4.08556	0.590142	-6.923	4.42168e-12	9.77051e-11	HOXC9
XLOC_038280	13.5425	-4.07576	0.607545	-6.70857	1.96543e-11	4.06399e-10
XLOC_009186	56.646	-4.03247	0.422464	-9.54511	1.3596e-21	6.03949e-20
XLOC_048214	16.5703	-4.03237	0.582215	-6.92592	4.33157e-12	9.57631e-11
XLOC_025608	251.292	-4.03079	0.253842	-15.8792	8.83611e-57	1.74829e-54	ANGPTL2
XLOC_005174	165.414	-3.99321	0.293756	-13.5936	4.36787e-42	5.16163e-40	TNFAIP6
XLOC_033693	20.2936	-3.9843	0.604203	-6.59431	4.27231e-11	8.54324e-10	Sema5b
XLOC_039883	78.2007	-3.96213	0.44084	-8.98768	2.52494e-19	9.87383e-18
XLOC_019574	108.526	-3.94364	0.41481	-9.5071	1.96055e-21	8.58522e-20	GATA6
XLOC_010705	502.675	-3.93879	0.233702	-16.8539	9.82094e-64	2.43452e-61	FOXC1
XLOC_006845	43.9325	-3.91765	0.513564	-7.62836	2.37754e-14	6.36958e-13
XLOC_066167	34.9908	-3.91342	0.454345	-8.61332	7.09738e-18	2.50107e-16
XLOC_026423	138.174	-3.90918	0.543523	-7.19229	6.37116e-13	1.52671e-11	Foxa2
XLOC_036869	9.91463	-3.89801	0.64218	-6.06997	1.27933e-09	2.17936e-08
XLOC_004908	102.562	-3.89232	0.667992	-5.82689	5.64705e-09	8.96152e-08
XLOC_004071	9.47374	-3.88632	0.645466	-6.02095	1.73398e-09	2.91358e-08
XLOC_042564	43.1232	-3.84236	0.483733	-7.94313	1.97145e-15	5.80044e-14
XLOC_006525	95.1807	-3.83627	0.391022	-9.81089	1.01076e-22	4.83873e-21
XLOC_018609	12.3174	-3.83407	0.63484	-6.03943	1.54658e-09	2.60581e-08
XLOC_021276	26.7154	-3.83369	0.545905	-7.02263	2.17732e-12	4.96113e-11
XLOC_030270	125.741	-3.83267	0.343728	-11.1503	7.13652e-29	4.81721e-27	Ceacam1
XLOC_050836	20.6413	-3.82795	0.628509	-6.09052	1.12543e-09	1.92479e-08
XLOC_013876	12.3875	-3.80374	0.64654	-5.88322	4.02356e-09	6.49264e-08	MMP21
XLOC_002076	349.081	-3.76351	0.205336	-18.3286	4.89563e-75	1.63693e-72	EEF1A
XLOC_013874	14.1007	-3.74278	0.652449	-5.73651	9.66477e-09	1.48723e-07	MMP21
XLOC_024088	1050.23	-3.72126	0.193461	-19.2352	1.878e-82	7.57045e-80	WNT-5A
XLOC_024088	1050.23	-3.72126	0.193461	-19.2352	1.878e-82	7.57045e-80	unknown
XLOC_024088	1050.23	-3.72126	0.193461	-19.2352	1.878e-82	7.57045e-80	PLXNA2
XLOC_024088	1050.23	-3.72126	0.193461	-19.2352	1.878e-82	7.57045e-80	Plxna1
XLOC_018544	343.026	-3.7171	0.306325	-12.1345	6.93316e-34	5.84078e-32	Nrp2
XLOC_018544	343.026	-3.7171	0.306325	-12.1345	6.93316e-34	5.84078e-32	Nrp1
XLOC_040994	25.5487	-3.71062	0.542434	-6.84069	7.88152e-12	1.69468e-10
XLOC_040630	30.4244	-3.70624	0.530696	-6.98373	2.87449e-12	6.45084e-11
XLOC_062358	11.8834	-3.69395	0.602423	-6.13183	8.68738e-10	1.51216e-08
XLOC_040999	7.30841	-3.64591	0.662219	-5.5056	3.67905e-08	5.23207e-07
XLOC_019844	27.6734	-3.63668	0.472209	-7.70141	1.34575e-14	3.67846e-13
XLOC_036111	32.8952	-3.61087	0.544083	-6.63661	3.20982e-11	6.50282e-10	Smtn
XLOC_039315	51.147	-3.602	0.370464	-9.72295	2.40699e-22	1.12317e-20
XLOC_001943	118.966	-3.59795	0.670779	-5.36383	8.14755e-08	1.10339e-06	Fgf3
XLOC_045227	1416.12	-3.59055	0.181418	-19.7916	3.51569e-87	1.54737e-84
XLOC_065019	49.2592	-3.57999	0.379285	-9.43879	3.77127e-21	1.62829e-19
XLOC_005118	134.455	-3.54792	0.553007	-6.41569	1.40186e-10	2.65786e-09	hox-alpha9
XLOC_028575	192.907	-3.54075	0.552698	-6.40631	1.49087e-10	2.81302e-09	COL2A1
XLOC_004070	6.57279	-3.5347	0.664224	-5.32155	1.02889e-07	1.37142e-06
XLOC_006877	66.9671	-3.53005	0.350491	-10.0717	7.36757e-24	3.72988e-22
XLOC_027001	133.164	-3.51129	0.582519	-6.02778	1.66231e-09	2.79751e-08	fgg
XLOC_036907	29.0496	-3.51068	0.508718	-6.90103	5.16267e-12	1.13266e-10
XLOC_031060	10.3168	-3.50593	0.640816	-5.47103	4.47431e-08	6.28224e-07	SLC5A5
XLOC_009255	1687.13	-3.50187	0.124278	-28.1777	1.0969e-174	3.94273e-171	SLC8B1
XLOC_053316	703.49	-3.46635	0.19006	-18.2383	2.56496e-74	8.38139e-72	CBFA2T3
XLOC_053316	703.49	-3.46635	0.19006	-18.2383	2.56496e-74	8.38139e-72	Cbfa2t3
XLOC_050801	679.969	-3.4643	0.256653	-13.498	1.60732e-41	1.84384e-39	SMOC2
XLOC_062734	38.9137	-3.4617	0.469789	-7.36862	1.72399e-13	4.33337e-12
XLOC_021037	29.8135	-3.45111	0.512961	-6.72781	1.72231e-11	3.57897e-10
XLOC_052062	19.5223	-3.44152	0.573739	-5.99841	1.9926e-09	3.32581e-08	SLC7A9
XLOC_053670	19.1797	-3.4274	0.54308	-6.31103	2.77179e-10	5.08964e-09
XLOC_023947	473.743	-3.41952	0.461598	-7.40801	1.28213e-13	3.26266e-12	WNT7A
XLOC_053615	22.4227	-3.41076	0.514618	-6.62775	3.40848e-11	6.88608e-10
XLOC_050835	14.5293	-3.41038	0.651775	-5.23246	1.67273e-07	2.15953e-06
XLOC_023074	444.928	-3.39873	0.200076	-16.9872	1.02198e-64	2.59299e-62	TGFBI
XLOC_023074	444.928	-3.39873	0.200076	-16.9872	1.02198e-64	2.59299e-62	Tgfbi
XLOC_006243	9.57282	-3.39472	0.647752	-5.24077	1.5991e-07	2.07004e-06
XLOC_035923	137.431	-3.37561	0.262197	-12.8743	6.27861e-38	6.35717e-36
XLOC_040082	299.079	-3.3615	0.192201	-17.4896	1.72082e-68	4.88315e-66	Slc25a16
XLOC_062901	44.1448	-3.35974	0.425503	-7.89592	2.88186e-15	8.35935e-14
XLOC_063564	656.625	-3.3497	0.151934	-22.0471	1.01835e-107	7.84367e-105	unknown
XLOC_032402	13.77	-3.34293	0.562438	-5.94364	2.78759e-09	4.58221e-08	Cyp24a1
XLOC_044243	19.4276	-3.33686	0.535829	-6.22747	4.74026e-10	8.46799e-09	MYO7A
XLOC_005684	20.5653	-3.31994	0.542876	-6.11546	9.62798e-10	1.66047e-08
XLOC_017743	179.295	-3.31824	0.525886	-6.3098	2.79395e-10	5.12461e-09	Gpr125
XLOC_017743	179.295	-3.31824	0.525886	-6.3098	2.79395e-10	5.12461e-09	GPR124
XLOC_033085	47.3606	-3.31726	0.460613	-7.20185	5.94018e-13	1.42979e-11	slc44a4
XLOC_005505	62.2557	-3.30735	0.417254	-7.92646	2.25473e-15	6.59345e-14	SHH
XLOC_013920	1658.02	-3.30606	0.540835	-6.11288	9.78477e-10	1.68634e-08	SMCHD1
XLOC_005189	552.227	-3.3023	0.191701	-17.2263	1.6852e-66	4.51455e-64
XLOC_070166	54.3353	-3.28797	0.371336	-8.85443	8.41114e-19	3.17131e-17
XLOC_018348	19.2036	-3.2867	0.562177	-5.84638	5.0238e-09	8.02265e-08
XLOC_057273	124.183	-3.28322	0.337982	-9.71419	2.62315e-22	1.21792e-20
XLOC_003415	14.0835	-3.28104	0.61582	-5.32792	9.93445e-08	1.32926e-06
XLOC_020692	86.64	-3.28026	0.289115	-11.3459	7.77599e-30	5.48939e-28	emx1
XLOC_032495	9.24562	-3.27921	0.648681	-5.0552	4.29939e-07	5.26984e-06
XLOC_071849	18.7276	-3.27329	0.52012	-6.29334	3.10701e-10	5.66179e-09
XLOC_014914	222.006	-3.27256	0.226954	-14.4195	3.90145e-47	5.62814e-45	cxcl12
XLOC_027326	15.693	-3.2711	0.60553	-5.40204	6.58856e-08	9.0332e-07	CHRNA10
XLOC_042109	12.721	-3.2711	0.591712	-5.52818	3.23563e-08	4.63817e-07
XLOC_057784	16.208	-3.26503	0.581207	-5.61768	1.93541e-08	2.84817e-07
XLOC_062025	66.1129	-3.25282	0.340365	-9.55686	1.21378e-21	5.43091e-20
XLOC_003865	464.439	-3.23924	0.207925	-15.5789	1.01355e-54	1.90075e-52
XLOC_006397	27.1672	-3.23726	0.53445	-6.05719	1.3852e-09	2.35136e-08	hox-epsilon4
XLOC_052740	330.241	-3.22598	0.288838	-11.1688	5.79392e-29	3.92939e-27
XLOC_048611	10.1741	-3.22147	0.620576	-5.1911	2.0906e-07	2.6655e-06	TM4SF4
XLOC_000399	8.85135	-3.21654	0.673967	-4.77255	1.81907e-06	2.04862e-05
XLOC_035138	16.6326	-3.21591	0.537147	-5.98702	2.13716e-09	3.55504e-08	unknown
XLOC_068196	14.1801	-3.20662	0.597782	-5.36419	8.13129e-08	1.10153e-06
XLOC_067194	24.9506	-3.2054	0.496798	-6.45213	1.10288e-10	2.10582e-09
XLOC_068916	241.013	-3.19485	0.194023	-16.4664	6.39977e-61	1.43027e-58
XLOC_010359	894.993	-3.19055	0.215926	-14.7761	2.08779e-49	3.26278e-47	SCX
XLOC_005683	30.0431	-3.18407	0.443757	-7.17525	7.21745e-13	1.71995e-11
XLOC_007008	54.1335	-3.17434	0.400005	-7.93575	2.09224e-15	6.13492e-14
XLOC_050952	234.615	-3.17125	0.228148	-13.8999	6.33871e-44	8.11299e-42	ATP13A4
XLOC_005119	70.6056	-3.168	0.379508	-8.34763	6.96445e-17	2.29136e-15	Hox-alpha8
XLOC_066650	5.44897	-3.1673	0.672265	-4.71139	2.46037e-06	2.7232e-05
XLOC_003869	114.55	-3.14954	0.28807	-10.9332	7.99462e-28	5.16989e-26	pdgfa
XLOC_020499	54.4295	-3.14899	0.677222	-4.64987	3.32144e-06	3.58966e-05	unknown
XLOC_044252	116.644	-3.1475	0.276945	-11.3651	6.23959e-30	4.42575e-28	Dlg2
XLOC_000022	37.1701	-3.13867	0.447723	-7.01028	2.37837e-12	5.39076e-11
XLOC_003912	29.3129	-3.1363	0.459332	-6.82795	8.61392e-12	1.84298e-10
XLOC_060867	23.1105	-3.1154	0.603931	-5.15852	2.48903e-07	3.15207e-06	SLC7A2
XLOC_001763	89.0233	-3.11343	0.288616	-10.7875	3.94561e-27	2.42776e-25
XLOC_009429	7.92406	-3.11218	0.656039	-4.74389	2.09652e-06	2.34212e-05	lhx1
XLOC_012649	90.9982	-3.10029	0.308582	-10.0469	9.48009e-24	4.75471e-22
XLOC_006712	6.05553	-3.09979	0.662679	-4.67766	2.90163e-06	3.16771e-05
XLOC_029363	12.9604	-3.08446	0.594579	-5.18763	2.12984e-07	2.71392e-06
XLOC_021020	6.04946	-3.07469	0.675383	-4.55251	5.30085e-06	5.52942e-05
XLOC_047905	9.21683	-3.0704	0.633599	-4.84598	1.2599e-06	1.44607e-05
XLOC_021358	89.6106	-3.05989	0.6766	-4.52246	6.11255e-06	6.31655e-05	foxj1b
XLOC_011855	25.9485	-3.04066	0.600727	-5.06164	4.15661e-07	5.10208e-06	foxa2-b
XLOC_020512	137.765	-3.02419	0.338891	-8.92377	4.50671e-19	1.73971e-17	ikzf5
XLOC_060392	5.51439	-3.02006	0.675356	-4.47181	7.75598e-06	7.87705e-05
XLOC_050688	6.4221	-3.01746	0.66148	-4.56168	5.07447e-06	5.3136e-05
XLOC_004072	14.0293	-3.01186	0.645955	-4.66266	3.12155e-06	3.38367e-05
XLOC_020578	1471.21	-3.00876	0.144408	-20.8351	2.08288e-96	1.10915e-93
XLOC_042634	16.4326	-3.00744	0.549865	-5.46942	4.51511e-08	6.33746e-07	AGXT
XLOC_034426	1817.51	-2.98329	0.191191	-15.6037	6.86865e-55	1.29941e-52	Crip2
XLOC_034426	1817.51	-2.98329	0.191191	-15.6037	6.86865e-55	1.29941e-52	Crip1
XLOC_036408	7.60176	-2.97929	0.647182	-4.60349	4.15476e-06	4.41614e-05
XLOC_026327	98.9051	-2.95249	0.333502	-8.85299	8.52049e-19	3.20973e-17	RBM46
XLOC_061595	25.8692	-2.95096	0.497164	-5.93558	2.928e-09	4.79839e-08
XLOC_018608	8.82064	-2.94759	0.635794	-4.63608	3.55074e-06	3.82121e-05
XLOC_007258	8.50283	-2.9448	0.667836	-4.40947	1.03624e-05	0.000103105
XLOC_037509	17.324	-2.94226	0.510391	-5.76471	8.17995e-09	1.27285e-07
XLOC_027986	15.4275	-2.93711	0.594779	-4.93815	7.88682e-07	9.32261e-06	KBTBD12
XLOC_066906	7.70466	-2.93294	0.640498	-4.57915	4.66871e-06	4.91879e-05
XLOC_018034	257.329	-2.93069	0.230575	-12.7103	5.18132e-37	5.0109e-35
XLOC_047396	71.4855	-2.92341	0.451369	-6.47676	9.3711e-11	1.80448e-09	GRPR
XLOC_018554	54.477	-2.92274	0.422314	-6.92079	4.49128e-12	9.91606e-11
XLOC_029168	76.8552	-2.91984	0.468271	-6.23536	4.50731e-10	8.06361e-09
XLOC_011835	14.0589	-2.90493	0.630006	-4.61096	4.00814e-06	4.27082e-05	CDC42EP2
XLOC_011625	2402.1	-2.90427	0.417334	-6.9591	3.42449e-12	7.63862e-11	XPOT
XLOC_011625	2402.1	-2.90427	0.417334	-6.9591	3.42449e-12	7.63862e-11	otx5
XLOC_005682	17.0442	-2.90201	0.530085	-5.47461	4.38482e-08	6.16261e-07
XLOC_066477	26.7321	-2.89664	0.475644	-6.08993	1.12963e-09	1.9312e-08	unknown
XLOC_034435	5.34289	-2.8962	0.666525	-4.34522	1.39137e-05	0.000135901
XLOC_041001	4.79075	-2.89248	0.673126	-4.29709	1.73055e-05	0.000166244
XLOC_019499	35.1139	-2.89133	0.425236	-6.79934	1.051e-11	2.22547e-10	Ntsr1
XLOC_070283	18.9943	-2.8865	0.566788	-5.09273	3.52951e-07	4.37467e-06
XLOC_070110	16.489	-2.87614	0.544443	-5.28272	1.27281e-07	1.67378e-06	ZP3
XLOC_035083	68.9109	-2.87566	0.304408	-9.44674	3.4956e-21	1.5123e-19	Rx
XLOC_012872	66.1382	-2.86898	0.374533	-7.66016	1.85696e-14	5.0217e-13	unknown
XLOC_012872	66.1382	-2.86898	0.374533	-7.66016	1.85696e-14	5.0217e-13	CACNA2D2
XLOC_012872	66.1382	-2.86898	0.374533	-7.66016	1.85696e-14	5.0217e-13	Cacna2d1
XLOC_042661	50.6252	-2.85345	0.395091	-7.22226	5.1129e-13	1.24245e-11	ZP2
XLOC_059541	143.689	-2.85043	0.357757	-7.96753	1.61884e-15	4.79569e-14	EGFL6
XLOC_019833	11125.6	-2.84967	0.124777	-22.8382	1.91413e-115	1.90173e-112	Tgif1
XLOC_019833	11125.6	-2.84967	0.124777	-22.8382	1.91413e-115	1.90173e-112	Dlgap3
XLOC_017629	309.789	-2.84742	0.207649	-13.7127	8.52614e-43	1.03013e-40	Slc4a11
XLOC_033008	87.19	-2.84609	0.658925	-4.31929	1.56532e-05	0.00015169	BRINP1
XLOC_055188	5.4284	-2.83876	0.673512	-4.21487	2.49927e-05	0.00023369
XLOC_067195	32.3879	-2.83788	0.462775	-6.1323	8.66199e-10	1.50835e-08
XLOC_013875	5.4546	-2.8351	0.676831	-4.18878	2.80455e-05	0.000258978	MMP21
XLOC_058053	41.6351	-2.82704	0.457946	-6.1733	6.68799e-10	1.17456e-08	SSP2
XLOC_046176	11.4293	-2.82502	0.617238	-4.57687	4.71979e-06	4.96654e-05
XLOC_047906	8.22455	-2.81801	0.658468	-4.27964	1.87193e-05	0.000178791
XLOC_026326	87.3465	-2.81732	0.35887	-7.85053	4.14278e-15	1.18338e-13
XLOC_003735	11.6041	-2.80651	0.637758	-4.4006	1.07954e-05	0.000107019	unknown
XLOC_038178	992.046	-2.80578	0.208688	-13.4448	3.30098e-41	3.74687e-39	SLC10A1
XLOC_010015	11.3655	-2.80465	0.632307	-4.43558	9.18255e-06	9.22382e-05
XLOC_019394	8.15151	-2.80039	0.661483	-4.23351	2.30075e-05	0.000216205
XLOC_005247	249.54	-2.79957	0.637894	-4.38878	1.13989e-05	0.000112613	Fzd8
XLOC_005247	249.54	-2.79957	0.637894	-4.38878	1.13989e-05	0.000112613	fzd8
XLOC_019306	5.17305	-2.79943	0.673162	-4.15862	3.20172e-05	0.000292709
XLOC_062827	37.294	-2.79895	0.444007	-6.30385	2.90349e-10	5.31337e-09
XLOC_007037	4.66603	-2.79825	0.676454	-4.13665	3.52418e-05	0.000318922
XLOC_011520	19.3489	-2.79131	0.607173	-4.59723	4.28153e-06	4.54529e-05	CCDC175
XLOC_012697	31.2891	-2.78019	0.437769	-6.35083	2.14161e-10	3.98336e-09
XLOC_003529	13.7376	-2.77587	0.572221	-4.85105	1.22812e-06	1.41336e-05
XLOC_070000	19.9037	-2.77431	0.526395	-5.2704	1.36125e-07	1.78248e-06	ZP3
XLOC_010430	234.71	-2.77083	0.27123	-10.2158	1.68448e-24	8.88221e-23	unknown
XLOC_010430	234.71	-2.77083	0.27123	-10.2158	1.68448e-24	8.88221e-23	MYLK3
XLOC_011283	4.03367	-2.76656	0.676204	-4.09131	4.28938e-05	0.00038226
XLOC_006711	6.0139	-2.74591	0.676909	-4.05654	4.98052e-05	0.000437258
XLOC_017509	107.339	-2.73516	0.302278	-9.04847	1.44981e-19	5.73711e-18	HOXB1
XLOC_040997	8.62506	-2.72785	0.650203	-4.19539	2.72403e-05	0.000252462
XLOC_057785	6.92519	-2.7278	0.64786	-4.21047	2.54836e-05	0.000237781
XLOC_011354	7.83993	-2.72202	0.649183	-4.193	2.75291e-05	0.000254701
XLOC_065016	58.9433	-2.72053	0.459534	-5.92019	3.21576e-09	5.24803e-08	FTCD
XLOC_035281	4.43881	-2.71872	0.673843	-4.03465	5.46833e-05	0.0004764
XLOC_041000	5.2004	-2.70756	0.66991	-4.04167	5.30721e-05	0.000463486
XLOC_059540	33.6609	-2.70486	0.476503	-5.67649	1.3749e-08	2.06633e-07	unknown
XLOC_007908	11.6247	-2.70108	0.610255	-4.42616	9.59272e-06	9.61791e-05
XLOC_059043	78.8277	-2.69555	0.451797	-5.9663	2.42698e-09	4.02136e-08
XLOC_014951	322.214	-2.69549	0.254071	-10.6092	2.70062e-26	1.587e-24	TCF7L2
XLOC_010559	29.2975	-2.68256	0.476552	-5.62911	1.81143e-08	2.67843e-07
XLOC_021485	19.583	-2.68143	0.520021	-5.15638	2.51764e-07	3.18269e-06
XLOC_044302	710.032	-2.67006	0.383615	-6.96028	3.396e-12	7.58176e-11	NCEH1
XLOC_011863	2673.43	-2.66006	0.166045	-16.0201	9.25257e-58	1.89143e-55	Dact1
XLOC_034266	240.857	-2.65999	0.250392	-10.6233	2.32213e-26	1.37394e-24	Basp1
XLOC_040488	6.121	-2.64999	0.663958	-3.9912	6.57391e-05	0.000563947
XLOC_005120	367.238	-2.64239	0.254509	-10.3823	2.98579e-25	1.6511e-23	hox-alpha6
XLOC_005120	367.238	-2.64239	0.254509	-10.3823	2.98579e-25	1.6511e-23	hox-alpha5
XLOC_019480	40.5261	-2.63665	0.402848	-6.54503	5.94831e-11	1.16941e-09
XLOC_069594	12.8482	-2.63585	0.562818	-4.6833	2.82289e-06	3.08957e-05	HNRNPL
XLOC_012499	203.405	-2.63097	0.293126	-8.97555	2.81937e-19	1.10053e-17
XLOC_000540	46.2942	-2.62996	0.400145	-6.57251	4.9475e-11	9.82506e-10
XLOC_049633	4.01045	-2.62714	0.676441	-3.88376	0.000102851	0.000848401
XLOC_023559	4.12349	-2.62145	0.676046	-3.87761	0.000105487	0.000867981
XLOC_061493	59.4249	-2.61166	0.371941	-7.02171	2.19171e-12	4.99128e-11
XLOC_011862	275.26	-2.60877	0.187089	-13.944	3.42166e-44	4.45881e-42
XLOC_011672	17.2601	-2.60023	0.541727	-4.79989	1.58751e-06	1.79958e-05	Pdgfra
XLOC_011672	17.2601	-2.60023	0.541727	-4.79989	1.58751e-06	1.79958e-05	ARSD
XLOC_057789	5.25276	-2.59372	0.667416	-3.88622	0.000101818	0.000841162
XLOC_050599	9.16519	-2.59324	0.646691	-4.01001	6.07159e-05	0.000524611
XLOC_006952	84.8911	-2.59096	0.453001	-5.71955	1.06806e-08	1.63363e-07	FTCD
XLOC_014594	10.4443	-2.58999	0.605591	-4.2768	1.89603e-05	0.000180856
XLOC_035282	7.86795	-2.58395	0.630071	-4.10105	4.11285e-05	0.000367591
XLOC_021359	11.0668	-2.58224	0.657654	-3.92644	8.62133e-05	0.000722065	EXOC7
XLOC_021359	11.0668	-2.58224	0.657654	-3.92644	8.62133e-05	0.000722065	Exoc7
XLOC_057154	20.2808	-2.58162	0.545573	-4.73195	2.22374e-06	2.47527e-05
XLOC_053581	10.4625	-2.57814	0.612463	-4.20945	2.55988e-05	0.000238684
XLOC_010648	5.55758	-2.57417	0.656143	-3.92318	8.73883e-05	0.000730772
XLOC_028812	33.6937	-2.56883	0.44535	-5.76813	8.01562e-09	1.24836e-07
XLOC_024812	678.874	-2.56752	0.200671	-12.7947	1.75507e-37	1.74427e-35
XLOC_047665	184.969	-2.56113	0.543272	-4.71427	2.42576e-06	2.68765e-05	Has3
XLOC_028043	564.331	-2.56102	0.164962	-15.5249	2.35223e-54	4.37322e-52	Fbln2
XLOC_007057	4.34413	-2.56089	0.675599	-3.79055	0.000150312	0.00120063
XLOC_001868	15.8777	-2.55717	0.54814	-4.66518	3.0835e-06	3.34599e-05	PPFIBP2
XLOC_015033	58.8365	-2.55223	0.362295	-7.04462	1.8597e-12	4.26219e-11
XLOC_057744	1756.44	-2.55073	0.400508	-6.36872	1.90607e-10	3.56524e-09	otx2
XLOC_055426	10.1995	-2.54994	0.598573	-4.26003	2.04402e-05	0.000193811	Gbp1
XLOC_022368	5.99361	-2.54611	0.66221	-3.84488	0.000120613	0.000982515
XLOC_041567	40.2229	-2.54476	0.38326	-6.63978	3.14147e-11	6.36752e-10	Ptprd
XLOC_001991	83.1595	-2.54001	0.413742	-6.1391	8.2989e-10	1.44746e-08	unknown
XLOC_021414	278.641	-2.53957	0.223373	-11.3692	5.95357e-30	4.23755e-28
XLOC_023801	3.79517	-2.53921	0.67642	-3.7539	0.000174103	0.00137438
XLOC_045740	19.4503	-2.53685	0.543333	-4.66905	3.026e-06	3.29098e-05	GBP2
XLOC_066309	79.8796	-2.53507	0.298044	-8.50571	1.80491e-17	6.18357e-16
XLOC_053700	4.52492	-2.53108	0.671781	-3.76772	0.000164746	0.00130745
XLOC_031047	3.80087	-2.52756	0.675954	-3.73925	0.000184572	0.00144827
XLOC_028813	128.387	-2.52753	0.299813	-8.43035	3.4464e-17	1.15864e-15	hox-gamma5
XLOC_054104	6.23829	-2.52321	0.654527	-3.85502	0.000115722	0.000945698
XLOC_013821	14.734	-2.52231	0.575341	-4.38402	1.16508e-05	0.000114944
XLOC_010393	488.999	-2.52174	0.175469	-14.3714	7.82345e-47	1.10639e-44	serpina6
XLOC_018620	215.091	-2.51959	0.237793	-10.5957	3.11898e-26	1.82045e-24	LYPD6
XLOC_003290	45.5891	-2.51667	0.505536	-4.97822	6.41732e-07	7.68031e-06	SOX17
XLOC_042115	3.40556	-2.51648	0.675979	-3.72272	0.000197086	0.00153891
XLOC_067192	12.4696	-2.51412	0.612881	-4.10214	4.09347e-05	0.000366087
XLOC_006680	34.1074	-2.51166	0.513133	-4.89475	9.84306e-07	1.14901e-05	IQCA1
XLOC_018532	40847.8	-2.51093	0.10807	-23.2342	2.05426e-119	2.39477e-116	RHEB
XLOC_070542	11.6087	-2.50834	0.586692	-4.27539	1.90804e-05	0.000181917
XLOC_047565	55.2788	-2.50715	0.492483	-5.09083	3.56506e-07	4.41365e-06
XLOC_000271	10.8694	-2.50666	0.582972	-4.2998	1.70951e-05	0.000164407	unknown
XLOC_002793	15.2716	-2.50041	0.524593	-4.76639	1.87556e-06	2.10728e-05
XLOC_059884	24.0308	-2.49626	0.478055	-5.2217	1.7729e-07	2.28134e-06
XLOC_010560	25.7318	-2.49411	0.587676	-4.24401	2.19557e-05	0.000206998	pskh1
XLOC_025699	21.8438	-2.49406	0.533097	-4.67844	2.89065e-06	3.15732e-05	Ntmt1
XLOC_031195	18.4543	-2.49057	0.650628	-3.82796	0.000129211	0.00104505	OLFM4
XLOC_010382	9.76751	-2.4833	0.61394	-4.04485	5.23566e-05	0.000457516
XLOC_046825	3.42278	-2.4821	0.675655	-3.67362	0.000239139	0.00182984	unknown
XLOC_018729	43.13	-2.47967	0.468883	-5.28848	1.23339e-07	1.62492e-06
XLOC_014925	6.00356	-2.47914	0.670049	-3.69993	0.00021566	0.00166823	OIT3
XLOC_056441	10.0671	-2.47676	0.59764	-4.14423	3.40957e-05	0.00030948
XLOC_028587	28.8134	-2.47009	0.504658	-4.89458	9.85153e-07	1.14969e-05	ZNF385D
XLOC_015034	11.7874	-2.46582	0.625586	-3.94162	8.09343e-05	0.000681558
XLOC_058260	25.1599	-2.45258	0.457037	-5.36627	8.03799e-08	1.08957e-06	BOLL
XLOC_024811	258.708	-2.45158	0.326436	-7.51016	5.90541e-14	1.53908e-12	unknown
XLOC_024811	258.708	-2.45158	0.326436	-7.51016	5.90541e-14	1.53908e-12	Rnf220
XLOC_050758	6.04814	-2.4513	0.656537	-3.73368	0.000188699	0.0014785	unknown
XLOC_028567	64.8805	-2.45072	0.387852	-6.3187	2.63778e-10	4.8539e-09	MYL4
XLOC_057296	10.3619	-2.44952	0.67358	-3.63656	0.000276299	0.00208605
XLOC_027102	125.939	-2.44685	0.268368	-9.11752	7.68623e-20	3.08975e-18	Shisa2
XLOC_067426	4.1274	-2.44424	0.67408	-3.62604	0.000287806	0.00216133
XLOC_027032	1193.44	-2.4434	0.157745	-15.4895	4.08316e-54	7.52645e-52	pdgfra
XLOC_065665	55.1984	-2.44198	0.425096	-5.74454	9.21735e-09	1.42372e-07
XLOC_057790	6.6215	-2.44133	0.653398	-3.73636	0.000186704	0.00146393
XLOC_008449	525.739	-2.43875	0.155816	-15.6515	3.24505e-55	6.19331e-53	FOXB1
XLOC_045790	5.43732	-2.43341	0.659196	-3.69148	0.000222957	0.0017182	HTR1B
XLOC_007038	3.88684	-2.43132	0.676342	-3.5948	0.000324635	0.00240758
XLOC_031041	28.6272	-2.4311	0.550634	-4.4151	1.00961e-05	0.000100572	WFDC3
XLOC_050235	42.708	-2.43079	0.409857	-5.93084	3.01395e-09	4.93361e-08
XLOC_023346	25.7912	-2.42992	0.559198	-4.34536	1.39048e-05	0.000135845	SLC25A4
XLOC_004062	3.8184	-2.42948	0.676441	-3.59156	0.000328705	0.00243149
XLOC_015731	1073	-2.42021	0.141174	-17.1435	7.02641e-66	1.82572e-63	IDH3A
XLOC_070167	22.741	-2.41684	0.46966	-5.14594	2.66184e-07	3.35417e-06
XLOC_042671	4.29957	-2.40515	0.676803	-3.55369	0.000379863	0.0027733
XLOC_011355	6.12119	-2.40076	0.650545	-3.69039	0.000223914	0.00172435
XLOC_025683	195.386	-2.40036	0.246778	-9.72678	2.31825e-22	1.08335e-20	col-99
XLOC_052242	453.33	-2.39899	0.196844	-12.1873	3.63227e-34	3.10854e-32
XLOC_028641	213.97	-2.39774	0.314044	-7.63503	2.25767e-14	6.05974e-13	unknown
XLOC_006310	12.7533	-2.39765	0.599357	-4.00038	6.3241e-05	0.000544032
XLOC_050333	119.177	-2.39675	0.287979	-8.32263	8.60309e-17	2.80482e-15
XLOC_031307	8.57067	-2.39483	0.648786	-3.69124	0.000223162	0.00171948
XLOC_030622	3.06511	-2.38885	0.674839	-3.53988	0.000400305	0.00290875
XLOC_035514	105.859	-2.38713	0.356115	-6.70326	2.03823e-11	4.20042e-10
XLOC_034339	53.6493	-2.3827	0.380916	-6.2552	3.97002e-10	7.16181e-09	OTOR
XLOC_038158	303.338	-2.38151	0.237385	-10.0323	1.09956e-23	5.50199e-22	MAP1LC3C
XLOC_024813	210.349	-2.38032	0.292727	-8.13153	4.23917e-16	1.31262e-14	Rnf220
XLOC_068449	47.3005	-2.37986	0.377369	-6.30644	2.85519e-10	5.22942e-09	DMBT1
XLOC_037284	9.4305	-2.37739	0.610884	-3.89173	9.95335e-05	0.000824343
XLOC_021566	3.00187	-2.36837	0.674672	-3.51041	0.000447423	0.00321913	CACNG2
XLOC_001316	4.79046	-2.36716	0.662882	-3.57101	0.000355604	0.00261299
XLOC_011694	5.41785	-2.36514	0.671132	-3.5241	0.000424917	0.00307361	ESR2
XLOC_021816	3.81199	-2.3631	0.676247	-3.49444	0.000475058	0.003397
XLOC_019716	64.5432	-2.36055	0.334961	-7.04724	1.82502e-12	4.18938e-11	ST6GAL1
XLOC_016623	18.5097	-2.3597	0.597208	-3.95122	7.77539e-05	0.000656698	ZP4
XLOC_016623	18.5097	-2.3597	0.597208	-3.95122	7.77539e-05	0.000656698	ERGIC2
XLOC_019709	28.8864	-2.35737	0.533914	-4.41525	1.00891e-05	0.000100525
XLOC_065785	103.639	-2.3564	0.262943	-8.96165	3.19867e-19	1.24632e-17
XLOC_039005	3.91782	-2.35513	0.676272	-3.48253	0.000496706	0.0035348
XLOC_033725	17.2535	-2.3544	0.563104	-4.1811	2.90097e-05	0.000267195
XLOC_055363	13.3423	-2.35371	0.645249	-3.64776	0.000264535	0.00200636
XLOC_060609	13.8315	-2.3508	0.541251	-4.34327	1.4038e-05	0.000137053
XLOC_051677	34.5134	-2.34645	0.4316	-5.43662	5.43013e-08	7.52869e-07	unknown
XLOC_040682	9.26891	-2.34583	0.647221	-3.62446	0.000289563	0.00217326
XLOC_026179	81.0405	-2.344	0.335803	-6.98029	2.94576e-12	6.60393e-11	P65-A
XLOC_067193	3.67076	-2.34369	0.675075	-3.47174	0.000517095	0.00366719
XLOC_006404	10.2814	-2.34284	0.584411	-4.00889	6.1005e-05	0.000526687
XLOC_054904	194.447	-2.34275	0.238141	-9.83767	7.74824e-23	3.72166e-21	unknown
XLOC_054554	7.48708	-2.3397	0.656262	-3.56518	0.000363603	0.00266451
XLOC_036123	9.7922	-2.33909	0.643718	-3.63372	0.00027936	0.00210547
XLOC_061967	3.01038	-2.33847	0.674014	-3.46947	0.000521485	0.00369286
XLOC_037398	74.9461	-2.33474	0.352295	-6.62724	3.42015e-11	6.90643e-10	Col9a1
XLOC_070329	7.66616	-2.33302	0.627727	-3.71661	0.000201911	0.00157231
XLOC_037337	10.6036	-2.33164	0.634449	-3.67506	0.000237792	0.00182115
XLOC_059072	23.7276	-2.32924	0.568329	-4.0984	4.16014e-05	0.000371357	Ddr1
XLOC_018810	974.647	-2.32896	0.251193	-9.27157	1.83424e-20	7.6441e-19	tut1
XLOC_053692	3.27843	-2.32401	0.676117	-3.43729	0.000587571	0.00409099
XLOC_038217	12.1101	-2.32221	0.585718	-3.96472	7.34817e-05	0.00062416
XLOC_020768	239.683	-2.31095	0.240985	-9.5896	8.84236e-22	3.98534e-20
XLOC_002792	18.3684	-2.30439	0.570142	-4.04179	5.30451e-05	0.000463345
XLOC_065715	80.272	-2.30361	0.277982	-8.28691	1.16231e-16	3.76382e-15
XLOC_035515	19.2664	-2.30007	0.535371	-4.29622	1.73735e-05	0.000166861
XLOC_006130	3.02901	-2.29882	0.673448	-3.41351	0.000641324	0.00441888
XLOC_003917	9.54729	-2.29649	0.605955	-3.78987	0.000150724	0.0012037
XLOC_019866	20.2973	-2.29438	0.534295	-4.29423	1.75301e-05	0.000168214
XLOC_033528	18.1047	-2.2862	0.516612	-4.42538	9.6274e-06	9.6482e-05	PDIA5
XLOC_057320	7.0231	-2.28373	0.621474	-3.6747	0.000238129	0.00182308
XLOC_019502	24.7181	-2.28274	0.459299	-4.97006	6.6931e-07	7.98599e-06
XLOC_006245	3.04623	-2.28147	0.673025	-3.38987	0.000699259	0.00477611
XLOC_047809	8295.62	-2.27915	0.12143	-18.7693	1.34664e-78	4.88107e-76	TRIM71
XLOC_052318	8.90155	-2.27912	0.622015	-3.6641	0.000248213	0.00189389
XLOC_011673	20.9682	-2.27709	0.554602	-4.10581	4.02895e-05	0.000360765	Pdgfra
XLOC_011673	20.9682	-2.27709	0.554602	-4.10581	4.02895e-05	0.000360765	ARSD
XLOC_040998	3.18147	-2.27702	0.676788	-3.36444	0.000766984	0.00517801
XLOC_064461	12.0162	-2.27487	0.609463	-3.73259	0.000189522	0.00148414	C1qtnf2
XLOC_061703	52.5992	-2.27307	0.422664	-5.37797	7.53289e-08	1.02465e-06
XLOC_021435	15.7178	-2.27221	0.573906	-3.9592	7.52005e-05	0.000636878	SSTR5
XLOC_000147	4615.91	-2.27146	0.127881	-17.7624	1.38311e-70	4.14291e-68	RNASEH1
XLOC_065714	27.7942	-2.26732	0.435238	-5.20938	1.8947e-07	2.42721e-06
XLOC_064876	131.747	-2.26467	0.250595	-9.0372	1.60737e-19	6.34317e-18
XLOC_070327	16.9687	-2.25384	0.530937	-4.24503	2.1856e-05	0.000206193
XLOC_057034	3.13665	-2.25311	0.67674	-3.32936	0.000870452	0.00579312
XLOC_003252	181.069	-2.25286	0.669062	-3.3672	0.000759368	0.00513383	odf3
XLOC_050127	4.79831	-2.24894	0.66727	-3.37036	0.0007507	0.00508479
XLOC_046077	2.92577	-2.24756	0.672474	-3.34223	0.000831068	0.0055619
XLOC_032868	6.10085	-2.24316	0.676186	-3.31737	0.000908695	0.00601792
XLOC_026181	193.207	-2.23797	0.313546	-7.1376	9.4977e-13	2.23983e-11	FMN2
XLOC_023500	3.06286	-2.23672	0.676672	-3.30547	0.000948164	0.00625148
XLOC_034473	392.575	-2.23583	0.248155	-9.00979	2.06448e-19	8.10994e-18	Actin%2C
XLOC_052421	917.817	-2.23548	0.159366	-14.0274	1.06025e-44	1.39427e-42
XLOC_013497	3.06901	-2.2342	0.67186	-3.3254	0.000882928	0.00586439
XLOC_053713	9.52397	-2.22866	0.619126	-3.59969	0.000318599	0.00236688
XLOC_049817	8.0555	-2.22653	0.617833	-3.60377	0.000313638	0.00233445
XLOC_049634	7.30829	-2.22337	0.645709	-3.4433	0.000574662	0.00401457	GUCA1A
XLOC_006244	2.81317	-2.22304	0.671891	-3.30864	0.000937516	0.00618979
XLOC_037520	797.823	-2.22245	0.166717	-13.3306	1.53559e-40	1.72038e-38	rspo2
XLOC_018035	6.89353	-2.22117	0.656895	-3.38132	0.00072139	0.00490737
XLOC_002062	157.104	-2.22073	0.301245	-7.37185	1.68276e-13	4.2347e-12	COL21A1
XLOC_002126	10.5367	-2.21541	0.598928	-3.69897	0.000216477	0.00167305
XLOC_029669	292.863	-2.21425	0.190687	-11.6119	3.58434e-31	2.6748e-29	unknown
XLOC_029669	292.863	-2.21425	0.190687	-11.6119	3.58434e-31	2.6748e-29	LD
XLOC_006734	10.1067	-2.21424	0.575558	-3.84712	0.000119516	0.000974308
XLOC_019919	2.67495	-2.21239	0.671986	-3.29231	0.000993669	0.00652259
XLOC_046171	5.32279	-2.20823	0.662961	-3.33086	0.000865787	0.00576741
XLOC_053661	3.0585	-2.20744	0.676382	-3.2636	0.00110006	0.00714054
XLOC_022367	288.53	-2.2069	0.243415	-9.06642	1.22993e-19	4.88947e-18	Rrbp1
XLOC_022367	288.53	-2.2069	0.243415	-9.06642	1.22993e-19	4.88947e-18	Gse1
XLOC_046344	42.822	-2.20587	0.677569	-3.25556	0.0011317	0.0073129
XLOC_000198	16.3788	-2.20089	0.523681	-4.20273	2.63711e-05	0.00024509
XLOC_070928	26.4197	-2.19827	0.54833	-4.00903	6.09695e-05	0.000526579
XLOC_007176	19.983	-2.19529	0.537784	-4.0821	4.46304e-05	0.000396262
XLOC_000021	7.90971	-2.19369	0.632581	-3.46784	0.000524665	0.00371161
XLOC_001563	44.573	-2.19336	0.440553	-4.97865	6.40295e-07	7.66737e-06
XLOC_063591	12.3664	-2.1919	0.640692	-3.42114	0.000623583	0.00431424
XLOC_031306	3.2907	-2.19129	0.675586	-3.24354	0.00118054	0.00758535
XLOC_009238	395.036	-2.19006	0.430237	-5.09036	3.57393e-07	4.42209e-06	Abcb9
XLOC_001517	4.5663	-2.18626	0.671813	-3.25427	0.00113684	0.00733729
XLOC_042436	2.82069	-2.18518	0.670984	-3.25669	0.00112721	0.00729151
XLOC_028022	41.7447	-2.18364	0.508555	-4.29382	1.75626e-05	0.000168415	GP1
XLOC_059906	10.1743	-2.18026	0.588809	-3.70284	0.000213203	0.0016513
XLOC_058290	6.02539	-2.17955	0.673242	-3.2374	0.00120625	0.00773553
XLOC_036774	3278.43	-2.17834	0.109149	-19.9575	1.29132e-88	5.98909e-86
XLOC_022799	13.9777	-2.17736	0.576248	-3.77852	0.000157764	0.00125597
XLOC_007054	3.62083	-2.17719	0.676654	-3.21758	0.00129279	0.00822812
XLOC_018833	4.36941	-2.1765	0.668875	-3.25396	0.00113807	0.00734414	Dgkb
XLOC_044379	3.73552	-2.17601	0.675228	-3.22263	0.00127018	0.00809853
XLOC_006352	2.82374	-2.17355	0.670656	-3.24094	0.00119138	0.00764927
XLOC_059544	5.37588	-2.17225	0.666813	-3.25767	0.00112332	0.00726967	ABCC2
XLOC_059544	5.37588	-2.17225	0.666813	-3.25767	0.00112332	0.00726967	ABCC1
XLOC_060242	5.94707	-2.17192	0.645469	-3.36487	0.000765792	0.00517077
XLOC_007007	16.5624	-2.17137	0.539956	-4.02137	5.78604e-05	0.000502151
XLOC_015452	7.69763	-2.16701	0.662942	-3.26878	0.00108013	0.00702387
XLOC_031193	3.67872	-2.16297	0.676399	-3.19777	0.00138496	0.00874637	unknown
XLOC_003755	41.8967	-2.16287	0.666881	-3.24327	0.00118167	0.00759144	unknown
XLOC_041569	8.814	-2.16071	0.62262	-3.47036	0.00051977	0.00368314	PTPRF
XLOC_022369	659.882	-2.15856	0.175403	-12.3063	8.38097e-35	7.37748e-33	Gse1
XLOC_008108	6.28945	-2.15579	0.658151	-3.27553	0.00105464	0.00687499
XLOC_006715	5.99535	-2.15239	0.64366	-3.34398	0.000825852	0.00553387
XLOC_023245	80.9183	-2.15221	0.410664	-5.2408	1.5988e-07	2.07004e-06	KDR
XLOC_023499	2.68161	-2.15093	0.66985	-3.21106	0.00132246	0.00839216
XLOC_018218	3.61809	-2.14977	0.677188	-3.17455	0.00150071	0.00939476
XLOC_017999	6.48322	-2.14426	0.628422	-3.41213	0.000644565	0.0044398
XLOC_006395	3.64797	-2.14265	0.675506	-3.17192	0.00151435	0.0094702	hox-epsilon8(exon1-2)
XLOC_007777	4.76635	-2.14135	0.666763	-3.21157	0.00132012	0.00837899
XLOC_047856	19.7022	-2.1411	0.456912	-4.68602	2.78562e-06	3.05188e-05	DMBT1
XLOC_027795	50.2003	-2.13467	0.363246	-5.87664	4.18675e-09	6.74336e-08	SLC16A1
XLOC_027795	50.2003	-2.13467	0.363246	-5.87664	4.18675e-09	6.74336e-08	ASL
XLOC_036193	139.082	-2.13462	0.298048	-7.16198	7.95203e-13	1.89082e-11	cdh4
XLOC_020011	3.71452	-2.13297	0.676324	-3.15377	0.00161175	0.009987
XLOC_007055	2.54162	-2.13033	0.670018	-3.17951	0.00147526	0.00925291
XLOC_036693	2.66829	-2.12461	0.669564	-3.17313	0.00150806	0.00943671
XLOC_059428	156.849	-2.12431	0.223064	-9.52335	1.67687e-21	7.38801e-20	unknown
XLOC_035092	1035.82	-2.12309	0.155119	-13.6868	1.2175e-42	1.45469e-40
XLOC_050654	24.4956	-2.12271	0.447088	-4.74785	2.05588e-06	2.29791e-05	unknown
XLOC_030906	12.9992	-2.12184	0.539147	-3.93555	8.30075e-05	0.000697247
XLOC_064523	28.0769	-2.1197	0.441776	-4.79813	1.60157e-06	1.81504e-05
XLOC_009035	2.8626	-2.11906	0.67578	-3.13572	0.00171431	0.0105482
XLOC_040578	3.78809	-2.11605	0.677262	-3.12442	0.00178155	0.0109029
XLOC_027008	2650.17	-2.11451	0.173196	-12.2087	2.79172e-34	2.39871e-32	tdo2b
XLOC_030729	54.2139	-2.11359	0.66713	-3.16819	0.00153392	0.00956107
XLOC_001895	18.3754	-2.11254	0.496308	-4.2565	2.07648e-05	0.000196673	GUCA1B
XLOC_057255	2.73937	-2.10798	0.668255	-3.15445	0.001608	0.00996806
XLOC_062083	100.862	-2.10766	0.255826	-8.23866	1.74154e-16	5.57126e-15
XLOC_026229	2100.38	-2.10544	0.12706	-16.5704	1.14055e-61	2.63077e-59	EML1
XLOC_053718	8.82148	-2.10416	0.60806	-3.46045	0.00053927	0.00380007
XLOC_053678	5.21443	-2.10164	0.657281	-3.19747	0.00138639	0.00875411
XLOC_016541	12.7558	-2.10153	0.651843	-3.22398	0.00126423	0.0080666
XLOC_062623	28.2744	-2.09885	0.447671	-4.68839	2.75368e-06	3.01918e-05
XLOC_059535	5.18074	-2.09742	0.668211	-3.13886	0.00169604	0.0104493	ABCC2
XLOC_059535	5.18074	-2.09742	0.668211	-3.13886	0.00169604	0.0104493	ABCC1
XLOC_039912	4.94453	-2.09495	0.660874	-3.16997	0.00152453	0.00951489
XLOC_026541	18.4421	-2.09335	0.546337	-3.8316	0.000127312	0.00103143
XLOC_061543	86.2704	-2.09329	0.303411	-6.89919	5.23005e-12	1.14512e-10	Boll
XLOC_016663	5.1808	-2.09323	0.666196	-3.14207	0.00167759	0.0103504
XLOC_051180	26891	-2.0915	0.1548	-13.511	1.34631e-41	1.56103e-39
XLOC_054934	12.1618	-2.09008	0.577577	-3.61871	0.00029608	0.00221607	top1
XLOC_046872	19.2146	-2.08792	0.468217	-4.45931	8.22249e-06	8.32732e-05	DPYS
XLOC_046872	19.2146	-2.08792	0.468217	-4.45931	8.22249e-06	8.32732e-05	CHRAC1
XLOC_020697	4.39404	-2.0877	0.670456	-3.11385	0.00184665	0.0112466
XLOC_067249	6.804	-2.08471	0.633456	-3.29101	0.00099827	0.00654781
XLOC_057791	94.3941	-2.08177	0.582532	-3.57365	0.000352035	0.00259008
XLOC_045789	2.97323	-2.08162	0.674838	-3.08462	0.0020381	0.0122899
XLOC_040259	3.14166	-2.08124	0.676735	-3.07542	0.00210207	0.0126209
XLOC_066567	4.1348	-2.08114	0.675348	-3.08158	0.00205904	0.0123919
XLOC_021055	3.18295	-2.08103	0.676511	-3.07612	0.00209714	0.0125983
XLOC_061528	3.94647	-2.07903	0.677254	-3.06979	0.00214206	0.0128467
XLOC_038842	23.0171	-2.07835	0.590764	-3.51807	0.000434696	0.00313751	HAL
XLOC_054833	9.92647	-2.07809	0.597951	-3.47535	0.000510186	0.00362415	unknown
XLOC_010663	49.0309	-2.07748	0.370662	-5.60478	2.08524e-08	3.06136e-07	unknown
XLOC_044805	39.1254	-2.07641	0.396065	-5.24259	1.58341e-07	2.05344e-06	ODF3
XLOC_057787	20.1588	-2.07536	0.547678	-3.78939	0.000151019	0.00120561
XLOC_061047	20371.7	-2.07387	0.0986183	-21.0292	3.54268e-98	2.01061e-95	Huwe1
XLOC_053300	3.78268	-2.07208	0.676081	-3.06485	0.00217781	0.013034
XLOC_030876	40.897	-2.0714	0.362356	-5.71647	1.08757e-08	1.65935e-07
XLOC_060260	6.79493	-2.07041	0.669878	-3.09073	0.00199667	0.0120721
XLOC_051056	4.09047	-2.06222	0.676859	-3.04675	0.00231328	0.0137436
XLOC_038181	176.722	-2.06093	0.499042	-4.12977	3.63125e-05	0.000327877	unknown
XLOC_052420	2117.65	-2.06077	0.169233	-12.1771	4.11592e-34	3.50161e-32	MEX3A
XLOC_057604	3.19328	-2.06006	0.676508	-3.04515	0.00232567	0.013802
XLOC_040774	6.22563	-2.05997	0.642112	-3.20812	0.00133603	0.00846712
XLOC_002271	40.3068	-2.05981	0.447431	-4.60364	4.15171e-06	4.41508e-05
XLOC_024421	2.96382	-2.05966	0.675348	-3.04977	0.00229014	0.0136324
XLOC_055025	7.28852	-2.05619	0.640948	-3.20804	0.00133644	0.00846846
XLOC_010014	22.57	-2.05457	0.573913	-3.57994	0.000343673	0.00253352
XLOC_024268	5.10107	-2.05373	0.676949	-3.03381	0.00241488	0.0142491
XLOC_064466	4.69534	-2.05185	0.66291	-3.09521	0.00196674	0.0119028	TLE4
XLOC_027327	2.61661	-2.05116	0.666908	-3.07563	0.00210057	0.0126152	CHRNA10
XLOC_063025	7.96205	-2.04914	0.639597	-3.2038	0.00135626	0.00858775
XLOC_063026	11.4435	-2.04707	0.560743	-3.65065	0.00026158	0.00198604
XLOC_057837	5.19319	-2.04632	0.66517	-3.07639	0.00209523	0.0125886
XLOC_026180	37.4277	-2.04607	0.363087	-5.6352	1.74852e-08	2.59261e-07	P65-A
XLOC_045081	36.5386	-2.04577	0.447409	-4.57248	4.81991e-06	5.06449e-05	skap
XLOC_000003	68.0418	-2.0456	0.302009	-6.77333	1.25854e-11	2.64804e-10	SLC6A19
XLOC_027652	6.21152	-2.04426	0.643438	-3.17709	0.00148763	0.00932376
XLOC_064405	17.5684	-2.0428	0.643221	-3.17589	0.0014938	0.0093583
XLOC_045217	7.4987	-2.0425	0.619401	-3.29754	0.000975358	0.00641574
XLOC_009219	6.99965	-2.0406	0.67778	-3.01071	0.00260641	0.0152107	Slc5a1
XLOC_020470	7.52805	-2.04039	0.638747	-3.19436	0.0014014	0.00883206
XLOC_044139	31.3341	-2.03791	0.53435	-3.81382	0.000136834	0.00110154	ARRB1
XLOC_044253	4.85919	-2.03775	0.67011	-3.04092	0.0023586	0.0139763	Dlg2
XLOC_008420	3.50694	-2.03739	0.676909	-3.00985	0.00261377	0.0152454
XLOC_056047	890.023	-2.03715	0.143532	-14.193	1.01244e-45	1.37326e-43	Dhcr7
XLOC_015669	78.6231	-2.037	0.303769	-6.70576	2.00355e-11	4.13488e-10
XLOC_036338	5.48298	-2.03532	0.664803	-3.06154	0.00220202	0.0131605
XLOC_036708	60.8744	-2.03469	0.31174	-6.52688	6.71531e-11	1.31183e-09	CHDC2
XLOC_056048	1977.58	-2.03403	0.139755	-14.5543	5.48384e-48	8.15637e-46
XLOC_001317	4.69075	-2.03373	0.66994	-3.03569	0.00239986	0.0141748
XLOC_018553	5.61487	-2.03186	0.652882	-3.11214	0.00185735	0.0113058	hox-beta5
XLOC_035740	25.2767	-2.031	0.469797	-4.32314	1.53822e-05	0.000149332
XLOC_018642	970.869	-2.03017	0.193463	-10.4938	9.21999e-26	5.24651e-24	RECK
XLOC_059998	16.2238	-2.02985	0.589252	-3.4448	0.000571491	0.00399889
XLOC_000324	2226.65	-2.02795	0.157712	-12.8585	7.7027e-38	7.76263e-36	Prdm1
XLOC_040218	2.90956	-2.02754	0.670832	-3.02242	0.00250761	0.0147098
XLOC_044171	54.654	-2.02503	0.458698	-4.41474	1.01134e-05	0.00010072
XLOC_010013	24.1427	-2.02138	0.498152	-4.05776	4.95456e-05	0.000435156
XLOC_011706	4.23173	-2.02097	0.672572	-3.00483	0.00265726	0.0154623
XLOC_044244	3.6731	-2.02056	0.677058	-2.98432	0.00284211	0.0164108	MYO7A
XLOC_070155	3.61518	-2.01974	0.676472	-2.9857	0.0028293	0.0163412	DTX1
XLOC_020530	61.656	-2.0185	0.443927	-4.54692	5.44357e-06	5.6605e-05
XLOC_031058	2.32709	-2.01756	0.666285	-3.02808	0.00246113	0.0144798	SLC5A5
XLOC_017729	405.434	-2.01677	0.203218	-9.92418	3.26767e-23	1.5962e-21	unknown
XLOC_046173	7.60688	-2.01057	0.661577	-3.03906	0.00237315	0.0140435
XLOC_070078	48.933	-2.00836	0.364983	-5.5026	3.74225e-08	5.31319e-07
XLOC_049965	17.7814	-2.00818	0.612184	-3.28035	0.00103678	0.00677594
XLOC_054172	7.15957	-2.00784	0.653915	-3.0705	0.00213704	0.0128196
XLOC_062069	8.03458	-2.00702	0.661659	-3.03331	0.00241884	0.0142705	ZP4
XLOC_003748	13.4039	-2.0034	0.547724	-3.65769	0.000254496	0.0019384	hpx
XLOC_040577	3.86391	-2.00229	0.675731	-2.96315	0.0030451	0.0173937
XLOC_062749	3.50374	-2.00195	0.676234	-2.96044	0.00307201	0.0175202
XLOC_012542	2.32524	-2.00107	0.665502	-3.00686	0.00263964	0.0153773
XLOC_054231	3.42019	-2.00032	0.677344	-2.95318	0.0031452	0.0178903
XLOC_021283	5.2733	-2.00002	0.677197	-2.95339	0.00314306	0.0178828
XLOC_036212	2.85949	-1.99972	0.671114	-2.9797	0.00288526	0.0166288
XLOC_054089	26.2088	-1.9979	0.436869	-4.57322	4.80283e-06	5.049e-05	ZP3
XLOC_010584	113.913	-1.99769	0.366042	-5.45754	4.82773e-08	6.74553e-07
XLOC_053417	4.60447	-1.99621	0.668744	-2.98501	0.00283572	0.0163761	ZP3
XLOC_021571	11.7877	-1.99578	0.586049	-3.40549	0.000660456	0.00453622	RBFOX3
XLOC_021571	11.7877	-1.99578	0.586049	-3.40549	0.000660456	0.00453622	RBFOX1
XLOC_024650	25.0766	-1.99198	0.500507	-3.97993	6.89357e-05	0.000589026	FAM183A
XLOC_056300	13.7924	-1.98925	0.515135	-3.86161	0.000112644	0.000921426
XLOC_021072	5.27901	-1.98841	0.670493	-2.96559	0.00302099	0.0172772
XLOC_057788	7.97903	-1.98732	0.614927	-3.23179	0.00123017	0.0078667
XLOC_008363	2426.56	-1.98668	0.147439	-13.4746	2.2074e-41	2.52551e-39	Zfand5
XLOC_032966	39.7669	-1.98627	0.419748	-4.73206	2.22252e-06	2.47455e-05	OLFML2B
XLOC_027099	926.865	-1.98302	0.214302	-9.25337	2.17528e-20	9.00445e-19	Basp1
XLOC_044621	98.6357	-1.98277	0.283013	-7.00593	2.45359e-12	5.5496e-11	LOX
XLOC_071808	8.21631	-1.98251	0.63982	-3.09855	0.00194472	0.0117861
XLOC_021557	8.53464	-1.98212	0.599393	-3.30688	0.000943427	0.006225	RPL3L
XLOC_021557	8.53464	-1.98212	0.599393	-3.30688	0.000943427	0.006225	RPL3
XLOC_052322	21.2545	-1.97986	0.468982	-4.22162	2.42556e-05	0.000227142
XLOC_032967	290.048	-1.9791	0.256844	-7.70546	1.3037e-14	3.57033e-13	OLFML2B
XLOC_012620	44.4967	-1.97701	0.382917	-5.16302	2.42999e-07	3.08001e-06	wnt5b
XLOC_046175	8.9763	-1.97699	0.625702	-3.15964	0.00157963	0.00981622
XLOC_020509	9479.7	-1.97659	0.175621	-11.2548	2.19212e-29	1.5177e-27	SFRP5
XLOC_020509	9479.7	-1.97659	0.175621	-11.2548	2.19212e-29	1.5177e-27	SFRP1
XLOC_070955	7.27286	-1.97567	0.667306	-2.96066	0.0030698	0.0175099
XLOC_045675	6.22141	-1.97496	0.647947	-3.04803	0.00230347	0.0136985
XLOC_020912	3.69018	-1.97475	0.677341	-2.91544	0.00355185	0.0198937
XLOC_000223	222.373	-1.97255	0.245276	-8.04218	8.82512e-16	2.67126e-14
XLOC_004800	10.84	-1.97115	0.623096	-3.16347	0.00155899	0.00970611
XLOC_038116	126.12	-1.96952	0.273104	-7.21161	5.52953e-13	1.33766e-11	Phyhd1
XLOC_038116	126.12	-1.96952	0.273104	-7.21161	5.52953e-13	1.33766e-11	phyhd1
XLOC_003277	8.889	-1.96939	0.655411	-3.00482	0.0026574	0.0154623
XLOC_052325	27.3254	-1.96825	0.41909	-4.69649	2.6467e-06	2.91076e-05
XLOC_017595	14.7669	-1.96706	0.513565	-3.83021	0.000128036	0.00103652	ZP4
XLOC_027007	3.9367	-1.96449	0.677176	-2.901	0.00371973	0.020705	Lect2
XLOC_006259	8.33156	-1.96441	0.638439	-3.07689	0.00209172	0.0125693
XLOC_038001	4785.8	-1.96321	0.134342	-14.6135	2.30446e-48	3.47546e-46	Aspg
XLOC_047125	4.40604	-1.96116	0.671477	-2.92067	0.00349278	0.0195986	ndufaf3
XLOC_000560	118.64	-1.95438	0.350938	-5.56902	2.56171e-08	3.72537e-07	U88
XLOC_028799	9.13396	-1.95225	0.652589	-2.99155	0.00277568	0.0160616	slc48a1-b
XLOC_004081	7.08281	-1.95067	0.67646	-2.88364	0.00393105	0.0216993
XLOC_058473	2.28294	-1.95035	0.663708	-2.93857	0.00329728	0.0186227
XLOC_026418	3.33362	-1.94999	0.671233	-2.90508	0.00367156	0.0204606	NKX2-1
XLOC_044832	20.516	-1.94964	0.445033	-4.38088	1.18199e-05	0.000116479
XLOC_014590	5.49749	-1.94863	0.656044	-2.97027	0.00297539	0.0170618
XLOC_024031	9.90239	-1.94618	0.619636	-3.14085	0.00168461	0.0103892
XLOC_055042	3.7929	-1.94415	0.675229	-2.87924	0.00398638	0.0219569
XLOC_032359	25.3717	-1.94348	0.525671	-3.69715	0.000218037	0.0016839	SALL1
XLOC_025450	5.81002	-1.94038	0.673088	-2.88281	0.00394149	0.0217513	Klhl31
XLOC_021056	5.05732	-1.94031	0.676002	-2.87027	0.00410124	0.0225148
XLOC_049558	4.13691	-1.9398	0.674941	-2.87403	0.00405274	0.0222797
XLOC_056029	2.71679	-1.93903	0.66939	-2.89671	0.00377095	0.0209604
XLOC_042437	4.45895	-1.93842	0.676027	-2.86737	0.00413893	0.0226928
XLOC_030636	3.07597	-1.93773	0.677146	-2.86161	0.004215	0.0230572
XLOC_053667	6.31603	-1.93771	0.66683	-2.90586	0.00366247	0.0204232
XLOC_003272	93.0273	-1.93635	0.341622	-5.66812	1.4437e-08	2.16144e-07	AXIN1
XLOC_009949	8.38617	-1.93538	0.650109	-2.97701	0.00291073	0.0167553
XLOC_060533	48.3902	-1.93505	0.444945	-4.34896	1.36785e-05	0.000133786	COL3A1
XLOC_000770	2.82035	-1.93479	0.676531	-2.85986	0.00423825	0.0231608
XLOC_063487	39.2786	-1.93373	0.398053	-4.85797	1.18594e-06	1.3681e-05	ycf2-A
XLOC_015501	5.11848	-1.93227	0.669609	-2.88567	0.00390585	0.0215819
XLOC_000121	44.0392	-1.93226	0.426037	-4.53543	5.74868e-06	5.96196e-05	TDRD6
XLOC_050159	4.01469	-1.93212	0.676854	-2.85457	0.00430957	0.023494
XLOC_030464	25.861	-1.93198	0.457203	-4.22565	2.38247e-05	0.000223204
XLOC_002941	7.89765	-1.93198	0.636121	-3.03713	0.0023884	0.0141199
XLOC_055187	4.86559	-1.93141	0.657517	-2.93743	0.00330944	0.0186768
XLOC_033955	2.65446	-1.93134	0.673962	-2.86565	0.00416153	0.0227964
XLOC_023514	2.29264	-1.93028	0.662252	-2.91473	0.00355999	0.0199316
XLOC_059087	11.0979	-1.93008	0.585861	-3.29444	0.000986194	0.00647746
XLOC_065828	12.5282	-1.92833	0.598543	-3.2217	0.00127432	0.00812137
XLOC_062353	42.5301	-1.92777	0.383208	-5.03062	4.88896e-07	5.94183e-06	DMBT1
XLOC_057282	1503.65	-1.9276	0.102581	-18.7911	8.93901e-79	3.26751e-76	unknown
XLOC_010368	11.0102	-1.92758	0.654995	-2.94289	0.00325161	0.0184003
XLOC_017543	1448.06	-1.92735	0.161898	-11.9047	1.11895e-32	8.88832e-31	EBF3
XLOC_017543	1448.06	-1.92735	0.161898	-11.9047	1.11895e-32	8.88832e-31	coe3
XLOC_016233	5.0224	-1.9262	0.676886	-2.84568	0.00443161	0.024062
XLOC_055791	8.32114	-1.92372	0.668527	-2.87754	0.00400784	0.022061	SYT4
XLOC_015032	4080.53	-1.92369	0.159392	-12.0689	1.54116e-33	1.2833e-31
XLOC_023501	2.51383	-1.92366	0.660697	-2.91156	0.00359633	0.0201038
XLOC_053597	2.2547	-1.92263	0.662716	-2.90114	0.00371805	0.0206984
XLOC_044327	21.4031	-1.92253	0.579585	-3.31707	0.000909667	0.00602344
XLOC_045427	3.535	-1.92106	0.675599	-2.84348	0.00446234	0.0241893
XLOC_014591	2.64094	-1.91778	0.669204	-2.86576	0.00416011	0.0227916
XLOC_052271	9.20152	-1.91683	0.655115	-2.92594	0.0034342	0.0192905	DGKD
XLOC_029647	205.273	-1.91484	0.651949	-2.93709	0.00331303	0.0186847	FOXA2
XLOC_067210	10.8383	-1.91424	0.594958	-3.21744	0.0012934	0.00822954	Matn4
XLOC_042503	10.1926	-1.91401	0.644828	-2.96825	0.002995	0.0171467
XLOC_001870	28.9605	-1.91386	0.411973	-4.64559	3.39112e-06	3.66039e-05	PPFIBP2
XLOC_046773	5.98826	-1.91311	0.671386	-2.84949	0.00437896	0.0238151
XLOC_050465	28.1416	-1.91287	0.498573	-3.8367	0.000124697	0.00101234	KL
XLOC_053668	2.18275	-1.91084	0.662342	-2.88498	0.00391445	0.0216214
XLOC_057894	18.3416	-1.91056	0.535992	-3.56453	0.000364511	0.00267071
XLOC_022224	25.7214	-1.90944	0.403833	-4.7283	2.26406e-06	2.51884e-05
XLOC_043628	3.55273	-1.90851	0.669643	-2.85004	0.00437141	0.02378
XLOC_015112	13.7648	-1.90758	0.557598	-3.42107	0.000623761	0.00431441
XLOC_036483	13.3739	-1.90732	0.531007	-3.59189	0.000328289	0.00243008
XLOC_042410	8.68297	-1.90727	0.614479	-3.10388	0.00190999	0.0115902
XLOC_017822	78.6967	-1.90699	0.280155	-6.80691	9.97178e-12	2.11774e-10
XLOC_023923	83.337	-1.90669	0.28802	-6.61997	3.59269e-11	7.24128e-10	Yars2
XLOC_005412	102.471	-1.906	0.295095	-6.45896	1.05426e-10	2.01655e-09	Naa15
XLOC_020594	71.7871	-1.9044	0.29031	-6.55989	5.38481e-11	1.06347e-09	Acadsb
XLOC_067635	2.52265	-1.90281	0.668896	-2.84471	0.00444521	0.0241207
XLOC_053699	2.7078	-1.90227	0.675363	-2.81666	0.00485252	0.0260301
XLOC_071850	3.27016	-1.90121	0.676614	-2.80989	0.00495585	0.026508
XLOC_014211	2.25145	-1.90012	0.660611	-2.87631	0.00402355	0.022139
XLOC_011859	7.16316	-1.89761	0.654474	-2.89945	0.00373819	0.0207917	SERPINB4
XLOC_011859	7.16316	-1.89761	0.654474	-2.89945	0.00373819	0.0207917	OTUB1
XLOC_005987	11.5166	-1.89678	0.602239	-3.14954	0.00163529	0.0101183
XLOC_004065	2.13719	-1.89642	0.661298	-2.86771	0.00413448	0.0226742
XLOC_059578	2.43107	-1.89631	0.660418	-2.87138	0.00408687	0.0224388
XLOC_068639	19.7941	-1.89553	0.545722	-3.47344	0.000513831	0.00364644
XLOC_050037	15.0378	-1.89546	0.606784	-3.12378	0.00178546	0.0109222
XLOC_041514	10.6771	-1.89497	0.604952	-3.13243	0.00173364	0.010649
XLOC_012746	221.244	-1.89287	0.343331	-5.51326	3.52256e-08	5.02775e-07	VWA7
XLOC_041389	2.56807	-1.89197	0.66947	-2.82608	0.0047122	0.0253684
XLOC_056963	5.72613	-1.89186	0.664043	-2.849	0.00438563	0.0238484
XLOC_003587	2523.82	-1.8918	0.104241	-18.1483	1.3244e-73	4.2315e-71	TOMM70A
XLOC_003587	2523.82	-1.8918	0.104241	-18.1483	1.3244e-73	4.2315e-71	ACP6
XLOC_062068	6.10832	-1.8912	0.637276	-2.96764	0.00300096	0.0171763	ZP2
XLOC_044018	11.7396	-1.8891	0.641757	-2.94364	0.00324376	0.0183637
XLOC_039762	14.7647	-1.88842	0.57887	-3.26225	0.00110531	0.00717244
XLOC_012584	23.6154	-1.88837	0.471566	-4.00447	6.2157e-05	0.000535525
XLOC_023881	38.8674	-1.88559	0.430484	-4.38017	1.18589e-05	0.000116809
XLOC_003700	29.3805	-1.88497	0.432432	-4.359	1.30658e-05	0.000127997
XLOC_070362	26.1235	-1.88447	0.500372	-3.76615	0.000165786	0.00131498	Slc4a11
XLOC_062742	34.2685	-1.8827	0.446212	-4.21931	2.45053e-05	0.000229381	DMBT1
XLOC_058100	9.92153	-1.88261	0.627444	-3.00043	0.00269595	0.0156591
XLOC_067134	4.25481	-1.88176	0.668155	-2.81635	0.00485724	0.0260517
XLOC_000020	6.86987	-1.88153	0.651664	-2.88727	0.00388604	0.0214893
XLOC_029376	3.7751	-1.88112	0.676131	-2.78219	0.00539941	0.0284466	unknown
XLOC_029376	3.7751	-1.88112	0.676131	-2.78219	0.00539941	0.0284466	PSMD8
XLOC_021619	21.6514	-1.88035	0.46453	-4.04786	5.16889e-05	0.000452048	C1qtnf1
XLOC_037223	2.5929	-1.8777	0.670035	-2.80239	0.00507254	0.027025
XLOC_064191	160.133	-1.87645	0.273976	-6.84896	7.4387e-12	1.60427e-10
XLOC_038027	2.41245	-1.87602	0.658581	-2.84857	0.00439161	0.0238779
XLOC_053756	29.1412	-1.87432	0.408037	-4.59351	4.35845e-06	4.61899e-05	unknown
XLOC_054085	38.871	-1.87404	0.414531	-4.52086	6.15879e-06	6.35824e-05	ZP3
XLOC_062172	28.6889	-1.87314	0.458694	-4.08364	4.43359e-05	0.000393728	ZP3
XLOC_005088	53.027	-1.8731	0.316008	-5.92739	3.07795e-09	5.03455e-08	MYH7
XLOC_063041	7.70596	-1.87267	0.665022	-2.81595	0.00486331	0.0260777
XLOC_053679	8.98665	-1.87265	0.575399	-3.25452	0.00113584	0.00733303
XLOC_030923	81.4062	-1.87261	0.283014	-6.61666	3.67397e-11	7.39129e-10	gro2
XLOC_041161	2.27061	-1.87187	0.659692	-2.83749	0.00454699	0.024608
XLOC_012767	7.41712	-1.87147	0.676749	-2.76538	0.00568562	0.029733	C3
XLOC_046174	4.31046	-1.87046	0.676815	-2.76362	0.0057164	0.0298722
XLOC_020700	36.7478	-1.86852	0.526102	-3.55163	0.000382858	0.0027928	Hhex
XLOC_071134	6.53854	-1.86652	0.64667	-2.88636	0.00389722	0.0215424
XLOC_016817	4.43983	-1.86567	0.666259	-2.80022	0.0051068	0.0271705	MUC5B
XLOC_058747	2.61105	-1.86566	0.666807	-2.7979	0.00514356	0.027329
XLOC_017810	11.1576	-1.86479	0.608479	-3.06467	0.0021791	0.0130398
XLOC_027984	4.26259	-1.86284	0.670394	-2.77872	0.00545736	0.0286994
XLOC_041568	188.769	-1.86242	0.213618	-8.71847	2.81974e-18	1.02291e-16	PTPRF
XLOC_041568	188.769	-1.86242	0.213618	-8.71847	2.81974e-18	1.02291e-16	Ptprd
XLOC_021814	2.30016	-1.86102	0.65876	-2.82504	0.00472748	0.0254411
XLOC_055479	2.15878	-1.86044	0.659389	-2.82147	0.00478044	0.0256944
XLOC_050969	6.89584	-1.85815	0.668002	-2.78166	0.00540815	0.0284857
XLOC_008776	49.3464	-1.85665	0.413848	-4.4863	7.24708e-06	7.39679e-05
XLOC_045394	7.51969	-1.85655	0.661797	-2.80531	0.00502681	0.0268277
XLOC_003742	318.627	-1.85514	0.179053	-10.3608	3.73736e-25	2.05094e-23	HSD3B
XLOC_052320	11.4298	-1.85476	0.591092	-3.13786	0.00170184	0.0104805
XLOC_053714	23.5569	-1.85331	0.501545	-3.69521	0.000219706	0.00169528
XLOC_071018	2.06044	-1.85085	0.659653	-2.80579	0.00501934	0.0268011	unknown
XLOC_053663	2.06044	-1.85085	0.659653	-2.80579	0.00501934	0.0268011
XLOC_054548	13.5237	-1.84998	0.568409	-3.25467	0.00113524	0.00733028
XLOC_052849	4.68868	-1.84997	0.677307	-2.73136	0.00630742	0.0324768
XLOC_050345	42.3482	-1.84754	0.385336	-4.79462	1.62981e-06	1.84559e-05
XLOC_006136	2.58363	-1.8447	0.674414	-2.73527	0.00623294	0.0321624
XLOC_014817	33.6075	-1.8433	0.440714	-4.18253	2.88279e-05	0.000265691
XLOC_056557	10.2233	-1.843	0.643631	-2.86344	0.00419066	0.0229386
XLOC_038260	8.63101	-1.84292	0.597986	-3.08188	0.00205696	0.0123811
XLOC_028838	36.0233	-1.84241	0.430861	-4.27612	1.9018e-05	0.000181363
XLOC_052419	330.767	-1.84142	0.450113	-4.091	4.29509e-05	0.00038269	Spidroin-2
XLOC_019075	14.6513	-1.84121	0.57159	-3.22122	0.00127647	0.00813026
XLOC_021135	2.31568	-1.84099	0.670443	-2.74594	0.00603384	0.0312885
XLOC_005047	15.3956	-1.84097	0.548381	-3.3571	0.000787656	0.00529932	SPEG
XLOC_035277	4.75267	-1.84038	0.663954	-2.77185	0.00557388	0.0292089
XLOC_038281	2.8704	-1.83938	0.673696	-2.73028	0.00632808	0.0325559
XLOC_037428	50.8888	-1.83927	0.389512	-4.722	2.33536e-06	2.59349e-05	TRIM55
XLOC_056424	534.112	-1.83647	0.167221	-10.9823	4.64794e-28	3.0468e-26
XLOC_030877	10.2434	-1.83571	0.619333	-2.96401	0.00303656	0.0173501
XLOC_013832	243.535	-1.83488	0.210027	-8.73639	2.40673e-18	8.7751e-17
XLOC_065407	2.99612	-1.83479	0.672353	-2.72891	0.00635438	0.032664
XLOC_012708	9.53224	-1.83458	0.604228	-3.03624	0.00239551	0.0141522
XLOC_033399	3.18728	-1.83246	0.670091	-2.73464	0.00624486	0.0322123
XLOC_054992	5.57299	-1.83062	0.675379	-2.71051	0.006718	0.0342111	Cntnap2
XLOC_052323	5.00502	-1.83055	0.655025	-2.79463	0.00519587	0.0275662
XLOC_020933	7.3018	-1.83045	0.657588	-2.78358	0.0053763	0.0283526
XLOC_007041	2.95881	-1.83042	0.668986	-2.73611	0.00621701	0.0321032
XLOC_054475	10.926	-1.83002	0.645706	-2.83413	0.00459502	0.0248243
XLOC_014954	3444.41	-1.82924	0.136675	-13.3839	7.5082e-41	8.45564e-39	STOX2
XLOC_014954	3444.41	-1.82924	0.136675	-13.3839	7.5082e-41	8.45564e-39	STOX1
XLOC_069470	10.9235	-1.82703	0.603352	-3.02814	0.00246064	0.0144795	ZP3
XLOC_071760	8.27706	-1.8268	0.676496	-2.70038	0.00692599	0.035092
XLOC_017843	36.6544	-1.82605	0.677746	-2.6943	0.00705359	0.0355715	unknown
XLOC_017843	36.6544	-1.82605	0.677746	-2.6943	0.00705359	0.0355715	ENTPD3
XLOC_068505	4143.88	-1.82481	0.230887	-7.90349	2.71206e-15	7.88801e-14
XLOC_069247	2.68547	-1.82446	0.672302	-2.71374	0.00665274	0.0339308
XLOC_024266	4.54221	-1.82437	0.676569	-2.69651	0.0070071	0.0353908
XLOC_018387	2.60035	-1.82434	0.675251	-2.70173	0.00689806	0.0349933
XLOC_060964	11.0576	-1.82409	0.559263	-3.2616	0.00110785	0.00718571
XLOC_052824	2.65508	-1.82368	0.675047	-2.70155	0.00690164	0.0349933
XLOC_069311	34.982	-1.82284	0.528169	-3.45125	0.000557986	0.00391471
XLOC_010018	4.00182	-1.82268	0.67704	-2.69213	0.0070998	0.0357543
XLOC_022495	2.79191	-1.82236	0.671048	-2.71569	0.00661372	0.0337797
XLOC_013101	2.99105	-1.82142	0.677409	-2.6888	0.00717094	0.0360873
XLOC_037427	71.8204	-1.81896	0.318371	-5.71334	1.10781e-08	1.68893e-07	TRIM54
XLOC_068285	598.683	-1.81735	0.446164	-4.07328	4.63554e-05	0.000409639
XLOC_059335	191.414	-1.81664	0.293649	-6.18644	6.1539e-10	1.08607e-08
XLOC_006129	2.34076	-1.81636	0.668287	-2.71794	0.00656897	0.033587
XLOC_019395	18.5067	-1.81588	0.488311	-3.7187	0.00020025	0.00156079
XLOC_032355	7.282	-1.81537	0.673015	-2.69736	0.00698908	0.0353163
XLOC_002136	196.464	-1.81408	0.214426	-8.46019	2.66933e-17	9.04447e-16	Fn3krp
XLOC_061648	7.1821	-1.81391	0.628222	-2.88737	0.00388479	0.0214866	clcB
XLOC_060159	3.09515	-1.81276	0.671872	-2.69807	0.00697433	0.0352582
XLOC_062171	10.8325	-1.81208	0.575968	-3.14614	0.00165442	0.0102191	ZP3
XLOC_001863	16.3656	-1.81185	0.568494	-3.18711	0.00143705	0.0090369
XLOC_043992	7.08308	-1.81183	0.629294	-2.87915	0.00398755	0.0219605
XLOC_016012	14.5864	-1.81093	0.530511	-3.41356	0.000641205	0.00441877
XLOC_070333	9.26034	-1.81087	0.635842	-2.84799	0.0043996	0.0239124
XLOC_052209	5.20818	-1.81033	0.667269	-2.71304	0.00666695	0.0339867
XLOC_051215	3.56618	-1.80992	0.675129	-2.68086	0.00734338	0.0368733
XLOC_051515	2.49928	-1.80796	0.665832	-2.71534	0.00662079	0.0338078	MAM
XLOC_003293	4.2984	-1.80791	0.660235	-2.73828	0.0061761	0.0319187	Trim55
XLOC_018670	35.8782	-1.80558	0.482045	-3.74566	0.000179918	0.00141536
XLOC_021070	3.4843	-1.80526	0.666792	-2.70738	0.00678172	0.0344908
XLOC_006933	62.8293	-1.80491	0.360626	-5.00493	5.58818e-07	6.73658e-06	Pdk3
XLOC_011103	105.851	-1.80304	0.278637	-6.47091	9.74139e-11	1.87244e-09
XLOC_011708	439.925	-1.80284	0.475936	-3.78798	0.000151878	0.00121202
XLOC_057563	13.6036	-1.80283	0.535585	-3.36609	0.000762418	0.00515283	EYA1
XLOC_023922	9.654	-1.80228	0.582041	-3.09648	0.0019583	0.0118568	CACNA1S
XLOC_026740	17.1883	-1.80209	0.524131	-3.43825	0.000585484	0.00407976
XLOC_023946	2385.73	-1.80204	0.115663	-15.5801	9.94136e-55	1.87249e-52	PRICKLE2
XLOC_063754	56.8763	-1.80174	0.428569	-4.20409	2.62136e-05	0.000243994
XLOC_049960	2.87315	-1.80037	0.671698	-2.68033	0.00735503	0.0369103
XLOC_019503	11.0428	-1.79876	0.570075	-3.15531	0.00160329	0.00994603
XLOC_045228	10.9755	-1.79523	0.597379	-3.00518	0.00265428	0.0154482	hox-zeta3
XLOC_037392	6062.6	-1.79505	0.173111	-10.3694	3.41702e-25	1.87993e-23	Ptprm
XLOC_037392	6062.6	-1.79505	0.173111	-10.3694	3.41702e-25	1.87993e-23	PTPRK
XLOC_033148	23.8219	-1.79316	0.567112	-3.16191	0.00156738	0.0097541	Astn2
XLOC_039480	345.775	-1.79281	0.165706	-10.8192	2.79284e-27	1.73829e-25
XLOC_033366	2.60671	-1.79272	0.669198	-2.67891	0.00738633	0.0370539
XLOC_054244	8.3284	-1.79221	0.622232	-2.8803	0.00397302	0.0219014
XLOC_070444	11.9991	-1.79209	0.547437	-3.2736	0.00106186	0.0069186
XLOC_000716	2.0236	-1.79137	0.656137	-2.73018	0.00632998	0.0325618
XLOC_034605	3.10618	-1.79061	0.674679	-2.65401	0.00795407	0.0394484
XLOC_036773	686.103	-1.79058	0.208333	-8.59483	8.33881e-18	2.9171e-16	Gpr157
XLOC_067932	4.95041	-1.78936	0.676992	-2.6431	0.00821512	0.0405426
XLOC_006407	308.227	-1.78899	0.25761	-6.94457	3.79612e-12	8.43142e-11	skap-epsilon
XLOC_063786	8.7962	-1.78757	0.626289	-2.85423	0.00431413	0.0235159
XLOC_043260	2.15582	-1.78703	0.655585	-2.72585	0.00641368	0.0329217
XLOC_045008	3.26804	-1.78641	0.6775	-2.63677	0.0083699	0.0411277
XLOC_018552	3.15332	-1.78499	0.676914	-2.63695	0.00836541	0.0411244	hox-beta7
XLOC_042756	81.9069	-1.7834	0.304645	-5.85401	4.79853e-09	7.68852e-08	B3GALT6
XLOC_019319	3.33755	-1.782	0.677295	-2.63105	0.00851222	0.0417225
XLOC_056099	4.08929	-1.78062	0.677163	-2.62954	0.00855011	0.0418654
XLOC_002939	21.5045	-1.78056	0.54336	-3.27695	0.00104936	0.00684645
XLOC_041355	302.713	-1.77928	0.658594	-2.70164	0.00689981	0.0349933
XLOC_021071	38.9432	-1.77807	0.678159	-2.6219	0.00874408	0.0426553
XLOC_055043	3.86679	-1.77802	0.677499	-2.62439	0.00868036	0.0423669
XLOC_028424	17.2403	-1.77733	0.49116	-3.61864	0.000296156	0.00221619
XLOC_008402	6.72706	-1.77696	0.636159	-2.79327	0.00521783	0.027665
XLOC_044497	8.66625	-1.77543	0.637134	-2.78658	0.00532671	0.0281289
XLOC_052314	24.8197	-1.77427	0.482551	-3.67686	0.000236121	0.00180995
XLOC_044137	982.905	-1.77301	0.376882	-4.70443	2.54573e-06	2.80975e-05	unknown
XLOC_030832	3.02903	-1.77228	0.673874	-2.62999	0.00853877	0.0418288
XLOC_035545	4.38946	-1.77044	0.671379	-2.63703	0.00836364	0.0411244
XLOC_059461	2.31938	-1.7699	0.667064	-2.65328	0.00797148	0.0395302
XLOC_014790	25.7828	-1.76971	0.580878	-3.04661	0.00231437	0.0137444	Tectb
XLOC_071435	18.5383	-1.76912	0.543282	-3.25635	0.00112854	0.00729792
XLOC_009938	3.39793	-1.76786	0.674962	-2.6192	0.00881366	0.0429316
XLOC_050824	4.8385	-1.76693	0.672533	-2.62728	0.00860705	0.0420721
XLOC_021415	62.5083	-1.76497	0.373936	-4.71999	2.35857e-06	2.61792e-05
XLOC_027362	117.53	-1.76465	0.362247	-4.8714	1.10812e-06	1.28347e-05
XLOC_057994	3.65498	-1.76283	0.670323	-2.62982	0.00854304	0.041845
XLOC_052465	353.647	-1.7626	0.188064	-9.37236	7.09286e-21	3.0201e-19	Hapln3
XLOC_028687	531.561	-1.76245	0.157296	-11.2046	3.87062e-29	2.65003e-27	FKBP9
XLOC_028687	531.561	-1.76245	0.157296	-11.2046	3.87062e-29	2.65003e-27	Crtap
XLOC_028044	3.5139	-1.76186	0.675888	-2.60673	0.00914101	0.0442464	Fbln2
XLOC_023168	837.721	-1.76144	0.178724	-9.85565	6.47973e-23	3.13681e-21	unknown
XLOC_023168	837.721	-1.76144	0.178724	-9.85565	6.47973e-23	3.13681e-21	MTUS1
XLOC_018832	99.5194	-1.7603	0.265762	-6.62361	3.50528e-11	7.07171e-10	DGKG
XLOC_052842	6.03028	-1.76013	0.651496	-2.70168	0.00689909	0.0349933
XLOC_017997	10.4198	-1.75925	0.601131	-2.92658	0.00342717	0.019263
XLOC_056103	4.26889	-1.75783	0.663768	-2.64825	0.00809093	0.0400305
XLOC_044709	8.59614	-1.7577	0.598605	-2.93632	0.00332135	0.0187196
XLOC_018721	24.1111	-1.75713	0.564193	-3.11441	0.00184313	0.0112303
XLOC_000929	50.2877	-1.75556	0.352781	-4.97635	6.47933e-07	7.74808e-06
XLOC_015499	3.42031	-1.75474	0.677438	-2.59026	0.00959024	0.0460846
XLOC_006140	2.72571	-1.75405	0.6718	-2.61096	0.00902872	0.0437716
XLOC_004068	1.95601	-1.75367	0.654174	-2.68074	0.00734601	0.0368823
XLOC_065608	2.34081	-1.75364	0.663543	-2.64284	0.00822127	0.0405611
XLOC_003358	8.85523	-1.75309	0.634464	-2.76311	0.00572537	0.0299119
XLOC_071357	6.25109	-1.75208	0.650826	-2.69208	0.00710072	0.0357548	FLT3
XLOC_066266	32.1516	-1.75152	0.473352	-3.70024	0.000215397	0.0016665
XLOC_072154	4.10828	-1.75125	0.671943	-2.60625	0.00915386	0.0442887
XLOC_067431	5.08414	-1.75073	0.677494	-2.58413	0.00976239	0.0467868
XLOC_021643	18.5315	-1.74916	0.543697	-3.21716	0.00129465	0.00823629	clp-1
XLOC_029536	238.428	-1.74836	0.250037	-6.99243	2.70173e-12	6.09167e-11	DLL1
XLOC_060011	1.85212	-1.7477	0.654496	-2.6703	0.00757832	0.0378854
XLOC_041735	5.28208	-1.74755	0.668852	-2.61276	0.0089814	0.0435863
XLOC_030921	34.7721	-1.74689	0.399473	-4.37299	1.22554e-05	0.000120412	tle4
XLOC_030921	34.7721	-1.74689	0.399473	-4.37299	1.22554e-05	0.000120412	gro2
XLOC_014009	27.4564	-1.74658	0.424447	-4.11497	3.87238e-05	0.000348191	NATD1
XLOC_044436	23.7356	-1.74601	0.605392	-2.88409	0.00392544	0.0216711
XLOC_038277	2.5241	-1.74496	0.671996	-2.59669	0.00941279	0.0453836
XLOC_006128	2.0993	-1.74424	0.666797	-2.61584	0.00890077	0.0432801
XLOC_052321	5.99308	-1.74413	0.639215	-2.72854	0.00636147	0.0326849
XLOC_026494	5.50709	-1.7424	0.66722	-2.61143	0.0090164	0.0437266
XLOC_001410	4.97996	-1.74183	0.672086	-2.59168	0.00955096	0.0459251
XLOC_049497	4.62777	-1.7413	0.674355	-2.58218	0.00981797	0.0470166
XLOC_044191	1175.87	-1.7413	0.142942	-12.1818	3.88509e-34	3.31177e-32	RAB20
XLOC_044191	1175.87	-1.7413	0.142942	-12.1818	3.88509e-34	3.31177e-32	Galnt3
XLOC_005179	12.15	-1.74052	0.565458	-3.07807	0.00208344	0.0125276
XLOC_060277	4.52373	-1.74047	0.671369	-2.59243	0.00953015	0.0458399
XLOC_036112	1.85397	-1.73996	0.654062	-2.66024	0.00780846	0.0388648
XLOC_015881	26.0646	-1.73926	0.471026	-3.6925	0.000222064	0.00171194	unknown
XLOC_015881	26.0646	-1.73926	0.471026	-3.6925	0.000222064	0.00171194	Adamtsl1
XLOC_028084	15.7122	-1.7379	0.60165	-2.88855	0.00387018	0.0214181	unknown
XLOC_017797	43.6904	-1.73617	0.368948	-4.70574	2.52952e-06	2.79329e-05	ATP6V1B2
XLOC_045854	1002.12	-1.73422	0.228749	-7.58132	3.42049e-14	9.08473e-13	unknown
XLOC_045854	1002.12	-1.73422	0.228749	-7.58132	3.42049e-14	9.08473e-13	FZD4
XLOC_012225	5.81145	-1.73403	0.650636	-2.66513	0.00769584	0.0383794
XLOC_056301	3.66646	-1.7338	0.675536	-2.56655	0.0102716	0.0488795
XLOC_008118	66.4147	-1.73344	0.446368	-3.88343	0.000102993	0.000849241	FRMD3
XLOC_013167	22.8736	-1.7333	0.427515	-4.05437	5.02693e-05	0.000441153
XLOC_067081	64.8278	-1.73329	0.293433	-5.90694	3.48514e-09	5.65769e-08
XLOC_002465	1.9547	-1.73273	0.652513	-2.65547	0.00791978	0.0392919
XLOC_070047	3.62979	-1.73155	0.674632	-2.56666	0.0102682	0.0488792
XLOC_040581	7.27413	-1.73136	0.638344	-2.71226	0.00668262	0.0340469
XLOC_063137	1.89212	-1.72948	0.653306	-2.64728	0.00811431	0.0401232
XLOC_053793	1.89212	-1.72948	0.653306	-2.64728	0.00811431	0.0401232
XLOC_042419	1.90129	-1.72829	0.652599	-2.64832	0.00808922	0.0400305
XLOC_020078	2.9092	-1.72799	0.673748	-2.56475	0.0103251	0.0491124
XLOC_067552	2.93163	-1.72702	0.674695	-2.5597	0.0104761	0.0496885
XLOC_034610	56.0562	-1.72515	0.311298	-5.5418	2.99377e-08	4.31585e-07
XLOC_052245	8.85885	-1.72308	0.577652	-2.98291	0.00285519	0.0164797
XLOC_037625	2.28308	-1.72174	0.664341	-2.59165	0.00955172	0.0459251
XLOC_016060	57.5375	-1.72164	0.353074	-4.87615	1.08178e-06	1.25431e-05
XLOC_064133	1.88341	-1.71967	0.651987	-2.63758	0.00835002	0.0410721
XLOC_056964	17.7312	-1.71809	0.505518	-3.39867	0.000677145	0.00463976
XLOC_066193	50.6963	-1.71616	0.490452	-3.49914	0.000466768	0.00334493
XLOC_043766	51.0772	-1.7157	0.35081	-4.89067	1.00492e-06	1.17086e-05	unknown
XLOC_071655	29.5788	-1.71539	0.502214	-3.41566	0.000636288	0.00438839
XLOC_050979	29.5031	-1.71436	0.478428	-3.58331	0.000339269	0.00250362
XLOC_033716	5281.76	-1.71151	0.103729	-16.4998	3.68084e-61	8.31233e-59	snx10-delta
XLOC_035949	59.6546	-1.71044	0.326284	-5.2422	1.58671e-07	2.05653e-06	lhx5
XLOC_052979	2.25045	-1.70978	0.661533	-2.58458	0.00974975	0.0467366
XLOC_014916	20.4451	-1.7095	0.43387	-3.94012	8.14392e-05	0.000685274
XLOC_025752	9.70984	-1.70925	0.610746	-2.79862	0.00513209	0.0272815
XLOC_013515	11.6661	-1.70852	0.610021	-2.80076	0.00509827	0.0271352	unknown
XLOC_014704	23.1991	-1.7062	0.449524	-3.79556	0.000147309	0.00117817
XLOC_046172	7.68047	-1.70584	0.605256	-2.81837	0.00482678	0.0259108
XLOC_002090	50.661	-1.70567	0.338306	-5.0418	4.61163e-07	5.62857e-06	unknown
XLOC_018048	50.3459	-1.70428	0.396907	-4.29389	1.75567e-05	0.000168395
XLOC_020458	18.8492	-1.70248	0.482148	-3.53103	0.000413942	0.00300026	TDRD1
XLOC_010859	2.28033	-1.70058	0.659338	-2.57923	0.00990205	0.0473456
XLOC_038028	41.7535	-1.70006	0.403277	-4.21561	2.49107e-05	0.000232973
XLOC_000585	13.5597	-1.70005	0.55432	-3.06691	0.00216287	0.0129571
XLOC_007187	33.467	-1.69918	0.426954	-3.97977	6.89809e-05	0.000589295
XLOC_051218	16.364	-1.69719	0.617161	-2.74999	0.00595974	0.0309414
XLOC_021484	2.16672	-1.69702	0.648524	-2.61673	0.00887757	0.0431961
XLOC_034045	6.04296	-1.69494	0.639361	-2.65099	0.00802573	0.039749
XLOC_066884	17.2415	-1.69311	0.507479	-3.33632	0.000848942	0.0056657
XLOC_071638	10.4223	-1.69286	0.57642	-2.93685	0.00331567	0.0186948
XLOC_062748	136.743	-1.6924	0.277849	-6.09107	1.12161e-09	1.91901e-08	NXF1
XLOC_072011	12.0113	-1.69092	0.608816	-2.77739	0.00547976	0.0287856
XLOC_068937	2067.82	-1.6907	0.201776	-8.37913	5.33214e-17	1.77189e-15
XLOC_052313	15.7308	-1.69017	0.578887	-2.91968	0.0035039	0.0196507
XLOC_049499	7.73433	-1.6892	0.639683	-2.64067	0.00827411	0.0407638
XLOC_063148	1.82203	-1.68909	0.650777	-2.59549	0.00944554	0.045511
XLOC_006271	13.681	-1.68894	0.560709	-3.01214	0.00259409	0.0151491
XLOC_029974	13.8403	-1.68798	0.539385	-3.12946	0.00175128	0.0107405
XLOC_060208	23.8541	-1.68714	0.486924	-3.4649	0.000530431	0.00374637
XLOC_062624	37.8713	-1.68553	0.360809	-4.67154	2.98949e-06	3.25538e-05
XLOC_031241	349.54	-1.68543	0.174788	-9.64272	5.27726e-22	2.40363e-20	Fam189a1
XLOC_031136	32.3082	-1.68535	0.403583	-4.17597	2.96718e-05	0.000272885
XLOC_014429	10.4675	-1.68467	0.581956	-2.89484	0.00379349	0.0210667
XLOC_008046	17.2661	-1.68135	0.639841	-2.62777	0.00859473	0.0420313
XLOC_001921	570.186	-1.68063	0.151244	-11.112	1.09626e-28	7.35811e-27	MPPED2
XLOC_016628	4896.92	-1.67985	0.131314	-12.7926	1.8039e-37	1.78868e-35	nav3
XLOC_016628	4896.92	-1.67985	0.131314	-12.7926	1.8039e-37	1.78868e-35	NAV2
XLOC_049549	14.8472	-1.67956	0.544336	-3.08553	0.00203189	0.0122593
XLOC_066231	12.1759	-1.67842	0.529155	-3.17189	0.00151451	0.0094702
XLOC_048216	10.196	-1.67825	0.577001	-2.90857	0.0036309	0.0202655
XLOC_068506	392.142	-1.67712	0.446663	-3.75478	0.000173494	0.00137057
XLOC_070364	6.86906	-1.67563	0.650523	-2.57582	0.0100003	0.0477888
XLOC_005500	191.909	-1.67235	0.251178	-6.65803	2.77525e-11	5.66515e-10
XLOC_031092	51.5896	-1.67177	0.313656	-5.32994	9.82455e-08	1.31562e-06	Shc1
XLOC_052303	16.2433	-1.67108	0.532188	-3.14002	0.00168936	0.0104155
XLOC_009082	15.5288	-1.67091	0.540745	-3.09001	0.00200149	0.0120978
XLOC_052041	12.1238	-1.67038	0.579033	-2.88478	0.00391688	0.0216321
XLOC_042277	1090.1	-1.66834	0.197187	-8.46072	2.6574e-17	9.01112e-16
XLOC_017793	167.582	-1.66777	0.290345	-5.74409	9.2414e-09	1.42615e-07	HSPA12A
XLOC_054727	131.42	-1.66754	0.305708	-5.4547	4.90562e-08	6.84549e-07
XLOC_044539	14.0957	-1.66742	0.519136	-3.21191	0.00131854	0.00837099
XLOC_061704	20.188	-1.66677	0.529834	-3.14583	0.00165618	0.0102285
XLOC_053178	11.1241	-1.66643	0.632365	-2.63523	0.00840804	0.0412822
XLOC_023380	25.2031	-1.66555	0.506468	-3.28855	0.00100706	0.00659934	Btk
XLOC_006274	212.435	-1.66526	0.292719	-5.68893	1.27834e-08	1.93063e-07
XLOC_001045	9.46506	-1.66511	0.612787	-2.71727	0.00658221	0.0336427
XLOC_025982	6.22012	-1.66396	0.643184	-2.58707	0.00967962	0.0464569
XLOC_040439	8.90521	-1.66341	0.612204	-2.71709	0.00658596	0.0336579
XLOC_035169	26.9219	-1.66303	0.495343	-3.35734	0.000786968	0.00529552	FN3K
XLOC_067299	22.9557	-1.66283	0.482794	-3.44418	0.000572803	0.00400563
XLOC_020043	13.6091	-1.66136	0.530843	-3.12967	0.00175005	0.0107345
XLOC_048215	9.23213	-1.65914	0.637695	-2.60177	0.00927429	0.044801	Hcn4
XLOC_053296	35.5377	-1.65894	0.444564	-3.73162	0.000190251	0.00148958
XLOC_018802	282.873	-1.65793	0.236929	-6.99758	2.60415e-12	5.87472e-11	ALS2
XLOC_009241	506.342	-1.65713	0.549014	-3.01837	0.0025414	0.0148877	COL11A1
XLOC_068440	9.7188	-1.65646	0.556977	-2.97402	0.0029393	0.0168861
XLOC_052091	34.8641	-1.65497	0.363962	-4.5471	5.43912e-06	5.65723e-05	Cuzd1
XLOC_057167	97.1369	-1.65371	0.257039	-6.43368	1.24555e-10	2.36984e-09	SLC16A8
XLOC_068936	296.175	-1.65325	0.293667	-5.62968	1.80541e-08	2.67053e-07
XLOC_050966	7.61403	-1.65156	0.627942	-2.63012	0.00853543	0.0418267
XLOC_032477	38.3489	-1.64974	0.508516	-3.24422	0.00117773	0.00756841	unknown
XLOC_041431	777.791	-1.6492	0.162351	-10.1582	3.0454e-24	1.56865e-22	unknown
XLOC_015675	30.1699	-1.64161	0.421783	-3.89208	9.93893e-05	0.000823623	rhbg
XLOC_031687	36.2445	-1.64009	0.399938	-4.10087	4.11604e-05	0.0003678
XLOC_003747	12.6108	-1.6379	0.58286	-2.8101	0.00495255	0.0265002	hpx
XLOC_019710	12.1002	-1.63772	0.545531	-3.00207	0.00268148	0.0155792
XLOC_016542	66.2498	-1.63729	0.36725	-4.45824	8.26362e-06	8.36505e-05
XLOC_039121	7.2987	-1.63673	0.637394	-2.56785	0.0102331	0.048745
XLOC_009213	434.362	-1.63633	0.173145	-9.4506	3.36897e-21	1.45898e-19	foxn4
XLOC_006821	2024.85	-1.63084	0.103994	-15.682	2.00869e-55	3.86789e-53	Gbx1
XLOC_024021	3859.41	-1.62843	0.127099	-12.8123	1.39921e-37	1.39704e-35	Sema3f
XLOC_024021	3859.41	-1.62843	0.127099	-12.8123	1.39921e-37	1.39704e-35	CD36
XLOC_062815	7.71407	-1.62842	0.635875	-2.56091	0.0104397	0.0495642
XLOC_002072	506.82	-1.62735	0.178225	-9.13086	6.79551e-20	2.74448e-18	Rdh10
XLOC_026126	10.9106	-1.62676	0.593911	-2.73906	0.00616154	0.0318511
XLOC_053723	86.8005	-1.62604	0.315208	-5.15863	2.48765e-07	3.15124e-06
XLOC_019680	748.549	-1.62495	0.168074	-9.66805	4.12153e-22	1.8872e-20
XLOC_050090	47.3969	-1.62456	0.329195	-4.93496	8.01665e-07	9.46571e-06	unknown
XLOC_028678	822.549	-1.62273	0.573096	-2.83151	0.00463281	0.025003	cxcr4-b
XLOC_061865	22.1019	-1.62138	0.496324	-3.26678	0.00108777	0.00707138	Myo7a
XLOC_057123	24.9702	-1.61916	0.445119	-3.63758	0.000275215	0.00207823
XLOC_038639	706.314	-1.61882	0.237474	-6.81681	9.3086e-12	1.98472e-10	unknown
XLOC_052244	16.2018	-1.61842	0.510689	-3.16909	0.00152915	0.00953961
XLOC_026395	12839.2	-1.61795	0.112462	-14.3866	6.27779e-47	8.96623e-45	PTK7
XLOC_035073	10.5888	-1.6159	0.611474	-2.64263	0.0082266	0.0405729	Uncharacterized
XLOC_008364	117.132	-1.61454	0.249627	-6.46782	9.94259e-11	1.90941e-09	tmem2
XLOC_060928	17.0789	-1.61082	0.534547	-3.01343	0.0025831	0.0151012
XLOC_008624	18.3977	-1.61041	0.48415	-3.32626	0.00088021	0.00584904
XLOC_060243	1079	-1.60947	0.172336	-9.33911	9.71488e-21	4.09611e-19	Chst11
XLOC_055869	141.498	-1.60944	0.284113	-5.66479	1.47202e-08	2.20079e-07	unknown
XLOC_062406	17.0737	-1.60892	0.587434	-2.7389	0.0061645	0.0318626
XLOC_023215	21.7307	-1.60471	0.469417	-3.41851	0.00062966	0.00434894
XLOC_039652	175.391	-1.60384	0.201728	-7.9505	1.85767e-15	5.4769e-14
XLOC_004338	10.8107	-1.6037	0.589749	-2.7193	0.00654208	0.0334653
XLOC_025976	10.3334	-1.60327	0.571691	-2.80443	0.00504063	0.0268782
XLOC_030328	350.249	-1.60093	0.295785	-5.41248	6.21565e-08	8.55455e-07	ets1-b
XLOC_013833	10.7053	-1.60041	0.602049	-2.65827	0.00785425	0.0390341
XLOC_045930	36.8154	-1.59894	0.356066	-4.49058	7.10287e-06	7.25475e-05
XLOC_040093	1338.4	-1.59883	0.133664	-11.9615	5.65083e-33	4.57293e-31	Bmp1
XLOC_015451	10.2018	-1.59854	0.567531	-2.81666	0.00485262	0.0260301
XLOC_051461	120.993	-1.59811	0.299989	-5.32723	9.97216e-08	1.33291e-06
XLOC_061501	10.8992	-1.5981	0.551747	-2.89644	0.00377424	0.0209759	B3GNT9
XLOC_044378	12.3293	-1.59789	0.565012	-2.82807	0.00468295	0.0252329
XLOC_052138	51.6482	-1.5974	0.324755	-4.9188	8.70759e-07	1.02283e-05
XLOC_038487	37.3037	-1.59659	0.354964	-4.49789	6.86298e-06	7.02636e-05
XLOC_065063	604.36	-1.59625	0.281611	-5.66827	1.44247e-08	2.16035e-07
XLOC_006252	18.242	-1.59562	0.493831	-3.23111	0.00123309	0.0078842
XLOC_010451	8.44849	-1.59507	0.602553	-2.64718	0.00811659	0.0401299
XLOC_024828	1297.8	-1.59488	0.203409	-7.84075	4.47867e-15	1.27342e-13	ptc
XLOC_063733	10.7127	-1.59428	0.553393	-2.88092	0.00396522	0.0218683
XLOC_055020	859.166	-1.59221	0.119638	-13.3085	2.06568e-40	2.3023e-38	FYCO1
XLOC_055020	859.166	-1.59221	0.119638	-13.3085	2.06568e-40	2.3023e-38	Fyco1
XLOC_055020	859.166	-1.59221	0.119638	-13.3085	2.06568e-40	2.3023e-38	DNAJC13
XLOC_046384	357.96	-1.5921	0.148781	-10.701	1.00735e-26	6.08541e-25	MBNL3
XLOC_063392	112.651	-1.59082	0.293815	-5.41435	6.15123e-08	8.47401e-07	Arhgef4
XLOC_063795	26.6068	-1.58896	0.44121	-3.60137	0.000316542	0.00235363
XLOC_028854	14.2599	-1.58661	0.561374	-2.82629	0.00470907	0.0253547	unknown
XLOC_048101	26.5783	-1.58528	0.416804	-3.80341	0.000142717	0.0011442
XLOC_009081	27.8821	-1.58524	0.456106	-3.47559	0.000509723	0.00362146
XLOC_042276	996.564	-1.58256	0.139641	-11.3331	8.99633e-30	6.33016e-28
XLOC_052094	33.3042	-1.57984	0.368778	-4.284	1.83563e-05	0.000175441	TGM2
XLOC_051011	979.594	-1.57896	0.188602	-8.3719	5.66973e-17	1.87828e-15	PTK7
XLOC_004167	22.7862	-1.57319	0.553565	-2.84191	0.00448435	0.0242933
XLOC_053926	58.0463	-1.57318	0.325538	-4.83255	1.34794e-06	1.54056e-05	PHACTR1
XLOC_053926	58.0463	-1.57318	0.325538	-4.83255	1.34794e-06	1.54056e-05	Phactr1
XLOC_001804	57.7113	-1.57299	0.328617	-4.78671	1.69539e-06	1.91634e-05	NXF1
XLOC_017483	40.8088	-1.57246	0.438193	-3.58852	0.000332559	0.00245747	ENTPD3
XLOC_017483	40.8088	-1.57246	0.438193	-3.58852	0.000332559	0.00245747	ENTPD2
XLOC_012018	15.91	-1.57085	0.563703	-2.78667	0.00532531	0.028125
XLOC_025488	24.3531	-1.57069	0.534063	-2.94103	0.00327123	0.0184949	RDH8
XLOC_052334	26.9181	-1.5704	0.425618	-3.68969	0.000224529	0.00172846
XLOC_036513	10.2239	-1.56922	0.595739	-2.63408	0.00843663	0.0413896
XLOC_060280	8.44357	-1.56876	0.613187	-2.55837	0.0105165	0.0498417
XLOC_026571	8.53776	-1.56816	0.608868	-2.57553	0.0100086	0.0478235
XLOC_058311	8.2642	-1.56726	0.581806	-2.69378	0.00706458	0.0356102
XLOC_061500	20.7014	-1.56476	0.483728	-3.23479	0.00121732	0.0077961	B3GNT9
XLOC_019836	19819.2	-1.55784	0.159513	-9.76621	1.57226e-22	7.43598e-21	COL22A1
XLOC_013565	11.0038	-1.55524	0.554518	-2.80467	0.00503674	0.0268674	HOG1
XLOC_067122	13.1683	-1.55154	0.58047	-2.67291	0.0075196	0.0376224
XLOC_000272	49.7662	-1.54965	0.481056	-3.22136	0.00127584	0.00812743	unknown
XLOC_010694	624.153	-1.54729	0.152957	-10.1159	4.69631e-24	2.39723e-22
XLOC_064384	383.093	-1.54726	0.189248	-8.17581	2.93878e-16	9.23896e-15
XLOC_028647	321.391	-1.54715	0.204145	-7.57869	3.49049e-14	9.26493e-13	RFTN2
XLOC_049182	9.22623	-1.54687	0.580211	-2.66605	0.00767474	0.038292	Krt19
XLOC_049182	9.22623	-1.54687	0.580211	-2.66605	0.00767474	0.038292	krt18
XLOC_064377	2430.35	-1.54582	0.199851	-7.73486	1.03521e-14	2.86412e-13
XLOC_017803	145.191	-1.545	0.229644	-6.72779	1.72257e-11	3.57897e-10	lbx1
XLOC_000122	128.99	-1.54454	0.295753	-5.22242	1.76599e-07	2.27313e-06	TDRD6
XLOC_000122	128.99	-1.54454	0.295753	-5.22242	1.76599e-07	2.27313e-06	TDRD15
XLOC_059994	16.6491	-1.54355	0.496683	-3.10773	0.00188532	0.0114599
XLOC_030205	360.613	-1.54335	0.291854	-5.28808	1.23608e-07	1.62796e-06	Bco2
XLOC_050978	33.0307	-1.54304	0.464507	-3.32189	0.000894094	0.00593215
XLOC_067078	24.4031	-1.53904	0.450225	-3.41838	0.000629961	0.00435032
XLOC_061997	37.8832	-1.53902	0.366877	-4.19492	2.72962e-05	0.000252817
XLOC_025965	31.9767	-1.53448	0.567086	-2.70591	0.00681177	0.0346191
XLOC_019681	6223.6	-1.53405	0.211657	-7.24781	4.23564e-13	1.03804e-11	Greb1l
XLOC_056055	17.1878	-1.53349	0.52207	-2.93733	0.0033105	0.0186768
XLOC_057171	690.121	-1.53033	0.169256	-9.04153	1.54496e-19	6.10246e-18
XLOC_031860	22.0511	-1.52794	0.46865	-3.26031	0.0011129	0.00721411	unknown
XLOC_016655	211.545	-1.52771	0.247871	-6.16334	7.12284e-10	1.24941e-08	SIRT3
XLOC_000903	86.7318	-1.52421	0.310619	-4.90701	9.24763e-07	1.08302e-05
XLOC_013645	56.9795	-1.52397	0.419256	-3.63493	0.000278059	0.00209823
XLOC_027340	45.376	-1.52218	0.334354	-4.55259	5.29892e-06	5.52874e-05	EXOSC10
XLOC_029972	18.9633	-1.52189	0.499351	-3.04774	0.00230568	0.013706
XLOC_069582	254.653	-1.52121	0.232598	-6.54008	6.14848e-11	1.20656e-09
XLOC_008860	61.8821	-1.51886	0.307052	-4.94659	7.5523e-07	8.94927e-06
XLOC_040837	16.7541	-1.51862	0.562508	-2.69973	0.00693963	0.0351282
XLOC_024080	103.155	-1.51818	0.28441	-5.33799	9.39824e-08	1.26088e-06	RAB29
XLOC_000218	16.0362	-1.51704	0.534744	-2.83695	0.00455473	0.0246437	Plscr3
XLOC_005077	22.4892	-1.51653	0.484272	-3.13157	0.00173873	0.0106772
XLOC_048245	332.251	-1.51604	0.228313	-6.64019	3.13283e-11	6.353e-10	SEMA6A
XLOC_058565	47.4735	-1.51598	0.332958	-4.55307	5.28697e-06	5.51761e-05
XLOC_029483	3464.49	-1.50812	0.131212	-11.4937	1.41835e-30	1.03691e-28
XLOC_033435	20.3642	-1.50524	0.470052	-3.20228	0.00136344	0.0086294
XLOC_008778	20.4573	-1.5048	0.553461	-2.71889	0.00655015	0.0335026
XLOC_059089	35.2348	-1.50345	0.383169	-3.92372	8.71906e-05	0.000729259
XLOC_033509	30.4358	-1.50306	0.400754	-3.75059	0.000176418	0.0013901
XLOC_018581	3775.97	-1.5025	0.198763	-7.55925	4.054e-14	1.06688e-12	NGFR
XLOC_013400	14.701	-1.50118	0.542994	-2.76463	0.00569874	0.0297944
XLOC_006251	11.691	-1.5006	0.57512	-2.60919	0.00907577	0.043975
XLOC_024817	68.6861	-1.50024	0.30095	-4.98501	6.19594e-07	7.43023e-06	Vitamin
XLOC_013847	17.1156	-1.50017	0.514437	-2.91613	0.00354402	0.0198553
XLOC_057948	26.9977	-1.50005	0.484721	-3.09466	0.00197039	0.0119232
XLOC_050794	899.444	-1.49996	0.198856	-7.54293	4.59533e-14	1.20566e-12
XLOC_070160	359.58	-1.49613	0.563114	-2.65689	0.00788661	0.0391612
XLOC_054079	82.4127	-1.49509	0.276545	-5.4063	6.43392e-08	8.8296e-07	Gcnt1
XLOC_063178	336.865	-1.49334	0.191149	-7.81246	5.60811e-15	1.58204e-13	RGS3
XLOC_025596	119.503	-1.49153	0.24289	-6.14075	8.21327e-10	1.43426e-08
XLOC_069442	21.8717	-1.48857	0.511705	-2.90903	0.0036255	0.0202458
XLOC_071363	42.3355	-1.48684	0.343857	-4.324	1.53229e-05	0.000148789
XLOC_060241	547.338	-1.48622	0.132708	-11.1991	4.11831e-29	2.80624e-27	D10Wsu102e
XLOC_057746	498.047	-1.48592	0.428997	-3.46372	0.000532768	0.00376042	PPP3R1
XLOC_057746	498.047	-1.48592	0.428997	-3.46372	0.000532768	0.00376042	PNO1
XLOC_009832	11.372	-1.48461	0.580178	-2.55889	0.0105007	0.0497777
XLOC_065816	9.75964	-1.48433	0.562095	-2.64072	0.00827311	0.0407638
XLOC_055511	18.0426	-1.48383	0.550316	-2.69633	0.00701084	0.0354055
XLOC_060788	10.0477	-1.48296	0.560839	-2.64418	0.008189	0.0404276
XLOC_066452	735.58	-1.4827	0.208928	-7.09674	1.27735e-12	2.96853e-11	PTK7
XLOC_024002	22.7891	-1.48253	0.433533	-3.41964	0.000627032	0.00433357	Fndc1
XLOC_048244	1110.03	-1.48205	0.14852	-9.97879	1.88747e-23	9.31492e-22	SEMA6A
XLOC_065035	14.4907	-1.47749	0.542545	-2.72325	0.00646427	0.033142
XLOC_003918	4240.24	-1.47744	0.178407	-8.28131	1.21828e-16	3.93912e-15	NTN3
XLOC_003918	4240.24	-1.47744	0.178407	-8.28131	1.21828e-16	3.93912e-15	NTN1
XLOC_024782	90.933	-1.47677	0.287979	-5.12805	2.9276e-07	3.66656e-06	GTSF1
XLOC_065744	131.274	-1.47662	0.25857	-5.71072	1.12498e-08	1.71281e-07	CDH2
XLOC_038015	501.425	-1.47521	0.176788	-8.34452	7.15041e-17	2.34896e-15	Cdkl1
XLOC_038015	501.425	-1.47521	0.176788	-8.34452	7.15041e-17	2.34896e-15	cdkl1
XLOC_021476	24.5838	-1.4741	0.437284	-3.37105	0.000748833	0.00507374
XLOC_032915	10.9373	-1.47378	0.55053	-2.67703	0.00742788	0.037237
XLOC_047093	71.568	-1.47239	0.327761	-4.49227	7.04673e-06	7.20082e-05
XLOC_014424	12.0179	-1.47218	0.54763	-2.68827	0.00718226	0.0361358
XLOC_023932	538.619	-1.47187	0.133147	-11.0545	2.08517e-28	1.38368e-26	unknown
XLOC_023932	538.619	-1.47187	0.133147	-11.0545	2.08517e-28	1.38368e-26	NUAK1
XLOC_046395	20.56	-1.47125	0.506596	-2.90419	0.003682	0.0205108	Ccdc151
XLOC_001864	1324.32	-1.46984	0.170803	-8.60546	7.60122e-18	2.66339e-16	INSC
XLOC_034606	17.6146	-1.46736	0.497611	-2.94881	0.00318995	0.0181042
XLOC_007968	18.8386	-1.46524	0.446593	-3.28094	0.00103463	0.0067647
XLOC_055840	18.6751	-1.46313	0.52554	-2.78405	0.00536852	0.028322
XLOC_047440	27.6427	-1.4604	0.450386	-3.24254	0.00118468	0.0076085
XLOC_034430	23.4102	-1.46028	0.453353	-3.22106	0.00127717	0.00813351
XLOC_025254	100.218	-1.45921	0.318851	-4.57645	4.72933e-06	4.97537e-05
XLOC_020112	484.238	-1.45898	0.196625	-7.42013	1.17007e-13	2.98103e-12
XLOC_006913	213.849	-1.45882	0.219187	-6.6556	2.82153e-11	5.7569e-10	RECK
XLOC_045349	210.014	-1.45532	0.168531	-8.6353	5.8574e-18	2.08627e-16
XLOC_062681	870.523	-1.4553	0.120081	-12.1194	8.33988e-34	6.9714e-32	RGS16
XLOC_063559	1151.38	-1.45221	0.144497	-10.0502	9.1718e-24	4.61619e-22
XLOC_005759	18.593	-1.45151	0.513885	-2.82457	0.00473434	0.0254717
XLOC_022233	3647.86	-1.45085	0.123467	-11.7509	6.9857e-32	5.38061e-30
XLOC_028227	15.9358	-1.44977	0.516772	-2.80544	0.00502487	0.026824
XLOC_009356	238.593	-1.44969	0.215743	-6.71952	1.82321e-11	3.7826e-10	MECR
XLOC_025685	32.4717	-1.44967	0.478096	-3.03218	0.00242792	0.0143163	col-99
XLOC_064835	130.04	-1.44952	0.213948	-6.7751	1.24321e-11	2.61704e-10
XLOC_060956	28.6895	-1.44932	0.492192	-2.94462	0.00323354	0.0183131	OLFM4
XLOC_071142	46.6818	-1.44825	0.478327	-3.02774	0.00246391	0.0144889
XLOC_044462	23.7255	-1.44475	0.412819	-3.49973	0.000465731	0.0033386
XLOC_030881	12.3594	-1.44429	0.558032	-2.58819	0.00964812	0.0463215
XLOC_049337	38.7765	-1.44342	0.460777	-3.13258	0.00173278	0.0106452
XLOC_050041	32.7327	-1.44321	0.401225	-3.59702	0.000321887	0.00238885	Stab2
XLOC_031072	364.205	-1.44271	0.273998	-5.26539	1.39893e-07	1.82848e-06	Sema4f
XLOC_031072	364.205	-1.44271	0.273998	-5.26539	1.39893e-07	1.82848e-06	Sema4c
XLOC_031072	364.205	-1.44271	0.273998	-5.26539	1.39893e-07	1.82848e-06	Aqp3
XLOC_065648	59.3921	-1.44217	0.372026	-3.87653	0.000105956	0.000871506
XLOC_038634	205.968	-1.44099	0.180619	-7.97804	1.4868e-15	4.41971e-14
XLOC_062954	11.4744	-1.44043	0.562337	-2.5615	0.0104221	0.0495083
XLOC_068504	2311.91	-1.44027	0.168807	-8.53202	1.43818e-17	4.95471e-16
XLOC_034298	336.017	-1.43982	0.241153	-5.97056	2.36443e-09	3.91948e-08	GA17800
XLOC_054323	27.1226	-1.43746	0.493541	-2.91256	0.00358485	0.02005
XLOC_036482	115.067	-1.43571	0.341587	-4.20307	2.63321e-05	0.000244781
XLOC_024740	926.01	-1.43462	0.183814	-7.80475	5.96183e-15	1.67635e-13
XLOC_030279	486.845	-1.43135	0.137041	-10.4447	1.54912e-25	8.68897e-24	unknown
XLOC_045752	500.017	-1.43066	0.191407	-7.47448	7.7508e-14	2.00069e-12	Filip1l
XLOC_057008	19.539	-1.43022	0.480585	-2.97599	0.00292045	0.0168002	zgc113413
XLOC_029049	147.832	-1.42852	0.229817	-6.21588	5.10368e-10	9.08531e-09
XLOC_059182	39.2209	-1.42836	0.41543	-3.43826	0.000585457	0.00407976	STX10
XLOC_056049	171.367	-1.42507	0.265652	-5.36443	8.1205e-08	1.10041e-06
XLOC_065794	24.4687	-1.42369	0.541314	-2.63006	0.00853697	0.0418288
XLOC_024167	599.511	-1.42258	0.155018	-9.17689	4.43712e-20	1.80723e-18
XLOC_041666	39.3234	-1.42239	0.349101	-4.07444	4.61259e-05	0.000407945	NPR2
XLOC_001736	21.8832	-1.41955	0.453848	-3.1278	0.0017612	0.0107952	Adcy3
XLOC_034386	31.3006	-1.41926	0.362835	-3.91158	9.16943e-05	0.000764113	Histone
XLOC_034386	31.3006	-1.41926	0.362835	-3.91158	9.16943e-05	0.000764113	H4-VIII
XLOC_048534	14.3717	-1.41925	0.539054	-2.63285	0.00846713	0.0415203	Agfg1
XLOC_066834	27.2529	-1.41791	0.450584	-3.14683	0.00165051	0.0102008
XLOC_006272	123.204	-1.41724	0.285359	-4.96652	6.81643e-07	8.12864e-06
XLOC_044246	29.744	-1.414	0.406748	-3.47636	0.000508265	0.0036117	MYO7A
XLOC_020633	59.5669	-1.40887	0.41042	-3.43276	0.000597479	0.00415059
XLOC_061596	21.6765	-1.40845	0.50753	-2.77511	0.00551827	0.0289596
XLOC_011655	19.3269	-1.40746	0.478881	-2.93906	0.00329214	0.018601	unknown
XLOC_008900	16.5322	-1.40716	0.476618	-2.95239	0.00315329	0.0179339
XLOC_063956	48.7998	-1.40542	0.382669	-3.67269	0.000240011	0.00183586
XLOC_006803	1598.41	-1.40407	0.160024	-8.77412	1.72242e-18	6.34984e-17	Cldn19
XLOC_014850	607.687	-1.40351	0.171831	-8.16795	3.13686e-16	9.82588e-15	COL13A1
XLOC_059186	173.317	-1.40114	0.178833	-7.83489	4.69242e-15	1.33069e-13
XLOC_062147	34.4704	-1.40055	0.378301	-3.70222	0.000213723	0.00165503
XLOC_066438	27.399	-1.40013	0.403486	-3.47008	0.000520312	0.00368576
XLOC_050057	107.274	-1.39967	0.226637	-6.17581	6.5823e-10	1.15695e-08
XLOC_027175	88.3136	-1.39874	0.302873	-4.61823	3.87022e-06	4.13819e-05
XLOC_067452	468.819	-1.39866	0.518934	-2.69526	0.00703346	0.0355031	S-antigen
XLOC_061629	40.5627	-1.39633	0.375658	-3.71702	0.000201589	0.00157008	cdh2
XLOC_000647	15.1414	-1.39587	0.540071	-2.5846	0.00974914	0.0467366
XLOC_072047	34.5216	-1.39288	0.485057	-2.87159	0.00408414	0.0224295
XLOC_011735	52.1139	-1.39249	0.307016	-4.53556	5.74521e-06	5.95979e-05
XLOC_014935	105.501	-1.39016	0.249376	-5.57454	2.48185e-08	3.61777e-07	unknown
XLOC_014935	105.501	-1.39016	0.249376	-5.57454	2.48185e-08	3.61777e-07	ARHGAP24
XLOC_004197	18.0917	-1.38766	0.514102	-2.69918	0.00695102	0.0351652
XLOC_000034	22.2503	-1.38682	0.447597	-3.09837	0.0019459	0.01179
XLOC_055075	46.8158	-1.38508	0.337501	-4.10394	4.06176e-05	0.000363477	Sdpr
XLOC_024604	444.752	-1.38484	0.145856	-9.49461	2.21027e-21	9.64935e-20	slc12a9
XLOC_020611	54.0318	-1.38424	0.320073	-4.32476	1.52699e-05	0.000148375	SUFU
XLOC_006900	99.6015	-1.38399	0.276275	-5.00946	5.45825e-07	6.58731e-06	ZNF385B
XLOC_067581	474.752	-1.3834	0.264465	-5.23093	1.68656e-07	2.17542e-06	PPP4C
XLOC_058611	18.9475	-1.38326	0.461995	-2.99411	0.00275248	0.0159531	unknown
XLOC_042256	279.472	-1.38305	0.190462	-7.26159	3.82554e-13	9.4021e-12	G2/mitotic-specific
XLOC_044496	19.1076	-1.38212	0.500902	-2.75926	0.00579316	0.0302087
XLOC_038623	1363.96	-1.37958	0.164136	-8.40511	4.27462e-17	1.42817e-15	mov10b.1
XLOC_053599	416.36	-1.37726	0.198042	-6.95436	3.54166e-12	7.88655e-11
XLOC_033051	65.9842	-1.37687	0.309965	-4.44203	8.91126e-06	8.97221e-05	TNNC2
XLOC_045223	16.8091	-1.37595	0.517681	-2.6579	0.00786281	0.0390677	Atf
XLOC_020690	24.423	-1.37497	0.478637	-2.87269	0.00406995	0.022363	unknown
XLOC_025085	31.1015	-1.37358	0.422851	-3.24837	0.00116069	0.00747001
XLOC_007590	52.8922	-1.37242	0.379197	-3.61927	0.00029544	0.00221275
XLOC_038120	9344.41	-1.37144	0.0945179	-14.5099	1.04892e-47	1.54413e-45	npm1
XLOC_034231	1443.56	-1.37073	0.153605	-8.92371	4.50929e-19	1.73971e-17	ITPKC
XLOC_034231	1443.56	-1.37073	0.153605	-8.92371	4.50929e-19	1.73971e-17	Itpka
XLOC_001919	71.946	-1.36977	0.327421	-4.18351	2.87046e-05	0.000264611	Parvb
XLOC_062559	103.76	-1.36749	0.279492	-4.89275	9.94377e-07	1.1592e-05	EXOSC10
XLOC_020432	191.081	-1.36726	0.282988	-4.83153	1.35485e-06	1.54723e-05	NKX6-1
XLOC_053556	37.2451	-1.36685	0.514326	-2.65755	0.00787105	0.0390996
XLOC_008385	255.589	-1.36668	0.188555	-7.24817	4.22442e-13	1.03647e-11	unknown
XLOC_008385	255.589	-1.36668	0.188555	-7.24817	4.22442e-13	1.03647e-11	UBE2Q2
XLOC_008385	255.589	-1.36668	0.188555	-7.24817	4.22442e-13	1.03647e-11	AGP9
XLOC_067522	94.8287	-1.36653	0.375472	-3.63949	0.000273178	0.00206429
XLOC_016846	137.942	-1.36396	0.273239	-4.99182	5.9813e-07	7.18839e-06	Brsk1
XLOC_027246	137.7	-1.3632	0.25765	-5.29092	1.21702e-07	1.60483e-06	slc46a1
XLOC_039521	3327.68	-1.36235	0.113867	-11.9643	5.46316e-33	4.42937e-31	Uncharacterized
XLOC_039521	3327.68	-1.36235	0.113867	-11.9643	5.46316e-33	4.42937e-31	PARS2
XLOC_058950	12.7521	-1.3601	0.526057	-2.58546	0.00972498	0.046649
XLOC_037832	24.6219	-1.35929	0.493352	-2.75521	0.00586549	0.0305072
XLOC_000071	793.903	-1.35863	0.175781	-7.72911	1.08305e-14	2.99265e-13
XLOC_064286	32.6622	-1.35733	0.37281	-3.64082	0.000271774	0.00205584
XLOC_029683	251.784	-1.35688	0.467218	-2.90416	0.00368246	0.0205108	unknown
XLOC_029683	251.784	-1.35688	0.467218	-2.90416	0.00368246	0.0205108	Kif26b
XLOC_056452	16.0632	-1.35465	0.518286	-2.6137	0.00895667	0.0434858
XLOC_062319	23.9632	-1.35398	0.434326	-3.11743	0.00182438	0.0111318
XLOC_037933	220.431	-1.35309	0.196744	-6.8774	6.0956e-12	1.32454e-10
XLOC_021664	1606.6	-1.35301	0.237914	-5.68696	1.29323e-08	1.95106e-07	Scnn1b
XLOC_066599	53.2271	-1.35091	0.329741	-4.09687	4.18772e-05	0.000373509	ycf2-A
XLOC_031838	409.707	-1.35035	0.225593	-5.98576	2.15379e-09	3.57995e-08	igf1-a
XLOC_062744	40.7563	-1.34827	0.372084	-3.62356	0.00029058	0.00218052
XLOC_052505	891.507	-1.34756	0.188426	-7.1517	8.57074e-13	2.03122e-11	Slc12a1
XLOC_056299	970.074	-1.34754	0.441923	-3.04928	0.00229394	0.0136513
XLOC_069774	125.524	-1.34727	0.218958	-6.15312	7.59724e-10	1.32938e-08
XLOC_000370	871.072	-1.34462	0.154105	-8.72535	2.65364e-18	9.65088e-17	Trps1
XLOC_043721	2116.33	-1.3441	0.12916	-10.4065	2.31531e-25	1.28694e-23	Tiam1
XLOC_032992	176.764	-1.34365	0.207532	-6.47446	9.51508e-11	1.83139e-09	unknown
XLOC_032992	176.764	-1.34365	0.207532	-6.47446	9.51508e-11	1.83139e-09	Colgalt1
XLOC_032992	176.764	-1.34365	0.207532	-6.47446	9.51508e-11	1.83139e-09	CERCAM
XLOC_062055	120.422	-1.34328	0.23891	-5.62254	1.88172e-08	2.77675e-07
XLOC_050965	53.0519	-1.34303	0.299006	-4.49163	7.06799e-06	7.22083e-05
XLOC_056266	151.576	-1.33897	0.265553	-5.04221	4.60185e-07	5.6198e-06	unknown
XLOC_056266	151.576	-1.33897	0.265553	-5.04221	4.60185e-07	5.6198e-06	PHEX
XLOC_017609	347.686	-1.33873	0.181627	-7.37075	1.69673e-13	4.26734e-12	FGFRL1
XLOC_020464	389.432	-1.33853	0.156917	-8.5302	1.46101e-17	5.02935e-16	ANKRD1
XLOC_041651	32.0462	-1.33809	0.383891	-3.48559	0.000491059	0.00350097	unknown
XLOC_068385	46.4307	-1.33607	0.309818	-4.31243	1.61469e-05	0.000156123
XLOC_031867	76.3209	-1.33534	0.338084	-3.94974	7.82355e-05	0.000660249
XLOC_057693	27.1663	-1.33349	0.438763	-3.0392	0.00237204	0.0140405	P2RY1
XLOC_066556	260.751	-1.33316	0.514929	-2.58902	0.00962504	0.046221
XLOC_040212	37.0111	-1.33088	0.433968	-3.06676	0.00216393	0.0129616	unknown
XLOC_040212	37.0111	-1.33088	0.433968	-3.06676	0.00216393	0.0129616	TBATA
XLOC_068508	176.451	-1.32712	0.252963	-5.2463	1.5518e-07	2.01365e-06
XLOC_018352	16.7853	-1.32527	0.500943	-2.64556	0.00815569	0.040296
XLOC_031473	14.0924	-1.32452	0.500747	-2.64508	0.00816721	0.0403477
XLOC_044499	18.5718	-1.32336	0.463926	-2.85252	0.00433746	0.0236252
XLOC_058500	41.7238	-1.3224	0.375345	-3.52316	0.000426436	0.00308305
XLOC_023395	26.1961	-1.32121	0.449674	-2.93815	0.00330174	0.0186455
XLOC_002093	579.344	-1.32078	0.132967	-9.93313	2.98723e-23	1.46086e-21	GTSF1
XLOC_064889	64.0354	-1.31939	0.369611	-3.56966	0.000357438	0.00262468
XLOC_044177	40.5163	-1.31831	0.403912	-3.26385	0.00109908	0.00713631	DGKD
XLOC_059387	101.909	-1.31703	0.293862	-4.48179	7.40208e-06	7.54249e-05
XLOC_006278	40.792	-1.31571	0.418714	-3.14227	0.00167641	0.0103461
XLOC_063957	63.0342	-1.31469	0.306392	-4.29086	1.77984e-05	0.000170448
XLOC_016061	55.8899	-1.31459	0.297801	-4.41431	1.01334e-05	0.000100896
XLOC_018778	3101.51	-1.31236	0.10008	-13.113	2.77287e-39	2.99005e-37	rarga
XLOC_009138	31.0058	-1.30907	0.453652	-2.88563	0.00390629	0.0215819	TGFBR3
XLOC_056070	894.281	-1.30868	0.143871	-9.09617	9.35736e-20	3.73714e-18
XLOC_002315	951.08	-1.30792	0.166606	-7.85035	4.14881e-15	1.18432e-13
XLOC_031856	46.1401	-1.30777	0.461869	-2.83148	0.00463332	0.025003	unknown
XLOC_029479	19.1195	-1.30668	0.459644	-2.8428	0.00447193	0.0242291
XLOC_056058	176.287	-1.30653	0.271502	-4.81221	1.49268e-06	1.69878e-05
XLOC_029661	2675.64	-1.30401	0.122835	-10.616	2.51174e-26	1.48004e-24	BDKRB1
XLOC_013644	79.5741	-1.30355	0.358034	-3.64084	0.000271745	0.00205584
XLOC_055859	8894.53	-1.30287	0.109266	-11.9238	8.89326e-33	7.09044e-31	LARP4
XLOC_034215	109.594	-1.3026	0.231009	-5.63876	1.71283e-08	2.54231e-07	ARG2
XLOC_067752	33.6706	-1.30006	0.420621	-3.09081	0.00199614	0.0120706
XLOC_063486	111.41	-1.29988	0.339776	-3.82571	0.000130397	0.00105405
XLOC_069396	1728.8	-1.29899	0.194656	-6.67324	2.5022e-11	5.12962e-10
XLOC_070543	86.1522	-1.29841	0.366117	-3.54643	0.000390484	0.00284554
XLOC_012845	88.9872	-1.2984	0.366743	-3.54036	0.000399584	0.00290498
XLOC_044377	14.4315	-1.29796	0.49152	-2.64071	0.00827319	0.0407638
XLOC_018784	63.7061	-1.29732	0.39665	-3.2707	0.00107281	0.00698363
XLOC_022484	73.7395	-1.29516	0.286863	-4.51491	6.33434e-06	6.5223e-05
XLOC_051048	22.1026	-1.294	0.469942	-2.75352	0.00589574	0.0306534
XLOC_048133	16.0411	-1.28968	0.492457	-2.61887	0.00882208	0.0429629
XLOC_044679	29.4235	-1.2891	0.383999	-3.35703	0.000787837	0.00529971	Arhgef28
XLOC_048272	220.201	-1.28772	0.194553	-6.61887	3.61949e-11	7.29189e-10	lhfpl2
XLOC_062682	215.051	-1.28682	0.181124	-7.10462	1.2065e-12	2.81146e-11	RGS16
XLOC_032914	46.852	-1.28565	0.380934	-3.375	0.000738145	0.00500762
XLOC_053600	5816.56	-1.28535	0.130243	-9.86884	5.68189e-23	2.75677e-21	meis3-b
XLOC_053600	5816.56	-1.28535	0.130243	-9.86884	5.68189e-23	2.75677e-21	MEIS2
XLOC_053600	5816.56	-1.28535	0.130243	-9.86884	5.68189e-23	2.75677e-21	MEIS1
XLOC_049161	120.265	-1.28467	0.35057	-3.66451	0.000247811	0.00189116	NAPRT
XLOC_064247	25.9157	-1.28458	0.416223	-3.08628	0.00202675	0.0122346
XLOC_043761	135.993	-1.28422	0.217133	-5.91446	3.3297e-09	5.42428e-08
XLOC_022113	80.2941	-1.27834	0.290226	-4.40463	1.05966e-05	0.000105241
XLOC_047808	36.3337	-1.27686	0.40087	-3.18523	0.00144639	0.00909036
XLOC_006476	28.174	-1.27454	0.426668	-2.98719	0.00281554	0.0162683
XLOC_004945	51.5717	-1.27421	0.331688	-3.84161	0.000122232	0.000994014	KLF7
XLOC_004945	51.5717	-1.27421	0.331688	-3.84161	0.000122232	0.000994014	Klf7
XLOC_055680	29.4042	-1.27363	0.443463	-2.872	0.00407877	0.0224086
XLOC_013642	55.9877	-1.27235	0.337672	-3.76799	0.000164568	0.00130652
XLOC_068601	31.4128	-1.27161	0.396958	-3.20338	0.00135823	0.00859765
XLOC_006687	262.304	-1.26983	0.171025	-7.42479	1.12955e-13	2.88119e-12	ACVR1
XLOC_026309	154.109	-1.26892	0.226366	-5.60563	2.07501e-08	3.04738e-07
XLOC_040101	82.7264	-1.26721	0.374039	-3.38789	0.00070432	0.00480383	unknown
XLOC_033685	1253.52	-1.2668	0.232647	-5.44518	5.17526e-08	7.19614e-07	SP8
XLOC_052506	364.538	-1.26523	0.201042	-6.29334	3.107e-10	5.66179e-09	Slc12a1
XLOC_006853	571.654	-1.26515	0.245698	-5.14922	2.61578e-07	3.29999e-06	ITGB1
XLOC_067084	17.7903	-1.26283	0.467435	-2.70161	0.00690047	0.0349933
XLOC_067672	36.4622	-1.26206	0.386544	-3.26498	0.00109473	0.0071102
XLOC_006854	59.7105	-1.26195	0.313169	-4.0296	5.58723e-05	0.000485875	ITGB1
XLOC_051549	38.1734	-1.25981	0.411921	-3.05838	0.00222534	0.0132834
XLOC_054829	1182.38	-1.25934	0.120881	-10.4181	2.05114e-25	1.14452e-23
XLOC_019761	30.5732	-1.25852	0.421207	-2.9879	0.00280904	0.016237
XLOC_020565	42.8003	-1.25805	0.491557	-2.55933	0.0104875	0.0497323
XLOC_025461	155.543	-1.25802	0.220192	-5.71329	1.10813e-08	1.68893e-07	Rgl1
XLOC_048566	1706.05	-1.25618	0.0977097	-12.8562	7.93931e-38	7.98243e-36	Heph
XLOC_024623	135.82	-1.25577	0.239551	-5.2422	1.58675e-07	2.05653e-06	unknown
XLOC_034286	1843.12	-1.25491	0.114862	-10.9254	8.71997e-28	5.61371e-26	POLA2
XLOC_051678	80.0461	-1.25065	0.263919	-4.73878	2.15012e-06	2.39765e-05	TSPAN1
XLOC_061067	1919.64	-1.24843	0.164859	-7.57269	3.65585e-14	9.66641e-13
XLOC_054830	1602.53	-1.24793	0.129072	-9.66847	4.10467e-22	1.88148e-20	MAP3K4
XLOC_054830	1602.53	-1.24793	0.129072	-9.66847	4.10467e-22	1.88148e-20	Map3k4
XLOC_045336	22.4963	-1.24585	0.445919	-2.79389	0.00520779	0.0276159	Amhr2
XLOC_023287	102.612	-1.24368	0.390597	-3.18405	0.00145232	0.00912366	Spata4
XLOC_000550	32.5592	-1.24238	0.413313	-3.0059	0.00264794	0.0154176
XLOC_062054	40.8297	-1.24234	0.350737	-3.54209	0.000396964	0.00288837
XLOC_000015	32.5579	-1.2423	0.440718	-2.81882	0.00482007	0.0258813
XLOC_018872	479.991	-1.24205	0.162665	-7.63564	2.24704e-14	6.03496e-13	TNS1
XLOC_000534	93.6475	-1.24018	0.277654	-4.46663	7.9462e-06	8.05697e-05	htr2b
XLOC_071116	133.146	-1.23855	0.320322	-3.86658	0.000110373	0.00090491
XLOC_030341	465.812	-1.23716	0.145308	-8.51409	1.67907e-17	5.75703e-16	unknown
XLOC_031835	28.1132	-1.23422	0.428925	-2.87747	0.00400879	0.0220634
XLOC_061447	806.627	-1.23223	0.179785	-6.85393	7.18471e-12	1.55182e-10	Exosc10
XLOC_038897	2561.97	-1.23187	0.223458	-5.51276	3.53254e-08	5.04033e-07	Frmd4a
XLOC_021655	691.543	-1.23136	0.127417	-9.66396	4.28965e-22	1.96209e-20	Card14
XLOC_029446	63.3963	-1.2313	0.305792	-4.02661	5.65857e-05	0.000491682	NUMBL
XLOC_027939	25.5144	-1.22971	0.457953	-2.68524	0.00724787	0.0364367	Cyclic
XLOC_022880	36.0668	-1.22911	0.41645	-2.95139	0.00316349	0.0179777
XLOC_067754	32.8377	-1.22748	0.470867	-2.60686	0.00913764	0.044235
XLOC_044245	87.2563	-1.2272	0.264837	-4.63381	3.58997e-06	3.86054e-05	MYO7A
XLOC_032337	41.3045	-1.22678	0.353656	-3.46885	0.000522696	0.0037002
XLOC_024198	54.493	-1.22433	0.370386	-3.30554	0.000947931	0.00625089
XLOC_040097	2232.27	-1.2239	0.0965945	-12.6705	8.61659e-37	8.2044e-35	lamtor3
XLOC_040097	2232.27	-1.2239	0.0965945	-12.6705	8.61659e-37	8.2044e-35	GDF10
XLOC_013004	55.0395	-1.22266	0.476154	-2.56778	0.0102351	0.048749
XLOC_072140	63.9816	-1.22206	0.353708	-3.45499	0.000550307	0.00386712
XLOC_063061	231.74	-1.21937	0.182591	-6.67814	2.41988e-11	4.96897e-10	IMP4
XLOC_037567	3719.89	-1.2183	0.0963637	-12.6427	1.2273e-36	1.15583e-34	MSR1
XLOC_044500	38.4482	-1.21531	0.359985	-3.37599	0.000735499	0.0049928
XLOC_007006	1754.33	-1.21527	0.111818	-10.8683	1.63256e-27	1.031e-25	ACVR2B
XLOC_049259	59.4932	-1.21392	0.312224	-3.88799	0.000101077	0.000835204	unknown
XLOC_014974	125.509	-1.21338	0.281604	-4.30883	1.64119e-05	0.000158437	PALLD
XLOC_014974	125.509	-1.21338	0.281604	-4.30883	1.64119e-05	0.000158437	Mypn
XLOC_066345	175.382	-1.21319	0.240617	-5.04202	4.60652e-07	5.62392e-06
XLOC_006696	161.669	-1.21282	0.298925	-4.05729	4.96451e-05	0.000435941	RND2
XLOC_023914	3208.35	-1.21222	0.0895439	-13.5377	9.36819e-42	1.0921e-39	unknown
XLOC_023914	3208.35	-1.21222	0.0895439	-13.5377	9.36819e-42	1.0921e-39	PFKFB1
XLOC_023914	3208.35	-1.21222	0.0895439	-13.5377	9.36819e-42	1.0921e-39	Kin
XLOC_030353	34.3926	-1.21097	0.427253	-2.83432	0.0045923	0.0248127
XLOC_006469	1300.31	-1.20904	0.190644	-6.34185	2.2702e-10	4.2044e-09	FZD8
XLOC_011480	5617.52	-1.20835	0.114019	-10.5978	3.05092e-26	1.78314e-24	Plekhh2
XLOC_070535	38.3782	-1.2064	0.39699	-3.03886	0.00237474	0.0140507
XLOC_055222	53.1896	-1.20504	0.461267	-2.61246	0.00898926	0.0436137
XLOC_010426	2283.49	-1.2034	0.159179	-7.56001	4.03034e-14	1.0613e-12	unknown
XLOC_010426	2283.49	-1.2034	0.159179	-7.56001	4.03034e-14	1.0613e-12	Sall3
XLOC_060532	36.5475	-1.20232	0.422595	-2.84508	0.00444	0.0240984
XLOC_071470	375.245	-1.20127	0.166365	-7.22069	5.17227e-13	1.25617e-11
XLOC_066912	215.559	-1.19985	0.205112	-5.84974	4.92336e-09	7.87099e-08
XLOC_007064	42.1645	-1.19857	0.359914	-3.33015	0.000867982	0.00577936
XLOC_018607	5322.52	-1.19412	0.0972527	-12.2785	1.18121e-34	1.0272e-32	ARL4A
XLOC_057336	196.414	-1.19409	0.196187	-6.08646	1.15437e-09	1.9696e-08
XLOC_067523	448.464	-1.19319	0.164171	-7.26797	3.64935e-13	8.98957e-12	Exosc10
XLOC_013315	42.6834	-1.19022	0.321762	-3.69907	0.000216391	0.00167269
XLOC_000089	830.574	-1.18954	0.411985	-2.88735	0.00388506	0.0214866	PLEC
XLOC_000089	830.574	-1.18954	0.411985	-2.88735	0.00388506	0.0214866	MACF1
XLOC_000089	830.574	-1.18954	0.411985	-2.88735	0.00388506	0.0214866	Macf1
XLOC_062654	283.291	-1.18849	0.224461	-5.29487	1.19101e-07	1.57534e-06	unknown
XLOC_062268	419.15	-1.18643	0.18704	-6.34319	2.25057e-10	4.17162e-09
XLOC_071535	182.666	-1.18616	0.228699	-5.18655	2.14229e-07	2.72899e-06
XLOC_005414	11443.4	-1.18464	0.113278	-10.4578	1.34925e-25	7.59752e-24	SALL2
XLOC_011861	1108.69	-1.18437	0.108107	-10.9556	6.24759e-28	4.07681e-26	FRMD1
XLOC_033756	3007.8	-1.18384	0.0971505	-12.1856	3.70711e-34	3.16631e-32	ZNF148
XLOC_010634	261.385	-1.1832	0.286514	-4.12964	3.63334e-05	0.000327931	DOK4
XLOC_056084	170.972	-1.18258	0.26209	-4.51212	6.41835e-06	6.59778e-05
XLOC_000433	200.319	-1.18199	0.290167	-4.07347	4.63184e-05	0.000409395
XLOC_053762	14669.3	-1.18177	0.204195	-5.78745	7.14617e-09	1.11761e-07	MAPK8IP1
XLOC_053762	14669.3	-1.18177	0.204195	-5.78745	7.14617e-09	1.11761e-07	Mapk8ip1
XLOC_053762	14669.3	-1.18177	0.204195	-5.78745	7.14617e-09	1.11761e-07	Celf2
XLOC_060644	181.409	-1.18058	0.205964	-5.73196	9.92776e-09	1.52552e-07
XLOC_026143	28.6999	-1.17844	0.40916	-2.88015	0.0039749	0.0219048
XLOC_001853	28.535	-1.17839	0.431382	-2.73167	0.00630141	0.0324497
XLOC_068600	18.6526	-1.17837	0.448942	-2.62476	0.00867106	0.0423342
XLOC_020490	30.4202	-1.17704	0.417173	-2.82146	0.00478051	0.0256944
XLOC_071469	157.443	-1.17525	0.243593	-4.82464	1.40253e-06	1.59956e-05
XLOC_028480	18.6479	-1.17476	0.439729	-2.67155	0.00755022	0.0377581	Als2
XLOC_061439	437.463	-1.17236	0.198861	-5.89539	3.73799e-09	6.05448e-08
XLOC_057711	828.628	-1.16835	0.128692	-9.07863	1.09949e-19	4.37492e-18	slc25a30
XLOC_071595	20.0748	-1.16826	0.444419	-2.62874	0.00857014	0.0419332
XLOC_061718	49.6093	-1.16788	0.448865	-2.60185	0.0092722	0.0447959	Glycine%2C
XLOC_003266	3664.54	-1.16693	0.10299	-11.3305	9.26461e-30	6.50831e-28
XLOC_035943	34.9714	-1.16606	0.429638	-2.71405	0.00664663	0.0339076	GAS2L1
XLOC_035943	34.9714	-1.16606	0.429638	-2.71405	0.00664663	0.0339076	Gas2l1
XLOC_022359	269.019	-1.16601	0.218923	-5.32614	1.00322e-07	1.33968e-06	wtip
XLOC_065996	58.6859	-1.16078	0.382298	-3.03632	0.00239488	0.0141504
XLOC_033593	110.746	-1.16051	0.270885	-4.28413	1.83457e-05	0.000175378	unknown
XLOC_033593	110.746	-1.16051	0.270885	-4.28413	1.83457e-05	0.000175378	MIB
XLOC_050056	261.483	-1.15992	0.217276	-5.33846	9.37391e-08	1.25801e-06	GATA2
XLOC_030845	50.9471	-1.15916	0.412877	-2.80752	0.00499238	0.0266803
XLOC_018557	3207.99	-1.15855	0.111298	-10.4095	2.24473e-25	1.24931e-23	hox-beta1
XLOC_015621	1627.73	-1.15695	0.125391	-9.22673	2.79021e-20	1.14619e-18	C15orf39
XLOC_006276	91.7352	-1.15631	0.337125	-3.42993	0.000603746	0.00419008
XLOC_055979	78.7354	-1.15575	0.279738	-4.13157	3.60298e-05	0.00032546	NR2E1
XLOC_003406	107.422	-1.15514	0.291223	-3.96651	7.29337e-05	0.000620116	BEST2
XLOC_031018	35.7162	-1.15471	0.42455	-2.71983	0.00653146	0.0334189
XLOC_037397	45.6431	-1.15449	0.324506	-3.5577	0.000374113	0.00273355	PLEC
XLOC_045220	45.9916	-1.15446	0.382693	-3.01667	0.0025557	0.0149573	ABCB1
XLOC_047857	94.6797	-1.14947	0.289188	-3.97481	7.04345e-05	0.000600881	unknown
XLOC_047857	94.6797	-1.14947	0.289188	-3.97481	7.04345e-05	0.000600881	Tgm1
XLOC_047857	94.6797	-1.14947	0.289188	-3.97481	7.04345e-05	0.000600881	ST6GALNAC2
XLOC_047857	94.6797	-1.14947	0.289188	-3.97481	7.04345e-05	0.000600881	RUNX1T1
XLOC_071176	234.315	-1.14866	0.242167	-4.74324	2.10323e-06	2.3484e-05
XLOC_049654	58.5343	-1.1484	0.334851	-3.42959	0.000604503	0.00419399
XLOC_031858	46.0016	-1.14803	0.40952	-2.80336	0.0050573	0.0269504
XLOC_017616	228.354	-1.14431	0.322716	-3.54587	0.000391322	0.00285068	Htra1
XLOC_070768	368.25	-1.14136	0.175994	-6.48526	8.85818e-11	1.70953e-09
XLOC_038931	817.034	-1.14075	0.141591	-8.05671	7.83736e-16	2.37561e-14	ARHGEF3
XLOC_003636	120.899	-1.14001	0.349547	-3.2614	0.00110864	0.00718976	unknown
XLOC_051488	1728.27	-1.13966	0.174385	-6.53528	6.34886e-11	1.24249e-09
XLOC_066371	34.8148	-1.13733	0.371209	-3.06385	0.00218509	0.0130721
XLOC_065649	250.314	-1.13728	0.183905	-6.18405	6.24768e-10	1.10172e-08
XLOC_027153	78.3343	-1.13625	0.297063	-3.82496	0.000130793	0.00105685	Arhgef17
XLOC_029048	33.9053	-1.13579	0.413863	-2.74437	0.00606269	0.0314041
XLOC_021360	48.2295	-1.13347	0.370274	-3.06117	0.00220474	0.0131732	TECTA
XLOC_036065	99.25	-1.13297	0.329577	-3.43764	0.000586812	0.00408637	TEX14
XLOC_036065	99.25	-1.13297	0.329577	-3.43764	0.000586812	0.00408637	GIT2
XLOC_020203	30.0641	-1.13106	0.409645	-2.76108	0.00576112	0.0300841
XLOC_036072	30.2665	-1.13011	0.440156	-2.56753	0.0102426	0.048774
XLOC_040819	66.748	-1.12706	0.304441	-3.70205	0.000213867	0.00165585	srgap2
XLOC_051055	49.2345	-1.12499	0.304429	-3.6954	0.000219544	0.00169433
XLOC_023441	63.3068	-1.12448	0.394009	-2.85395	0.00431789	0.0235304
XLOC_069840	22.7949	-1.12395	0.421903	-2.664	0.00772185	0.0384759	unknown
XLOC_062689	539.797	-1.12297	0.148907	-7.54143	4.64832e-14	1.21882e-12
XLOC_034462	74.6387	-1.12153	0.337186	-3.32615	0.000880554	0.00585042	DNAL1
XLOC_029550	601.423	-1.12137	0.251712	-4.45497	8.39031e-06	8.48334e-05
XLOC_037196	46.4153	-1.12058	0.32071	-3.49407	0.000475722	0.0034011
XLOC_067395	52.4916	-1.11925	0.399336	-2.80277	0.00506659	0.0269966
XLOC_052246	37.0066	-1.11921	0.378226	-2.95911	0.0030853	0.017589
XLOC_070738	908.687	-1.11865	0.195271	-5.7287	1.012e-08	1.55341e-07
XLOC_019741	44.0182	-1.11803	0.343243	-3.25727	0.0011249	0.00727876
XLOC_046800	3293.77	-1.11781	0.113961	-9.8087	1.03291e-22	4.93929e-21
XLOC_003291	14626.6	-1.11725	0.104352	-10.7066	9.48078e-27	5.75154e-25	CAD
XLOC_068795	111.077	-1.11621	0.372186	-2.99906	0.0027081	0.0157212	RpI1
XLOC_037580	40.4133	-1.11498	0.389458	-2.8629	0.00419779	0.0229688	CPA6
XLOC_043767	40.8699	-1.11415	0.43079	-2.58629	0.00970156	0.046547	unknown
XLOC_062053	1802.45	-1.11407	0.129739	-8.58706	8.92268e-18	3.11882e-16
XLOC_063958	192.642	-1.11329	0.196769	-5.65788	1.5325e-08	2.28645e-07
XLOC_007995	1798.74	-1.11311	0.153771	-7.23879	4.5271e-13	1.10508e-11	unknown
XLOC_007995	1798.74	-1.11311	0.153771	-7.23879	4.5271e-13	1.10508e-11	FAM189A1
XLOC_007995	1798.74	-1.11311	0.153771	-7.23879	4.5271e-13	1.10508e-11	Fam189a1
XLOC_009563	41.3079	-1.11193	0.364323	-3.05205	0.00227287	0.013539	slc43a2
XLOC_051462	33.554	-1.11151	0.376346	-2.95344	0.00314255	0.0178823
XLOC_024734	95.65	-1.11138	0.269541	-4.12322	3.73611e-05	0.00033657
XLOC_060351	95.4352	-1.11122	0.297032	-3.74107	0.00018324	0.0014386	SLC39A6
XLOC_050900	385.987	-1.11094	0.149649	-7.42366	1.13927e-13	2.90428e-12
XLOC_054347	896.803	-1.10989	0.253231	-4.38289	1.17115e-05	0.00011549	unknown
XLOC_029534	158.44	-1.10941	0.279303	-3.97208	7.12492e-05	0.000607111	unknown
XLOC_020840	131.091	-1.10744	0.2349	-4.7145	2.42307e-06	2.68605e-05
XLOC_003692	37.1789	-1.10737	0.364339	-3.0394	0.0023705	0.0140353	ARHGAP6
XLOC_062037	1623.91	-1.10508	0.138252	-7.99324	1.31442e-15	3.92625e-14
XLOC_023049	43.8265	-1.1036	0.322012	-3.42719	0.000609861	0.00422776	spata18
XLOC_065209	1166.54	-1.10228	0.142109	-7.75661	8.72293e-15	2.42987e-13
XLOC_029058	56.8531	-1.10223	0.39645	-2.78025	0.00543164	0.028592
XLOC_058215	542.742	-1.10222	0.163649	-6.73524	1.63655e-11	3.40846e-10
XLOC_037534	2273.67	-1.10016	0.104213	-10.5568	4.72604e-26	2.7289e-24	SULF2
XLOC_037534	2273.67	-1.10016	0.104213	-10.5568	4.72604e-26	2.7289e-24	SULF1
XLOC_053613	122.615	-1.1	0.223251	-4.92717	8.34281e-07	9.82929e-06
XLOC_040833	568.513	-1.09744	0.204729	-5.36048	8.30029e-08	1.12266e-06	SIRT5
XLOC_029595	98.986	-1.09488	0.235795	-4.64336	3.42794e-06	3.69551e-05
XLOC_010329	2367.59	-1.09452	0.102369	-10.6918	1.11145e-26	6.69554e-25	SLC7A5
XLOC_010329	2367.59	-1.09452	0.102369	-10.6918	1.11145e-26	6.69554e-25	Slc7a5
XLOC_031104	37.5358	-1.09376	0.416288	-2.62741	0.0086038	0.0420614
XLOC_040832	2197.32	-1.09205	0.206405	-5.29079	1.21787e-07	1.60545e-06
XLOC_000273	192.642	-1.08992	0.199089	-5.47455	4.38625e-08	6.16261e-07	unknown
XLOC_037393	965.599	-1.0891	0.243759	-4.46796	7.89677e-06	8.01439e-05	epi-1
XLOC_044134	846.807	-1.08886	0.239501	-4.54637	5.45786e-06	5.67399e-05	zic1
XLOC_044134	846.807	-1.08886	0.239501	-4.54637	5.45786e-06	5.67399e-05	Pou4f1
XLOC_042648	491.715	-1.08793	0.22135	-4.91497	8.87963e-07	1.04191e-05	DHRS3
XLOC_064676	138.369	-1.08771	0.193027	-5.635	1.75057e-08	2.59473e-07
XLOC_037593	162.638	-1.08533	0.210716	-5.15066	2.59576e-07	3.27568e-06	unknown
XLOC_065065	196.044	-1.08438	0.224298	-4.83455	1.33449e-06	1.5264e-05
XLOC_001934	13925.4	-1.08389	0.101601	-10.6682	1.43442e-26	8.58128e-25	ccnd2
XLOC_009450	44.6821	-1.08373	0.377842	-2.86821	0.00412807	0.0226477	unknown
XLOC_064264	651.413	-1.08308	0.240855	-4.49682	6.89767e-06	7.06021e-05
XLOC_018693	3836.67	-1.08265	0.123961	-8.73381	2.46229e-18	8.9701e-17
XLOC_016838	5912.86	-1.08228	0.101779	-10.6336	2.07921e-26	1.23529e-24	Opn1sw
XLOC_016838	5912.86	-1.08228	0.101779	-10.6336	2.07921e-26	1.23529e-24	Nat10
XLOC_049243	3937.54	-1.08137	0.149064	-7.25445	4.03285e-13	9.90597e-12	C1orf21
XLOC_035351	173.896	-1.08003	0.222724	-4.84919	1.23968e-06	1.42552e-05	CASKIN1
XLOC_044135	2203.11	-1.07884	0.1059	-10.1873	2.25944e-24	1.17701e-22
XLOC_062056	447.594	-1.07809	0.1992	-5.41211	6.22872e-08	8.56708e-07	LRRC8C
XLOC_052042	68.6025	-1.07786	0.38284	-2.81544	0.004871	0.0261157
XLOC_009577	35.9207	-1.07768	0.381978	-2.82131	0.00478275	0.0257033
XLOC_064265	59.1866	-1.07532	0.311148	-3.45597	0.000548311	0.00385498
XLOC_002024	77.5054	-1.07346	0.291513	-3.68239	0.000231057	0.0017746	CLU
XLOC_022499	458.772	-1.07184	0.163965	-6.53705	6.27454e-11	1.22906e-09	Slc7a8
XLOC_045867	66.261	-1.07171	0.359414	-2.98183	0.00286532	0.0165293	CENPJ
XLOC_028007	2767.89	-1.06964	0.109708	-9.74986	1.84716e-22	8.72658e-21	Rrp9
XLOC_023906	480.799	-1.06851	0.14948	-7.14818	8.79367e-13	2.07948e-11	LRRN2
XLOC_037886	69.1065	-1.06679	0.290619	-3.67074	0.000241851	0.00184829	Mark2
XLOC_066994	508.815	-1.06623	0.160784	-6.63144	3.32436e-11	6.71928e-10	DVL3
XLOC_042229	283.795	-1.06612	0.20231	-5.26974	1.36617e-07	1.78837e-06	Ccdc88c
XLOC_005477	32.8807	-1.06487	0.3972	-2.68094	0.0073416	0.0368687
XLOC_024861	894.734	-1.06438	0.147906	-7.19635	6.18472e-13	1.48533e-11	PPAP2C
XLOC_024861	894.734	-1.06438	0.147906	-7.19635	6.18472e-13	1.48533e-11	Ppap2b
XLOC_024064	1904.59	-1.0637	0.108657	-9.78952	1.24884e-22	5.93893e-21	impdh1b
XLOC_024064	1904.59	-1.0637	0.108657	-9.78952	1.24884e-22	5.93893e-21	impdh1a
XLOC_024064	1904.59	-1.0637	0.108657	-9.78952	1.24884e-22	5.93893e-21	IMPDH1
XLOC_001378	62.6587	-1.06198	0.295063	-3.59914	0.000319265	0.00237061
XLOC_046294	370.232	-1.06157	0.190122	-5.58364	2.3554e-08	3.43925e-07
XLOC_050466	65.3202	-1.06072	0.353802	-2.99805	0.00271717	0.0157654
XLOC_003719	903.262	-1.05873	0.139156	-7.60822	2.77891e-14	7.42184e-13	Fam195a
XLOC_032436	71.7474	-1.05844	0.348745	-3.03501	0.0024053	0.0142043
XLOC_038466	57.2128	-1.05834	0.323048	-3.27612	0.00105245	0.00686349
XLOC_044172	195.818	-1.05778	0.363034	-2.91371	0.00357164	0.0199865	tf
XLOC_013801	279.664	-1.05759	0.272193	-3.88543	0.00010215	0.000843258	ALOX5
XLOC_003317	86.6356	-1.05712	0.24838	-4.25606	2.08058e-05	0.000196975
XLOC_017796	77.5262	-1.05669	0.358561	-2.94703	0.00320842	0.0181971	ATP6V1B2
XLOC_070003	195.557	-1.05442	0.228448	-4.61559	3.91989e-06	4.18594e-05
XLOC_050471	8523.14	-1.05358	0.182026	-5.78808	7.11943e-09	1.11423e-07	Fat2
XLOC_050471	8523.14	-1.05358	0.182026	-5.78808	7.11943e-09	1.11423e-07	FAT1
XLOC_056043	117.501	-1.05284	0.26244	-4.01174	6.02733e-05	0.000521413	MGAT5B
XLOC_036174	56.536	-1.05228	0.286065	-3.67847	0.000234633	0.00179983	Foxn4
XLOC_069970	90.6942	-1.05046	0.269169	-3.90261	9.51592e-05	0.000790543
XLOC_055557	1988.37	-1.04938	0.158011	-6.64116	3.1122e-11	6.31413e-10	Imp3
XLOC_025695	400.171	-1.04712	0.184983	-5.66061	1.50839e-08	2.2536e-07	PRRX1
XLOC_063400	228.711	-1.04699	0.184979	-5.66005	1.51333e-08	2.26019e-07	unknown
XLOC_063400	228.711	-1.04699	0.184979	-5.66005	1.51333e-08	2.26019e-07	Uncharacterized
XLOC_016947	193.943	-1.0468	0.194069	-5.39395	6.89247e-08	9.41396e-07
XLOC_003723	3282.72	-1.04643	0.10795	-9.69359	3.21028e-22	1.48413e-20	Map2k6
XLOC_003723	3282.72	-1.04643	0.10795	-9.69359	3.21028e-22	1.48413e-20	KCNJ12
XLOC_070345	5304.26	-1.04581	0.160555	-6.51375	7.32982e-11	1.42606e-09
XLOC_030999	419.698	-1.04522	0.160802	-6.50006	8.02854e-11	1.55638e-09	SLC12A3
XLOC_030999	419.698	-1.04522	0.160802	-6.50006	8.02854e-11	1.55638e-09	SLC12A2
XLOC_065670	50.6289	-1.04393	0.327828	-3.18439	0.00145059	0.0091141
XLOC_010315	440.598	-1.04369	0.147874	-7.05794	1.68992e-12	3.88753e-11	Mettl17
XLOC_028828	57.0225	-1.0435	0.322819	-3.23247	0.00122723	0.0078514
XLOC_049159	10211	-1.04001	0.164795	-6.31093	2.77359e-10	5.09077e-09	IVNS1ABP
XLOC_009451	41.3656	-1.03965	0.348181	-2.98596	0.00282689	0.0163295
XLOC_013692	9040.97	-1.03832	0.12374	-8.3912	4.81218e-17	1.60529e-15	nhp2l1
XLOC_008243	1481.75	-1.0382	0.120139	-8.64168	5.53933e-18	1.97461e-16	Sema4c
XLOC_061268	238.196	-1.03787	0.226242	-4.58742	4.48761e-06	4.74305e-05	unknown
XLOC_051484	58.8259	-1.03743	0.302374	-3.43097	0.000601438	0.00417676
XLOC_042646	1255.37	-1.03712	0.135848	-7.6344	2.2688e-14	6.08204e-13	PHF13
XLOC_029428	7388.85	-1.03687	0.152784	-6.78651	1.14878e-11	2.42655e-10	ZNF106
XLOC_070865	82.0236	-1.03677	0.281694	-3.6805	0.00023278	0.00178688
XLOC_040190	1353.58	-1.03645	0.225113	-4.60415	4.14164e-06	4.40546e-05	Bmpr1a
XLOC_034763	44.9657	-1.03635	0.405259	-2.55725	0.0105502	0.0499738
XLOC_056280	37.3015	-1.03623	0.377231	-2.74695	0.00601532	0.0312075	Bag6
XLOC_011316	28.5708	-1.03559	0.382395	-2.70816	0.00676568	0.0344214
XLOC_039509	4200.52	-1.03507	0.108206	-9.56575	1.11393e-21	4.99449e-20	Ror1
XLOC_039509	4200.52	-1.03507	0.108206	-9.56575	1.11393e-21	4.99449e-20	JAK2
XLOC_020642	4995.84	-1.0338	0.11159	-9.26425	1.96453e-20	8.17129e-19	PPARGC1A
XLOC_011843	861.637	-1.03365	0.147513	-7.00718	2.43166e-12	5.50288e-11	Mgme1
XLOC_037498	46.0885	-1.03187	0.336046	-3.07062	0.00213617	0.0128168
XLOC_045191	909.527	-1.03183	0.185611	-5.55911	2.71156e-08	3.93004e-07
XLOC_060079	42.9387	-1.02972	0.342343	-3.00787	0.00263082	0.0153345
XLOC_062802	173.772	-1.02941	0.226204	-4.5508	5.34433e-06	5.56628e-05
XLOC_042725	9623.66	-1.02864	0.153228	-6.71312	1.90511e-11	3.94683e-10
XLOC_058694	66.7976	-1.02829	0.311394	-3.30221	0.000959279	0.00631897	unknown
XLOC_058694	66.7976	-1.02829	0.311394	-3.30221	0.000959279	0.00631897	Mettl20
XLOC_066749	2815.1	-1.02815	0.131371	-7.82634	5.02279e-15	1.42157e-13	B3GNT3
XLOC_051695	68.8179	-1.02663	0.327726	-3.1326	0.00173265	0.0106452	ATP2A1
XLOC_016868	98.2941	-1.02661	0.359524	-2.85547	0.00429737	0.0234453
XLOC_038627	2648.07	-1.02628	0.145682	-7.04466	1.85914e-12	4.26219e-11	FAM212B
XLOC_008229	1525.64	-1.02591	0.136709	-7.50434	6.17382e-14	1.60709e-12	MLLT3
XLOC_028888	38.3541	-1.02563	0.364894	-2.81077	0.0049423	0.0264552
XLOC_068273	410.597	-1.02457	0.291636	-3.51316	0.00044281	0.00318913	unknown
XLOC_022853	129.267	-1.02236	0.253575	-4.03179	5.53537e-05	0.000481886
XLOC_044133	2599.53	-1.02235	0.171994	-5.94411	2.77968e-09	4.57094e-08	zic1
XLOC_044133	2599.53	-1.02235	0.171994	-5.94411	2.77968e-09	4.57094e-08	Pou4f1
XLOC_034533	3923.16	-1.02222	0.0962109	-10.6247	2.28659e-26	1.35663e-24	RHOU
XLOC_062052	1129.97	-1.0217	0.125061	-8.16963	3.09334e-16	9.70364e-15
XLOC_000186	864.841	-1.02133	0.143284	-7.12801	1.01828e-12	2.39354e-11
XLOC_028709	312.911	-1.02107	0.172914	-5.90505	3.52538e-09	5.72086e-08	mettl10
XLOC_013581	2403.13	-1.02089	0.104946	-9.72773	2.29666e-22	1.07442e-20	ext1a
XLOC_013581	2403.13	-1.02089	0.104946	-9.72773	2.29666e-22	1.07442e-20	Ext1
XLOC_031249	45.4335	-1.02047	0.354318	-2.88008	0.00397571	0.0219065
XLOC_060146	366.513	-1.01559	0.147977	-6.86319	6.7338e-12	1.45954e-10	PDCD2L
XLOC_048553	189.513	-1.01512	0.200408	-5.06525	4.07862e-07	5.01348e-06	PROS1
XLOC_003845	1670.53	-1.01392	0.123624	-8.20169	2.37039e-16	7.51778e-15	RPTOR
XLOC_026165	45.8949	-1.0139	0.395023	-2.56668	0.0102676	0.0488792
XLOC_016786	58.0131	-1.01373	0.37278	-2.71939	0.00654022	0.0334598
XLOC_039325	466.19	-1.01338	0.199047	-5.09116	3.55878e-07	4.40715e-06	NFIA
XLOC_039325	466.19	-1.01338	0.199047	-5.09116	3.55878e-07	4.40715e-06	infB
XLOC_031251	1676.48	-1.01176	0.138126	-7.32491	2.39065e-13	5.96391e-12
XLOC_024630	1329.57	-1.01042	0.172044	-5.87305	4.27845e-09	6.88591e-08	Acot11
XLOC_053369	502.123	-1.00988	0.150605	-6.70547	2.00761e-11	4.14129e-10	unknown
XLOC_062536	56.8191	-1.0098	0.352698	-2.86308	0.00419542	0.0229588
XLOC_002877	25.9343	-1.00977	0.389256	-2.59409	0.00948403	0.0456505
XLOC_067648	66.1593	-1.00829	0.282934	-3.56371	0.000365654	0.00267771	unknown
XLOC_036863	1458.35	-1.00732	0.104335	-9.6546	4.7e-22	2.14751e-20	EPHB2
XLOC_036863	1458.35	-1.00732	0.104335	-9.6546	4.7e-22	2.14751e-20	Ephb2
XLOC_017902	37.452	-1.00606	0.392741	-2.56163	0.0104183	0.0494956	VIM
XLOC_018783	3890.69	-1.00403	0.0975515	-10.2923	7.63021e-25	4.10879e-23	FZD2
XLOC_038732	81.372	-1.00244	0.294181	-3.40757	0.00065543	0.004506
XLOC_059239	1041.32	-1.00233	0.139488	-7.1858	6.68154e-13	1.59753e-11	lpar1-b
XLOC_050617	1004.79	-1.00183	0.146757	-6.82644	8.70467e-12	1.86147e-10	unknown
XLOC_028062	68.8569	-1.00011	0.276367	-3.61877	0.000296011	0.00221607
XLOC_037394	15596.8	-1.00007	0.116638	-8.57416	9.98151e-18	3.46366e-16	epi-1
XLOC_019986	37.8797	-0.998108	0.343639	-2.90453	0.0036781	0.0204944
XLOC_070770	88.4115	-0.997881	0.273117	-3.65367	0.00025852	0.00196558
XLOC_072069	62.754	-0.996063	0.301069	-3.30843	0.00093822	0.00619254
XLOC_039523	45.3946	-0.995513	0.3688	-2.69933	0.0069479	0.0351576	unknown
XLOC_006270	38.7493	-0.993955	0.349209	-2.8463	0.00442304	0.0240245
XLOC_050994	117467	-0.992217	0.100341	-9.88845	4.67227e-23	2.27203e-21	ncl
XLOC_068085	177.335	-0.991717	0.28417	-3.48987	0.000483255	0.00344989	unknown
XLOC_069659	532.886	-0.991278	0.185468	-5.34474	9.05479e-08	1.21914e-06
XLOC_072119	275.281	-0.991092	0.218273	-4.54061	5.60908e-06	5.82278e-05
XLOC_014018	4271.87	-0.991055	0.100818	-9.83013	8.35075e-23	4.0066e-21	myadm
XLOC_003803	42.3697	-0.989956	0.345526	-2.86507	0.00416923	0.0228328
XLOC_067803	160.87	-0.989494	0.217271	-4.55419	5.25886e-06	5.49093e-05
XLOC_031199	274.576	-0.988558	0.239213	-4.13253	3.58784e-05	0.000324297
XLOC_057699	2301	-0.987796	0.173123	-5.70575	1.15834e-08	1.76111e-07
XLOC_052945	54.6208	-0.987535	0.352607	-2.80067	0.00509969	0.0271361
XLOC_050395	35.6769	-0.987121	0.360012	-2.74191	0.00610824	0.0316097
XLOC_013695	174.985	-0.986617	0.238192	-4.14211	3.44131e-05	0.000311967	MYADML2
XLOC_004143	32.1073	-0.986555	0.375457	-2.62761	0.0085986	0.0420455
XLOC_046300	167.942	-0.985821	0.212256	-4.64448	3.40932e-06	3.67727e-05	TMEM86A
XLOC_018555	32.9045	-0.985641	0.378167	-2.60637	0.00915085	0.044284	hox-beta4
XLOC_035946	1802.33	-0.985153	0.127791	-7.70908	1.26724e-14	3.47708e-13	DDX52
XLOC_035946	1802.33	-0.985153	0.127791	-7.70908	1.26724e-14	3.47708e-13	Ddx52
XLOC_009164	5328.52	-0.983963	0.0980911	-10.0311	1.11252e-23	5.56041e-22	Noc2l
XLOC_022253	87.429	-0.983373	0.245389	-4.00741	6.1389e-05	0.000529578
XLOC_064908	72.6924	-0.981479	0.315055	-3.11526	0.00183784	0.0111997
XLOC_056890	268.728	-0.981205	0.188777	-5.19769	2.01783e-07	2.57805e-06
XLOC_012857	3026.83	-0.980961	0.10799	-9.08383	1.04822e-19	4.17478e-18	Slc6a8
XLOC_016320	76.426	-0.980112	0.325327	-3.0127	0.00258934	0.0151254
XLOC_071263	98.849	-0.979228	0.324082	-3.02154	0.0025149	0.0147485
XLOC_055701	231.213	-0.976785	0.235963	-4.13956	3.4797e-05	0.000315135	unknown
XLOC_068634	222.845	-0.976564	0.267469	-3.65113	0.00026109	0.00198267
XLOC_033733	1213.21	-0.975971	0.204803	-4.76541	1.88473e-06	2.11704e-05	unknown
XLOC_033733	1213.21	-0.975971	0.204803	-4.76541	1.88473e-06	2.11704e-05	Nrp2
XLOC_005074	3814.91	-0.975153	0.121416	-8.03152	9.62729e-16	2.90387e-14	Slc11a2
XLOC_070769	278.177	-0.971209	0.304038	-3.19437	0.00140136	0.00883206
XLOC_022323	480.195	-0.970827	0.138356	-7.01687	2.26885e-12	5.15337e-11	MAP1LC3A
XLOC_058414	40.9543	-0.969986	0.366176	-2.64896	0.00807401	0.0399652
XLOC_065064	717.443	-0.969833	0.171369	-5.65931	1.5198e-08	2.26829e-07
XLOC_063078	122.964	-0.968854	0.250502	-3.86765	0.000109887	0.000901612
XLOC_071726	88.6487	-0.968576	0.291639	-3.32115	0.000896469	0.00594608
XLOC_066910	156.914	-0.968377	0.20329	-4.76354	1.90228e-06	2.13453e-05
XLOC_006247	66.2863	-0.96821	0.345893	-2.79916	0.00512359	0.0272431
XLOC_000078	949.427	-0.965699	0.137731	-7.0115	2.3578e-12	5.34695e-11	RPL7
XLOC_029465	731.315	-0.964926	0.14749	-6.54232	6.05715e-11	1.18972e-09	MIPOL1
XLOC_003846	557.305	-0.964405	0.204628	-4.71298	2.44126e-06	2.70413e-05	RPTOR
XLOC_008438	832.566	-0.964285	0.165959	-5.81038	6.23322e-09	9.83026e-08	Rgma
XLOC_005020	1856.62	-0.963891	0.155969	-6.18001	6.4098e-10	1.12847e-08	TEX10
XLOC_027741	34.7299	-0.963804	0.373445	-2.58085	0.00985585	0.0471608
XLOC_055989	49.9732	-0.9637	0.35107	-2.74504	0.0060504	0.0313555
XLOC_000094	1628.16	-0.962911	0.13258	-7.26289	3.78903e-13	9.32299e-12	Macf1
XLOC_025558	680.466	-0.962528	0.170959	-5.63016	1.80039e-08	2.66493e-07	Ogdh
XLOC_030291	44.8107	-0.962445	0.349157	-2.75648	0.00584272	0.0304035
XLOC_028689	3943.59	-0.962328	0.105663	-9.10749	8.43082e-20	3.37961e-18
XLOC_052295	5094.31	-0.959249	0.113451	-8.45521	2.78577e-17	9.41683e-16	st6gal2
XLOC_001734	200.731	-0.958758	0.323358	-2.965	0.00302679	0.0173058
XLOC_065858	402.222	-0.957765	0.158318	-6.04964	1.45165e-09	2.45739e-08	PIK3C2A
XLOC_026177	909.543	-0.957085	0.126394	-7.57222	3.66891e-14	9.69081e-13	PTGER2
XLOC_068286	255.966	-0.95537	0.281694	-3.39152	0.000695072	0.00474977
XLOC_000170	1796.83	-0.954029	0.179201	-5.32378	1.01631e-07	1.35591e-06	Dnmbp
XLOC_004978	158.417	-0.953264	0.221577	-4.30217	1.69131e-05	0.000162801	NAGLU
XLOC_052507	632.155	-0.951965	0.191054	-4.9827	6.27041e-07	7.51491e-06	Slc12a1
XLOC_006280	49.9807	-0.949924	0.332392	-2.85784	0.0042653	0.023288
XLOC_040237	447.563	-0.949084	0.167924	-5.65187	1.58715e-08	2.3639e-07
XLOC_005523	63.9749	-0.947524	0.364628	-2.5986	0.00936047	0.0451717
XLOC_026244	375.529	-0.947084	0.175324	-5.40192	6.59314e-08	9.0366e-07	TDRD9
XLOC_036684	2177.28	-0.946991	0.114552	-8.2669	1.37484e-16	4.42544e-15	HES1
XLOC_038711	4662.05	-0.946744	0.0991967	-9.54411	1.37279e-21	6.09185e-20	gnl3
XLOC_062127	159.855	-0.946427	0.219832	-4.30522	1.66818e-05	0.000160826
XLOC_059470	78.5072	-0.945448	0.275807	-3.42793	0.000608203	0.0042183	Ptbp1
XLOC_058331	38.0267	-0.945391	0.351014	-2.69331	0.00707454	0.0356479
XLOC_052766	251.408	-0.944732	0.180323	-5.23912	1.61343e-07	2.0861e-06	Adamts7
XLOC_052766	251.408	-0.944732	0.180323	-5.23912	1.61343e-07	2.0861e-06	ADAMTS12
XLOC_012711	10800.9	-0.944645	0.10625	-8.89075	6.06972e-19	2.31481e-17
XLOC_014049	741.573	-0.943922	0.133028	-7.09565	1.28741e-12	2.98869e-11	St6galnac2
XLOC_029417	290.467	-0.943203	0.151658	-6.21929	4.99408e-10	8.9049e-09	Akap6
XLOC_056420	550.938	-0.941628	0.163816	-5.74807	9.02677e-09	1.39703e-07
XLOC_044753	5616.4	-0.941235	0.108219	-8.69749	3.39317e-18	1.22475e-16	MPHOSPH10
XLOC_056283	732.465	-0.940824	0.156487	-6.01215	1.8308e-09	3.06552e-08	unknown
XLOC_018621	7635.75	-0.940603	0.0936012	-10.049	9.27588e-24	4.6577e-22	PFKM
XLOC_022500	1064.59	-0.94031	0.108608	-8.6578	4.80958e-18	1.72302e-16	Slc7a8
XLOC_005907	85.3093	-0.9399	0.293601	-3.20128	0.00136818	0.00865683
XLOC_041635	13010	-0.93946	0.092306	-10.1777	2.4946e-24	1.29326e-22	Pes1
XLOC_014849	88.7944	-0.939438	0.27279	-3.44381	0.000573575	0.00400908	73
XLOC_017766	14831.8	-0.938664	0.085648	-10.9595	5.9799e-28	3.90805e-26	Nop56
XLOC_060252	2554.41	-0.938315	0.174061	-5.39073	7.01727e-08	9.5723e-07	LAMB1
XLOC_035893	7626.66	-0.936799	0.102507	-9.13891	6.30878e-20	2.5503e-18	mybbp1a
XLOC_029327	65.5444	-0.936531	0.2801	-3.34356	0.000827111	0.00553886
XLOC_013685	439.591	-0.934441	0.186845	-5.00114	5.69909e-07	6.86453e-06	MBTD1
XLOC_027065	44.8279	-0.933975	0.35493	-2.63144	0.00850246	0.0416888
XLOC_017635	409.594	-0.933229	0.14152	-6.59433	4.27193e-11	8.54324e-10	HPS6
XLOC_049675	1164.98	-0.931808	0.118923	-7.83542	4.67289e-15	1.32602e-13	KRR1
XLOC_011890	32.7817	-0.931265	0.358937	-2.59451	0.00947269	0.0456061
XLOC_046293	213.799	-0.930536	0.18915	-4.91957	8.67361e-07	1.0194e-05	BAX
XLOC_017702	1701.29	-0.930213	0.0960462	-9.68506	3.4899e-22	1.60995e-20	DDX56
XLOC_041425	12789.3	-0.929745	0.112852	-8.2386	1.74243e-16	5.57126e-15	WLS
XLOC_041425	12789.3	-0.929745	0.112852	-8.2386	1.74243e-16	5.57126e-15	Wls
XLOC_041549	51.0584	-0.929227	0.357795	-2.59709	0.00940163	0.0453501
XLOC_046301	1396.7	-0.928818	0.11134	-8.34214	7.29558e-17	2.39119e-15
XLOC_048271	138.212	-0.928482	0.231539	-4.01004	6.07091e-05	0.000524611
XLOC_024823	126.699	-0.928133	0.315381	-2.9429	0.00325154	0.0184003	Lurap1
XLOC_066666	63.2115	-0.928107	0.328383	-2.82629	0.004709	0.0253547	unknown
XLOC_058257	386.297	-0.928027	0.177562	-5.22651	1.72741e-07	2.22546e-06	unknown
XLOC_002064	15140.4	-0.927203	0.109384	-8.47662	2.31836e-17	7.89247e-16	PABPC4
XLOC_030907	71.9442	-0.926438	0.288141	-3.21522	0.00130343	0.00828362
XLOC_027169	353.241	-0.925953	0.159155	-5.81795	5.95746e-09	9.41946e-08	GABRA3
XLOC_031050	70.1469	-0.925353	0.354931	-2.60713	0.0091304	0.0442099
XLOC_016869	860.902	-0.923963	0.196787	-4.69524	2.66292e-06	2.9271e-05
XLOC_070030	110.497	-0.923248	0.217514	-4.24455	2.19036e-05	0.000206597
XLOC_048599	1507.98	-0.923002	0.252163	-3.66034	0.000251878	0.00192096	YAP1
XLOC_048743	89.8986	-0.921871	0.340579	-2.70678	0.00679395	0.0345406
XLOC_030025	41.3898	-0.920412	0.348261	-2.64288	0.00822036	0.0405611
XLOC_020743	78.8642	-0.919864	0.266559	-3.45088	0.000558764	0.00391825	pan1
XLOC_050616	1236.44	-0.919499	0.130442	-7.04908	1.80099e-12	4.13644e-11
XLOC_038155	72.3892	-0.917864	0.270304	-3.39568	0.000684592	0.00468484
XLOC_034358	150.405	-0.915138	0.260643	-3.51107	0.0004463	0.00321159	unknown
XLOC_071421	7782.91	-0.914455	0.119502	-7.65219	1.97585e-14	5.32985e-13
XLOC_044734	487.567	-0.914153	0.154563	-5.91444	3.33004e-09	5.42428e-08	MFSD12
XLOC_016714	2083.36	-0.913162	0.102953	-8.86966	7.33673e-19	2.78325e-17	unknown
XLOC_016714	2083.36	-0.913162	0.102953	-8.86966	7.33673e-19	2.78325e-17	trim33
XLOC_000285	529.809	-0.913074	0.15067	-6.06007	1.36061e-09	2.31142e-08	GTPBP6
XLOC_028631	92.4654	-0.912747	0.34978	-2.60949	0.00906778	0.0439412
XLOC_001718	193.759	-0.912139	0.31515	-2.8943	0.00380007	0.0210923	COLEC12
XLOC_061419	43431.9	-0.91184	0.188058	-4.84872	1.24258e-06	1.42847e-05	CLDN3
XLOC_003643	680.766	-0.909655	0.145731	-6.24201	4.31994e-10	7.74125e-09	MECR
XLOC_057683	55.4533	-0.909092	0.300337	-3.02691	0.00247069	0.0145129
XLOC_021640	12361	-0.908971	0.0929418	-9.77999	1.37219e-22	6.50405e-21	RSL1D1
XLOC_043550	765.289	-0.907716	0.133622	-6.79317	1.09693e-11	2.32045e-10
XLOC_042228	983.642	-0.90752	0.115471	-7.8593	3.86272e-15	1.10631e-13	Ccdc88c
XLOC_003333	889.379	-0.907158	0.177595	-5.10802	3.25554e-07	4.04906e-06	Uncharacterized
XLOC_005250	3309.34	-0.90637	0.107738	-8.41269	4.00715e-17	1.34089e-15	Urb1
XLOC_010419	71.907	-0.905718	0.287074	-3.15499	0.00160501	0.00995384
XLOC_040921	6390.34	-0.905269	0.0961401	-9.41615	4.6795e-21	2.01037e-19	Circumsporozoite
XLOC_040921	6390.34	-0.905269	0.0961401	-9.41615	4.6795e-21	2.01037e-19	BOP1
XLOC_048653	45.2794	-0.905198	0.333625	-2.71322	0.00666328	0.0339765
XLOC_030927	1459.87	-0.905137	0.109901	-8.23595	1.78131e-16	5.69136e-15	RGMA
XLOC_022504	357.728	-0.904114	0.182329	-4.95871	7.09643e-07	8.44853e-06	gbp
XLOC_005480	68.3164	-0.90388	0.330186	-2.73749	0.00619105	0.0319749
XLOC_040257	50.7733	-0.903673	0.33991	-2.65856	0.00784748	0.039005
XLOC_044292	54.3275	-0.901672	0.351511	-2.56513	0.0103137	0.0490637	IQCG
XLOC_028810	210.374	-0.901504	0.220893	-4.08118	4.48076e-05	0.000397508	hox-gamma4
XLOC_015916	3785.26	-0.900188	0.137225	-6.55994	5.38298e-11	1.06347e-09	Ca14
XLOC_051245	7599.7	-0.899706	0.12886	-6.98204	2.90924e-12	6.52545e-11	bzpR
XLOC_005181	1791.57	-0.899409	0.157984	-5.69304	1.248e-08	1.88679e-07	Skida1
XLOC_071873	201.559	-0.899231	0.185297	-4.85293	1.21653e-06	1.40151e-05
XLOC_009275	109.73	-0.898847	0.319836	-2.81033	0.00494905	0.0264848	unknown
XLOC_070274	53.8094	-0.897143	0.329516	-2.72261	0.00647679	0.0331904
XLOC_025615	665.024	-0.896657	0.148027	-6.05739	1.38347e-09	2.34933e-08	BCL10
XLOC_013686	5874.82	-0.896607	0.105233	-8.52023	1.59232e-17	5.46828e-16	MBTD1
XLOC_060743	75.5159	-0.89559	0.304554	-2.94066	0.00327515	0.0185147
XLOC_052147	142.363	-0.895038	0.271884	-3.29198	0.000994835	0.00652825
XLOC_003610	337.74	-0.895005	0.194355	-4.60499	4.12478e-06	4.38969e-05	unknown
XLOC_003610	337.74	-0.895005	0.194355	-4.60499	4.12478e-06	4.38969e-05	NAP1L4
XLOC_013484	3154.08	-0.89441	0.101515	-8.81066	1.24409e-18	4.64199e-17	SMCR8
XLOC_003215	2351.23	-0.893126	0.102396	-8.72228	2.72658e-18	9.90782e-17	unknown
XLOC_003215	2351.23	-0.893126	0.102396	-8.72228	2.72658e-18	9.90782e-17	PKNOX2
XLOC_014676	45.165	-0.892581	0.334274	-2.67021	0.00758049	0.0378875
XLOC_071585	364.519	-0.892056	0.167092	-5.33872	9.36044e-08	1.25659e-06
XLOC_055116	568.835	-0.891815	0.130331	-6.8427	7.77151e-12	1.67186e-10	CERKL
XLOC_054025	1813.77	-0.889527	0.127351	-6.98485	2.85168e-12	6.40633e-11
XLOC_005416	3025.51	-0.889164	0.108373	-8.20465	2.31255e-16	7.33974e-15	wdr12
XLOC_005416	3025.51	-0.889164	0.108373	-8.20465	2.31255e-16	7.33974e-15	CNBD2
XLOC_048598	3557.99	-0.889121	0.145878	-6.09498	1.09452e-09	1.87564e-08
XLOC_012692	297.219	-0.885338	0.180687	-4.89985	9.59091e-07	1.1214e-05	EPHB3
XLOC_012692	297.219	-0.885338	0.180687	-4.89985	9.59091e-07	1.1214e-05	Ephb3
XLOC_012692	297.219	-0.885338	0.180687	-4.89985	9.59091e-07	1.1214e-05	Epha4
XLOC_052076	207.881	-0.88532	0.202191	-4.37864	1.19422e-05	0.000117576	MMP15
XLOC_006874	781.078	-0.883198	0.147473	-5.9889	2.11266e-09	3.51699e-08	MYO10
XLOC_022306	1377.56	-0.883137	0.127157	-6.94526	3.77759e-12	8.39458e-11	St3gal2
XLOC_044115	156.205	-0.882864	0.226713	-3.8942	9.85253e-05	0.000817091	Dis3
XLOC_030247	444.197	-0.882741	0.181096	-4.87445	1.09114e-06	1.26482e-05	BTG3
XLOC_039316	1098.79	-0.881792	0.1235	-7.14002	9.33155e-13	2.20426e-11	infB
XLOC_027056	42.0369	-0.881391	0.326129	-2.70259	0.00688025	0.0349177	ccdc169
XLOC_023250	798.555	-0.880934	0.150646	-5.84772	4.98342e-09	7.96111e-08	exd1
XLOC_043626	744.737	-0.880143	0.126741	-6.94445	3.79938e-12	8.43431e-11	med15
XLOC_043626	744.737	-0.880143	0.126741	-6.94445	3.79938e-12	8.43431e-11	MAN1A2
XLOC_003538	5619.84	-0.879938	0.107502	-8.18535	2.71514e-16	8.56709e-15	GNL2
XLOC_036088	90.343	-0.879033	0.310888	-2.82749	0.00469143	0.0252755	VPS37B
XLOC_036088	90.343	-0.879033	0.310888	-2.82749	0.00469143	0.0252755	TMEM132E
XLOC_036088	90.343	-0.879033	0.310888	-2.82749	0.00469143	0.0252755	Tmem132c
XLOC_036088	90.343	-0.879033	0.310888	-2.82749	0.00469143	0.0252755	STX1B
XLOC_036088	90.343	-0.879033	0.310888	-2.82749	0.00469143	0.0252755	AACS
XLOC_029642	198.017	-0.878788	0.229402	-3.83078	0.000127738	0.00103449	Trmt112
XLOC_065062	119.526	-0.878542	0.294974	-2.97837	0.00289783	0.0166879
XLOC_048914	1456.74	-0.878025	0.185522	-4.73274	2.2151e-06	2.46692e-05	SLC7A2
XLOC_016532	3250.91	-0.877815	0.149983	-5.85276	4.83486e-09	7.74098e-08	UTP20
XLOC_031780	39.697	-0.877618	0.332665	-2.63814	0.0083362	0.0410182	SLC7A7
XLOC_050130	60.1743	-0.877533	0.325871	-2.69289	0.00708365	0.0356855
XLOC_021641	5219.97	-0.876807	0.0895992	-9.78589	1.29454e-22	6.14273e-21	WDR36
XLOC_049615	58.5262	-0.876643	0.323119	-2.71306	0.00666641	0.0339867	Samd1
XLOC_043614	129.001	-0.876518	0.290513	-3.01714	0.0025517	0.0149379	unknown
XLOC_016617	605.648	-0.876152	0.166366	-5.26641	1.39115e-07	1.81886e-06	DUSP8
XLOC_017800	627.475	-0.874148	0.131202	-6.66259	2.69036e-11	5.49709e-10	AP5S1
XLOC_050774	54.5538	-0.873907	0.312717	-2.79457	0.00519692	0.0275681
XLOC_064517	116.76	-0.873361	0.268435	-3.25353	0.00113982	0.00735432
XLOC_012882	692.582	-0.871124	0.269516	-3.23218	0.00122851	0.00785844	FRMD4A
XLOC_048136	75.0307	-0.870367	0.339979	-2.56006	0.0104653	0.0496535
XLOC_003703	11336.4	-0.870309	0.0992719	-8.76693	1.83609e-18	6.76312e-17	MYCN
XLOC_053624	1510.11	-0.867893	0.121186	-7.16164	7.97179e-13	1.89448e-11	Uncharacterized
XLOC_026209	1078.4	-0.86453	0.135872	-6.36284	1.98058e-10	3.69339e-09	FBXO33
XLOC_026209	1078.4	-0.86453	0.135872	-6.36284	1.98058e-10	3.69339e-09	aida-b
XLOC_069996	125.855	-0.864294	0.269738	-3.2042	0.00135438	0.00857706	PEX3
XLOC_008388	1371.01	-0.86242	0.13134	-6.56629	5.15828e-11	1.02061e-09	MRPS30
XLOC_008388	1371.01	-0.86242	0.13134	-6.56629	5.15828e-11	1.02061e-09	Galk2
XLOC_008388	1371.01	-0.86242	0.13134	-6.56629	5.15828e-11	1.02061e-09	Adal
XLOC_034338	231.186	-0.859988	0.25424	-3.38258	0.00071809	0.0048877	Flrt3
XLOC_070991	486.011	-0.859778	0.156825	-5.4824	4.19588e-08	5.91441e-07
XLOC_031901	32387.3	-0.85977	0.137668	-6.24525	4.23124e-10	7.60125e-09	an3
XLOC_066953	114.46	-0.857264	0.273827	-3.13068	0.00174402	0.0107036
XLOC_049749	76.5182	-0.856614	0.309594	-2.7669	0.00565921	0.0296093
XLOC_014026	251.133	-0.855533	0.210774	-4.05901	4.92811e-05	0.000433362	Pla2g6
XLOC_022358	1194.76	-0.854694	0.107508	-7.95005	1.86439e-15	5.49293e-14	LARS2
XLOC_010716	246.323	-0.854663	0.214923	-3.9766	6.99081e-05	0.000596508	NCEH1
XLOC_027157	201.506	-0.853727	0.213875	-3.99172	6.55964e-05	0.000562835	Nwd2
XLOC_068605	560.769	-0.853065	0.182102	-4.68453	2.80597e-06	3.07182e-05
XLOC_028779	79.1721	-0.852841	0.290301	-2.93778	0.00330572	0.0186606	SCN3A
XLOC_051465	65.9756	-0.852397	0.326038	-2.61441	0.00893808	0.0434053	Abhd10
XLOC_042636	7916.13	-0.850919	0.10837	-7.85194	4.09636e-15	1.17167e-13	NOP2
XLOC_012948	5799.11	-0.850582	0.11242	-7.56609	3.84614e-14	1.01403e-12	WDR3
XLOC_012948	5799.11	-0.850582	0.11242	-7.56609	3.84614e-14	1.01403e-12	RS1
XLOC_012948	5799.11	-0.850582	0.11242	-7.56609	3.84614e-14	1.01403e-12	CADPS
XLOC_012948	5799.11	-0.850582	0.11242	-7.56609	3.84614e-14	1.01403e-12	Cadps
XLOC_035047	479.641	-0.849039	0.15709	-5.4048	6.48819e-08	8.90124e-07	RAD54B
XLOC_066219	798.412	-0.848731	0.16127	-5.26279	1.41884e-07	1.85339e-06	Ddx24
XLOC_040052	7048.17	-0.848472	0.095193	-8.91317	4.95927e-19	1.90649e-17	RRP12
XLOC_040052	7048.17	-0.848472	0.095193	-8.91317	4.95927e-19	1.90649e-17	Rrp12
XLOC_036694	6867.78	-0.847841	0.111671	-7.59234	3.14177e-14	8.36506e-13	Epha7
XLOC_047737	4040.86	-0.847411	0.125934	-6.72903	1.70803e-11	3.55391e-10	dusp22
XLOC_004977	8813.86	-0.846762	0.116011	-7.29901	2.89892e-13	7.18616e-12	CDK6
XLOC_035050	86.2632	-0.846624	0.301909	-2.80423	0.00504363	0.0268908
XLOC_016533	2065.05	-0.846163	0.112808	-7.50091	6.33778e-14	1.64779e-12	Utp20
XLOC_040660	276.995	-0.846162	0.18337	-4.6145	3.94043e-06	4.20491e-05	SPIRE1
XLOC_052982	731.971	-0.845908	0.197034	-4.29321	1.76109e-05	0.00016884
XLOC_030926	8232.35	-0.845848	0.112942	-7.48925	6.92697e-14	1.79553e-12	2003-03-01
XLOC_001963	5660.24	-0.845292	0.111993	-7.5477	4.43014e-14	1.16444e-12	Fam60a
XLOC_002283	434.792	-0.84433	0.169233	-4.98916	6.06416e-07	7.27986e-06	unknown
XLOC_002283	434.792	-0.84433	0.169233	-4.98916	6.06416e-07	7.27986e-06	CHKA
XLOC_020689	1553.12	-0.843882	0.138501	-6.09296	1.10842e-09	1.89796e-08	SH3PXD2A
XLOC_048217	108.396	-0.843781	0.261514	-3.22653	0.00125301	0.0080009	snai1
XLOC_017829	232.305	-0.842412	0.244993	-3.43852	0.000584904	0.00407731	SLC20A2
XLOC_039439	5587.64	-0.841969	0.10243	-8.21995	2.03585e-16	6.4806e-15	GPX4
XLOC_040793	2646.93	-0.841959	0.135599	-6.20918	5.32615e-10	9.4618e-09	Cirh1a
XLOC_030946	724.984	-0.841944	0.132695	-6.34495	2.22501e-10	4.12779e-09	ADAM10
XLOC_018727	4777.55	-0.841159	0.122236	-6.88143	5.92535e-12	1.2895e-10	ACVR2B
XLOC_028571	4820.88	-0.839738	0.092049	-9.12273	7.32585e-20	2.95038e-18	wdr75
XLOC_049608	77.0845	-0.839498	0.282524	-2.97142	0.00296427	0.0170069
XLOC_059473	105.969	-0.837693	0.239269	-3.50105	0.000463436	0.00332381
XLOC_048539	2446.93	-0.835956	0.201434	-4.15002	3.32453e-05	0.000302653	FNDC3A
XLOC_019657	54.3135	-0.835596	0.299175	-2.793	0.00522219	0.0276752
XLOC_024646	1220.05	-0.835501	0.103304	-8.08778	6.07615e-16	1.85742e-14	C9orf72
XLOC_005436	117.74	-0.835226	0.229982	-3.63169	0.000281566	0.00211988
XLOC_066409	812.019	-0.8352	0.148164	-5.63698	1.73062e-08	2.56694e-07
XLOC_021529	377.085	-0.835193	0.14105	-5.92124	3.19518e-09	5.21642e-08	GAS7
XLOC_027014	44.7163	-0.834851	0.313844	-2.66008	0.00781216	0.0388743	FRY
XLOC_049759	946.846	-0.833612	0.131874	-6.32126	2.59445e-10	4.7762e-09
XLOC_010259	149.554	-0.832817	0.190699	-4.36717	1.25866e-05	0.000123442	CBFA2T3
XLOC_003479	3857.09	-0.832464	0.13083	-6.36296	1.97909e-10	3.69221e-09	TBL3
XLOC_035663	191.586	-0.832381	0.218485	-3.80979	0.000139085	0.00111737
XLOC_068816	472.636	-0.831537	0.137585	-6.0438	1.50529e-09	2.53921e-08
XLOC_017833	46.1772	-0.831467	0.322095	-2.58143	0.00983921	0.0471026	ST3GAL5
XLOC_035971	1794.47	-0.82988	0.147369	-5.63133	1.7883e-08	2.64795e-07	DBP10
XLOC_012737	4059.48	-0.829348	0.101338	-8.184	2.74579e-16	8.65746e-15
XLOC_018763	69.986	-0.829295	0.324029	-2.55932	0.0104877	0.0497323
XLOC_026390	103.308	-0.82902	0.277054	-2.99227	0.00276914	0.0160281	SLC8A1
XLOC_027237	7962.12	-0.828744	0.0992531	-8.3498	6.83782e-17	2.25142e-15	Uncharacterized
XLOC_028580	397.663	-0.826546	0.149252	-5.53793	3.06074e-08	4.40945e-07	MTERF1
XLOC_042136	390.197	-0.826306	0.159914	-5.16719	2.37644e-07	3.01568e-06	SIX4
XLOC_036954	90.6286	-0.826168	0.258457	-3.19654	0.00139085	0.00877804	USP48
XLOC_064187	357.927	-0.825764	0.252546	-3.26975	0.00107641	0.00700392	MGAT5
XLOC_011419	3716.46	-0.8257	0.112452	-7.34266	2.09392e-13	5.24184e-12	dvl3
XLOC_009265	5996.1	-0.824577	0.155305	-5.30941	1.09981e-07	1.46098e-06	gatsl1
XLOC_014905	1419.29	-0.824249	0.143566	-5.74124	9.39831e-09	1.44881e-07	Znf503
XLOC_070424	142.934	-0.824006	0.250597	-3.28817	0.00100839	0.00660618
XLOC_038663	12228.2	-0.823923	0.0955219	-8.62548	6.38223e-18	2.26199e-16	Lamb2
XLOC_020446	6248.29	-0.823731	0.117546	-7.00774	2.42204e-12	5.48398e-11	NHP2
XLOC_063791	887.906	-0.823684	0.207785	-3.96413	7.36654e-05	0.000625351
XLOC_065290	378.08	-0.822813	0.180807	-4.55077	5.34497e-06	5.56628e-05
XLOC_058988	3469.18	-0.821767	0.133007	-6.17835	6.47733e-10	1.13942e-08
XLOC_070230	1408.89	-0.81999	0.114409	-7.16718	7.65597e-13	1.82243e-11
XLOC_047135	1430.78	-0.819895	0.149374	-5.48888	4.04485e-08	5.72208e-07	FAM120A
XLOC_017484	625.674	-0.819209	0.148194	-5.52794	3.24018e-08	4.64271e-07	ENTPD3
XLOC_060014	130.98	-0.818845	0.217785	-3.75987	0.00017	0.00134469
XLOC_018831	1808.34	-0.818325	0.13776	-5.94023	2.84623e-09	4.67176e-08	Etv4
XLOC_036730	100.491	-0.817861	0.28442	-2.87553	0.00403344	0.0221878	slc25a36a
XLOC_025688	2311.34	-0.817349	0.114765	-7.12196	1.06406e-12	2.4927e-11	unknown
XLOC_061240	70.4734	-0.816588	0.290601	-2.80999	0.00495425	0.0265027	Ppp2r5a
XLOC_030350	262.648	-0.815763	0.166232	-4.90736	9.23088e-07	1.08136e-05	unknown
XLOC_031152	2645.68	-0.8153	0.114208	-7.13876	9.41772e-13	2.2234e-11	ECM16
XLOC_057244	1787.16	-0.814788	0.110719	-7.35903	1.85254e-13	4.64839e-12	Ptrh2
XLOC_016875	787.103	-0.814741	0.11795	-6.90749	4.933e-12	1.08338e-10	Dgkz
XLOC_058929	50.45	-0.813962	0.303372	-2.68305	0.00729538	0.0366622
XLOC_064296	577.179	-0.813763	0.149879	-5.42947	5.65215e-08	7.81643e-07	Adat1
XLOC_071584	145.698	-0.812649	0.242668	-3.3488	0.000811611	0.00544775
XLOC_034486	166.974	-0.812648	0.237625	-3.41987	0.000626509	0.00433134	gchfr
XLOC_068690	178.149	-0.811527	0.184048	-4.40932	1.03696e-05	0.000103153
XLOC_036697	104.288	-0.81152	0.220339	-3.68305	0.000230457	0.00177125	Epha7
XLOC_036697	104.288	-0.81152	0.220339	-3.68305	0.000230457	0.00177125	epha3
XLOC_050248	75.4276	-0.810797	0.282134	-2.8738	0.00405564	0.02229
XLOC_032515	276.581	-0.810469	0.195424	-4.14722	3.36532e-05	0.00030585	Mrpl3
XLOC_017856	831.787	-0.810208	0.195779	-4.13837	3.49779e-05	0.000316622	pcgf5a
XLOC_068328	204.577	-0.808558	0.178909	-4.51937	6.20234e-06	6.39861e-05	PUS3
XLOC_003891	1250.85	-0.808438	0.148038	-5.46101	4.73434e-08	6.62148e-07	ENPP7
XLOC_067958	175.254	-0.808387	0.29103	-2.77767	0.00547495	0.0287708
XLOC_013843	15902.7	-0.807543	0.117852	-6.85217	7.27381e-12	1.57028e-10	HMOX2
XLOC_060745	248.32	-0.807499	0.218318	-3.69873	0.000216678	0.0016743
XLOC_033254	81.9273	-0.807122	0.261328	-3.08854	0.00201145	0.0121529
XLOC_035364	4963.56	-0.806606	0.0862495	-9.35201	8.60004e-21	3.64029e-19	UTP6
XLOC_035364	4963.56	-0.806606	0.0862495	-9.35201	8.60004e-21	3.64029e-19	DAK
XLOC_036052	1083.88	-0.806363	0.142945	-5.64108	1.68983e-08	2.51162e-07	dom
XLOC_036052	1083.88	-0.806363	0.142945	-5.64108	1.68983e-08	2.51162e-07	ddx55
XLOC_049742	303.244	-0.805847	0.228621	-3.52482	0.000423771	0.00306635	Acp5
XLOC_066442	512.298	-0.805579	0.153994	-5.23124	1.68376e-07	2.17247e-06	ORF73
XLOC_013678	1886.6	-0.805282	0.101208	-7.95673	1.76651e-15	5.21526e-14	PDE6H
XLOC_013678	1886.6	-0.805282	0.101208	-7.95673	1.76651e-15	5.21526e-14	MAP2K3
XLOC_040724	1051.2	-0.804587	0.11773	-6.83415	8.24939e-12	1.76937e-10	UPF0547
XLOC_035972	1452.8	-0.802382	0.10209	-7.85959	3.85395e-15	1.10453e-13	DBP10
XLOC_047307	573.528	-0.799775	0.140193	-5.70482	1.16463e-08	1.76943e-07
XLOC_018873	265.047	-0.799187	0.289095	-2.76445	0.00570195	0.0298076	PKD1L1
XLOC_019632	104.745	-0.7983	0.296602	-2.69149	0.00711346	0.0358105
XLOC_008180	1451.89	-0.797353	0.136568	-5.83851	5.26705e-09	8.39245e-08	Wdr18
XLOC_008180	1451.89	-0.797353	0.136568	-5.83851	5.26705e-09	8.39245e-08	Msh5
XLOC_059764	242.085	-0.796839	0.17546	-4.54143	5.58732e-06	5.80158e-05	aptx
XLOC_003532	6166.32	-0.796739	0.126105	-6.31805	2.6489e-10	4.87229e-09	nop10
XLOC_049323	1506.88	-0.795423	0.137453	-5.78686	7.17133e-09	1.12113e-07	MATN1
XLOC_049323	1506.88	-0.795423	0.137453	-5.78686	7.17133e-09	1.12113e-07	DDX31
XLOC_049323	1506.88	-0.795423	0.137453	-5.78686	7.17133e-09	1.12113e-07	Cel
XLOC_024060	360.769	-0.795292	0.219007	-3.63135	0.000281938	0.00212194	ATF2
XLOC_065736	219.242	-0.795043	0.235916	-3.37003	0.000751599	0.00508951
XLOC_035987	3331.79	-0.794963	0.129782	-6.12538	9.04693e-10	1.56968e-08	NLK
XLOC_061989	708.732	-0.793916	0.217713	-3.64662	0.000265709	0.0020142	RBM4B
XLOC_024802	929.887	-0.793547	0.11756	-6.75014	1.47707e-11	3.08525e-10	Dph5
XLOC_040753	6042.65	-0.793319	0.115651	-6.85962	6.90455e-12	1.49505e-10	jarid2b
XLOC_060989	1096.24	-0.793318	0.109589	-7.23899	4.52022e-13	1.10402e-11
XLOC_000179	2529.51	-0.792522	0.149099	-5.31542	1.06414e-07	1.41577e-06	MINK1
XLOC_006816	1540.82	-0.792384	0.107112	-7.39773	1.38528e-13	3.51064e-12	SLC4A10
XLOC_008033	3824.44	-0.791351	0.0877794	-9.01522	1.96477e-19	7.73235e-18	Pias1
XLOC_034480	703.82	-0.790034	0.129028	-6.12297	9.18473e-10	1.58847e-08	AHSA2
XLOC_053396	469.1	-0.78967	0.195925	-4.03047	5.56659e-05	0.000484275	Rnf17
XLOC_060283	6323.38	-0.789403	0.110925	-7.11658	1.10642e-12	2.58662e-11	Wdr43
XLOC_059973	606.816	-0.789387	0.148721	-5.30782	1.10941e-07	1.47328e-06
XLOC_005476	179.211	-0.788652	0.196516	-4.01318	5.99064e-05	0.000518447
XLOC_010312	2020.93	-0.787763	0.105959	-7.43462	1.04869e-13	2.68287e-12	unknown
XLOC_069077	100.675	-0.787287	0.250736	-3.1399	0.00169006	0.0104184
XLOC_014017	1414.36	-0.786761	0.139455	-5.64169	1.68384e-08	2.50359e-07	MRPL27
XLOC_017802	4211.78	-0.786733	0.109193	-7.20496	5.80601e-13	1.39984e-11	GPAM
XLOC_018796	5348.61	-0.786384	0.096281	-8.16759	3.14607e-16	9.84755e-15	CLASP1
XLOC_053334	396.214	-0.78634	0.20876	-3.76672	0.000165405	0.0013122	tonsl
XLOC_042686	735.144	-0.786215	0.13369	-5.88087	4.08119e-09	6.58316e-08	tmem201
XLOC_037905	3548.82	-0.786147	0.114848	-6.84512	7.64124e-12	1.64466e-10	DDX24
XLOC_042779	6963.07	-0.785123	0.13365	-5.87448	4.24169e-09	6.82929e-08	TP63
XLOC_010577	6365.26	-0.78432	0.117666	-6.66563	2.63525e-11	5.3947e-10	CFAP20
XLOC_071246	133.089	-0.784207	0.246052	-3.18716	0.00143676	0.00903642
XLOC_004988	626.372	-0.784197	0.199667	-3.92752	8.58269e-05	0.000719109	unknown
XLOC_004988	626.372	-0.784197	0.199667	-3.92752	8.58269e-05	0.000719109	Fam221a
XLOC_012712	747.786	-0.784008	0.179863	-4.35892	1.30707e-05	0.000128015	gata1-a
XLOC_021554	396.162	-0.783744	0.155741	-5.03236	4.84487e-07	5.8899e-06	ZDHHC4
XLOC_021554	396.162	-0.783744	0.155741	-5.03236	4.84487e-07	5.8899e-06	SLC5A11
[truncated: 2,332 more rows]

## Sheet: DESeq2_T21vT18_upregulated
Supplementary data 1: Results of DESeq2 analyses comparing T18, T20 and T21 DNT RNA-seq datasets.
XLOC	baseMean	log2FoldChange	lfcSE	stat	pvalue	padj	geneID
XLOC_006886	2399.33	9.3393	0.259435	35.9986	8.78826e-284	1.89532e-279	SETD1A
XLOC_006886	2399.33	9.3393	0.259435	35.9986	8.78826e-284	1.89532e-279	Col6a1
XLOC_006884	2830.05	8.53815	0.400378	21.3252	6.62492e-101	3.91442e-98	COL6A2
XLOC_068849	174.617	8.29342	0.466422	17.7809	9.93272e-71	2.996e-68	COL6A3
XLOC_017600	225.26	8.15566	0.4187	19.4786	1.66924e-84	6.85707e-82	unknown
XLOC_038186	296.627	8.07158	0.373358	21.6189	1.19392e-103	7.57311e-101	LRAT
XLOC_054339	242.254	7.28932	0.408938	17.825	4.52118e-71	1.38307e-68
XLOC_016653	156.849	7.22399	0.443182	16.3003	9.82092e-60	2.10749e-57	LYVE1
XLOC_008013	859.647	7.14582	0.237426	30.0971	5.29077e-199	2.28207e-195	RORB
XLOC_008013	859.647	7.14582	0.237426	30.0971	5.29077e-199	2.28207e-195	Anxa2
XLOC_055725	307.102	7.04649	0.37327	18.8777	1.73931e-79	6.46737e-77	PRDM12
XLOC_040894	85.4311	6.91445	0.496982	13.9129	5.29202e-44	6.79347e-42	IL17B
XLOC_003391	1123.04	6.86366	0.218637	31.3929	2.52913e-216	1.81815e-212	Tnfrsf17
XLOC_027507	568.913	6.83916	0.257054	26.606	5.79029e-156	1.66502e-152
XLOC_001741	475.061	6.7484	0.267943	25.1859	5.71358e-140	9.85775e-137	Gdf7
XLOC_021622	40.788	6.70083	0.565776	11.8436	2.32266e-32	1.82483e-30	unknown
XLOC_054338	177.554	6.69641	0.405776	16.5027	3.50601e-61	7.95919e-59
XLOC_003768	453.974	6.68243	0.531897	12.5634	3.35583e-36	3.11955e-34
XLOC_006651	1918.39	6.67331	0.1791	37.2603	7.22797e-304	3.11764e-299	WNT1
XLOC_032345	741.089	6.6305	0.213448	31.0638	7.43459e-212	4.58109e-208	CadN
XLOC_019575	48.8959	6.62797	0.536968	12.3433	5.29365e-35	4.69817e-33	Fatty
XLOC_005424	1738.58	6.60591	0.584178	11.308	1.19732e-29	8.38374e-28	Krt8
XLOC_027069	111.125	6.59767	0.450135	14.6571	1.21364e-48	1.84324e-46	POU4F2
XLOC_048294	52.1552	6.59497	0.554127	11.9015	1.16177e-32	9.21152e-31	unknown
XLOC_048294	52.1552	6.59497	0.554127	11.9015	1.16177e-32	9.21152e-31	qkib
XLOC_004998	164.204	6.55455	0.359186	18.2483	2.13277e-74	7.02236e-72	wnt10a
XLOC_062399	91.3385	6.48933	0.48203	13.4625	2.59911e-41	2.95798e-39
XLOC_039551	2058.89	6.48662	0.472926	13.7159	8.14944e-43	9.87387e-41
XLOC_028523	294.109	6.46268	0.261819	24.6838	1.59843e-134	2.37742e-131	IGFBP3
XLOC_009299	56.7184	6.42526	0.491762	13.0658	5.16452e-39	5.50028e-37	SLC25A1
XLOC_047453	1143.08	6.39764	0.180625	35.4195	8.55901e-275	1.23059e-270	sox1
XLOC_012583	283.302	6.36859	0.283688	22.4493	1.3012e-111	1.12249e-108
XLOC_005359	238.408	6.28654	0.296461	21.2053	8.53832e-100	4.91045e-97	asic1
XLOC_021488	165.081	6.25272	0.341763	18.2955	8.98881e-75	2.98242e-72	Pitpnc1
XLOC_001848	384.437	6.22711	0.264555	23.538	1.66518e-122	2.11247e-119	pax6a
XLOC_068412	57.5	6.20324	0.513759	12.0742	1.44535e-33	1.20585e-31
XLOC_018068	44.7866	6.18865	0.506548	12.2173	2.51235e-34	2.17601e-32
XLOC_023333	430.717	6.15858	0.300938	20.4646	4.44976e-93	2.23176e-90	EDNRB
XLOC_013462	47.5101	6.12917	0.513044	11.9467	6.7572e-33	5.44782e-31
XLOC_071027	722.451	6.10734	0.282784	21.5972	1.90871e-103	1.19316e-100	Keratin%2C
XLOC_027215	1524.3	6.09472	0.374398	16.2787	1.39738e-59	2.98382e-57	TGFBI
XLOC_011847	48.1819	6.02563	0.49996	12.0522	1.88756e-33	1.56569e-31	ORF73
XLOC_017261	32.9033	6.01954	0.565008	10.6539	1.67201e-26	9.97496e-25
XLOC_048202	267.615	5.98295	0.578112	10.3491	4.22307e-25	2.30866e-23	PSMA4
XLOC_048202	267.615	5.98295	0.578112	10.3491	4.22307e-25	2.30866e-23	AGP9
XLOC_001024	63.4239	5.9733	0.491074	12.1637	4.84905e-34	4.1172e-32
XLOC_033467	65.7087	5.96548	0.448996	13.2863	2.78146e-40	3.06835e-38
XLOC_039546	868.498	5.91851	0.464688	12.7365	3.70625e-37	3.60049e-35	Foxd3
XLOC_007726	216.882	5.90888	0.297844	19.8389	1.37541e-87	6.11602e-85
XLOC_039476	80.8401	5.89967	0.418822	14.0863	4.6077e-45	6.09643e-43	NPR1
XLOC_015645	103.141	5.8922	0.389645	15.122	1.16008e-51	2.00954e-49	Onecut3
XLOC_015645	103.141	5.8922	0.389645	15.122	1.16008e-51	2.00954e-49	Onecut1
XLOC_048889	28.3218	5.86929	0.576915	10.1736	2.60149e-24	1.34706e-22	unknown
XLOC_048889	28.3218	5.86929	0.576915	10.1736	2.60149e-24	1.34706e-22	Fat4
XLOC_014868	99.5419	5.83893	0.397846	14.6764	9.13696e-49	1.40251e-46	unknown
XLOC_018065	36.0963	5.80896	0.525836	11.0471	2.26418e-28	1.50017e-26
XLOC_013521	11146.3	5.78138	0.335304	17.2422	1.28111e-66	3.45364e-64	Retn
XLOC_028492	33061	5.76668	0.539047	10.6979	1.04093e-26	6.27952e-25	Krt8
XLOC_028783	28.6626	5.75337	0.561244	10.2511	1.17009e-24	6.24621e-23	WNT3
XLOC_012581	73.2058	5.74431	0.416889	13.779	3.41108e-43	4.21576e-41	KRT9
XLOC_018633	1305.94	5.74151	0.390584	14.6998	6.46524e-49	9.95947e-47	agr2
XLOC_014620	23.0701	5.73072	0.585081	9.79474	1.18597e-22	5.65867e-21
XLOC_003802	353.953	5.71848	0.243315	23.5023	3.86018e-122	4.75717e-119	unknown
XLOC_011813	671.794	5.71395	0.399831	14.2909	2.49258e-46	3.42397e-44	unknown
XLOC_011813	671.794	5.71395	0.399831	14.2909	2.49258e-46	3.42397e-44	PRSS12
XLOC_022324	69.9068	5.69372	0.424496	13.4129	5.08158e-41	5.75285e-39
XLOC_014877	328.264	5.69103	0.226967	25.0743	9.49388e-139	1.51666e-135	ADAMTS3
XLOC_014877	328.264	5.69103	0.226967	25.0743	9.49388e-139	1.51666e-135	ADAMTS14
XLOC_010339	90.6115	5.67441	0.38147	14.8751	4.7811e-50	7.6949e-48	unknown
XLOC_010339	90.6115	5.67441	0.38147	14.8751	4.7811e-50	7.6949e-48	IRX2
XLOC_010339	90.6115	5.67441	0.38147	14.8751	4.7811e-50	7.6949e-48	irx2
XLOC_040622	1531.07	5.66843	0.393302	14.4124	4.32259e-47	6.21487e-45	IL17B
XLOC_054490	3178.88	5.62806	0.354581	15.8724	9.8371e-57	1.93746e-54	GCLC
XLOC_021616	57.3629	5.61892	0.448998	12.5144	6.23156e-36	5.70671e-34
XLOC_018066	31.6359	5.58581	0.554755	10.069	7.57582e-24	3.83081e-22
XLOC_069099	33.6907	5.58544	0.523671	10.6659	1.46936e-26	8.77811e-25
XLOC_018064	21.2861	5.5643	0.600815	9.26125	2.02062e-20	8.38839e-19
XLOC_018131	27.1338	5.55817	0.544463	10.2085	1.81616e-24	9.55322e-23
XLOC_050776	23.7061	5.54798	0.589038	9.41871	4.56647e-21	1.96376e-19	SIGLEC15
XLOC_003335	120.913	5.51458	0.331052	16.6577	2.65974e-62	6.20122e-60
XLOC_005318	162.809	5.49862	0.328175	16.7551	5.19331e-63	1.25844e-60	SDPR
XLOC_045195	29.0517	5.48259	0.557111	9.8411	7.48895e-23	3.60112e-21
XLOC_043700	528.279	5.46028	0.210859	25.8954	7.50376e-148	1.79811e-144	unknown
XLOC_036671	60.6503	5.43979	0.465446	11.6873	1.48048e-31	1.12624e-29	MOXD1
XLOC_002230	80.5002	5.409	0.358415	15.0915	1.8433e-51	3.16762e-49	cgbb
XLOC_030256	258.025	5.40158	0.335297	16.1099	2.1755e-58	4.55514e-56	has1
XLOC_030208	847.793	5.39761	0.197841	27.2826	6.82229e-164	2.26358e-160	Adamts1
XLOC_007940	995.996	5.38846	0.43032	12.522	5.66095e-36	5.20626e-34
XLOC_007485	22.617	5.3875	0.581074	9.27163	1.83328e-20	7.6441e-19
XLOC_024931	69.6076	5.35439	0.420278	12.7401	3.53888e-37	3.45345e-35
XLOC_016716	388.643	5.32419	0.5471	9.73166	2.20954e-22	1.03704e-20	endou
XLOC_005319	36.5971	5.30252	0.532453	9.95865	2.31182e-23	1.13701e-21	unknown
XLOC_005319	36.5971	5.30252	0.532453	9.95865	2.31182e-23	1.13701e-21	Tmeff1
XLOC_017390	262.99	5.29808	0.230854	22.9499	1.47627e-116	1.5919e-113
XLOC_058175	2179.79	5.29586	0.203967	25.9643	1.25237e-148	3.17755e-145	RASD1
XLOC_003780	1952.88	5.2852	0.351216	15.0483	3.54343e-51	6.01727e-49
XLOC_017845	57.6545	5.28092	0.454132	11.6286	2.94895e-31	2.21212e-29
XLOC_008338	1940.3	5.27111	0.400714	13.1543	1.60728e-39	1.74188e-37	fsta
XLOC_054337	42.7234	5.25645	0.469306	11.2005	4.05521e-29	2.76761e-27	LMX1B
XLOC_026382	208.365	5.24771	0.451509	11.6226	3.16338e-31	2.36475e-29	Fos
XLOC_013846	593.906	5.24499	0.404523	12.9659	1.91027e-38	1.99023e-36
XLOC_040172	593.492	5.24449	0.204745	25.6148	1.04465e-144	2.14566e-141	GFPT1
XLOC_071290	218.23	5.24068	0.298371	17.5643	4.62116e-69	1.34679e-66
XLOC_035381	134.162	5.23961	0.336969	15.5492	1.61074e-54	3.00761e-52
XLOC_034149	18.7217	5.23772	0.590082	8.87627	6.91404e-19	2.6252e-17
XLOC_012411	16.2411	5.23459	0.61775	8.47365	2.37825e-17	8.09e-16
XLOC_015890	180.116	5.21511	0.265245	19.6615	4.60791e-86	1.94856e-83	GPR98
XLOC_010609	43.1245	5.20217	0.504249	10.3167	5.92354e-25	3.21788e-23	Irx3
XLOC_018069	15.728	5.18767	0.619401	8.3753	5.50834e-17	1.82903e-15
XLOC_011818	3271.69	5.18308	0.196456	26.3829	2.15539e-153	5.81054e-150	Gch1
XLOC_040133	18.5885	5.17899	0.590766	8.76656	1.84206e-18	6.77355e-17	unknown
XLOC_008133	40.4292	5.17808	0.452918	11.4327	2.87039e-30	2.07732e-28	Bo17
XLOC_040208	308.513	5.15244	0.264132	19.5071	9.56125e-85	3.96544e-82	unknown
XLOC_037607	19.7175	5.14882	0.584649	8.80669	1.28893e-18	4.80514e-17
XLOC_063536	35.3655	5.11282	0.502138	10.1821	2.38383e-24	1.23733e-22	Pfn2
XLOC_014865	783.549	5.10529	0.16716	30.5414	7.35592e-205	3.96604e-201	unknown
XLOC_014865	783.549	5.10529	0.16716	30.5414	7.35592e-205	3.96604e-201	Adora2a
XLOC_015569	14.9164	5.09365	0.623546	8.16884	3.11358e-16	9.76003e-15
XLOC_021434	2053.07	5.09331	0.446275	11.413	3.60273e-30	2.5986e-28	SOX10
XLOC_017789	30.2575	5.07879	0.530122	9.58041	9.66627e-22	4.35214e-20	HMX3
XLOC_006683	288.479	5.05716	0.461895	10.9487	6.73855e-28	4.38392e-26	SSPO
XLOC_000070	186.81	5.05536	0.288279	17.5363	7.56798e-69	2.1762e-66	moxd1
XLOC_034470	25.5619	5.05288	0.554689	9.10939	8.28471e-20	3.32413e-18	Plek2
XLOC_036681	144.335	5.05049	0.372915	13.5433	8.68092e-42	1.01473e-39	unknown
XLOC_018067	15.7803	5.02756	0.601204	8.36249	6.14073e-17	2.02964e-15
XLOC_070432	208.879	5.02568	0.2452	20.4963	2.3246e-93	1.19365e-90
XLOC_003498	19.8717	4.99184	0.614272	8.12644	4.42089e-16	1.36497e-14
XLOC_069061	22.7798	4.97114	0.578958	8.58636	8.97666e-18	3.13514e-16	unknown
XLOC_000676	985.013	4.96989	0.241998	20.5369	1.00745e-93	5.23547e-91
XLOC_016816	234.804	4.95893	0.502876	9.86114	6.13461e-23	2.97308e-21	MUC5AC
XLOC_028502	58.8096	4.95265	0.407855	12.1432	6.23664e-34	5.26429e-32
XLOC_029690	709.993	4.94502	0.400603	12.344	5.25071e-35	4.66967e-33	CAPN8
XLOC_038289	23.0621	4.94222	0.537532	9.19428	3.77512e-20	1.5449e-18
XLOC_020540	325.365	4.94192	0.260557	18.9668	3.21137e-80	1.21505e-77	unknown
XLOC_040707	887.835	4.93946	0.404385	12.2147	2.59351e-34	2.23732e-32	mafb
XLOC_040186	871.082	4.93908	0.501354	9.8515	6.75289e-23	3.26173e-21	PAX5
XLOC_040186	871.082	4.93908	0.501354	9.8515	6.75289e-23	3.26173e-21	pax5
XLOC_043172	31.9783	4.93895	0.519016	9.51599	1.79988e-21	7.92188e-20	CFTR
XLOC_043172	31.9783	4.93895	0.519016	9.51599	1.79988e-21	7.92188e-20	Cftr
XLOC_066646	2003.76	4.93415	0.222942	22.132	1.555e-108	1.21949e-105
XLOC_049208	4900.51	4.89763	0.354417	13.8188	1.96256e-43	2.48243e-41	CALML5
XLOC_006778	331.638	4.89694	0.246324	19.88	6.05755e-88	2.75032e-85	eng2a
XLOC_025030	21.865	4.89567	0.597341	8.19576	2.49009e-16	7.88006e-15
XLOC_016864	677.418	4.89312	0.250006	19.572	2.67844e-85	1.12164e-82	EHF
XLOC_006889	18.0608	4.88481	0.603464	8.09462	5.74423e-16	1.75845e-14	KIF28P
XLOC_011748	549.323	4.88307	0.213677	22.8526	1.37579e-115	1.41291e-112	Ston2
XLOC_026359	1819.43	4.87532	0.368877	13.2167	7.03243e-40	7.69873e-38	Prx
XLOC_009228	50.9346	4.87275	0.473013	10.3015	6.93702e-25	3.74955e-23	ccdc64
XLOC_048890	126.546	4.86556	0.355	13.7058	9.37199e-43	1.12917e-40	unknown
XLOC_048890	126.546	4.86556	0.355	13.7058	9.37199e-43	1.12917e-40	Fat4
XLOC_024019	479.167	4.86272	0.237586	20.4672	4.22321e-93	2.14305e-90	bgn
XLOC_060452	12.9354	4.86055	0.630238	7.71224	1.2363e-14	3.39652e-13
XLOC_011900	39.9976	4.85591	0.475747	10.2069	1.84652e-24	9.68929e-23	BMP4
XLOC_024637	14.7569	4.8518	0.621705	7.80403	5.99619e-15	1.68491e-13	RPE65
XLOC_070117	17.8941	4.84118	0.597293	8.1052	5.26577e-16	1.61542e-14
XLOC_039477	14.9647	4.83903	0.615	7.86835	3.59347e-15	1.034e-13	NPR1
XLOC_011891	172.602	4.83157	0.258514	18.6898	5.99502e-78	2.1437e-75	relb
XLOC_016437	18.3852	4.83031	0.569085	8.48786	2.10484e-17	7.17693e-16
XLOC_040244	26.4718	4.8294	0.541224	8.92311	4.53382e-19	1.74761e-17	DAPP1
XLOC_071790	188.134	4.82925	0.289244	16.6961	1.39867e-62	3.33309e-60
XLOC_028768	21.3656	4.82693	0.548456	8.80095	1.35657e-18	5.03555e-17	Lypd1
XLOC_019591	62.9481	4.8235	0.401276	12.0204	2.77562e-33	2.2804e-31	Matn4
XLOC_018070	23.0496	4.81646	0.552721	8.71408	2.93136e-18	1.06251e-16
XLOC_025692	1087.18	4.81254	0.635578	7.57191	3.67766e-14	9.70799e-13	Ptgs1
XLOC_047798	30.085	4.805	0.492986	9.74673	1.90505e-22	8.9902e-21
XLOC_012650	16.1401	4.80345	0.612434	7.84321	4.39158e-15	1.25114e-13	unknown
XLOC_006932	12.7623	4.79559	0.633279	7.57263	3.65743e-14	9.66641e-13	SOSTDC1
XLOC_014964	18.0832	4.78978	0.599176	7.99395	1.3068e-15	3.90617e-14	Tmprss11d
XLOC_040515	152.698	4.78902	0.314807	15.2126	2.9193e-52	5.11863e-50
XLOC_001907	25.7747	4.7802	0.605715	7.89182	2.97801e-15	8.61505e-14	nell2
XLOC_032344	144.598	4.77467	0.565946	8.43661	3.26663e-17	1.09992e-15	CadN
XLOC_027135	194.347	4.7719	0.257575	18.5263	1.26791e-76	4.3751e-74	unknown
XLOC_068134	24.3315	4.75919	0.587428	8.10174	5.4178e-16	1.66088e-14
XLOC_029691	632.19	4.75844	0.275658	17.2621	9.06895e-67	2.4602e-64	CAPN8
XLOC_029691	632.19	4.75844	0.275658	17.2621	9.06895e-67	2.4602e-64	Capn8
XLOC_055983	27.2661	4.75558	0.552188	8.61225	7.16433e-18	2.52055e-16	TRIM65
XLOC_001874	1321.91	4.75343	0.228369	20.8147	3.18491e-96	1.6753e-93	CELF2
XLOC_001874	1321.91	4.75343	0.228369	20.8147	3.18491e-96	1.6753e-93	Celf1
XLOC_001874	1321.91	4.75343	0.228369	20.8147	3.18491e-96	1.6753e-93	celf1
XLOC_024774	7009.33	4.74548	0.65518	7.24303	4.38785e-13	1.07291e-11	Cdcp2
XLOC_023898	390.143	4.73967	0.520449	9.10688	8.47852e-20	3.39558e-18	unknown
XLOC_036031	342.906	4.73606	0.246977	19.1761	5.86018e-82	2.32027e-79
XLOC_009692	33.9549	4.73105	0.503726	9.39211	5.88074e-21	2.50894e-19
XLOC_058242	18.1943	4.72528	0.595435	7.93585	2.09063e-15	6.13435e-14
XLOC_000632	126.713	4.71393	0.309796	15.2163	2.75859e-52	4.85658e-50	unknown
XLOC_000632	126.713	4.71393	0.309796	15.2163	2.75859e-52	4.85658e-50	NLGN4X
XLOC_000632	126.713	4.71393	0.309796	15.2163	2.75859e-52	4.85658e-50	NLGN3
XLOC_030978	46.3119	4.70784	0.450103	10.4595	1.32611e-25	7.477e-24	htr1aa
XLOC_045417	315.536	4.7009	0.518862	9.06003	1.30419e-19	5.17513e-18
XLOC_018897	33.7161	4.69534	0.472232	9.94286	2.70931e-23	1.32947e-21	Des
XLOC_010656	126.234	4.69229	0.313482	14.9683	1.1834e-50	1.94082e-48	Neto2
XLOC_038890	35.2448	4.68086	0.483513	9.68093	3.634e-22	1.67463e-20	Red-sensitive
XLOC_021593	18.3293	4.66779	0.586782	7.9549	1.79279e-15	5.28922e-14
XLOC_023115	10578.5	4.66269	0.188839	24.6913	1.32608e-134	2.04278e-131	phyhd1
XLOC_051429	129.682	4.65846	0.371291	12.5467	4.14664e-36	3.84638e-34	Src42A
XLOC_067154	63.3071	4.65316	0.448489	10.3752	3.21587e-25	1.77606e-23	SSPO
XLOC_059482	63.7839	4.65296	0.389305	11.952	6.3411e-33	5.12192e-31
XLOC_007783	26.062	4.64767	0.518943	8.95604	3.36551e-19	1.31015e-17
XLOC_006684	1092.4	4.64343	0.412579	11.2547	2.19675e-29	1.51847e-27	SSPO
XLOC_043422	135.974	4.64114	0.363563	12.7657	2.54755e-37	2.50304e-35
XLOC_026926	16.3158	4.63147	0.593854	7.799	6.24008e-15	1.7523e-13
XLOC_047620	17.0932	4.6273	0.583941	7.92426	2.29509e-15	6.70237e-14
XLOC_012878	391.116	4.62462	0.494759	9.34722	8.99822e-21	3.80137e-19	KIAA1324L
XLOC_000363	258.677	4.62096	0.280832	16.4545	7.78363e-61	1.7217e-58	unknown
XLOC_000363	258.677	4.62096	0.280832	16.4545	7.78363e-61	1.7217e-58	Src42A
XLOC_046812	1217.6	4.61421	0.189378	24.365	4.01597e-131	5.77402e-128	Sdc2
XLOC_007780	19.0919	4.60885	0.596698	7.72393	1.12793e-14	3.11069e-13
XLOC_040178	79.1126	4.60462	0.422396	10.9012	1.13782e-27	7.2386e-26	unknown
XLOC_061091	233.732	4.60252	0.294674	15.619	5.40542e-55	1.0271e-52	UFL1
XLOC_005286	14.3262	4.59856	0.596279	7.71209	1.23776e-14	3.39836e-13	NEUROD1
XLOC_027790	16.275	4.59544	0.578852	7.93889	2.04006e-15	5.99414e-14	has2
XLOC_011763	12.6185	4.58768	0.623632	7.3564	1.88939e-13	4.73258e-12	Fam98a
XLOC_065807	22.072	4.58318	0.575477	7.96415	1.66357e-15	4.92482e-14	tlcd2
XLOC_065807	22.072	4.58318	0.575477	7.96415	1.66357e-15	4.92482e-14	Ddx55
XLOC_061757	31.5147	4.58049	0.511904	8.94794	3.62163e-19	1.40731e-17	frrs1
XLOC_042196	18.8944	4.58035	0.562354	8.14496	3.79402e-16	1.17902e-14	SYTL1
XLOC_060882	16.8889	4.57783	0.624024	7.33598	2.20111e-13	5.50379e-12
XLOC_005316	27.5874	4.57346	0.501393	9.12151	7.40857e-20	2.98091e-18	STOM
XLOC_026271	106.59	4.564	0.3487	13.0886	3.82437e-39	4.09321e-37	OPN3
XLOC_070438	170.202	4.56124	0.30205	15.101	1.59574e-51	2.75315e-49
XLOC_000112	96.5147	4.56096	0.331099	13.7752	3.5944e-43	4.42964e-41	DTNB
XLOC_000112	96.5147	4.56096	0.331099	13.7752	3.5944e-43	4.42964e-41	DNMT3A
XLOC_020711	80.4718	4.55498	0.352508	12.9216	3.39847e-38	3.49015e-36	WDR1
XLOC_021444	461.805	4.55261	0.216969	20.9828	9.41739e-98	5.14178e-95	Abcc3
XLOC_010533	142.118	4.54924	0.357946	12.7093	5.24978e-37	5.06575e-35
XLOC_035853	151.206	4.54668	0.280217	16.2256	3.32544e-59	7.06582e-57	NOS3
XLOC_069589	1143.12	4.534	0.228499	19.8425	1.27841e-87	5.74394e-85
XLOC_059329	156.715	4.52744	0.379635	11.9257	8.69011e-33	6.9413e-31
XLOC_066647	4606.91	4.52671	0.208074	21.7553	6.15736e-105	4.14977e-102	Keratin%2C
XLOC_016726	151.186	4.52656	0.250067	18.1014	3.10651e-73	9.85242e-71	fumD
XLOC_016726	151.186	4.52656	0.250067	18.1014	3.10651e-73	9.85242e-71	Agbl2
XLOC_006513	69.1942	4.52453	0.344285	13.1418	1.89629e-39	2.04995e-37	Frrs1l
XLOC_060449	10.7743	4.52249	0.634752	7.12482	1.0422e-12	2.44842e-11
XLOC_038891	17.7237	4.49474	0.584203	7.69381	1.42823e-14	3.88912e-13	RHO
XLOC_006993	774.475	4.49458	0.272337	16.5038	3.44694e-61	7.8665e-59	unknown
XLOC_041654	14.7319	4.49219	0.633295	7.09335	1.309e-12	3.03554e-11	Epsti1
XLOC_006652	23.3414	4.49021	0.53319	8.42141	3.71968e-17	1.24663e-15	WNT9A
XLOC_026819	35.0528	4.48488	0.469643	9.54955	1.30267e-21	5.79857e-20
XLOC_019581	89.8976	4.48345	0.348099	12.8798	5.84827e-38	5.93537e-36	khdrbs2
XLOC_001703	10.1249	4.46378	0.644984	6.92076	4.49215e-12	9.91606e-11	Cmpk2
XLOC_039413	41.5484	4.45171	0.433783	10.2625	1.03971e-24	5.57782e-23	trabd2b
XLOC_034364	142.599	4.44288	0.276734	16.0547	5.29712e-58	1.09321e-55	SPTBN1
XLOC_023251	200.544	4.44019	0.255718	17.3636	1.55621e-67	4.33058e-65	FREM2
XLOC_023251	200.544	4.44019	0.255718	17.3636	1.55621e-67	4.33058e-65	Frem2
XLOC_009544	166.036	4.43681	0.265081	16.7375	6.98171e-63	1.68236e-60	DSC1
XLOC_037513	607.802	4.43199	0.517494	8.56434	1.08694e-17	3.75965e-16	TDH
XLOC_016710	130.424	4.43133	0.339878	13.038	7.43714e-39	7.86241e-37	KIAA1549L
XLOC_006856	853.665	4.42944	0.239348	18.5062	1.8388e-76	6.29469e-74	AGR3
XLOC_050475	34.3775	4.42708	0.462108	9.58018	9.68788e-22	4.35732e-20	Gria4
XLOC_011468	24.0482	4.42374	0.573006	7.72024	1.16113e-14	3.19407e-13	CKM
XLOC_040516	96.6003	4.41982	0.612297	7.21842	5.25931e-13	1.27587e-11
XLOC_046273	89.3805	4.41803	0.408796	10.8074	3.17491e-27	1.96758e-25	Nlgn4l
XLOC_032412	147.691	4.41652	0.264852	16.6755	1.97681e-62	4.68494e-60	SULT2B1
XLOC_066300	14.9026	4.40783	0.590732	7.46164	8.54546e-14	2.19661e-12
XLOC_068458	24.8164	4.40592	0.527061	8.35941	6.30307e-17	2.07852e-15
XLOC_011482	119.409	4.40369	0.33036	13.33	1.54948e-40	1.73145e-38	VIT
XLOC_053625	141.92	4.403	0.285334	15.4311	1.01198e-53	1.84177e-51	unknown
XLOC_009546	242.652	4.39576	0.243571	18.0471	8.30749e-73	2.61553e-70	Rhof
XLOC_021489	87.6514	4.39066	0.310838	14.1253	2.65445e-45	3.54472e-43	unknown
XLOC_021489	87.6514	4.39066	0.310838	14.1253	2.65445e-45	3.54472e-43	Pitpnc1
XLOC_022434	154.293	4.38339	0.279999	15.655	3.07159e-55	5.88832e-53	Cmtm8
XLOC_002623	331.76	4.37799	0.215562	20.3097	1.05553e-91	5.17363e-89
XLOC_026258	2913.05	4.3762	0.189696	23.0695	9.37456e-118	1.06409e-114	thbs1
XLOC_017688	98.6872	4.37178	0.328743	13.2985	2.36245e-40	2.62628e-38	DPYSL2
XLOC_067707	11.6878	4.36132	0.616456	7.07483	1.49636e-12	3.46073e-11
XLOC_003810	110.867	4.35993	0.353308	12.3403	5.49384e-35	4.85586e-33	MLH
XLOC_003810	110.867	4.35993	0.353308	12.3403	5.49384e-35	4.85586e-33	FGF9
XLOC_004960	2875.98	4.35978	0.19863	21.9492	8.81336e-107	6.44316e-104	Aoc1
XLOC_010411	30.0353	4.35872	0.489873	8.89764	5.7045e-19	2.18325e-17	FA2H
XLOC_015568	11.1897	4.34431	0.629813	6.89777	5.28241e-12	1.15482e-10
XLOC_058259	260.015	4.34307	0.291338	14.9073	2.95467e-50	4.79111e-48	SATB2
XLOC_058259	260.015	4.34307	0.291338	14.9073	2.95467e-50	4.79111e-48	Satb2
XLOC_000148	463.494	4.3395	0.168279	25.7876	1.22119e-146	2.7723e-143	St18
XLOC_000148	463.494	4.3395	0.168279	25.7876	1.22119e-146	2.7723e-143	MYT1L
XLOC_028677	20.2461	4.3391	0.594085	7.30384	2.79661e-13	6.9445e-12	CXCR3
XLOC_064628	656.555	4.32962	0.502753	8.61182	7.19092e-18	2.52784e-16	Il17c
XLOC_013619	271.478	4.32141	0.234525	18.4262	8.09991e-76	2.75097e-73	P4HB
XLOC_013619	271.478	4.32141	0.234525	18.4262	8.09991e-76	2.75097e-73	BAIAP3
XLOC_066465	196.473	4.31987	0.280753	15.3867	2.00914e-53	3.62595e-51
XLOC_065992	10.9194	4.31982	0.627472	6.88448	5.79997e-12	1.26349e-10
XLOC_061906	888.11	4.31392	0.200805	21.4832	2.23727e-102	1.37857e-99	DSPP
XLOC_040209	142.073	4.31195	0.367194	11.743	7.6744e-32	5.89003e-30	HBEGF
XLOC_028519	78.2795	4.30465	0.394077	10.9234	8.91357e-28	5.72127e-26	TGFBR2
XLOC_044299	127.969	4.30373	0.573775	7.50073	6.34625e-14	1.64899e-12	CHST5
XLOC_028055	225.101	4.29805	0.2361	18.2044	4.76595e-74	1.54564e-71	lamb4
XLOC_014755	1994.74	4.29771	0.210581	20.4088	1.39686e-92	6.92535e-90	TNIP3
XLOC_022164	127.727	4.29552	0.286473	14.9945	7.97768e-51	1.3184e-48
XLOC_005148	443.239	4.29212	0.193846	22.142	1.24688e-108	9.95954e-106	unknown
XLOC_005148	443.239	4.29212	0.193846	22.142	1.24688e-108	9.95954e-106	Igfbp2
XLOC_005148	443.239	4.29212	0.193846	22.142	1.24688e-108	9.95954e-106	igfbp2
XLOC_018891	13.024	4.29057	0.633832	6.76926	1.2944e-11	2.71554e-10	FMNL3
XLOC_039464	192.934	4.28472	0.311596	13.7509	5.03222e-43	6.18389e-41	JUN
XLOC_006945	93.7506	4.28091	0.628464	6.8117	9.64507e-12	2.0524e-10	unknown
XLOC_015735	853.368	4.28084	0.166323	25.7381	4.38054e-146	9.44729e-143	ITGA2
XLOC_015735	853.368	4.28084	0.166323	25.7381	4.38054e-146	9.44729e-143	ITGA11
XLOC_015735	853.368	4.28084	0.166323	25.7381	4.38054e-146	9.44729e-143	ITGA10
XLOC_014823	214.048	4.27961	0.267997	15.9689	2.10477e-57	4.22256e-55	pax2a
XLOC_040181	835.711	4.27914	0.200934	21.2962	1.23164e-100	7.17897e-98	UGT8
XLOC_016564	144.019	4.27701	0.32191	13.2864	2.77738e-40	3.06835e-38	MGAT4C
XLOC_026507	14.5602	4.2739	0.593989	7.19525	6.23449e-13	1.49645e-11
XLOC_031886	464.578	4.27169	0.191732	22.2795	5.84083e-110	4.84486e-107	Taar7e
XLOC_031886	464.578	4.27169	0.191732	22.2795	5.84083e-110	4.84486e-107	Taar5
XLOC_031886	464.578	4.27169	0.191732	22.2795	5.84083e-110	4.84486e-107	Taar4
XLOC_031886	464.578	4.27169	0.191732	22.2795	5.84083e-110	4.84486e-107	Dse
XLOC_031886	464.578	4.27169	0.191732	22.2795	5.84083e-110	4.84486e-107	adrb2
XLOC_032597	9.03038	4.269	0.651322	6.55437	5.5877e-11	1.10153e-09
XLOC_035874	19.7598	4.25984	0.576269	7.39209	1.44536e-13	3.66077e-12	unknown
XLOC_017513	5256.61	4.25407	0.381338	11.1557	6.71992e-29	4.55024e-27
XLOC_007782	14.2181	4.247	0.603257	7.04011	1.92086e-12	4.39302e-11
XLOC_057287	8.98764	4.23354	0.644261	6.57117	4.99226e-11	9.90028e-10	C1QTNF5
XLOC_045803	20.457	4.23341	0.544949	7.76845	7.94528e-15	2.21815e-13
XLOC_064437	58.3932	4.23208	0.404915	10.4518	1.43812e-25	8.0769e-24
XLOC_031275	437.978	4.2271	0.490716	8.61414	7.04665e-18	2.48523e-16	s100a1
XLOC_034363	540.847	4.226	0.184377	22.9205	2.90313e-116	3.05416e-113	SPTBN1
XLOC_035850	8881.37	4.22524	0.363311	11.6298	2.90679e-31	2.18429e-29	unknown
XLOC_035850	8881.37	4.22524	0.363311	11.6298	2.90679e-31	2.18429e-29	NOS2
XLOC_012728	628.952	4.22212	0.187643	22.5008	4.07788e-112	3.74237e-109	Nrcam
XLOC_012728	628.952	4.22212	0.187643	22.5008	4.07788e-112	3.74237e-109	NFASC
XLOC_012728	628.952	4.22212	0.187643	22.5008	4.07788e-112	3.74237e-109	Neuronal-glial
XLOC_018063	11.4946	4.21986	0.623371	6.76942	1.29297e-11	2.71386e-10
XLOC_048621	672.078	4.21691	0.165682	25.4518	6.74267e-143	1.32196e-139	CHT1
XLOC_048621	672.078	4.21691	0.165682	25.4518	6.74267e-143	1.32196e-139	41
XLOC_058814	13.8024	4.21638	0.589607	7.15118	8.60351e-13	2.03675e-11	infB
XLOC_036056	39.7935	4.21358	0.441305	9.548	1.3222e-21	5.87941e-20	MMP17
XLOC_021591	15.0594	4.21302	0.586585	7.18228	6.85586e-13	1.63558e-11	SDK2
XLOC_034012	11.56	4.21169	0.615041	6.84783	7.49788e-12	1.61541e-10
XLOC_003608	1337.68	4.20964	0.140214	30.0229	4.93667e-198	1.93576e-194	CSRP1
XLOC_048293	9.64256	4.20915	0.640483	6.57184	4.96985e-11	9.86492e-10	unknown
XLOC_048293	9.64256	4.20915	0.640483	6.57184	4.96985e-11	9.86492e-10	qkib
XLOC_038147	40.6631	4.20197	0.494517	8.49712	1.94348e-17	6.64775e-16
XLOC_050095	56.3591	4.19802	0.456153	9.2031	3.47767e-20	1.42724e-18
XLOC_004535	17.3755	4.19345	0.585922	7.15701	8.24543e-13	1.95842e-11
XLOC_021486	8.80175	4.18799	0.645291	6.49008	8.57916e-11	1.65791e-09	unknown
XLOC_018829	68.9833	4.18542	0.354905	11.7931	4.23818e-32	3.29974e-30	rab5B
XLOC_031182	1016.86	4.18313	0.615105	6.80068	1.0413e-11	2.20709e-10	COMP
XLOC_022450	1709.06	4.17703	0.166095	25.1485	1.46874e-139	2.43659e-136	Nefh
XLOC_022450	1709.06	4.17703	0.166095	25.1485	1.46874e-139	2.43659e-136	gar2
XLOC_022450	1709.06	4.17703	0.166095	25.1485	1.46874e-139	2.43659e-136	Fam65b
XLOC_050310	17.5339	4.17505	0.557006	7.49552	6.60349e-14	1.71377e-12	unknown
XLOC_013714	1284.02	4.17427	0.670836	6.22249	4.89341e-10	8.729e-09	Sox9
XLOC_060341	241.016	4.17032	0.273133	15.2685	1.24035e-52	2.20165e-50	Flnc
XLOC_060341	241.016	4.17032	0.273133	15.2685	1.24035e-52	2.20165e-50	Flna
XLOC_048640	79.4975	4.16792	0.353838	11.7792	4.99881e-32	3.87098e-30	MYO16
XLOC_043640	19.8447	4.16622	0.539551	7.72164	1.14843e-14	3.16115e-13	RFX6
XLOC_031766	29.8027	4.16455	0.508359	8.19215	2.566e-16	8.10836e-15	Dse
XLOC_008284	26.3827	4.16003	0.53964	7.70891	1.26898e-14	3.47965e-13	NDUFB6
XLOC_008284	26.3827	4.16003	0.53964	7.70891	1.26898e-14	3.47965e-13	DOT1L
XLOC_040976	16.2867	4.15911	0.581545	7.15182	8.56317e-13	2.03054e-11
XLOC_051437	20.493	4.15007	0.536403	7.73686	1.01906e-14	2.82125e-13
XLOC_044215	106.019	4.14678	0.311841	13.2977	2.38678e-40	2.64651e-38
XLOC_018331	9.84367	4.14655	0.642977	6.44898	1.12609e-10	2.14728e-09
XLOC_027937	44.5061	4.1423	0.430298	9.62658	6.17475e-22	2.80353e-20	SIAE
XLOC_068564	244.366	4.13882	0.61168	6.76632	1.32098e-11	2.76996e-10
XLOC_039496	50.5172	4.1357	0.470867	8.78315	1.58963e-18	5.87034e-17	DMBX1
XLOC_002073	1469.29	4.1353	0.176013	23.4943	4.66833e-122	5.5933e-119	unknown
XLOC_002073	1469.29	4.1353	0.176013	23.4943	4.66833e-122	5.5933e-119	Sulf2
XLOC_002073	1469.29	4.1353	0.176013	23.4943	4.66833e-122	5.5933e-119	SULF1
XLOC_045090	19.4101	4.13097	0.542165	7.6194	2.54862e-14	6.81522e-13
XLOC_023871	85.8125	4.13038	0.325945	12.672	8.44991e-37	8.0635e-35
XLOC_045324	274.202	4.12972	0.577647	7.14921	8.72813e-13	2.06511e-11
XLOC_013834	10.7695	4.12927	0.622202	6.63654	3.21123e-11	6.50282e-10
XLOC_027222	2912.61	4.1233	0.392164	10.5142	7.42959e-26	4.24451e-24	unknown
XLOC_027222	2912.61	4.1233	0.392164	10.5142	7.42959e-26	4.24451e-24	FREM2
XLOC_015888	120.006	4.12217	0.298491	13.81	2.21794e-43	2.78911e-41
XLOC_009163	15.0355	4.12208	0.587516	7.01612	2.28112e-12	5.17851e-11	unknown
XLOC_053603	191.36	4.11915	0.534925	7.70043	1.35611e-14	3.70445e-13	TM7SF2
XLOC_045767	148.436	4.11706	0.362155	11.3682	6.01904e-30	4.27709e-28	Prss35
XLOC_010340	99.8835	4.11146	0.372598	11.0346	2.60347e-28	1.71968e-26	irx2
XLOC_065466	34.0742	4.10995	0.434062	9.46859	2.83653e-21	1.23459e-19	Sptbn1
XLOC_033059	114.075	4.10646	0.309714	13.2589	4.00905e-40	4.41129e-38	Ak1
XLOC_020737	18.1471	4.09888	0.57662	7.10845	1.17349e-12	2.7375e-11
XLOC_013849	108.088	4.09567	0.377642	10.8454	2.09773e-27	1.31513e-25	Cyp3a2
XLOC_043642	23.2885	4.09075	0.568287	7.19838	6.09315e-13	1.46416e-11	RFX6
XLOC_021443	189.608	4.08692	0.288948	14.1441	2.02982e-45	2.736e-43	Abcc3
XLOC_010668	220.01	4.08004	0.258107	15.8075	2.76071e-56	5.41263e-54	AQP4
XLOC_000519	387.419	4.07893	0.20346	20.0478	2.10809e-89	9.8835e-87	TRIB2
XLOC_046536	15.4825	4.07644	0.592132	6.88435	5.80536e-12	1.26402e-10
XLOC_028316	23.5028	4.07492	0.563856	7.22688	4.94223e-13	1.20233e-11
XLOC_056130	8.13636	4.07189	0.649285	6.27134	3.57946e-10	6.46808e-09
XLOC_042774	195.832	4.06956	0.341038	11.9328	7.97957e-33	6.39745e-31	nonA
XLOC_016742	258.204	4.06883	0.235535	17.2749	7.27514e-67	1.99872e-64	Glutathione
XLOC_018758	727.076	4.06799	0.267654	15.1987	3.60955e-52	6.30326e-50	unknown
XLOC_017501	100.024	4.06332	0.327547	12.4053	2.44634e-35	2.21212e-33	DUSP4
XLOC_019589	887.405	4.05744	0.49787	8.1496	3.65128e-16	1.13712e-14	Sdc4
XLOC_059328	2685.54	4.0534	0.233352	17.3703	1.3844e-67	3.87749e-65	TCN1
XLOC_045804	346.428	4.04597	0.219618	18.4227	8.63355e-76	2.9093e-73	st8sia1
XLOC_017447	22.8577	4.04246	0.540668	7.47679	7.61584e-14	1.96703e-12
XLOC_033712	115.589	4.03849	0.292549	13.8045	2.39513e-43	2.99447e-41
XLOC_003722	742.454	4.03424	0.427586	9.43491	3.91342e-21	1.68798e-19	Sox9
XLOC_030958	863.839	4.02723	0.169408	23.7723	6.45432e-125	8.69982e-122	cdk7
XLOC_059411	142.233	4.02458	0.582278	6.91178	4.78626e-12	1.05222e-10	csgA
XLOC_013516	201.394	4.02322	0.518691	7.75648	8.73184e-15	2.42987e-13	RETN
XLOC_068372	7.70107	4.02192	0.65761	6.11596	9.59766e-10	1.65657e-08
XLOC_015891	28.1213	4.01151	0.478413	8.38503	5.07115e-17	1.68906e-15	GPR98
XLOC_020661	124.453	3.99918	0.310118	12.8956	4.76292e-38	4.85672e-36	EBF3
XLOC_020661	124.453	3.99918	0.310118	12.8956	4.76292e-38	4.85672e-36	ebf2-a
XLOC_020661	124.453	3.99918	0.310118	12.8956	4.76292e-38	4.85672e-36	coe3
XLOC_013609	46.683	3.99813	0.420171	9.51549	1.80867e-21	7.95242e-20	VPS33A
XLOC_013609	46.683	3.99813	0.420171	9.51549	1.80867e-21	7.95242e-20	NDUFA2
XLOC_021569	38.7992	3.99627	0.412119	9.69689	3.10829e-22	1.43852e-20	Ern1
XLOC_004680	36.7226	3.99485	0.426397	9.36885	7.33251e-21	3.11906e-19
XLOC_018731	19.0674	3.99394	0.531751	7.51092	5.87118e-14	1.53109e-12	ARHGAP15
XLOC_040171	231.9	3.9926	0.265675	15.0281	4.8037e-51	8.03092e-49	PRDM8
XLOC_027039	71.7631	3.98865	0.325773	12.2437	1.81674e-34	1.57669e-32	HHIP
XLOC_004534	15.8672	3.98234	0.598816	6.65036	2.92385e-11	5.95159e-10
XLOC_040822	706.4	3.97671	0.53862	7.38314	1.54602e-13	3.90654e-12	Trypsin
XLOC_003801	682.287	3.9656	0.260343	15.2322	2.16082e-52	3.81979e-50
XLOC_018628	90.7545	3.96277	0.324378	12.2165	2.53691e-34	2.19288e-32	unknown
XLOC_012661	213.241	3.95857	0.230399	17.1814	3.6625e-66	9.57422e-64	Pka-R2
XLOC_012884	60.805	3.95428	0.361659	10.9337	7.95106e-28	5.14944e-26	Fam107b
XLOC_056502	25.4616	3.95146	0.51134	7.72765	1.09547e-14	3.02503e-13
XLOC_018627	56.6885	3.95132	0.380986	10.3713	3.34948e-25	1.84748e-23	unknown
XLOC_032938	664.295	3.94454	0.417189	9.45504	3.22898e-21	1.39975e-19	TRAF3IP2
XLOC_021649	117.424	3.93632	0.324399	12.1342	6.96122e-34	5.85299e-32	Mmd2
XLOC_041256	10.0128	3.9328	0.624777	6.29473	3.07942e-10	5.61627e-09
XLOC_060336	18.4673	3.92897	0.550076	7.14258	9.15922e-13	2.16474e-11	Prkcd
XLOC_026925	7.6623	3.92581	0.65448	5.99836	1.99319e-09	3.32581e-08
XLOC_031618	11.2248	3.92189	0.634829	6.17786	6.49747e-10	1.1425e-08
XLOC_009162	8.56838	3.92177	0.645555	6.07505	1.23953e-09	2.11269e-08	unknown
XLOC_013869	397.684	3.91671	0.223446	17.5287	8.65864e-69	2.47333e-66	SRSF5
XLOC_013869	397.684	3.91671	0.223446	17.5287	8.65864e-69	2.47333e-66	MMP21
XLOC_020245	13.8531	3.91634	0.632579	6.19107	5.9757e-10	1.05678e-08
XLOC_003535	17.8732	3.91526	0.549659	7.12307	1.05552e-12	2.47568e-11	NTF3
XLOC_043643	33.805	3.91388	0.512355	7.639	2.18921e-14	5.88332e-13
XLOC_006498	52.5997	3.91134	0.374962	10.4313	1.78415e-25	9.96839e-24	NXPE3
XLOC_045466	43.2632	3.91028	0.51216	7.63489	2.26013e-14	6.06258e-13
XLOC_012877	96.1399	3.90631	0.379298	10.2988	7.1347e-25	3.84676e-23
XLOC_065809	240.467	3.90336	0.278421	14.0196	1.1826e-44	1.55042e-42	Hbegf
XLOC_009153	72.1277	3.90229	0.485803	8.03266	9.53808e-16	2.88099e-14	Casp6
XLOC_000111	10.7601	3.89999	0.619548	6.29489	3.07622e-10	5.61279e-09	DTNB
XLOC_030374	66.5606	3.898	0.351606	11.0863	1.46233e-28	9.7639e-27	UMODL1
XLOC_017612	193.769	3.8946	0.283676	13.7291	6.79988e-43	8.30875e-41	LOXL3
XLOC_041891	38.6041	3.89317	0.419698	9.27613	1.75743e-20	7.33816e-19
XLOC_001897	47.4411	3.88206	0.376564	10.3091	6.4068e-25	3.47603e-23	CTTN1
XLOC_048192	1336.42	3.87975	0.571685	6.78651	1.14878e-11	2.42655e-10	CTSL
XLOC_048192	1336.42	3.87975	0.571685	6.78651	1.14878e-11	2.42655e-10	col4a3bp
XLOC_060339	127.711	3.87718	0.274193	14.1404	2.14198e-45	2.87819e-43	Flnc
XLOC_025431	238.435	3.87657	0.269723	14.3724	7.71243e-47	1.09789e-44	FAM129A
XLOC_000677	10.9631	3.87387	0.616151	6.28721	3.23225e-10	5.87018e-09
XLOC_046745	291.226	3.87326	0.180567	21.4506	4.51165e-102	2.74086e-99	unknown
XLOC_015958	7.37769	3.87239	0.662491	5.8452	5.05963e-09	8.07688e-08	PRR16
XLOC_016275	113.95	3.86222	0.298744	12.9282	3.12036e-38	3.21987e-36
XLOC_005057	43.4452	3.85804	0.407113	9.47658	2.62754e-21	1.14478e-19
XLOC_045848	77.887	3.85777	0.444094	8.68683	3.72701e-18	1.34188e-16
XLOC_016130	14.8014	3.85065	0.560728	6.86723	6.54604e-12	1.41956e-10
XLOC_012093	8.25542	3.84797	0.650011	5.91986	3.22217e-09	5.2565e-08
XLOC_015887	1078.76	3.84574	0.374628	10.2655	1.00797e-24	5.41429e-23	svp
XLOC_006685	116.525	3.84082	0.350146	10.9692	5.37537e-28	3.5183e-26	NR4A1
XLOC_006814	23.8049	3.83448	0.531098	7.2199	5.20249e-13	1.2628e-11	Nxpe2
XLOC_006814	23.8049	3.83448	0.531098	7.2199	5.20249e-13	1.2628e-11	GLRA2
XLOC_009273	1209.03	3.82594	0.161892	23.6327	1.77599e-123	2.32132e-120
XLOC_047768	4472.33	3.82113	0.15113	25.2837	4.83212e-141	8.68432e-138	CEBPB
XLOC_028780	18.5466	3.81472	0.591079	6.45383	1.09055e-10	2.08319e-09
XLOC_014825	11.9051	3.81318	0.610471	6.24629	4.20326e-10	7.55729e-09	CASP7
XLOC_044752	392.351	3.8098	0.166821	22.8376	1.93995e-115	1.90173e-112	Rab27a
XLOC_010616	103.112	3.8082	0.352651	10.7988	3.48856e-27	2.15576e-25	tbx20
XLOC_014039	9.87077	3.80524	0.646231	5.88836	3.90041e-09	6.30808e-08
XLOC_005097	1055.54	3.79743	0.170623	22.2563	9.80892e-110	7.9828e-107
XLOC_053400	147.85	3.79669	0.2807	13.5258	1.10125e-41	1.28033e-39	TMPRSS9
XLOC_044130	22.7553	3.79663	0.556329	6.82442	8.82802e-12	1.88691e-10	unknown
XLOC_050819	18.8875	3.79563	0.557282	6.81097	9.69439e-12	2.06187e-10	GFRA2
XLOC_068987	28.0235	3.79449	0.555686	6.82848	8.58198e-12	1.83705e-10
XLOC_011860	11.0873	3.79368	0.615966	6.15891	7.32489e-10	1.28328e-08	GNG2
XLOC_042008	39.7831	3.79176	0.396911	9.55317	1.25785e-21	5.61643e-20
XLOC_061302	26.9569	3.78785	0.485288	7.80538	5.93244e-15	1.66917e-13	OLFM1
XLOC_032003	29.7161	3.78454	0.468133	8.08432	6.25117e-16	1.90957e-14
XLOC_063335	245.788	3.78365	0.230558	16.4108	1.59957e-60	3.50224e-58	Trpm5
XLOC_031729	56.7494	3.77836	0.422357	8.9459	3.68921e-19	1.43228e-17	Lrrc4b
XLOC_038287	6.67964	3.7779	0.664666	5.68391	1.31651e-08	1.98272e-07
XLOC_030424	237.543	3.7754	0.591286	6.38506	1.71327e-10	3.21718e-09	unknown
XLOC_030424	237.543	3.7754	0.591286	6.38506	1.71327e-10	3.21718e-09	Ceacam1
XLOC_029629	83.6441	3.77436	0.333804	11.3071	1.2099e-29	8.45812e-28	FKBP3
XLOC_027948	14.1972	3.77377	0.55893	6.75178	1.46038e-11	3.0547e-10	sema3aa
XLOC_046864	88.1508	3.7701	0.297184	12.6861	7.06233e-37	6.76932e-35	unknown
XLOC_010295	473.955	3.7563	0.462926	8.11426	4.88765e-16	1.50263e-14	DSC2
XLOC_001906	6.47349	3.75523	0.664325	5.6527	1.57944e-08	2.35404e-07	Nell2
XLOC_001906	6.47349	3.75523	0.664325	5.6527	1.57944e-08	2.35404e-07	nell2
XLOC_051232	1050.68	3.75478	0.168285	22.3121	2.81837e-110	2.38363e-107	CACNA1G
XLOC_039398	84.8374	3.75106	0.368354	10.1833	2.35385e-24	1.22471e-22	opa
XLOC_001702	54.7932	3.74623	0.387047	9.67902	3.70261e-22	1.70443e-20	Mal2
XLOC_051440	330.375	3.746	0.285838	13.1053	3.06895e-39	3.30108e-37
XLOC_040781	10.3232	3.74558	0.636473	5.8849	3.98305e-09	6.4369e-08
XLOC_023955	541.034	3.74399	0.217346	17.226	1.69558e-66	4.51455e-64	TIMP3
XLOC_068174	2341.56	3.74365	0.372507	10.0499	9.19717e-24	4.62356e-22	DSP
XLOC_067821	47.1136	3.74265	0.47891	7.81492	5.49983e-15	1.55252e-13	Sorcs2
XLOC_037035	6.72334	3.74144	0.665297	5.62372	1.8689e-08	2.75971e-07
XLOC_031758	204.211	3.74036	0.337212	11.092	1.3718e-28	9.17359e-27	ANXA5
XLOC_034441	746.378	3.73989	0.425908	8.78097	1.62065e-18	5.97976e-17	Capns1
XLOC_034441	746.378	3.73989	0.425908	8.78097	1.62065e-18	5.97976e-17	CAPN9
XLOC_034441	746.378	3.73989	0.425908	8.78097	1.62065e-18	5.97976e-17	CAPN3
XLOC_015935	51.5159	3.73806	0.471712	7.92445	2.2915e-15	6.69641e-14	ADAMTS7
XLOC_039993	58.0018	3.73673	0.647184	5.77382	7.74947e-09	1.20933e-07	unknown
XLOC_039993	58.0018	3.73673	0.647184	5.77382	7.74947e-09	1.20933e-07	TRYP7
XLOC_002132	14.3895	3.73006	0.609354	6.12132	9.28007e-10	1.60367e-08
XLOC_020698	2003.8	3.72947	0.183714	20.3004	1.2745e-91	6.17677e-89	CYP26C1
XLOC_044794	16.7205	3.72788	0.570085	6.53917	6.18613e-11	1.2134e-09
XLOC_029378	414.935	3.72127	0.261398	14.236	5.47535e-46	7.47368e-44	MEIS3P1
XLOC_029378	414.935	3.72127	0.261398	14.236	5.47535e-46	7.47368e-44	MEIS1
XLOC_029378	414.935	3.72127	0.261398	14.236	5.47535e-46	7.47368e-44	meis1
XLOC_032823	10.9558	3.71911	0.624398	5.95631	2.58002e-09	4.25886e-08
XLOC_012638	2338.08	3.71435	0.168727	22.0139	2.11786e-107	1.60263e-104	ATP2B4
XLOC_012638	2338.08	3.71435	0.168727	22.0139	2.11786e-107	1.60263e-104	ATP2B3
XLOC_026023	58.5554	3.71411	0.437539	8.48862	2.09108e-17	7.13566e-16
XLOC_066501	20.7646	3.69729	0.519394	7.11847	1.09132e-12	2.55271e-11	wif1
XLOC_024957	18.4451	3.69667	0.527481	7.00816	2.41477e-12	5.4704e-11
XLOC_011009	23.6167	3.69383	0.51404	7.18587	6.67796e-13	1.59753e-11
XLOC_029472	2632.28	3.68835	0.206182	17.8888	1.44251e-71	4.44428e-69	LGALS3
XLOC_002842	8.48259	3.6875	0.634707	5.80978	6.25568e-09	9.86207e-08
XLOC_050355	140.975	3.68325	0.268319	13.7271	6.98585e-43	8.51188e-41	TRIM8
XLOC_027221	2680.39	3.68118	0.447155	8.23245	1.83423e-16	5.85609e-15	FREM2
XLOC_007781	10.7511	3.67838	0.630294	5.83597	5.34794e-09	8.51505e-08
XLOC_015056	152.084	3.67766	0.305212	12.0495	1.95039e-33	1.61471e-31	Ldb3
XLOC_038917	123.819	3.67114	0.331736	11.0664	1.82497e-28	1.21476e-26	Sema3d
XLOC_028829	15.8575	3.66922	0.552891	6.63642	3.2139e-11	6.50516e-10	Ramp1
XLOC_017689	493.807	3.66916	0.20921	17.5382	7.32112e-69	2.11934e-66	DPYSL2
XLOC_006813	615.548	3.66883	0.262701	13.9658	2.52082e-44	3.29487e-42	Nxpe2
XLOC_006813	615.548	3.66883	0.262701	13.9658	2.52082e-44	3.29487e-42	GLRA2
XLOC_015590	7.00889	3.66837	0.662888	5.53392	3.13143e-08	4.49927e-07
XLOC_032007	19.431	3.66184	0.592008	6.18545	6.19237e-10	1.09241e-08
XLOC_009895	5.98614	3.65738	0.666582	5.48676	4.09364e-08	5.78163e-07
XLOC_000140	246.525	3.65614	0.659365	5.54493	2.94066e-08	4.24496e-07	PENK
XLOC_000093	20.6555	3.65132	0.522488	6.98833	2.7818e-12	6.25913e-11	MACF1
XLOC_033672	30.7909	3.65081	0.499854	7.30375	2.79851e-13	6.94522e-12	BETA
XLOC_051297	12.4903	3.64664	0.579686	6.29072	3.15999e-10	5.75104e-09
XLOC_038680	430.892	3.64472	0.206271	17.6695	7.19734e-70	2.14099e-67	S-antigen
XLOC_011741	176.307	3.63612	0.208115	17.4717	2.35263e-68	6.63243e-66	unknown
XLOC_011741	176.307	3.63612	0.208115	17.4717	2.35263e-68	6.63243e-66	PLCB1
XLOC_051641	25.432	3.63531	0.460993	7.88582	3.12465e-15	9.02113e-14
XLOC_053401	79.6313	3.63484	0.41328	8.7951	1.42926e-18	5.30078e-17	TMPRSS9
XLOC_061885	100.233	3.62833	0.600713	6.04003	1.54087e-09	2.5972e-08
XLOC_023235	470.463	3.62699	0.245493	14.7743	2.14502e-49	3.34011e-47	PDGFC
XLOC_051006	6.03334	3.62323	0.667751	5.42602	5.76258e-08	7.95892e-07
XLOC_022017	23.8951	3.623	0.591637	6.1237	9.14292e-10	1.58315e-08
XLOC_039376	222.476	3.61837	0.234427	15.4349	9.53267e-54	1.74226e-51
XLOC_039377	111.369	3.61781	0.349926	10.3388	4.70543e-25	2.56911e-23
XLOC_011503	52.6645	3.61305	0.392975	9.19409	3.7819e-20	1.5462e-18	six1
XLOC_034103	23.7967	3.60813	0.490086	7.36223	1.80866e-13	4.54091e-12
XLOC_029623	56.1882	3.60292	0.341214	10.5591	4.60878e-26	2.66475e-24	MDGA2
XLOC_045096	25.8515	3.59239	0.535695	6.70604	1.99972e-11	4.12897e-10	fn1
XLOC_009169	137.291	3.58947	0.259942	13.8087	2.25754e-43	2.83065e-41	gnb1
XLOC_028650	1000.42	3.58253	0.449177	7.97576	1.51443e-15	4.49258e-14	CNR11
XLOC_017955	17.0236	3.58198	0.538982	6.64582	3.01525e-11	6.12609e-10
XLOC_004966	47.417	3.57959	0.454534	7.8753	3.39935e-15	9.79454e-14	EPDR1
XLOC_068523	35.9636	3.57935	0.392076	9.12922	6.89926e-20	2.78378e-18
XLOC_027780	141.667	3.57915	0.293556	12.1924	3.41372e-34	2.92731e-32	SIAE
XLOC_071789	19.9789	3.57725	0.508492	7.03502	1.99227e-12	4.55151e-11
XLOC_060338	839.276	3.57536	0.179427	19.9266	2.3951e-88	1.09902e-85	Flnc
XLOC_037536	23.4314	3.57301	0.466948	7.65184	1.98119e-14	5.33758e-13
XLOC_001121	19.6052	3.5726	0.55506	6.43643	1.22319e-10	2.32832e-09
XLOC_013572	40.145	3.56983	0.424481	8.40988	4.10422e-17	1.37231e-15	COL14A1
XLOC_026338	14.393	3.56849	0.593908	6.00848	1.87268e-09	3.132e-08	abcB1
XLOC_050005	10.7106	3.56485	0.615422	5.79253	6.93323e-09	1.08746e-07	unknown
XLOC_050005	10.7106	3.56485	0.615422	5.79253	6.93323e-09	1.08746e-07	sax-3
XLOC_033623	317.881	3.56382	0.20548	17.3439	2.19372e-67	6.06551e-65	ITGA7
XLOC_007964	605.712	3.56361	0.164409	21.6753	3.51255e-104	2.33087e-101	unknown
XLOC_050354	43.8287	3.5633	0.428871	8.30855	9.68785e-17	3.15371e-15
XLOC_052277	180.489	3.55968	0.222085	16.0284	8.08918e-58	1.66148e-55	Slc9a9
XLOC_005378	149.886	3.55738	0.332048	10.7135	8.80091e-27	5.34661e-25	NMI
XLOC_002109	424.018	3.55661	0.260471	13.6545	1.89697e-42	2.25405e-40	Bmp7
XLOC_026414	236.63	3.55632	0.29255	12.1563	5.31179e-34	4.50125e-32	SLC24A4
XLOC_026414	236.63	3.55632	0.29255	12.1563	5.31179e-34	4.50125e-32	SLC24A3
XLOC_026414	236.63	3.55632	0.29255	12.1563	5.31179e-34	4.50125e-32	Slc24a3
XLOC_013574	67.954	3.54942	0.392316	9.04737	1.46459e-19	5.79031e-18	COL12A1
XLOC_045387	80.1672	3.54931	0.341305	10.3992	2.49984e-25	1.38593e-23
XLOC_023873	1403.83	3.54922	0.168814	21.0245	3.91497e-98	2.19305e-95	unknown
XLOC_033662	1100.57	3.53917	0.623926	5.67242	1.40791e-08	2.11233e-07	unknown
XLOC_017879	8.18063	3.53777	0.665251	5.31794	1.04947e-07	1.39713e-06	NEFM
XLOC_029685	3077.48	3.53349	0.189088	18.6871	6.30884e-78	2.23048e-75	Prx
XLOC_027299	124.934	3.5306	0.297222	11.8787	1.52803e-32	1.20491e-30	ELF2
XLOC_036935	18.0544	3.52521	0.536482	6.57098	4.99847e-11	9.90805e-10	unknown
XLOC_005421	158.671	3.52406	0.227317	15.5028	3.32109e-54	6.14801e-52	Map2
XLOC_004958	335.137	3.52255	0.209266	16.8329	1.40173e-63	3.45489e-61	Zeb2
XLOC_004958	335.137	3.52255	0.209266	16.8329	1.40173e-63	3.45489e-61	2C
XLOC_011440	2586.97	3.5222	0.109941	32.0372	3.31101e-225	2.85628e-221	SYNE1
XLOC_011440	2586.97	3.5222	0.109941	32.0372	3.31101e-225	2.85628e-221	Syne1
XLOC_040803	41.9685	3.52109	0.41554	8.47352	2.38092e-17	8.0927e-16	irx1-b
XLOC_008104	255.207	3.52041	0.245742	14.3256	1.51339e-46	2.11252e-44	LMNA
XLOC_063646	22.7105	3.51714	0.518596	6.78204	1.18494e-11	2.49683e-10
XLOC_018828	59.3592	3.51603	0.332042	10.5891	3.34717e-26	1.94836e-24	unknown
XLOC_043190	39.2286	3.51447	0.41916	8.38455	5.09192e-17	1.69468e-15	WNT7B
XLOC_062326	9.61664	3.51209	0.650857	5.3961	6.81058e-08	9.31684e-07
XLOC_025483	238.188	3.5112	0.207648	16.9094	3.83761e-64	9.62371e-62	COL11A2
XLOC_025483	238.188	3.5112	0.207648	16.9094	3.83761e-64	9.62371e-62	COL11A1
XLOC_025483	238.188	3.5112	0.207648	16.9094	3.83761e-64	9.62371e-62	Col11a1
XLOC_017558	786.49	3.51087	0.547512	6.41241	1.43237e-10	2.70856e-09	SORCS2
XLOC_017558	786.49	3.51087	0.547512	6.41241	1.43237e-10	2.70856e-09	RALBP1
XLOC_046405	371.299	3.5049	0.236927	14.7932	1.62134e-49	2.5523e-47	fth1-b
XLOC_006888	108.685	3.5047	0.259614	13.4996	1.57136e-41	1.81223e-39	KIF28P
XLOC_043972	55.5449	3.50103	0.433936	8.06808	7.141e-16	2.1737e-14
XLOC_012727	15.1001	3.50027	0.530167	6.6022	4.05088e-11	8.12305e-10
XLOC_043261	135.268	3.49223	0.269471	12.9596	2.07406e-38	2.15567e-36
XLOC_034566	226.704	3.49064	0.216662	16.111	2.13613e-58	4.49452e-56	SYT14
XLOC_038918	99.9261	3.49061	0.403853	8.64325	5.46343e-18	1.94916e-16
XLOC_064365	20.536	3.48921	0.529986	6.58359	4.59224e-11	9.16176e-10
XLOC_000318	8.52331	3.48844	0.625674	5.57549	2.46838e-08	3.60056e-07
XLOC_021639	161.611	3.48764	0.310994	11.2145	3.46201e-29	2.37403e-27	TMEM238
XLOC_008105	785.488	3.48574	0.158398	22.0063	2.50687e-107	1.86429e-104	LMNA
XLOC_051185	59.5072	3.48294	0.424685	8.20124	2.3792e-16	7.5402e-15	Cacna1h
XLOC_004330	75.0688	3.48262	0.322198	10.8089	3.12311e-27	1.93826e-25
XLOC_060066	11.7904	3.47917	0.593698	5.86018	4.62373e-09	7.42223e-08	RNF135
XLOC_065182	9.96838	3.47528	0.630601	5.51106	3.56672e-08	5.08574e-07
XLOC_012869	740.269	3.47437	0.137105	25.341	1.13015e-141	2.11943e-138	gnai3
XLOC_012869	740.269	3.47437	0.137105	25.341	1.13015e-141	2.11943e-138	GNAI2
XLOC_024691	127.27	3.47281	0.421076	8.24748	1.61774e-16	5.1841e-15	vwc2l
XLOC_071327	9.03814	3.47236	0.641456	5.41324	6.1893e-08	8.52101e-07
XLOC_042010	18.3734	3.46939	0.609934	5.68814	1.28429e-08	1.93893e-07
XLOC_006819	1126.53	3.46796	0.165125	21.0021	6.28057e-98	3.47308e-95	unknown
XLOC_006819	1126.53	3.46796	0.165125	21.0021	6.28057e-98	3.47308e-95	RARB
XLOC_006819	1126.53	3.46796	0.165125	21.0021	6.28057e-98	3.47308e-95	raraa
XLOC_052276	31.7971	3.4649	0.475851	7.28147	3.30192e-13	8.16171e-12	Slc9a9
XLOC_013790	56.3665	3.46348	0.638208	5.42688	5.73466e-08	7.92545e-07	unknown
XLOC_027701	86.3063	3.46207	0.378579	9.14492	5.96748e-20	2.41459e-18
XLOC_047081	8.40662	3.45705	0.645311	5.35718	8.45289e-08	1.14151e-06
XLOC_026337	24.4626	3.45582	0.515486	6.704	2.0279e-11	4.18114e-10	abcB1
XLOC_011652	18.6321	3.4546	0.528301	6.53908	6.18976e-11	1.21356e-09	HAO1
XLOC_061301	62.8266	3.4543	0.443738	7.78455	6.9961e-15	1.9595e-13	OLFM1
XLOC_060065	17.5121	3.45224	0.558437	6.18197	6.33072e-10	1.11545e-08
XLOC_008037	8.43392	3.45197	0.626482	5.51009	3.58651e-08	5.11057e-07
XLOC_034640	18.8305	3.4501	0.533572	6.46605	1.00596e-10	1.93017e-09
XLOC_002104	661.444	3.44735	0.143639	24	2.77838e-127	3.8658e-124	PLEC
XLOC_002104	661.444	3.44735	0.143639	24	2.77838e-127	3.8658e-124	EVPL
XLOC_050223	31.9661	3.44575	0.547369	6.29512	3.07162e-10	5.60678e-09
XLOC_037526	242.458	3.44446	0.207261	16.619	5.07887e-62	1.17778e-59	MYOM2
XLOC_032824	5.3085	3.44344	0.671363	5.12903	2.91244e-07	3.64969e-06
XLOC_021590	14.0359	3.43993	0.605737	5.67892	1.3555e-08	2.03859e-07	SDK2
XLOC_071153	15.6093	3.43887	0.555635	6.18908	6.05169e-10	1.06979e-08
XLOC_021433	24.5768	3.43441	0.469635	7.31295	2.6135e-13	6.50479e-12
XLOC_001905	5.48959	3.43211	0.671527	5.11091	3.20605e-07	3.99441e-06	NELL1
XLOC_063029	7.93853	3.42783	0.650597	5.26874	1.37361e-07	1.79702e-06	Kif5c
XLOC_038174	11.6967	3.42427	0.611089	5.60356	2.09994e-08	3.08189e-07	SIX1
XLOC_060676	193.435	3.41412	0.312121	10.9385	7.5478e-28	4.89563e-26	unknown
XLOC_005463	2809.3	3.41282	0.342934	9.95185	2.47541e-23	1.21608e-21	TNS
XLOC_005463	2809.3	3.41282	0.342934	9.95185	2.47541e-23	1.21608e-21	TENC1
XLOC_002819	11.992	3.41216	0.593986	5.7445	9.21906e-09	1.42372e-07
XLOC_061756	51.2277	3.41079	0.440149	7.74917	9.2495e-15	2.57061e-13	frrs1
XLOC_006890	7.9927	3.41049	0.649814	5.24841	1.53419e-07	1.99259e-06	KIF28P
XLOC_055593	10.6463	3.40963	0.619631	5.50267	3.74077e-08	5.31284e-07
XLOC_021368	179.172	3.40614	0.284403	11.9764	4.72154e-33	3.84253e-31	Myosin
XLOC_050476	6.90479	3.40349	0.653947	5.20453	1.94485e-07	2.48702e-06	Gria4
XLOC_016439	8.44312	3.4014	0.637017	5.33958	9.31614e-08	1.25182e-06
XLOC_046543	7.49006	3.40058	0.644309	5.27788	1.3069e-07	1.71443e-06
XLOC_027122	44.0742	3.39442	0.416473	8.1504	3.6273e-16	1.13047e-14	Trim2
XLOC_035240	8247.88	3.39091	0.190325	17.8164	5.26988e-71	1.60074e-68	Ppl
XLOC_035240	8247.88	3.39091	0.190325	17.8164	5.26988e-71	1.60074e-68	EVPL
XLOC_035240	8247.88	3.39091	0.190325	17.8164	5.26988e-71	1.60074e-68	decr2
XLOC_035240	8247.88	3.39091	0.190325	17.8164	5.26988e-71	1.60074e-68	Ap4m1
XLOC_057630	78.2866	3.38552	0.323781	10.4562	1.37228e-25	7.71714e-24	Cyp2f2
XLOC_017387	22.517	3.37237	0.499292	6.7543	1.43531e-11	3.00384e-10
XLOC_058815	9.68696	3.37033	0.636089	5.29852	1.16745e-07	1.54654e-06
XLOC_005055	1099.31	3.36871	0.506702	6.64832	2.96463e-11	6.02607e-10
XLOC_031735	105.246	3.3675	0.298561	11.2791	1.66468e-29	1.15624e-27	unknown
XLOC_057005	20.3455	3.36688	0.513936	6.55117	5.70878e-11	1.12437e-09	unknown
XLOC_000844	8.80223	3.36668	0.656048	5.13176	2.87052e-07	3.60029e-06
XLOC_058813	11.4884	3.36659	0.625231	5.38456	7.26207e-08	9.89059e-07	infB
XLOC_003718	123.634	3.36043	0.286744	11.7193	1.01557e-31	7.73931e-30	Tstd3
XLOC_051430	301.455	3.35873	0.272139	12.342	5.38138e-35	4.76622e-33	STK
XLOC_025815	8.45022	3.35514	0.648269	5.17554	2.27257e-07	2.88982e-06
XLOC_021620	16.8169	3.3536	0.547142	6.12931	8.82591e-10	1.534e-08	unknown
XLOC_050007	141.811	3.34931	0.248737	13.4653	2.50413e-41	2.85742e-39	sax-3
XLOC_050007	141.811	3.34931	0.248737	13.4653	2.50413e-41	2.85742e-39	CNTN1
XLOC_008119	427.461	3.34558	0.240448	13.9139	5.21416e-44	6.71351e-42	SHE
XLOC_008119	427.461	3.34558	0.240448	13.9139	5.21416e-44	6.71351e-42	Rasef
XLOC_040165	254.564	3.34547	0.242651	13.7872	3.04552e-43	3.77478e-41	Neurog2
XLOC_007725	7.87964	3.3448	0.65826	5.08127	3.74914e-07	4.62695e-06
XLOC_015044	8.21992	3.34469	0.648163	5.16026	2.46613e-07	3.12489e-06	Synuclein
XLOC_043523	7.51941	3.34444	0.63641	5.25516	1.47893e-07	1.92488e-06
XLOC_016874	1094.29	3.34436	0.22799	14.6689	1.02022e-48	1.56047e-46	ptn-b
XLOC_003461	34.4635	3.34309	0.481307	6.94585	3.76193e-12	8.36409e-11	COL1A1
XLOC_015711	361.604	3.34293	0.307961	10.855	1.88727e-27	1.18664e-25	NTRK2
XLOC_038936	40.7606	3.34139	0.37869	8.82353	1.10903e-18	4.15602e-17	unknown
XLOC_038936	40.7606	3.34139	0.37869	8.82353	1.10903e-18	4.15602e-17	TREX1
XLOC_039548	5.0943	3.34093	0.673112	4.96341	6.92658e-07	8.25544e-06
XLOC_048292	8.53188	3.33444	0.651849	5.11537	3.13132e-07	3.90582e-06	unknown
XLOC_048292	8.53188	3.33444	0.651849	5.11537	3.13132e-07	3.90582e-06	qkib
XLOC_012875	11.4759	3.32838	0.610805	5.44916	5.06081e-08	7.04837e-07	Grm3
XLOC_000496	6.54376	3.32726	0.671044	4.95833	7.11001e-07	8.46236e-06	sh3yl1
XLOC_037186	12.2534	3.32709	0.615176	5.40835	6.36074e-08	8.73751e-07
XLOC_001122	7.87426	3.3267	0.633152	5.25419	1.48674e-07	1.93447e-06
XLOC_067986	147.799	3.32615	0.293834	11.3198	1.04672e-29	7.34114e-28
XLOC_001754	760.715	3.32384	0.198018	16.7855	3.11416e-63	7.58888e-61	unknown
XLOC_001754	760.715	3.32384	0.198018	16.7855	3.11416e-63	7.58888e-61	Emilin1
XLOC_017835	48.3282	3.32208	0.662839	5.0119	5.38956e-07	6.50988e-06
XLOC_007976	13151.4	3.32029	0.187979	17.6631	8.07059e-70	2.38431e-67	DHPS
XLOC_023080	435.577	3.32024	0.285309	11.6373	2.66211e-31	2.00392e-29	DCX
XLOC_023080	435.577	3.32024	0.285309	11.6373	2.66211e-31	2.00392e-29	Dclk1
XLOC_038916	55.2635	3.31847	0.375636	8.83425	1.00769e-18	3.78941e-17	CAV1
XLOC_011764	6.49972	3.31757	0.662591	5.00697	5.52938e-07	6.66757e-06	Lrrc74a
XLOC_021588	50.8304	3.31224	0.413067	8.01864	1.06924e-15	3.20942e-14	SDK1
XLOC_071004	179.73	3.31034	0.578592	5.72138	1.05662e-08	1.61729e-07
XLOC_067503	12.5828	3.30966	0.612042	5.40757	6.38859e-08	8.77017e-07
XLOC_016709	54.7281	3.3067	0.369483	8.94952	3.57034e-19	1.38864e-17	KIAA1549L
XLOC_044781	25.3623	3.30185	0.46358	7.1225	1.05986e-12	2.4845e-11	TICAM2
XLOC_013655	120.275	3.30096	0.357103	9.24372	2.38073e-20	9.80785e-19
XLOC_071028	50.134	3.29854	0.468516	7.04039	1.91697e-12	4.38645e-11
XLOC_038148	41.5201	3.29323	0.400194	8.22908	1.88652e-16	6.01415e-15	TGFB2
XLOC_035237	82.9726	3.2926	0.324124	10.1584	3.03877e-24	1.56784e-22
XLOC_025311	79.1296	3.29228	0.301221	10.9298	8.30425e-28	5.36209e-26
XLOC_061153	11.8305	3.29122	0.594915	5.53225	3.16142e-08	4.54085e-07	Nfasc
XLOC_020248	8.90556	3.28914	0.640798	5.13287	2.8535e-07	3.58207e-06
XLOC_016758	52.2274	3.28819	0.340896	9.64572	5.12524e-22	2.33686e-20	dhdh
XLOC_047427	18.212	3.28538	0.571852	5.74516	9.18321e-09	1.41971e-07	BVES
XLOC_050495	25.0117	3.28397	0.514129	6.38744	1.68682e-10	3.17165e-09	unknown
XLOC_050495	25.0117	3.28397	0.514129	6.38744	1.68682e-10	3.17165e-09	Kiaa1456
XLOC_037134	34.1105	3.28335	0.438345	7.49035	6.86923e-14	1.78166e-12
XLOC_052390	5.75555	3.28079	0.663061	4.94794	7.50047e-07	8.89273e-06
XLOC_033101	6.96539	3.27873	0.668892	4.90173	9.49941e-07	1.11161e-05	ANGPTL2
XLOC_008220	524.205	3.2782	0.150477	21.7854	3.19469e-105	2.22252e-102	Sncaip
XLOC_002196	32.9866	3.27667	0.464976	7.04696	1.82865e-12	4.19549e-11	Trpm5
XLOC_018612	384.109	3.27594	0.238538	13.7334	6.40297e-43	7.84601e-41	dlxC
XLOC_001781	93.9143	3.27494	0.620096	5.28135	1.28239e-07	1.68484e-06	DDB_G0269086
XLOC_013835	81.7251	3.27494	0.395543	8.2796	1.23593e-16	3.99321e-15	GBP7
XLOC_001780	49.8623	3.27429	0.447844	7.31123	2.64709e-13	6.5808e-12	Plec
XLOC_024775	5.43855	3.27134	0.674856	4.84746	1.25054e-06	1.43648e-05
XLOC_064898	6.40557	3.26881	0.654675	4.99302	5.94435e-07	7.14797e-06
XLOC_017411	6.76521	3.26856	0.657479	4.97135	6.64884e-07	7.93757e-06
XLOC_033318	90.4588	3.26743	0.306178	10.6717	1.38087e-26	8.28385e-25
XLOC_061934	7.92201	3.26699	0.639588	5.10795	3.25665e-07	4.04927e-06
XLOC_005433	568.39	3.26647	0.156332	20.8944	6.02113e-97	3.24637e-94	ITGA7
XLOC_023198	22.4478	3.2662	0.453664	7.1996	6.03893e-13	1.45274e-11	Lingo3
XLOC_003305	47.7459	3.26551	0.382979	8.52662	1.50683e-17	5.1788e-16	Tec
XLOC_033496	1617.08	3.26527	0.145421	22.454	1.17014e-111	1.03003e-108	PPP1R9A
XLOC_042826	6.42698	3.26268	0.665416	4.90322	9.42766e-07	1.10351e-05
XLOC_028506	93.3485	3.2617	0.284451	11.4667	1.93973e-30	1.41328e-28	RND2
XLOC_028506	93.3485	3.2617	0.284451	11.4667	1.93973e-30	1.41328e-28	RND1
XLOC_024022	24.2553	3.2617	0.563176	5.79161	6.97149e-09	1.09306e-07	foxj1-b
XLOC_045915	33.6108	3.26115	0.43251	7.54005	4.69799e-14	1.2311e-12	hunk-b
XLOC_003221	756.726	3.25734	0.38829	8.38892	4.9061e-17	1.63536e-15	unknown
XLOC_033102	7.78049	3.25486	0.652931	4.985	6.19631e-07	7.43023e-06	ANGPTL2
XLOC_042616	118.817	3.25019	0.345393	9.41012	4.95584e-21	2.12485e-19	Slc46a2
XLOC_068371	5.46681	3.2499	0.66875	4.85966	1.17586e-06	1.35683e-05
XLOC_060771	12.1544	3.24916	0.618407	5.25409	1.48759e-07	1.93499e-06	Muc2
XLOC_060771	12.1544	3.24916	0.618407	5.25409	1.48759e-07	1.93499e-06	Intestinal
XLOC_016611	17.8617	3.24459	0.540312	6.00503	1.91292e-09	3.19435e-08	kcnq1
XLOC_010330	16.0935	3.2382	0.568446	5.69658	1.22236e-08	1.85126e-07	unknown
XLOC_032668	6.0869	3.2356	0.661822	4.88893	1.01385e-06	1.18063e-05
XLOC_028627	13.9907	3.23333	0.638058	5.06745	4.03176e-07	4.96007e-06	Lrp8
XLOC_000504	22.399	3.22922	0.533264	6.05558	1.39915e-09	2.37409e-08	MAL2
XLOC_028064	1074.9	3.22476	0.163908	19.6742	3.58883e-86	1.53264e-83	bgn
XLOC_044142	976.423	3.22323	0.168921	19.0813	3.61139e-81	1.3908e-78	Plscr3
XLOC_069663	80.2249	3.22279	0.299428	10.7632	5.13786e-27	3.14342e-25
XLOC_021568	227.507	3.22206	0.241516	13.341	1.33712e-40	1.50193e-38	Ern1
XLOC_002014	55.3526	3.22177	0.387931	8.30501	9.98126e-17	3.24188e-15	NKAIN2
XLOC_011464	40.6422	3.21801	0.408566	7.87637	3.37031e-15	9.72385e-14	RGS7
XLOC_011464	40.6422	3.21801	0.408566	7.87637	3.37031e-15	9.72385e-14	Rgs7
XLOC_025225	7.83414	3.20698	0.640822	5.00447	5.60147e-07	6.75072e-06
XLOC_018503	289.691	3.20667	0.258741	12.3933	2.83936e-35	2.56214e-33	unknown
XLOC_018503	289.691	3.20667	0.258741	12.3933	2.83936e-35	2.56214e-33	BMPER
XLOC_018503	289.691	3.20667	0.258741	12.3933	2.83936e-35	2.56214e-33	Bmper
XLOC_050378	8.69838	3.20339	0.662252	4.83712	1.31734e-06	1.50759e-05
XLOC_015805	7717.82	3.20334	0.209619	15.2817	1.01285e-52	1.80526e-50	S100A1
XLOC_019746	7.81421	3.20152	0.652475	4.90673	9.2607e-07	1.08426e-05	ADCY8
XLOC_019746	7.81421	3.20152	0.652475	4.90673	9.2607e-07	1.08426e-05	ADCY5
XLOC_004963	33.9084	3.20094	0.405684	7.89022	3.01655e-15	8.7207e-14	unknown
XLOC_019507	77.7221	3.20083	0.349101	9.16878	4.78404e-20	1.94486e-18	ARHGAP18
XLOC_015893	12.3485	3.19876	0.592993	5.39426	6.88053e-08	9.40063e-07	GPR98
XLOC_003316	148.778	3.1969	0.246139	12.9882	1.42814e-38	1.49153e-36	PKIA
XLOC_023349	25.597	3.19592	0.457477	6.98596	2.8292e-12	6.36245e-11	Nbea
XLOC_068230	40.4984	3.19317	0.494413	6.45851	1.05741e-10	2.02169e-09
XLOC_027259	98.8265	3.19094	0.402064	7.93641	2.08118e-15	6.1108e-14	PDE2A
XLOC_036936	822.189	3.18974	0.149203	21.3785	2.11799e-101	1.26882e-98	unknown
XLOC_062628	19.722	3.18799	0.486868	6.54796	5.83282e-11	1.14723e-09
XLOC_048304	2556.29	3.187	0.14737	21.6258	1.02697e-103	6.6114e-101	crabp2
XLOC_039375	69.9797	3.18439	0.338919	9.39573	5.68224e-21	2.42665e-19	Gdnf
XLOC_032002	12.4728	3.18188	0.583284	5.4551	4.89439e-08	6.83203e-07
XLOC_005346	293.94	3.18174	0.465936	6.8287	8.56854e-12	1.83509e-10	slc12a8
XLOC_023613	25.7244	3.18075	0.461838	6.88716	5.69161e-12	1.24113e-10
XLOC_031512	10.1222	3.17905	0.589435	5.39339	6.91414e-08	9.44056e-07
XLOC_039547	27.6189	3.17873	0.467824	6.79471	1.08527e-11	2.2969e-10
XLOC_000165	47.9303	3.17764	0.41838	7.59511	3.07542e-14	8.19345e-13	Smpdl3b
XLOC_000165	47.9303	3.17764	0.41838	7.59511	3.07542e-14	8.19345e-13	fkbp1a
XLOC_063142	20.3216	3.1728	0.554952	5.71726	1.08258e-08	1.6535e-07
XLOC_013312	224.083	3.17242	0.21107	15.0302	4.65685e-51	7.81571e-49
XLOC_033711	229.353	3.17178	0.252167	12.5781	2.78614e-36	2.59557e-34
XLOC_000026	253.078	3.17037	0.301608	10.5116	7.64096e-26	4.35949e-24	DCDC2B
XLOC_068628	4.86967	3.16997	0.673016	4.7101	2.47596e-06	2.73905e-05
XLOC_013169	17.2391	3.16942	0.561866	5.64088	1.69181e-08	2.5137e-07
XLOC_007002	7.1784	3.16853	0.64542	4.90926	9.14215e-07	1.07125e-05	FMNL2
XLOC_042818	4.94026	3.16827	0.672442	4.71159	2.45791e-06	2.72118e-05	unknown
XLOC_005236	44.607	3.1664	0.660428	4.79446	1.6311e-06	1.84657e-05	ITGB1
XLOC_054219	6.34088	3.16541	0.660377	4.79334	1.64026e-06	1.85597e-05	unknown
XLOC_052275	52.372	3.16442	0.34192	9.25484	2.14546e-20	8.88956e-19	Slc9a9
XLOC_052275	52.372	3.16442	0.34192	9.25484	2.14546e-20	8.88956e-19	Ice-structuring
XLOC_058028	17.5508	3.16379	0.533819	5.92671	3.09059e-09	5.0514e-08	PSD
XLOC_046765	181.257	3.15992	0.280731	11.256	2.16283e-29	1.49983e-27	Oit3
XLOC_051235	14.7313	3.15733	0.573805	5.50244	3.74571e-08	5.31634e-07	CACNA1I
XLOC_003772	609.737	3.15479	0.219831	14.351	1.0507e-46	1.47622e-44	GRIA4
XLOC_065141	11.3132	3.1529	0.576281	5.47112	4.47202e-08	6.28108e-07
XLOC_011814	4.7313	3.1529	0.675704	4.6661	3.06965e-06	3.33593e-05
XLOC_062860	7.97056	3.15078	0.626345	5.03043	4.8938e-07	5.94436e-06
XLOC_009373	76.3648	3.14738	0.339506	9.27047	1.85329e-20	7.71603e-19	txn
XLOC_046598	9.51375	3.14691	0.615754	5.11066	3.21036e-07	3.99862e-06
XLOC_009227	5.48558	3.14531	0.671288	4.68549	2.79287e-06	3.05826e-05	ccdc64
XLOC_030340	76.9192	3.14339	0.32671	9.62133	6.4987e-22	2.94751e-20	unknown
XLOC_030340	76.9192	3.14339	0.32671	9.62133	6.4987e-22	2.94751e-20	Scn2b
XLOC_049239	99.5398	3.1431	0.319361	9.84186	7.43244e-23	3.57794e-21	TNF
XLOC_007996	492.394	3.14096	0.433527	7.24513	4.32036e-13	1.05761e-11	DUOX1
XLOC_030982	40.8428	3.14055	0.45012	6.97714	3.01244e-12	6.74288e-11	Cp1
XLOC_033588	5.78727	3.13667	0.668384	4.69291	2.6934e-06	2.95835e-05	SP9
XLOC_003900	5.18563	3.13496	0.670752	4.6738	2.95676e-06	3.22349e-05	BCAM
XLOC_015859	29.787	3.13423	0.460417	6.80737	9.93971e-12	2.11197e-10	MYZAP
XLOC_048643	9.32091	3.13087	0.621023	5.04147	4.61962e-07	5.63512e-06
XLOC_064832	5.54422	3.12784	0.658302	4.75137	2.02043e-06	2.26063e-05
XLOC_051234	88.0073	3.12536	0.402845	7.75821	8.61336e-15	2.40155e-13	CACNA1I
XLOC_051234	88.0073	3.12536	0.402845	7.75821	8.61336e-15	2.40155e-13	Cacna1h
XLOC_025353	11.3217	3.12534	0.591257	5.28591	1.25079e-07	1.64583e-06
XLOC_031496	27.1347	3.12421	0.468765	6.66475	2.65111e-11	5.42201e-10
XLOC_010511	27.3463	3.12181	0.533091	5.85606	4.73987e-09	7.60018e-08	unknown
XLOC_005624	14.9469	3.11926	0.592971	5.2604	1.43744e-07	1.87485e-06
XLOC_032878	27.256	3.11826	0.518189	6.0176	1.77024e-09	2.96873e-08
XLOC_047807	130.515	3.11708	0.306472	10.1708	2.67635e-24	1.38416e-22	unknown
XLOC_063532	31.6956	3.11643	0.577268	5.39858	6.71688e-08	9.20036e-07	SNAP25
XLOC_036934	133.731	3.11592	0.26221	11.8833	1.44515e-32	1.14374e-30	unknown
XLOC_016537	22.7153	3.11522	0.525335	5.92996	3.03017e-09	4.95828e-08
XLOC_027791	17.7522	3.11212	0.556665	5.59065	2.26219e-08	3.31099e-07	unknown
XLOC_027791	17.7522	3.11212	0.556665	5.59065	2.26219e-08	3.31099e-07	has2
XLOC_009142	410.689	3.11005	0.206324	15.0736	2.41541e-51	4.11794e-49	Vsig2
XLOC_000520	20.4318	3.10891	0.583399	5.32896	9.87764e-08	1.32232e-06	PKIA
XLOC_011794	1589.48	3.10843	0.454473	6.83964	7.93933e-12	1.70626e-10	Tlr5
XLOC_047151	68.3337	3.10498	0.360405	8.61523	6.98022e-18	2.46583e-16	Cacna2d4
XLOC_027807	6.94621	3.10298	0.672634	4.61319	3.96539e-06	4.22946e-05	unknown
XLOC_013226	138.732	3.10125	0.281787	11.0056	3.58956e-28	2.36019e-26
XLOC_058063	66.9596	3.09983	0.335336	9.24395	2.37565e-20	9.79627e-19	ST3GAL5
XLOC_035849	4.69645	3.09866	0.676304	4.58176	4.61087e-06	4.86499e-05
XLOC_058932	7.42937	3.09863	0.654709	4.73284	2.21395e-06	2.46627e-05	unknown
XLOC_066473	8.32372	3.09804	0.67169	4.61231	3.98215e-06	4.24524e-05
XLOC_008157	31.118	3.09722	0.402121	7.70219	1.33752e-14	3.6583e-13	GARP
XLOC_041886	12.1668	3.09717	0.592664	5.22584	1.73369e-07	2.23289e-06
XLOC_041954	12.8274	3.09506	0.569103	5.43849	5.37339e-08	7.45748e-07
XLOC_031246	201.365	3.09453	0.33725	9.17578	4.48312e-20	1.82425e-18	NR2F1
XLOC_039876	18.0156	3.09219	0.544016	5.684	1.3158e-08	1.98234e-07
XLOC_027288	364.578	3.09143	0.205647	15.0327	4.48302e-51	7.55336e-49	unknown
XLOC_012949	75.1099	3.09022	0.305584	10.1125	4.8632e-24	2.47949e-22	Cadps
XLOC_024047	77.4128	3.08851	0.333798	9.25262	2.19047e-20	9.05862e-19
XLOC_025103	43.4945	3.08793	0.466266	6.62268	3.52756e-11	7.11333e-10
XLOC_029372	8.20414	3.08567	0.626008	4.92912	8.2601e-07	9.73717e-06
XLOC_040159	169.248	3.08246	0.247192	12.4699	1.08982e-35	9.9171e-34	CDS2
XLOC_056720	46.0643	3.07937	0.428047	7.194	6.29219e-13	1.50946e-11	notch1
XLOC_056720	46.0643	3.07937	0.428047	7.194	6.29219e-13	1.50946e-11	N
XLOC_056720	46.0643	3.07937	0.428047	7.194	6.29219e-13	1.50946e-11	Muc4
XLOC_002105	82.3345	3.07868	0.294296	10.4612	1.30264e-25	7.35432e-24	PLEC
XLOC_001287	6.14809	3.07761	0.662636	4.6445	3.40907e-06	3.67727e-05
XLOC_003705	214.122	3.07521	0.222574	13.8166	2.02459e-43	2.55341e-41	Ctgf
XLOC_010471	18.5657	3.07512	0.508299	6.04982	1.45005e-09	2.45564e-08
XLOC_021530	32.3767	3.07387	0.560478	5.48436	4.14965e-08	5.85307e-07	MYH3
XLOC_014919	106.1	3.07313	0.258142	11.9048	1.11729e-32	8.88832e-31	SLC4A4
XLOC_014919	106.1	3.07313	0.258142	11.9048	1.11729e-32	8.88832e-31	Slc4a4
XLOC_018560	420.231	3.07061	0.155437	19.7547	7.30195e-87	3.18136e-84	Zcwpw2
XLOC_018560	420.231	3.07061	0.155437	19.7547	7.30195e-87	3.18136e-84	RBMS1
XLOC_052266	2061.24	3.07034	0.112754	27.2306	2.82484e-163	8.70314e-160	LEGB
XLOC_009243	640.402	3.06866	0.209476	14.6492	1.36214e-48	2.06151e-46	Dtx4
XLOC_061542	246.803	3.06604	0.220309	13.917	4.99409e-44	6.4494e-42	cyc
XLOC_049205	23.6689	3.06545	0.457645	6.69833	2.1082e-11	4.3384e-10	MATN2
XLOC_027261	53.9112	3.06485	0.375828	8.15493	3.49376e-16	1.08963e-14	ZDHHC12
XLOC_017514	7.06854	3.06465	0.63717	4.80978	1.51094e-06	1.7182e-05
XLOC_060870	43.5932	3.06422	0.406027	7.54685	4.45914e-14	1.17064e-12
XLOC_028733	488.566	3.06362	0.223305	13.7194	7.76669e-43	9.43664e-41	ERBB4
XLOC_049343	39.3735	3.06252	0.383805	7.97936	1.47092e-15	4.37554e-14	COL5A1
XLOC_027002	79.3706	3.06144	0.355393	8.61424	7.04047e-18	2.48508e-16	ATP7A
XLOC_071034	55.0253	3.0613	0.344415	8.88841	6.19899e-19	2.36202e-17
XLOC_046245	385.666	3.05928	0.191782	15.9519	2.76537e-57	5.52216e-55	unknown
XLOC_015012	35.9727	3.05826	0.475748	6.42832	1.29021e-10	2.45156e-09	T01B11.2
XLOC_017262	6.04128	3.05503	0.673732	4.53448	5.77456e-06	5.98736e-05
XLOC_028782	476.436	3.05266	0.677781	4.5039	6.67164e-06	6.84836e-05	WNT3
XLOC_072138	82.6657	3.04626	0.673783	4.52113	6.15098e-06	6.35321e-05
XLOC_019747	12.6494	3.04026	0.583969	5.20621	1.92741e-07	2.46545e-06	ADCY5
XLOC_019317	27.7308	3.04016	0.510231	5.9584	2.54713e-09	4.20939e-08
XLOC_016792	151.957	3.03994	0.312465	9.7289	2.27027e-22	1.06439e-20	SIGIRR
XLOC_008412	1247.55	3.03837	0.202097	15.0342	4.38427e-51	7.41595e-49	unknown
XLOC_008412	1247.55	3.03837	0.202097	15.0342	4.38427e-51	7.41595e-49	MEGF6
XLOC_008412	1247.55	3.03837	0.202097	15.0342	4.38427e-51	7.41595e-49	CSK
XLOC_000196	17.5545	3.03242	0.517785	5.85652	4.72673e-09	7.58193e-08	IL13RA2
XLOC_065722	151.876	3.03212	0.301036	10.0723	7.32592e-24	3.71315e-22
XLOC_042235	740.113	3.0313	0.134605	22.5201	2.64012e-112	2.47558e-109	Trim9
XLOC_027316	118.19	3.02994	0.261843	11.5716	5.73827e-31	4.23816e-29	SV2A
XLOC_006542	13.8933	3.02922	0.62209	4.86941	1.11929e-06	1.29607e-05	Gal3st1
XLOC_016793	29.647	3.02451	0.417293	7.24794	4.23166e-13	1.03766e-11	SIGIRR
XLOC_061778	14.9683	3.02309	0.629478	4.80254	1.56665e-06	1.77827e-05
XLOC_025484	453.466	3.02287	0.203262	14.8718	5.02457e-50	8.05668e-48	COL11A2
XLOC_062183	12.1798	3.02214	0.573661	5.26817	1.37792e-07	1.80212e-06
XLOC_038935	117.04	3.02029	0.287064	10.5213	6.89187e-26	3.94253e-24
XLOC_065559	11.1666	3.01882	0.602261	5.01248	5.37323e-07	6.49197e-06
XLOC_069235	21.1403	3.0186	0.524974	5.75	8.92428e-09	1.38216e-07
XLOC_011829	2749.21	3.01738	0.203996	14.7913	1.66614e-49	2.6133e-47	SLC22A7
XLOC_011829	2749.21	3.01738	0.203996	14.7913	1.66614e-49	2.6133e-47	Calpain-1
XLOC_056723	24.4089	3.00709	0.443152	6.78569	1.15532e-11	2.43798e-10
XLOC_058241	14.83	3.00614	0.539659	5.57045	2.54083e-08	3.69625e-07
XLOC_046272	18.2711	3.00546	0.58752	5.1155	3.12909e-07	3.90448e-06	Nlgn4l
XLOC_029655	18.0236	3.00531	0.512058	5.86909	4.38204e-09	7.04212e-08	unknown
XLOC_015748	152.33	3.00513	0.255045	11.7828	4.78965e-32	3.72237e-30	Rai14
XLOC_005054	1248.88	3.00507	0.256226	11.7282	9.13948e-32	6.97722e-30	CXCL8
XLOC_062182	8.46014	3.00374	0.617592	4.86363	1.1525e-06	1.33166e-05
XLOC_020533	729.707	3.00299	0.633049	4.74369	2.09857e-06	2.3438e-05	egr1-b
XLOC_014889	51.8603	3.00171	0.399442	7.51477	5.7013e-14	1.48768e-12	tdcB
XLOC_057108	307.71	2.9991	0.20948	14.3169	1.71677e-46	2.38869e-44	Capn5
XLOC_009406	1318.23	2.9987	0.178286	16.8196	1.75299e-63	4.29613e-61	unknown
XLOC_057183	20.5618	2.99803	0.470105	6.37735	1.80173e-10	3.3774e-09	XPNPEP2
XLOC_043681	14.819	2.99589	0.56798	5.27464	1.33016e-07	1.74389e-06
XLOC_035135	4.24221	2.99466	0.677224	4.42197	9.78068e-06	9.78136e-05	MATN3
XLOC_028602	4.41083	2.99024	0.673402	4.4405	8.97514e-06	9.03231e-05
XLOC_053253	580.417	2.98816	0.158692	18.8299	4.29174e-79	1.58218e-76
XLOC_050820	5.50594	2.98553	0.670501	4.45268	8.48031e-06	8.56832e-05	GFRA2
XLOC_046482	20.086	2.98423	0.55576	5.36964	7.88933e-08	1.07043e-06
XLOC_001893	164.516	2.98335	0.24104	12.377	3.4828e-35	3.12966e-33	Dera
XLOC_054922	454.668	2.97728	0.181823	16.3746	2.90285e-60	6.29188e-58	ZFHX4
XLOC_054922	454.668	2.97728	0.181823	16.3746	2.90285e-60	6.29188e-58	ZFHX3
XLOC_054922	454.668	2.97728	0.181823	16.3746	2.90285e-60	6.29188e-58	ZFHX2
XLOC_054922	454.668	2.97728	0.181823	16.3746	2.90285e-60	6.29188e-58	unknown
XLOC_036659	522.162	2.97706	0.241124	12.3466	5.08201e-35	4.52897e-33	B3GNT3
XLOC_044357	4.28582	2.97669	0.675177	4.40876	1.03967e-05	0.000103375
XLOC_005444	247.287	2.9751	0.201653	14.7536	2.91682e-49	4.52558e-47
XLOC_044669	6.74627	2.97065	0.643478	4.61656	3.90156e-06	4.16756e-05	lysmd4
XLOC_044669	6.74627	2.97065	0.643478	4.61656	3.90156e-06	4.16756e-05	COL6A3
XLOC_011848	4.17485	2.9706	0.677211	4.38653	1.15174e-05	0.000113679	ORF73
XLOC_048642	51.468	2.97034	0.344759	8.61568	6.95254e-18	2.45807e-16	MYO16
XLOC_048642	51.468	2.97034	0.344759	8.61568	6.95254e-18	2.45807e-16	Myo16
XLOC_036719	26.4543	2.96893	0.467822	6.34627	2.20596e-10	4.09422e-09	Pigp
XLOC_036719	26.4543	2.96893	0.467822	6.34627	2.20596e-10	4.09422e-09	Mmp23
XLOC_068652	454.452	2.96712	0.274218	10.8203	2.75984e-27	1.72024e-25
XLOC_014911	4.67733	2.96649	0.674396	4.39874	1.08881e-05	0.000107814	Drgx
XLOC_018504	938.266	2.96579	0.205465	14.4345	3.13837e-47	4.54253e-45	BMPER
XLOC_061627	101.447	2.96566	0.306643	9.6714	3.98887e-22	1.83034e-20
XLOC_031067	6.69129	2.96558	0.654676	4.52984	5.90276e-06	6.11147e-05	ANKDD1A
XLOC_039607	320.156	2.96537	0.272622	10.8772	1.48012e-27	9.38852e-26	GLRX
XLOC_035238	65.6116	2.9623	0.439008	6.74771	1.50194e-11	3.13416e-10
XLOC_054031	207.23	2.96184	0.240806	12.2997	9.09048e-35	7.9695e-33	Tlr13
XLOC_065144	7.29681	2.96121	0.630822	4.6942	2.67655e-06	2.9406e-05	Tmem179
XLOC_051559	59.0047	2.9611	0.345298	8.57549	9.86625e-18	3.42918e-16
XLOC_038702	27.2105	2.95465	0.538585	5.48594	4.1127e-08	5.80475e-07
XLOC_023120	397.821	2.95375	0.184778	15.9854	1.61638e-57	3.27321e-55	IRG1
XLOC_023120	397.821	2.95375	0.184778	15.9854	1.61638e-57	3.27321e-55	Cln5
XLOC_028787	26.4534	2.94905	0.513113	5.74737	9.06408e-09	1.4018e-07
XLOC_030360	13.3301	2.94766	0.607597	4.85134	1.22631e-06	1.41165e-05	PLA1A
XLOC_036881	116.111	2.94656	0.379287	7.76869	7.93018e-15	2.21536e-13	Pigp
XLOC_036881	116.111	2.94656	0.379287	7.76869	7.93018e-15	2.21536e-13	MMP23
XLOC_040210	182.937	2.94417	0.252344	11.6673	1.87319e-31	1.41997e-29	Areg
XLOC_016565	132.899	2.93907	0.328892	8.93627	4.02512e-19	1.55849e-17	rassf10
XLOC_067747	74.7371	2.93882	0.273889	10.73	7.3613e-27	4.48467e-25
XLOC_043351	148.122	2.9373	0.289988	10.129	4.1067e-24	2.09875e-22	unknown
XLOC_050177	7.60675	2.93601	0.642381	4.57051	4.86545e-06	5.1086e-05
XLOC_023343	83.0004	2.93389	0.339762	8.63513	5.86594e-18	2.08759e-16	unknown
XLOC_023343	83.0004	2.93389	0.339762	8.63513	5.86594e-18	2.08759e-16	Dchs1
XLOC_017640	251.526	2.93249	0.210978	13.8995	6.37858e-44	8.13986e-42	PARP9
XLOC_060444	15.4472	2.93029	0.52401	5.59205	2.24404e-08	3.28666e-07	SCRT1
XLOC_054857	64.1068	2.93007	0.327616	8.94362	3.76617e-19	1.46085e-17
XLOC_010361	148.299	2.92916	0.22911	12.7849	1.99029e-37	1.96897e-35	Guanine
XLOC_010361	148.299	2.92916	0.22911	12.7849	1.99029e-37	1.96897e-35	GNAO1
XLOC_010361	148.299	2.92916	0.22911	12.7849	1.99029e-37	1.96897e-35	gna0
XLOC_030423	350.077	2.92549	0.632162	4.62776	3.69641e-06	3.9661e-05	Ceacam2
XLOC_005312	7.19471	2.92437	0.646536	4.52314	6.09294e-06	6.29779e-05	STOM
XLOC_015404	5.55786	2.92141	0.658726	4.43494	9.20994e-06	9.24703e-05
XLOC_046854	21.9086	2.92055	0.562522	5.1919	2.08164e-07	2.65486e-06	unknown
XLOC_024857	21.7379	2.92019	0.545696	5.35132	8.73171e-08	1.17806e-06	slc6a9
XLOC_046540	7.50493	2.91926	0.660272	4.4213	9.81109e-06	9.80495e-05
XLOC_028638	12.0427	2.91883	0.576851	5.05993	4.19418e-07	5.14381e-06	Myo10
XLOC_012729	88.012	2.91504	0.369526	7.88861	3.05582e-15	8.8283e-14	Cntn2
XLOC_043709	27.3844	2.91345	0.483442	6.02648	1.6757e-09	2.81785e-08	Mrap2
XLOC_024117	21.1857	2.91263	0.484093	6.01668	1.7803e-09	2.98444e-08	PIK3CG
XLOC_032260	15.9709	2.91215	0.56058	5.19489	2.04842e-07	2.61404e-06	mc4r
XLOC_003730	286.083	2.91191	0.243746	11.9465	6.77326e-33	5.45057e-31	Foxj1
XLOC_005061	7.91268	2.9116	0.626753	4.64553	3.39211e-06	3.66055e-05	VWDE
XLOC_018517	471.253	2.90938	0.210504	13.821	1.90346e-43	2.41476e-41	SEMA5B
XLOC_018517	471.253	2.90938	0.210504	13.821	1.90346e-43	2.41476e-41	SEMA5A
XLOC_003726	51.3259	2.90846	0.358818	8.10567	5.24552e-16	1.61035e-14
XLOC_000401	24.4546	2.90727	0.560284	5.18893	2.11507e-07	2.6959e-06	BAI3
XLOC_000401	24.4546	2.90727	0.560284	5.18893	2.11507e-07	2.6959e-06	BAI1
XLOC_000401	24.4546	2.90727	0.560284	5.18893	2.11507e-07	2.6959e-06	Alanine
XLOC_005041	95.6923	2.90528	0.291428	9.96911	2.08095e-23	1.0258e-21	plcd4
XLOC_005041	95.6923	2.90528	0.291428	9.96911	2.08095e-23	1.0258e-21	CCDC47
XLOC_011465	71.2434	2.90267	0.394527	7.35735	1.87599e-13	4.70175e-12	Rgs7
XLOC_048644	14.753	2.90246	0.521642	5.56409	2.63529e-08	3.82721e-07	NLGN1
XLOC_048644	14.753	2.90246	0.521642	5.56409	2.63529e-08	3.82721e-07	Nlgn1
XLOC_064436	19.1568	2.90127	0.543002	5.34303	9.1407e-08	1.22939e-06
XLOC_042236	89.1777	2.90029	0.37208	7.7948	6.45125e-15	1.80924e-13	TRIM9
XLOC_012950	39.2821	2.90023	0.413094	7.02075	2.20673e-12	5.02285e-11	CADPS
XLOC_054799	21.2257	2.89688	0.506828	5.71572	1.09242e-08	1.66618e-07	SWP2
XLOC_046402	4.28345	2.89646	0.675026	4.29089	1.7796e-05	0.000170448	Dmbt1
XLOC_056721	6.25635	2.89612	0.649821	4.4568	8.31926e-06	8.41545e-05	notch1
XLOC_058208	12.1572	2.89295	0.59476	4.86406	1.15e-06	1.32912e-05
XLOC_058915	122.228	2.89072	0.294793	9.80592	1.06171e-22	5.07139e-21	unknown
XLOC_041952	3.92407	2.88951	0.677474	4.26512	1.99795e-05	0.000189986
XLOC_049342	350.57	2.88846	0.150628	19.1761	5.86347e-82	2.32027e-79	COL5A1
XLOC_027808	40.2381	2.88845	0.673215	4.29054	1.7824e-05	0.000170656	unknown
XLOC_043349	3.96112	2.88708	0.677406	4.26197	2.02637e-05	0.000192306	unknown
XLOC_052079	1211.28	2.88082	0.199954	14.4074	4.64871e-47	6.66156e-45
XLOC_025414	4.56042	2.87841	0.675124	4.26353	2.01219e-05	0.000191087	SH3GLB1
XLOC_017691	4.39608	2.87841	0.676884	4.25244	2.11452e-05	0.000200012	DPYSL2
XLOC_040977	5.12153	2.87761	0.665438	4.32438	1.52959e-05	0.000148594
XLOC_002859	4.16424	2.87697	0.677472	4.24663	2.1701e-05	0.000204839
XLOC_019506	51.2854	2.87581	0.374208	7.68507	1.52914e-14	4.1508e-13	ARHGAP18
XLOC_017690	6.06125	2.87576	0.663035	4.33726	1.44269e-05	0.000140564	DPYSL2
XLOC_064159	5.82179	2.87451	0.657465	4.37211	1.23052e-05	0.000120847
XLOC_043199	22.161	2.87367	0.569514	5.04583	4.51547e-07	5.51901e-06	unknown
XLOC_024133	11.2156	2.87357	0.625084	4.59709	4.28431e-06	4.54712e-05	ADRB1
XLOC_013796	12.5982	2.87318	0.580337	4.95088	7.38793e-07	8.77136e-06	Gipr
XLOC_014824	1113.17	2.87304	0.167019	17.2019	2.56884e-66	6.75621e-64	pax2a
XLOC_007960	94.1745	2.87277	0.27344	10.506	8.10505e-26	4.61816e-24	unknown
XLOC_024834	299.43	2.87178	0.29804	9.63554	5.65926e-22	2.57219e-20	Dhcr24
XLOC_043192	60.0725	2.87163	0.367273	7.8188	5.3329e-15	1.50638e-13
XLOC_040425	18.9822	2.87157	0.55821	5.14424	2.68613e-07	3.38378e-06
XLOC_017708	123.835	2.86912	0.316878	9.05433	1.37411e-19	5.44256e-18	DNMBP
XLOC_055539	684.898	2.86889	0.198417	14.4589	2.20321e-47	3.1997e-45	ALOX5
XLOC_003014	5.23116	2.86871	0.67379	4.25757	2.06661e-05	0.000195867
XLOC_022095	5.6073	2.86427	0.664682	4.30923	1.63824e-05	0.000158222
XLOC_015786	272.458	2.86354	0.18166	15.7632	5.57511e-56	1.0832e-53	Npr3
XLOC_023284	37.2207	2.86311	0.670029	4.27312	1.92759e-05	0.0001837	Gpm6b
XLOC_068373	4.16391	2.86176	0.67658	4.22974	2.3396e-05	0.000219474
XLOC_039504	19.5403	2.86106	0.500914	5.71168	1.11867e-08	1.7038e-07	Leprotl1
XLOC_030373	85.321	2.86086	0.292338	9.78613	1.29144e-22	6.13478e-21	unknown
XLOC_001834	9.61248	2.86082	0.639728	4.47194	7.75149e-06	7.87435e-05	RAPSN
XLOC_043493	47.0955	2.85916	0.377438	7.5752	3.58577e-14	9.50031e-13
XLOC_037961	8.03051	2.85872	0.649993	4.39808	1.09211e-05	0.000108116	REEP1
XLOC_054485	231.99	2.85847	0.194061	14.7298	4.15049e-49	6.41659e-47	Osbp
XLOC_065006	25.9426	2.85771	0.502436	5.6877	1.28764e-08	1.94331e-07
XLOC_066645	7.14656	2.85697	0.630098	4.53417	5.78309e-06	5.99476e-05
XLOC_001954	185.581	2.85643	0.34332	8.32003	8.79443e-17	2.86503e-15	Slc1a2
XLOC_043379	9.02545	2.8553	0.646535	4.4163	1.00402e-05	0.000100085
XLOC_018629	293.509	2.85356	0.222976	12.7976	1.69069e-37	1.68417e-35	C1GALT1
XLOC_064202	87.4138	2.85338	0.29736	9.59573	8.3327e-22	3.76745e-20
XLOC_038244	9.31411	2.85289	0.625658	4.55982	5.11969e-06	5.35469e-05
XLOC_063953	5.45052	2.84952	0.671829	4.24144	2.22088e-05	0.000209201
XLOC_037902	6.55877	2.84935	0.662885	4.2984	1.72034e-05	0.000165374
XLOC_015999	5.5606	2.84728	0.669744	4.25129	2.12539e-05	0.000200953
XLOC_017610	88.7508	2.83962	0.410721	6.91375	4.72013e-12	1.03821e-10	MAN2B2
XLOC_023119	971.629	2.83744	0.244926	11.5849	4.9148e-31	3.63619e-29	IRG1
XLOC_023119	971.629	2.83744	0.244926	11.5849	4.9148e-31	3.63619e-29	Cln5
XLOC_065985	523.811	2.83673	0.260859	10.8746	1.52373e-27	9.65096e-26	Nuak2
XLOC_046336	64.5345	2.83481	0.347288	8.16269	3.27657e-16	1.02412e-14	KCNA4
XLOC_068980	8.87486	2.83424	0.669764	4.2317	2.31928e-05	0.000217805
XLOC_023612	33.4137	2.83238	0.479001	5.91309	3.35745e-09	5.46478e-08
XLOC_019667	68.1874	2.82638	0.385765	7.32668	2.35921e-13	5.88888e-12	RIMS2
XLOC_000495	88.3088	2.82544	0.295064	9.57569	1.01176e-21	4.54587e-20	sh3yl1
XLOC_001782	28.529	2.82427	0.574867	4.91291	8.97323e-07	1.05232e-05	DDB_G0269086
XLOC_019592	44.5539	2.82111	0.662032	4.26129	2.0325e-05	0.000192761	Matn4
XLOC_010384	46.9457	2.82089	0.378944	7.44408	9.76191e-14	2.50036e-12	Ankk1
XLOC_029320	31.1116	2.82077	0.501239	5.6276	1.82736e-08	2.70022e-07
XLOC_062830	15.7814	2.81981	0.589252	4.78541	1.7064e-06	1.92828e-05
XLOC_040134	3.81395	2.81891	0.677463	4.16098	3.1688e-05	0.000290129	unknown
XLOC_058574	4.08279	2.81568	0.67745	4.15629	3.23456e-05	0.00029546	ccdc80
XLOC_062403	6.0617	2.81382	0.67095	4.19379	2.74337e-05	0.000253906
XLOC_005139	171.71	2.81178	0.21754	12.9253	3.23865e-38	3.33396e-36	ITGB5
XLOC_040858	486.857	2.81086	0.189831	14.8072	1.31682e-49	2.08053e-47	SERPINB1
XLOC_034086	4.71766	2.81023	0.674512	4.16631	3.09571e-05	0.000283799
XLOC_046866	6.32507	2.80718	0.65464	4.28812	1.80188e-05	0.000172482	unknown
XLOC_018730	11.7011	2.80667	0.617667	4.54399	5.51997e-06	5.73441e-05	ARHGAP15
XLOC_001918	193.661	2.80635	0.260676	10.7657	5.00044e-27	3.06369e-25	MICAL3
XLOC_001918	193.661	2.80635	0.260676	10.7657	5.00044e-27	3.06369e-25	mical1
XLOC_015657	116.8	2.80513	0.249874	11.2262	3.03368e-29	2.09363e-27	ESM1
XLOC_006880	4.50195	2.80474	0.677167	4.14187	3.44479e-05	0.000312217	ASIC2
XLOC_006880	4.50195	2.80474	0.677167	4.14187	3.44479e-05	0.000312217	ASIC1
XLOC_033637	1025.41	2.80448	0.164575	17.0408	4.09432e-65	1.04497e-62	unknown
XLOC_033637	1025.41	2.80448	0.164575	17.0408	4.09432e-65	1.04497e-62	Agr3
XLOC_044092	3.91824	2.7999	0.676378	4.13955	3.47991e-05	0.000315135	CYSLTR1
XLOC_038288	3.91824	2.7999	0.676378	4.13955	3.47991e-05	0.000315135
XLOC_018529	4.37369	2.79862	0.675509	4.14298	3.42822e-05	0.000310911
XLOC_016909	43.1905	2.79633	0.670629	4.16971	3.04986e-05	0.000280012	SYT9
XLOC_016909	43.1905	2.79633	0.670629	4.16971	3.04986e-05	0.000280012	SYT10
XLOC_043271	48.5436	2.79297	0.404831	6.8991	5.23339e-12	1.14526e-10	SLC6A8
XLOC_043271	48.5436	2.79297	0.404831	6.8991	5.23339e-12	1.14526e-10	SLC6A3
XLOC_027917	17.639	2.79242	0.496954	5.61906	1.91994e-08	2.82831e-07	CPNE8
XLOC_027917	17.639	2.79242	0.496954	5.61906	1.91994e-08	2.82831e-07	Cpne8
XLOC_002824	12.0242	2.79231	0.597209	4.67561	2.93087e-06	3.19801e-05
XLOC_024063	1346.96	2.79204	0.129067	21.6325	8.89285e-104	5.81175e-101	FLNB
XLOC_024063	1346.96	2.79204	0.129067	21.6325	8.89285e-104	5.81175e-101	Flna
XLOC_032671	5.32248	2.79148	0.67301	4.14775	3.35759e-05	0.000305246
XLOC_017977	5.21777	2.79084	0.664085	4.20253	2.63946e-05	0.000245203
XLOC_031866	286.339	2.7896	0.466868	5.97513	2.29911e-09	3.81413e-08	RASSF2
XLOC_027121	20.0945	2.78849	0.492947	5.65678	1.54242e-08	2.30046e-07	Trim2
XLOC_003899	4.7452	2.78838	0.676362	4.12262	3.74593e-05	0.000337314	BCAM
XLOC_035905	70.8889	2.78815	0.313919	8.88176	6.58131e-19	2.50328e-17	SPNS1
XLOC_028038	291.446	2.78803	0.294816	9.45684	3.17387e-21	1.37864e-19	NRCAM
XLOC_045068	3.63016	2.78799	0.677431	4.11553	3.86292e-05	0.000347413	KIF5B
XLOC_017599	59.0539	2.78588	0.418779	6.6524	2.88343e-11	5.87209e-10	Ido2
XLOC_006443	629.553	2.78388	0.40004	6.95901	3.42678e-12	7.63862e-11	NGFR
XLOC_008205	3071.4	2.78385	0.190671	14.6003	2.79595e-48	4.18743e-46	unknown
XLOC_016811	235.492	2.78237	0.258323	10.7709	4.72429e-27	2.89862e-25
XLOC_040014	153.775	2.77936	0.277935	10	1.5236e-23	7.53638e-22	unknown
XLOC_028628	13.3991	2.77893	0.6093	4.56086	5.09452e-06	5.33095e-05	Lrp8
XLOC_002620	123.151	2.77879	0.635988	4.36925	1.24676e-05	0.000122358
XLOC_038114	1624.25	2.77641	0.204833	13.5545	7.45111e-42	8.73339e-40	NFKBIE
XLOC_055637	53.4504	2.77299	0.385177	7.19926	6.05382e-13	1.45552e-11	EVI5L
XLOC_016438	11.2703	2.77031	0.596186	4.64671	3.37266e-06	3.6432e-05
XLOC_022016	5.64267	2.7694	0.666538	4.15491	3.25418e-05	0.000296938
XLOC_024145	194.015	2.76934	0.299206	9.25565	2.12925e-20	8.83086e-19	Twf2
XLOC_024863	19.8323	2.76915	0.483554	5.72666	1.02426e-08	1.56999e-07
XLOC_054466	187.058	2.76701	0.214438	12.9035	4.29986e-38	4.39493e-36	Vwa5a
XLOC_054466	187.058	2.76701	0.214438	12.9035	4.29986e-38	4.39493e-36	RPS15
XLOC_001830	80.3021	2.76627	0.340401	8.12649	4.41884e-16	1.36497e-14
XLOC_036030	19.4084	2.76549	0.591516	4.67526	2.93583e-06	3.20261e-05
XLOC_035151	82.4928	2.76048	0.411479	6.70868	1.96399e-11	4.06296e-10	ANGPTL5
XLOC_019954	7.95061	2.75948	0.647203	4.26371	2.0106e-05	0.000190999
XLOC_013735	10.1766	2.75933	0.641367	4.30226	1.69063e-05	0.000162775
XLOC_029664	225.1	2.7593	0.209219	13.1886	1.02045e-39	1.1087e-37	SIX4
XLOC_056144	7.55403	2.75807	0.628643	4.38734	1.14745e-05	0.000113282	RERG
XLOC_056144	7.55403	2.75807	0.628643	4.38734	1.14745e-05	0.000113282	PTPRO
XLOC_051413	10.9653	2.7569	0.569409	4.84169	1.28737e-06	1.47642e-05
XLOC_055107	15.4319	2.75567	0.604965	4.55509	5.2362e-06	5.46859e-05	speg
XLOC_055107	15.4319	2.75567	0.604965	4.55509	5.2362e-06	5.46859e-05	Obscn
XLOC_006742	186.165	2.75514	0.203237	13.5563	7.27341e-42	8.54834e-40	AHR
XLOC_000172	5.61265	2.75408	0.657784	4.1869	2.82788e-05	0.000260935	Tg
XLOC_046271	3.71221	2.75173	0.677311	4.06272	4.85034e-05	0.000427133	Nlgn4l
XLOC_062253	12.0805	2.75039	0.578811	4.75179	2.01625e-06	2.25654e-05	Gpr20
XLOC_061886	18.0945	2.74736	0.536988	5.11623	3.11699e-07	3.89133e-06
XLOC_023093	184.367	2.74708	0.239849	11.4534	2.26196e-30	1.64528e-28	PIR
XLOC_028849	30.2593	2.74678	0.421448	6.51749	7.14933e-11	1.39157e-09	unknown
XLOC_056592	211.288	2.74627	0.203457	13.498	1.60647e-41	1.84384e-39	unknown
XLOC_056592	211.288	2.74627	0.203457	13.498	1.60647e-41	1.84384e-39	Uncharacterized
XLOC_069548	357.685	2.74443	0.21562	12.7281	4.1283e-37	4.00148e-35	FLNC
XLOC_068476	4344.22	2.74412	0.164255	16.7064	1.17717e-62	2.82082e-60
XLOC_047446	27.132	2.74257	0.56977	4.81348	1.48325e-06	1.68939e-05	EIF2S3
XLOC_057736	4.83373	2.7402	0.676176	4.0525	5.06742e-05	0.000444164
XLOC_043197	6.53691	2.73996	0.647715	4.23019	2.33497e-05	0.000219135	unknown
XLOC_002197	129.509	2.73718	0.301084	9.09109	9.80475e-20	3.9122e-18	TRPM5
XLOC_011015	3.53146	2.73698	0.677302	4.04101	5.32223e-05	0.00046461
XLOC_045735	30.6712	2.73656	0.496809	5.50829	3.62343e-08	5.15977e-07
XLOC_005379	183.452	2.73154	0.24352	11.2169	3.36878e-29	2.31378e-27	unknown
XLOC_005379	183.452	2.73154	0.24352	11.2169	3.36878e-29	2.31378e-27	Dtx3l
XLOC_067319	319.036	2.7313	0.214433	12.7373	3.66712e-37	3.57051e-35	FLNC
XLOC_057217	30.9515	2.73075	0.469627	5.81473	6.07319e-09	9.58839e-08
XLOC_069091	2570.02	2.73036	0.216016	12.6396	1.27723e-36	1.20023e-34
XLOC_030508	5.64806	2.72944	0.668862	4.08072	4.48969e-05	0.000398218
XLOC_035854	4.6866	2.72778	0.6755	4.03816	5.38717e-05	0.000469614
XLOC_021525	219.925	2.72493	0.30875	8.82569	1.08786e-18	4.08022e-17	Uncharacterized
XLOC_017975	5.05407	2.7248	0.67208	4.05428	5.02895e-05	0.00044124
XLOC_027003	16.3544	2.72364	0.588511	4.62801	3.69189e-06	3.96224e-05	ATP7A
XLOC_034791	3.56724	2.72104	0.677202	4.01807	5.86768e-05	0.00050893
XLOC_037468	53.4224	2.71919	0.368001	7.38908	1.47845e-13	3.74236e-12
XLOC_031437	4.28252	2.71822	0.677537	4.01191	6.02284e-05	0.00052113
XLOC_064334	5.47735	2.71656	0.667417	4.07026	4.69606e-05	0.000414562
XLOC_013573	7.59707	2.71597	0.639491	4.24708	2.16576e-05	0.000204545	COL14A1
XLOC_053847	5.19056	2.71451	0.660835	4.10769	3.9964e-05	0.000358148
XLOC_070555	117.021	2.7111	0.310846	8.7217	2.74067e-18	9.95063e-17
XLOC_036104	13.2741	2.70974	0.556696	4.86754	1.12994e-06	1.30769e-05	Rtn4rl1
XLOC_036104	13.2741	2.70974	0.556696	4.86754	1.12994e-06	1.30769e-05	RTN4R
XLOC_032016	8.45071	2.70613	0.640828	4.22286	2.41222e-05	0.000225942
XLOC_005365	99.733	2.70498	0.342184	7.90505	2.67817e-15	7.79469e-14	Taco1
XLOC_005365	99.733	2.70498	0.342184	7.90505	2.67817e-15	7.79469e-14	Acaa1a
XLOC_031035	42.6082	2.70442	0.390886	6.91871	4.55787e-12	1.00406e-10	SLC24A1
XLOC_055081	375.772	2.70396	0.213463	12.6671	8.9973e-37	8.54803e-35	unknown
XLOC_055081	375.772	2.70396	0.213463	12.6671	8.9973e-37	8.54803e-35	TNS3
XLOC_013717	1503.54	2.70188	0.200047	13.5062	1.43662e-41	1.66128e-39	TMEM238
XLOC_036234	479.114	2.70133	0.271855	9.93666	2.88337e-23	1.41167e-21
XLOC_046597	23.6898	2.6987	0.566669	4.76239	1.91309e-06	2.14554e-05
XLOC_023302	8871.59	2.69819	0.150324	17.9491	4.87354e-72	1.5123e-69	unknown
XLOC_034234	13.3931	2.69766	0.591079	4.56395	5.01991e-06	5.2631e-05
XLOC_050477	5.31818	2.69765	0.662462	4.07215	4.65814e-05	0.000411552	GRIA2
XLOC_056831	6.45876	2.69642	0.665774	4.05005	5.12067e-05	0.000448103
XLOC_056832	23.8427	2.69469	0.500148	5.38778	7.13316e-08	9.72423e-07
XLOC_032941	5.77557	2.69345	0.672971	4.00232	6.27242e-05	0.000540016
XLOC_017012	81.2296	2.6923	0.330752	8.13995	3.95425e-16	1.22704e-14
XLOC_045281	36.6391	2.69209	0.535161	5.03043	4.89377e-07	5.94436e-06	MYL6
XLOC_068796	214.808	2.69176	0.214755	12.5341	4.8595e-36	4.47873e-34	FLNC
XLOC_044677	3.73365	2.69055	0.6773	3.97246	7.11339e-05	0.000606367	Fsd1l
XLOC_031053	17.9869	2.68843	0.545766	4.92597	8.39437e-07	9.88464e-06
XLOC_006738	14.092	2.68704	0.650287	4.13208	3.595e-05	0.000324808
XLOC_055662	43.8687	2.68362	0.400593	6.69913	2.09669e-11	4.31883e-10
XLOC_024062	4723.89	2.67756	0.170718	15.6841	1.94257e-55	3.75735e-53	Flna
XLOC_035166	24.6763	2.67568	0.553788	4.8316	1.35438e-06	1.5471e-05	PIK3R5
XLOC_011920	7.03962	2.67525	0.667116	4.01017	6.06762e-05	0.000524584
XLOC_030512	11.8569	2.67321	0.587036	4.55374	5.27014e-06	5.50137e-05
XLOC_062957	5.41384	2.67317	0.674971	3.96042	7.48183e-05	0.000634016
XLOC_044209	114.264	2.67305	0.27872	9.59045	8.77014e-22	3.96107e-20	Yap1
XLOC_051436	11.5381	2.67295	0.579506	4.61247	3.97922e-06	4.24315e-05
XLOC_040365	3.8999	2.6725	0.676807	3.94868	7.85829e-05	0.000662771
XLOC_022072	3.43986	2.67197	0.676987	3.94685	7.91848e-05	0.000667347
XLOC_031109	328.122	2.6707	0.225741	11.8308	2.70471e-32	2.11728e-30	WFDC3
XLOC_054733	3934.17	2.6702	0.523328	5.10235	3.35455e-07	4.16859e-06
XLOC_012459	4.40547	2.67018	0.676039	3.94974	7.82354e-05	0.000660249
XLOC_061215	303.6	2.66814	0.24999	10.673	1.36124e-26	8.17751e-25
XLOC_028363	33.8668	2.66589	0.456952	5.83407	5.40907e-09	8.60286e-08
XLOC_033741	213.351	2.66459	0.315416	8.44785	2.96724e-17	1.00067e-15	Keratin%2C
XLOC_023132	154.516	2.66303	0.21552	12.3563	4.5015e-35	4.01994e-33	Dach2
XLOC_023132	154.516	2.66303	0.21552	12.3563	4.5015e-35	4.01994e-33	Dach1
XLOC_000069	32.1844	2.66178	0.428852	6.20677	5.40863e-10	9.58859e-09	Moxd2
XLOC_045416	4.65485	2.66076	0.676924	3.93066	8.47129e-05	0.000710465
XLOC_056830	13.1848	2.66034	0.546002	4.87239	1.10257e-06	1.27739e-05	incenp-a
XLOC_015686	34.4886	2.66031	0.419111	6.34752	2.18819e-10	4.06299e-09	Homer1
XLOC_024231	7.15881	2.66003	0.62571	4.25122	2.12613e-05	0.000200978
XLOC_065581	31.2968	2.65882	0.491269	5.41215	6.22736e-08	8.56708e-07
XLOC_019387	7.60744	2.65763	0.665982	3.99054	6.59231e-05	0.000565301
XLOC_034794	17.294	2.65723	0.531585	4.9987	5.77177e-07	6.94625e-06
XLOC_033094	6179.1	2.65577	0.155121	17.1207	1.04079e-65	2.67217e-63	Keratin%2C
XLOC_025507	151.648	2.65437	0.260415	10.1928	2.13445e-24	1.11324e-22
XLOC_019528	6.38722	2.65254	0.654351	4.05369	5.04158e-05	0.000442169
XLOC_044125	12.7373	2.65091	0.637429	4.15876	3.19982e-05	0.000292597	Pls1
XLOC_023379	22.1498	2.64973	0.465416	5.69324	1.24653e-08	1.88522e-07	unknown
XLOC_053192	1031.22	2.64926	0.36762	7.20651	5.74037e-13	1.38478e-11	unknown
XLOC_053192	1031.22	2.64926	0.36762	7.20651	5.74037e-13	1.38478e-11	SEMA3D
XLOC_024094	551.856	2.64894	0.193791	13.6691	1.5536e-42	1.85115e-40	Fbln2
XLOC_002823	8.24026	2.64808	0.641207	4.12984	3.63016e-05	0.000327847
XLOC_049206	27.1294	2.64769	0.487258	5.43387	5.51459e-08	7.63599e-07	MATN2
XLOC_016129	6.063	2.64719	0.663958	3.98698	6.69194e-05	0.000572933
XLOC_006968	3414.18	2.64569	0.361314	7.32241	2.43554e-13	6.07239e-12	WNT6
XLOC_006968	3414.18	2.64569	0.361314	7.32241	2.43554e-13	6.07239e-12	Wnt6
XLOC_006924	75.7787	2.64395	0.336144	7.86552	3.6757e-15	1.05696e-13	RAB5C
XLOC_045097	154.45	2.64346	0.226836	11.6536	2.19853e-31	1.66367e-29	fn1
XLOC_050647	224.246	2.64269	0.566103	4.6682	3.03844e-06	3.30369e-05	unknown
XLOC_050647	224.246	2.64269	0.566103	4.6682	3.03844e-06	3.30369e-05	TBK1
XLOC_065377	3.67741	2.63938	0.67754	3.89553	9.79828e-05	0.000813061
XLOC_040199	5.7587	2.63841	0.666986	3.95573	7.63017e-05	0.000645318	GRID1
XLOC_032401	10.2954	2.63753	0.601059	4.38813	1.14328e-05	0.000112922	FAM65A
XLOC_026924	6.50723	2.63738	0.663162	3.97698	6.97969e-05	0.0005957
XLOC_035486	13.6676	2.6373	0.618488	4.26411	2.00705e-05	0.000190725
XLOC_057250	24.4826	2.63636	0.477435	5.52192	3.35307e-08	4.79217e-07	RET
XLOC_010125	66.3038	2.63571	0.303868	8.67389	4.17616e-18	1.49984e-16
XLOC_052745	1124.67	2.63537	0.229131	11.5016	1.29496e-30	9.48313e-29	S100A1
XLOC_002314	582.77	2.63488	0.242609	10.8606	1.77598e-27	1.1183e-25	ST8SIA6
XLOC_002399	3.99122	2.63435	0.67701	3.89115	9.97711e-05	0.000825217
XLOC_045066	3.28919	2.63372	0.676734	3.89181	9.94985e-05	0.000824212	Kif5c
XLOC_069100	3.21869	2.63215	0.676644	3.89	0.000100245	0.000828801
XLOC_011744	148.291	2.6315	0.260717	10.0933	5.91414e-24	3.00819e-22	ism1
XLOC_030335	414.73	2.63078	0.173715	15.1443	8.26603e-52	1.43766e-49	eglC
XLOC_003997	6.13438	2.62915	0.65079	4.03994	5.34659e-05	0.000466454
XLOC_005001	186.869	2.6284	0.343537	7.651	1.99419e-14	5.36926e-13	Scn2a
XLOC_011664	82.3468	2.62736	0.434637	6.04496	1.4945e-09	2.52398e-08	unc45b
XLOC_065719	14.1977	2.62482	0.536671	4.89092	1.00363e-06	1.16968e-05
XLOC_016652	490.569	2.62442	0.198219	13.24	5.15452e-40	5.65724e-38	St5
XLOC_055014	369.425	2.62092	0.198381	13.2116	7.52519e-40	8.21731e-38	VPS41
XLOC_053650	9.28962	2.62078	0.626382	4.184	2.86424e-05	0.000264094
XLOC_017559	6.78681	2.61982	0.671405	3.902	9.54002e-05	0.000792393
XLOC_031615	4.84877	2.61972	0.670502	3.90711	9.34072e-05	0.000777486
XLOC_033494	2649.55	2.61926	0.224169	11.6843	1.53386e-31	1.16479e-29	COL1A1
XLOC_047689	4.49648	2.61916	0.673045	3.8915	9.96252e-05	0.000824786
XLOC_005060	67.8986	2.61837	0.317015	8.25943	1.46376e-16	4.70464e-15	PTGES3
XLOC_005060	67.8986	2.61837	0.317015	8.25943	1.46376e-16	4.70464e-15	Cers6
XLOC_023943	80.3667	2.6182	0.258151	10.1421	3.59299e-24	1.83839e-22	fam3c
XLOC_011845	17.3516	2.61672	0.610539	4.28592	1.81988e-05	0.000174051	PLEK
XLOC_034569	16.0037	2.61647	0.520361	5.02818	4.95166e-07	6.00787e-06	TRIM29
XLOC_041422	293.621	2.61643	0.154069	16.9821	1.11384e-64	2.80954e-62
XLOC_028764	35.8174	2.61457	0.385621	6.78015	1.20054e-11	2.52847e-10	sidkeyp-117h8.2
XLOC_043524	3.89051	2.61406	0.67632	3.86513	0.000111031	0.000909441
XLOC_067073	29.4587	2.61305	0.429213	6.08799	1.14334e-09	1.9531e-08
XLOC_003898	43.1676	2.61208	0.363518	7.18557	6.69256e-13	1.59928e-11	CADM1
XLOC_041680	418.458	2.60928	0.185434	14.0713	5.7041e-45	7.52401e-43	AGXT2
XLOC_034928	43.0651	2.60798	0.486532	5.36034	8.3066e-08	1.12316e-06
XLOC_007481	4.34874	2.60775	0.677321	3.8501	0.000118071	0.000963628
XLOC_029682	94.9391	2.60769	0.3325	7.84268	4.41028e-15	1.25563e-13	PRSS16
XLOC_003893	6.37989	2.60559	0.667924	3.90103	9.57846e-05	0.000795432	ETS1
XLOC_056573	28.044	2.60508	0.487459	5.3442	9.08159e-08	1.22182e-06
XLOC_063759	50.6407	2.60507	0.662077	3.93469	8.33039e-05	0.000699328
XLOC_058610	823.992	2.60463	0.377473	6.90017	5.19413e-12	1.13783e-10	NUAK2
XLOC_016892	83.2211	2.60413	0.293606	8.86946	7.35011e-19	2.78587e-17	pax6
XLOC_040875	9.70199	2.60409	0.601051	4.33255	1.4739e-05	0.000143475
XLOC_009069	4.13185	2.60296	0.677036	3.84464	0.000120728	0.000983265
XLOC_045889	15.9322	2.6027	0.529129	4.91884	8.70586e-07	1.02283e-05	unknown
XLOC_045889	15.9322	2.6027	0.529129	4.91884	8.70586e-07	1.02283e-05	Grik1
XLOC_023867	8.61923	2.60194	0.627615	4.14576	3.3869e-05	0.000307487
XLOC_028242	28.8516	2.60106	0.449824	5.78239	7.36462e-09	1.1501e-07
XLOC_046541	3.56904	2.60005	0.676848	3.84141	0.000122331	0.000994627
XLOC_020506	160.444	2.59846	0.253774	10.2393	1.32203e-24	7.02256e-23	MYOF
XLOC_015781	275.251	2.59803	0.230299	11.2811	1.62662e-29	1.13163e-27	TPM1
XLOC_024856	37.2168	2.5967	0.45359	5.72477	1.03575e-08	1.58647e-07	slc6a9
XLOC_000123	16678.4	2.59415	0.174573	14.86	5.99248e-50	9.57309e-48	Sptbn1
XLOC_014041	56.4621	2.591	0.637702	4.06302	4.84415e-05	0.000426762	crlf3
XLOC_027218	20.1428	2.5896	0.551068	4.69923	2.61146e-06	2.87567e-05	HHIP
XLOC_031651	86.2419	2.58933	0.358035	7.23206	4.7571e-13	1.1586e-11
XLOC_004677	3.69406	2.58772	0.677408	3.82004	0.00013343	0.00107594
XLOC_055320	197.731	2.58738	0.264176	9.79415	1.193e-22	5.68592e-21	UBE2R2
XLOC_055320	197.731	2.58738	0.264176	9.79415	1.193e-22	5.68592e-21	Arnt
XLOC_020644	15.8851	2.58688	0.52864	4.89346	9.90801e-07	1.15566e-05	C1qb
XLOC_005050	577.343	2.58676	0.238616	10.8407	2.20749e-27	1.37994e-25	PARP15
XLOC_005050	577.343	2.58676	0.238616	10.8407	2.20749e-27	1.37994e-25	AVIL
XLOC_058386	15.6607	2.58315	0.549439	4.70144	2.58335e-06	2.8469e-05	CRY1
XLOC_039414	70.1072	2.58283	0.392563	6.57939	4.72376e-11	9.41544e-10
XLOC_008071	15.8873	2.58151	0.522402	4.94161	7.74794e-07	9.16097e-06	PDZD2
XLOC_008071	15.8873	2.58151	0.522402	4.94161	7.74794e-07	9.16097e-06	IL16
XLOC_012680	149.682	2.58114	0.387297	6.6645	2.65574e-11	5.42891e-10	HGF
XLOC_012680	149.682	2.58114	0.387297	6.6645	2.65574e-11	5.42891e-10	Hgf
XLOC_050373	4.71661	2.58094	0.675136	3.82284	0.000131924	0.0010648
XLOC_048568	675.478	2.58079	0.167116	15.4431	8.39495e-54	1.54085e-51	BOK
XLOC_027950	62.2114	2.57951	0.314088	8.2127	2.16272e-16	6.87431e-15	unknown
XLOC_036886	956.294	2.57897	0.156688	16.4593	7.19697e-61	1.60014e-58	wnt4a
XLOC_043295	199.589	2.57728	0.301259	8.55502	1.17849e-17	4.06979e-16	FBLN1
XLOC_043348	79.5659	2.57401	0.332673	7.73736	1.01503e-14	2.81191e-13	SLC6A8
XLOC_003713	1097.03	2.57387	0.444042	5.79645	6.77334e-09	1.06288e-07	unknown
XLOC_028692	4.42159	2.57322	0.670724	3.83648	0.000124808	0.00101305	Upp1
XLOC_044216	99.0041	2.57311	0.374481	6.87115	6.36873e-12	1.3825e-10	CLDN18
XLOC_024675	945.907	2.57242	0.440629	5.83806	5.28122e-09	8.41193e-08	TNFRSF11B
XLOC_031022	76.4912	2.56839	0.32255	7.96275	1.68251e-15	4.97406e-14	Lox
XLOC_042722	9.3049	2.56539	0.621215	4.12964	3.63337e-05	0.000327931
XLOC_008310	214.249	2.56418	0.558375	4.59222	4.38554e-06	4.642e-05	DUOXA1
XLOC_013795	24.2824	2.56379	0.431075	5.94743	2.72381e-09	4.48421e-08	Gipr
XLOC_027255	41.4969	2.56151	0.407854	6.28045	3.3759e-10	6.1156e-09	Fibrinogen
XLOC_035077	164.581	2.56001	0.264557	9.67658	3.79181e-22	1.74363e-20	FAM83G
XLOC_033646	7.86123	2.55943	0.668272	3.82992	0.000128187	0.00103755	calcrl
XLOC_043637	17.4703	2.55938	0.53152	4.81522	1.4704e-06	1.6752e-05	TRAF3IP2
XLOC_012681	419.045	2.55856	0.45994	5.5628	2.65482e-08	3.85297e-07
XLOC_060340	5.66498	2.55797	0.658254	3.88599	0.000101914	0.000841636	Flnc
XLOC_043235	1334.43	2.5575	0.137421	18.6107	2.6318e-77	9.15462e-75
XLOC_066422	281.487	2.5568	0.195908	13.051	6.26862e-39	6.65971e-37
XLOC_035036	103.378	2.55533	0.418026	6.11286	9.78582e-10	1.68634e-08	RASD1
XLOC_000009	31.9875	2.55475	0.400261	6.38272	1.7397e-10	3.26396e-09	EPB41L3
XLOC_000009	31.9875	2.55475	0.400261	6.38272	1.7397e-10	3.26396e-09	Epb41l1
XLOC_007448	10.9303	2.55303	0.637199	4.00664	6.15875e-05	0.000531184
XLOC_011016	3.95343	2.55227	0.675603	3.77777	0.000158238	0.00125951
XLOC_000588	132.923	2.5517	0.236829	10.7744	4.54501e-27	2.79259e-25
XLOC_000090	72.4879	2.55161	0.43361	5.88458	3.99061e-09	6.4467e-08	PLEC
XLOC_034558	18.5571	2.54901	0.484892	5.25687	1.46532e-07	1.90889e-06	DTD1
XLOC_004981	13.4578	2.54687	0.543136	4.68921	2.74266e-06	3.00939e-05	MYO1B
XLOC_000518	1646.53	2.54667	0.133584	19.0642	5.01272e-81	1.9134e-78	TRIB2
XLOC_000518	1646.53	2.54667	0.133584	19.0642	5.01272e-81	1.9134e-78	PXDN
XLOC_000518	1646.53	2.54667	0.133584	19.0642	5.01272e-81	1.9134e-78	PKIA
XLOC_045208	424.616	2.54621	0.185953	13.6927	1.12185e-42	1.34787e-40	CSPG5
XLOC_018617	23.7753	2.54562	0.474686	5.36275	8.19643e-08	1.10966e-06	COL28A1
XLOC_023619	52.5845	2.54561	0.438685	5.80282	6.52088e-09	1.02577e-07
XLOC_021171	10.3658	2.54552	0.635507	4.00549	6.18896e-05	0.000533364
XLOC_016736	6.04747	2.5445	0.649944	3.91495	9.04211e-05	0.000754232
XLOC_036236	63.7179	2.5429	0.46781	5.43577	5.45607e-08	7.56224e-07
XLOC_038105	479.112	2.54215	0.185679	13.6911	1.14727e-42	1.37459e-40	FOS
XLOC_062859	12.9822	2.54049	0.630117	4.03177	5.53578e-05	0.000481886
XLOC_003509	197.087	2.54048	0.30064	8.45022	2.90755e-17	9.82079e-16	Fli1
XLOC_056354	36.8082	2.5399	0.410477	6.18769	6.10537e-10	1.07839e-08	Nnmt
XLOC_005457	116.375	2.53912	0.361186	7.02996	2.06599e-12	4.71244e-11	MATN1
XLOC_023311	6074.74	2.53643	0.370431	6.84724	7.52861e-12	1.62123e-10	IRG1
XLOC_023311	6074.74	2.53643	0.370431	6.84724	7.52861e-12	1.62123e-10	Cln5
XLOC_066521	45.7861	2.53642	0.403316	6.2889	3.19714e-10	5.8113e-09	KIAA1217
XLOC_010644	60.2988	2.53526	0.31214	8.12218	4.57882e-16	1.41171e-14	unknown
XLOC_036887	125.088	2.53414	0.29992	8.44941	2.92788e-17	9.88171e-16
XLOC_030399	33.0429	2.53359	0.677078	3.74195	0.000182598	0.00143409	unknown
XLOC_063230	24.8176	2.53317	0.465827	5.43801	5.38777e-08	7.47477e-07
XLOC_005415	75.8377	2.53267	0.281696	8.99079	2.45451e-19	9.60709e-18
XLOC_016560	65.1538	2.53163	0.288941	8.76174	1.92252e-18	7.05737e-17	Tmtc2
XLOC_019936	27.7926	2.53011	0.524296	4.82572	1.39499e-06	1.5918e-05
XLOC_050087	221.741	2.5301	0.251535	10.0586	8.41448e-24	4.23997e-22	NTN4
XLOC_000638	7.75496	2.52963	0.654157	3.86701	0.000110178	0.000903826	Adprhl1
XLOC_017013	132.183	2.52654	0.282575	8.94115	3.85157e-19	1.49263e-17
XLOC_000202	1257.75	2.52617	0.135164	18.6896	6.01368e-78	2.1437e-75	TMEM164
XLOC_040405	14.7861	2.52536	0.57351	4.40334	1.06597e-05	0.000105747
XLOC_002478	7.00096	2.52494	0.623213	4.05149	5.08931e-05	0.000445834
XLOC_046542	4.90828	2.52368	0.672483	3.75278	0.000174882	0.00137943
XLOC_027801	67.3912	2.52368	0.308712	8.17489	2.96142e-16	9.30333e-15	AVPR2
XLOC_021587	334.883	2.5229	0.195462	12.9073	4.09141e-38	4.1918e-36	CDC42EP4
XLOC_005012	88.5698	2.5202	0.315908	7.97764	1.49159e-15	4.4309e-14	MYLK
XLOC_031247	9.31517	2.51892	0.598179	4.21098	2.5427e-05	0.000237339
XLOC_037092	6.2185	2.51784	0.637622	3.9488	7.85451e-05	0.000662603
XLOC_008156	687.333	2.51781	0.238563	10.5541	4.86368e-26	2.80462e-24	GARP
XLOC_043209	3.80564	2.51722	0.677621	3.71479	0.000203372	0.0015814	Iqsec1
XLOC_018339	5.62499	2.51697	0.657229	3.82967	0.000128313	0.00103838
XLOC_031068	21.67	2.51667	0.486846	5.16934	2.3492e-07	2.98375e-06	SV2C
XLOC_026467	14.3302	2.51566	0.550913	4.56634	4.96307e-06	5.2073e-05	Cdkl1
XLOC_066314	2445.03	2.51333	0.231754	10.8448	2.11084e-27	1.32144e-25	unknown
XLOC_065005	8.58635	2.51304	0.630184	3.98778	6.66938e-05	0.000571455
XLOC_001843	12.5992	2.50877	0.570333	4.39878	1.08862e-05	0.000107814	unknown
XLOC_060067	54.125	2.50743	0.474214	5.28755	1.23964e-07	1.63216e-06	CKMT1
XLOC_001969	56.5103	2.50712	0.323797	7.74287	9.71954e-15	2.69777e-13	unknown
XLOC_007902	395.593	2.50505	0.248815	10.0679	7.6576e-24	3.86763e-22	ANKDD1A
XLOC_001940	11.1547	2.5043	0.61504	4.07176	4.66586e-05	0.000412065	Trhde
XLOC_063954	3.34294	2.50422	0.677248	3.69764	0.000217614	0.00168094
XLOC_060774	8.65438	2.50346	0.65246	3.83695	0.000124571	0.00101151
XLOC_017974	5.06272	2.50341	0.676535	3.70035	0.000215304	0.00166608
XLOC_046740	1308.9	2.50277	0.156253	16.0175	9.6503e-58	1.96343e-55	LanA
XLOC_023354	4.72422	2.50073	0.664368	3.76408	0.000167164	0.00132469	Nbea
XLOC_018341	12.3679	2.50065	0.626329	3.99255	6.53671e-05	0.000560979
XLOC_055019	42.5093	2.50007	0.483576	5.16996	2.3415e-07	2.97571e-06	KRT8
XLOC_051441	13.2397	2.49905	0.614295	4.06815	4.73871e-05	0.000418242
XLOC_036928	68.0762	2.49877	0.300867	8.30523	9.96301e-17	3.23839e-15	unknown
XLOC_028693	7.4054	2.49795	0.670077	3.72785	0.000193117	0.00150983	Upp1
XLOC_016705	959.328	2.49789	0.212326	11.7644	5.95343e-32	4.59372e-30	KIAA1644
XLOC_063600	232.897	2.49779	0.252982	9.87338	5.43052e-23	2.63778e-21
XLOC_009218	52.8364	2.49702	0.484081	5.15827	2.49238e-07	3.15438e-06	Mlxipl
XLOC_023107	1568.25	2.4961	0.176573	14.1364	2.26579e-45	3.0351e-43	IRG1
XLOC_027846	1009.01	2.49554	0.110118	22.6624	1.05337e-113	1.00967e-110	TFE3
XLOC_027846	1009.01	2.49554	0.110118	22.6624	1.05337e-113	1.00967e-110	SSUH2
XLOC_002213	13143.6	2.49542	0.130643	19.1011	2.47297e-81	9.69697e-79	Dispanin
XLOC_019764	42.7583	2.49462	0.360089	6.92778	4.27486e-12	9.45576e-11	Slc17a9
XLOC_019799	41.9426	2.49436	0.408922	6.09984	1.06176e-09	1.82095e-08
XLOC_040050	66.5888	2.49407	0.394404	6.32364	2.55467e-10	4.70699e-09	Cd40
XLOC_000091	1047.2	2.49336	0.21916	11.3769	5.44985e-30	3.89831e-28	PLEC
XLOC_060285	38.2446	2.49238	0.390288	6.38601	1.70273e-10	3.19878e-09	jag1b
XLOC_060285	38.2446	2.49238	0.390288	6.38601	1.70273e-10	3.19878e-09	jag1a
XLOC_060285	38.2446	2.49238	0.390288	6.38601	1.70273e-10	3.19878e-09	Jag1
XLOC_043173	89.0269	2.49146	0.593008	4.2014	2.65275e-05	0.000246384	Cftr
XLOC_000470	82.5279	2.48973	0.323328	7.70031	1.35731e-14	3.70538e-13	RAB23
XLOC_056762	62.6217	2.48971	0.33105	7.52066	5.44999e-14	1.42383e-12
XLOC_019668	22.8857	2.48925	0.445678	5.58532	2.33273e-08	3.40731e-07	RIMS2
XLOC_015398	3.30206	2.48769	0.677514	3.6718	0.000240852	0.00184131
XLOC_006673	43.8389	2.48636	0.37946	6.55238	5.66276e-11	1.11582e-09
XLOC_014254	4.45983	2.48502	0.675069	3.68114	0.000232197	0.00178304
XLOC_061633	806.937	2.48408	0.237859	10.4435	1.56934e-25	8.79097e-24	Tnfrsf23
XLOC_038785	205.599	2.48347	0.264135	9.40226	5.3401e-21	2.28506e-19
XLOC_058207	2.90672	2.48323	0.675133	3.67813	0.000234953	0.00180196
XLOC_005287	21.5602	2.4831	0.588968	4.21602	2.4865e-05	0.000232596	PDE1C
XLOC_036803	108.825	2.48288	0.298312	8.32312	8.56793e-17	2.79547e-15
XLOC_060918	50.0815	2.48087	0.41947	5.9143	3.33297e-09	5.42699e-08
XLOC_019901	6.00185	2.48035	0.674108	3.67945	0.000233735	0.00179326
XLOC_068374	2.88866	2.47967	0.674884	3.67422	0.000238574	0.00182583
XLOC_044768	39.1598	2.47911	0.463446	5.3493	8.8296e-08	1.19015e-06	Fam172a
XLOC_024976	66.6171	2.4784	0.29884	8.29341	1.10047e-16	3.56623e-15
XLOC_037447	22.3483	2.47747	0.454876	5.44648	5.13756e-08	7.14603e-07	Slc18b1
XLOC_025134	15.0396	2.47452	0.57505	4.30314	1.68392e-05	0.000162199
XLOC_044084	396.345	2.47447	0.156883	15.7727	4.79182e-56	9.35229e-54	SCHIP1
XLOC_059798	11.4971	2.47278	0.568152	4.35232	1.34705e-05	0.00013187
XLOC_029591	79.1938	2.472	0.672498	3.67584	0.000237064	0.00181589	Fosl2
XLOC_070218	4.14204	2.47152	0.677611	3.6474	0.000264906	0.00200883
XLOC_038150	31.8106	2.47064	0.506565	4.87724	1.07582e-06	1.24841e-05	C1orf115
XLOC_013794	24.8582	2.47051	0.529933	4.66192	3.13274e-06	3.39253e-05
XLOC_031005	188.197	2.46932	0.26263	9.40229	5.33897e-21	2.28506e-19
XLOC_004472	10.5579	2.46853	0.608713	4.05532	5.00655e-05	0.000439454
XLOC_060450	2.9644	2.46776	0.674832	3.65686	0.000255328	0.00194405
XLOC_006420	49.789	2.46619	0.377908	6.5259	6.75928e-11	1.31982e-09	BAMBI
XLOC_031616	9.34391	2.46591	0.611149	4.03487	5.46315e-05	0.000476044
XLOC_028848	3.99063	2.4649	0.676587	3.64313	0.000269342	0.00203924
XLOC_055816	6.2802	2.46357	0.657196	3.74862	0.000177813	0.00140008
XLOC_044144	3.90693	2.46238	0.67753	3.63434	0.000278692	0.00210188
XLOC_003073	220.144	2.46079	0.614874	4.0021	6.27825e-05	0.000540411
XLOC_031520	29.4611	2.46043	0.461489	5.3315	9.74044e-08	1.30517e-06
XLOC_038734	14.0855	2.45777	0.540235	4.54944	5.37885e-06	5.59725e-05	CAV1
XLOC_044146	4.7605	2.45728	0.668373	3.67652	0.00023644	0.00181144	C1qtnf9
XLOC_026457	424.069	2.45538	0.187588	13.0892	3.79556e-39	4.07248e-37	sraP
XLOC_026457	424.069	2.45538	0.187588	13.0892	3.79556e-39	4.07248e-37	PLEKHG1
XLOC_033596	917.794	2.45516	0.393482	6.23959	4.38728e-10	7.8554e-09	GRB14
XLOC_033596	917.794	2.45516	0.393482	6.23959	4.38728e-10	7.8554e-09	Grb10
XLOC_040154	24.547	2.45499	0.467726	5.24879	1.53104e-07	1.98911e-06	unknown
XLOC_023307	19.5168	2.45348	0.5165	4.75021	2.03203e-06	2.27243e-05
XLOC_016891	379.565	2.45316	0.26679	9.1951	3.74655e-20	1.53466e-18	pax6
XLOC_005098	20.8001	2.45268	0.495719	4.94773	7.50835e-07	8.89963e-06	KCNH2
XLOC_046673	16.3643	2.45256	0.600314	4.08546	4.39897e-05	0.000391115
XLOC_063345	649.382	2.45097	0.196848	12.4511	1.37945e-35	1.25e-33
XLOC_038349	3.07313	2.4508	0.677536	3.61722	0.000297783	0.00222682
XLOC_026468	191.601	2.44972	0.234166	10.4615	1.29808e-25	7.33816e-24	Cdkl1
XLOC_026468	191.601	2.44972	0.234166	10.4615	1.29808e-25	7.33816e-24	cdkl1
XLOC_033324	15.6911	2.44939	0.54515	4.49306	7.02061e-06	7.17583e-05
XLOC_008335	2519.42	2.44931	0.14695	16.6676	2.25434e-62	5.28459e-60	MAP2K2
XLOC_069321	58.3676	2.4478	0.376971	6.49333	8.39573e-11	1.62392e-09
XLOC_044301	34.2697	2.44738	0.388477	6.29995	2.97749e-10	5.44649e-09	MFI2
XLOC_027919	29.6383	2.44685	0.430712	5.68093	1.3396e-08	2.01679e-07	CPNE8
XLOC_054924	53.7513	2.44645	0.30588	7.99806	1.26398e-15	3.78343e-14	ZFHX3
XLOC_006486	69.2363	2.44559	0.415644	5.88386	4.00812e-09	6.47014e-08	unknown
XLOC_006486	69.2363	2.44559	0.415644	5.88386	4.00812e-09	6.47014e-08	Svil
XLOC_003460	4.32751	2.44444	0.673704	3.62836	0.000285229	0.00214378	COL1A1
XLOC_047881	16.4285	2.44327	0.545326	4.48039	7.45067e-06	7.58484e-05
XLOC_033631	105.744	2.44264	0.270379	9.03414	1.65303e-19	6.51739e-18	Bcam
XLOC_013850	34.2737	2.4424	0.468896	5.20884	1.90026e-07	2.43288e-06	Cyp3a2
XLOC_036782	287.145	2.44141	0.234528	10.4099	2.23477e-25	1.24538e-23	Tp63
XLOC_032321	5.99783	2.43998	0.66543	3.66678	0.000245628	0.00187616
XLOC_013637	6.55063	2.4391	0.651027	3.74654	0.000179288	0.00141092	GGA1
XLOC_018701	21.8013	2.43865	0.533625	4.56997	4.87782e-06	5.12035e-05	At1g12200
XLOC_010563	100.765	2.43683	0.311557	7.82147	5.22098e-15	1.4767e-13	Tubulin
XLOC_033574	23661.2	2.43553	0.224408	10.8532	1.92666e-27	1.20964e-25	krt8
XLOC_030175	55.5834	2.43512	0.341783	7.12473	1.04283e-12	2.44857e-11
XLOC_028763	185.036	2.43485	0.20586	11.8277	2.80758e-32	2.19383e-30	sidkeyp-117h8.2
XLOC_042378	4.33857	2.43449	0.673805	3.61305	0.000302621	0.00226065
XLOC_015737	11.8276	2.43369	0.574305	4.23762	2.25901e-05	0.000212607	ITGA2
XLOC_009070	2.85381	2.43361	0.674143	3.60994	0.000306269	0.00228513
XLOC_036002	6.59529	2.43144	0.657303	3.69912	0.00021635	0.00167267
XLOC_028934	4.99589	2.43108	0.663822	3.66225	0.000250008	0.00190725
XLOC_010293	305.536	2.43037	0.162082	14.9947	7.95333e-51	1.3184e-48	unknown
XLOC_037184	10.4107	2.43033	0.578803	4.19889	2.68231e-05	0.000248762
XLOC_006864	313.334	2.42781	0.176084	13.7878	3.01968e-43	3.75354e-41	Dnah8
XLOC_006864	313.334	2.42781	0.176084	13.7878	3.01968e-43	3.75354e-41	DNAH5
XLOC_006864	313.334	2.42781	0.176084	13.7878	3.01968e-43	3.75354e-41	Dnah5
XLOC_010740	12.1868	2.42473	0.595219	4.07367	4.62775e-05	0.000409118
XLOC_033743	34.1107	2.42448	0.405461	5.97957	2.23724e-09	3.71292e-08
XLOC_070359	3.94943	2.42411	0.675141	3.59052	0.00033002	0.00243955
XLOC_020663	4.40472	2.42331	0.672466	3.60362	0.000313818	0.00233498	gnrh2
XLOC_004407	2.76175	2.42126	0.674145	3.5916	0.000328659	0.00243149
XLOC_006805	85.5382	2.42121	0.275012	8.804	1.32023e-18	4.90909e-17	Lss
XLOC_006805	85.5382	2.42121	0.275012	8.804	1.32023e-18	4.90909e-17	CYP51A1
XLOC_004976	22.037	2.42007	0.437093	5.53675	3.08137e-08	4.43325e-07	GSTENG00029219001
XLOC_005107	9121.21	2.42003	0.195337	12.389	2.99847e-35	2.70006e-33	COL2A1
XLOC_024226	10.88	2.41736	0.601708	4.0175	5.88193e-05	0.00050996
XLOC_045880	77.139	2.41734	0.272719	8.86384	7.73019e-19	2.92223e-17	Sytl4
XLOC_011134	13.982	2.41629	0.538357	4.48827	7.18029e-06	7.33035e-05
XLOC_061632	14.4927	2.41589	0.5689	4.24661	2.1703e-05	0.000204839
XLOC_006807	42.3291	2.41547	0.366813	6.58501	4.54845e-11	9.0828e-10	Lss
XLOC_006807	42.3291	2.41547	0.366813	6.58501	4.54845e-11	9.0828e-10	CYP51A1
XLOC_062494	34.7758	2.41543	0.402965	5.99415	2.04556e-09	3.41056e-08	unknown
XLOC_055929	49.6798	2.41531	0.355203	6.79979	1.04769e-11	2.21956e-10
XLOC_045384	46.1044	2.41447	0.346218	6.97383	3.08417e-12	6.88914e-11
XLOC_058412	4.08942	2.41333	0.677617	3.5615	0.000368748	0.00269625
XLOC_022165	3.52418	2.41173	0.677538	3.55954	0.000371504	0.00271548
XLOC_064617	49.7563	2.41168	0.334149	7.21738	5.29987e-13	1.28499e-11
XLOC_042815	26.9585	2.41126	0.462457	5.21402	1.84787e-07	2.37215e-06	unknown
XLOC_042815	26.9585	2.41126	0.462457	5.21402	1.84787e-07	2.37215e-06	naa38
XLOC_042815	26.9585	2.41126	0.462457	5.21402	1.84787e-07	2.37215e-06	cyb5d1
XLOC_059790	46.3361	2.4106	0.347739	6.93223	4.14263e-12	9.1774e-11
XLOC_029663	255.297	2.40814	0.252098	9.55237	1.2676e-21	5.65411e-20	SIX1
XLOC_059678	701.405	2.40726	0.172887	13.9239	4.53306e-44	5.87161e-42	unknown
XLOC_030184	8.06536	2.40684	0.635702	3.78612	0.000153018	0.00122021
XLOC_020623	52.2949	2.40644	0.454987	5.28903	1.22967e-07	1.62051e-06	TLX1
XLOC_055663	2.9806	2.40604	0.67735	3.55213	0.000382123	0.00278838
XLOC_031566	14.2549	2.40253	0.540538	4.44471	8.80115e-06	8.86963e-05
XLOC_013512	19.6792	2.40192	0.556273	4.31787	1.57541e-05	0.000152599
XLOC_024126	504.642	2.39824	0.239297	10.022	1.21977e-23	6.05437e-22	Ip6k3
XLOC_030437	16.3274	2.39775	0.536696	4.46761	7.90982e-06	8.02197e-05	TTPAL
XLOC_070876	113.369	2.3977	0.585528	4.09494	4.22282e-05	0.000376484
XLOC_039191	3.78889	2.3968	0.677044	3.5401	0.000399977	0.00290686
XLOC_023100	350.362	2.39587	0.257739	9.29572	1.46209e-20	6.13464e-19	unknown
XLOC_010836	3.31765	2.39489	0.677695	3.53388	0.000409511	0.00296914
XLOC_002619	57.7523	2.3948	0.647152	3.70052	0.000215156	0.00166523
XLOC_020505	7.26787	2.39412	0.622096	3.84848	0.000118855	0.000969287	MYOF
XLOC_000055	389.699	2.3933	0.213672	11.2008	4.04064e-29	2.76204e-27	unknown
XLOC_001873	28.7892	2.39235	0.516635	4.63064	3.64545e-06	3.9163e-05
XLOC_063533	470.056	2.39187	0.254413	9.40155	5.3765e-21	2.29836e-19	Ip6k3
XLOC_011399	8.13852	2.39145	0.63248	3.78107	0.000156153	0.00124406
XLOC_050343	3.09403	2.39081	0.676412	3.53455	0.00040847	0.00296309
XLOC_050031	18.6323	2.3887	0.529264	4.51326	6.384e-06	6.56716e-05	Nuak1
XLOC_046828	241.253	2.38718	0.200023	11.9345	7.82062e-33	6.28169e-31	COL22A1
XLOC_052747	80.1622	2.38475	0.277865	8.58242	9.28938e-18	3.23912e-16	S100a1
XLOC_043234	473.205	2.3837	0.210197	11.3403	8.28278e-30	5.8376e-28	ITPR1
XLOC_046925	3.5412	2.38347	0.67737	3.51871	0.000433655	0.00313156
XLOC_033532	2.97104	2.38258	0.673076	3.53983	0.000400384	0.00290883
XLOC_058245	2.87234	2.3823	0.673239	3.53856	0.000402316	0.00292189
XLOC_054858	18.8332	2.38183	0.562112	4.23728	2.26242e-05	0.000212881
XLOC_013141	3.0969	2.38159	0.677159	3.51703	0.000436401	0.0031477
XLOC_038112	326.478	2.38102	0.16377	14.5388	6.87434e-48	1.01894e-45	PRADC1
XLOC_038112	326.478	2.38102	0.16377	14.5388	6.87434e-48	1.01894e-45	Kcnk18
XLOC_038112	326.478	2.38102	0.16377	14.5388	6.87434e-48	1.01894e-45	HOGA1
XLOC_023306	73.5107	2.38087	0.432043	5.51072	3.57364e-08	5.09391e-07	unknown
XLOC_023306	73.5107	2.38087	0.432043	5.51072	3.57364e-08	5.09391e-07	glod5
XLOC_002401	3.37694	2.37892	0.671864	3.54078	0.000398949	0.00290086
XLOC_052267	76.2251	2.37682	0.285106	8.33662	7.6445e-17	2.50364e-15
XLOC_003554	231.943	2.37672	0.187339	12.6867	7.00499e-37	6.72932e-35	CAP1
XLOC_045064	4.94931	2.37641	0.66163	3.59175	0.000328468	0.00243099	tig
XLOC_006421	174.004	2.37619	0.253649	9.36804	7.38947e-21	3.1402e-19	BAMBI
XLOC_066282	26.8419	2.37465	0.421181	5.63808	1.71952e-08	2.55136e-07	CPB1
XLOC_054943	53.3159	2.37404	0.310085	7.65609	1.91676e-14	5.17694e-13
XLOC_052047	486.464	2.37275	0.236649	10.0264	1.16636e-23	5.80261e-22
XLOC_069424	41.8175	2.37159	0.385181	6.15707	7.41029e-10	1.29719e-08	unknown
XLOC_067758	2.72119	2.37157	0.673171	3.52299	0.000426712	0.00308453	Itgam
XLOC_035243	1563.13	2.37139	0.211292	11.2233	3.13253e-29	2.15839e-27	Itgb4
XLOC_017790	6.39068	2.37064	0.675895	3.50741	0.000452494	0.00325236	HMX3
XLOC_018716	186.847	2.37052	0.231695	10.2312	1.43734e-24	7.60696e-23	unknown
XLOC_054484	21.0685	2.36983	0.501691	4.72369	2.31609e-06	2.57341e-05	VWA5A
XLOC_034229	42.7274	2.36918	0.379519	6.24258	4.30407e-10	7.71603e-09	RASGRP3
XLOC_034229	42.7274	2.36918	0.379519	6.24258	4.30407e-10	7.71603e-09	rasgrp1
XLOC_035774	3.56518	2.36832	0.677233	3.49705	0.000470428	0.00336668
XLOC_049753	407.254	2.36712	0.18734	12.6354	1.34665e-36	1.26272e-34	MDM2
XLOC_049753	407.254	2.36712	0.18734	12.6354	1.34665e-36	1.26272e-34	CECR1
XLOC_018071	15.1469	2.36707	0.621139	3.81085	0.000138489	0.00111341
XLOC_024912	15.3415	2.3666	0.569947	4.15231	3.29139e-05	0.000300015	SRMS
XLOC_024912	15.3415	2.3666	0.569947	4.15231	3.29139e-05	0.000300015	SRK1
XLOC_029965	3.30433	2.36449	0.677764	3.48866	0.000485452	0.00346328
XLOC_029656	360.347	2.36236	0.214017	11.0382	2.50029e-28	1.65407e-26	PPP1R10
XLOC_058685	43.1408	2.36233	0.359787	6.56591	5.17143e-11	1.02274e-09	unknown
XLOC_035907	35.1037	2.36231	0.46585	5.07098	3.95775e-07	4.87185e-06
XLOC_047155	8.05263	2.3615	0.636336	3.71109	0.000206372	0.00160271	Cacna2d3
XLOC_012730	41.9829	2.36122	0.428227	5.51396	3.50857e-08	5.00944e-07	Cntn2
XLOC_039459	172.863	2.36012	0.260328	9.06596	1.23513e-19	4.90559e-18	ttc39b
XLOC_024176	7.16436	2.35972	0.660313	3.57363	0.000352065	0.00259008
XLOC_026117	13.1216	2.35943	0.581266	4.05913	4.92559e-05	0.000433229
XLOC_034579	135.133	2.35792	0.227729	10.3541	4.00981e-25	2.19765e-23	Mllt4
XLOC_035903	49.6349	2.3578	0.430122	5.4817	4.21265e-08	5.93611e-07	ATP2A2
XLOC_033777	935.273	2.35659	0.162184	14.5304	7.77906e-48	1.14909e-45	ITGA9
XLOC_015794	6.60435	2.35475	0.664545	3.5434	0.000395003	0.00287555	FBP1
XLOC_060453	2.72166	2.35368	0.672764	3.49853	0.000467836	0.00335091
XLOC_064449	14.098	2.3534	0.619959	3.79606	0.000147012	0.00117645
XLOC_023242	10.1898	2.35308	0.639861	3.67748	0.000235551	0.00180623	Lnx2
XLOC_067325	25.7603	2.3511	0.420842	5.58664	2.315e-08	3.38255e-07
XLOC_033144	5.329	2.35103	0.659939	3.5625	0.000367345	0.00268782	TNR
XLOC_019645	660.069	2.35058	0.164185	14.3166	1.72258e-46	2.38907e-44	Aard
XLOC_007483	3.41396	2.35015	0.677111	3.47085	0.000518807	0.00367815
XLOC_026389	1018.67	2.34866	0.182984	12.8353	1.04019e-37	1.04099e-35	REL
XLOC_000185	1044.03	2.34782	0.143851	16.3212	6.97714e-60	1.50472e-57	unknown
XLOC_000185	1044.03	2.34782	0.143851	16.3212	6.97714e-60	1.50472e-57	PPM1L
XLOC_000185	1044.03	2.34782	0.143851	16.3212	6.97714e-60	1.50472e-57	Gpc6
XLOC_015732	39.1936	2.34713	0.383051	6.12745	8.92983e-10	1.55061e-08	IDH3A
XLOC_034230	532.515	2.3465	0.595069	3.94323	8.03907e-05	0.000677244	FOS
XLOC_011544	12.075	2.34585	0.611799	3.83435	0.000125897	0.00102073	Sult1c1
XLOC_011544	12.075	2.34585	0.611799	3.83435	0.000125897	0.00102073	MX2
XLOC_003500	62.1861	2.34582	0.676262	3.4688	0.000522779	0.0037002
XLOC_043232	435.769	2.34212	0.240332	9.74533	1.93147e-22	9.09497e-21	Itpr2
XLOC_043232	435.769	2.34212	0.240332	9.74533	1.93147e-22	9.09497e-21	ITPR1
XLOC_009202	1930	2.3404	0.212841	10.996	3.99309e-28	2.62152e-26	Fructose-bisphosphate
XLOC_043682	38.7209	2.34023	0.433613	5.39706	6.77428e-08	9.27309e-07	PTCHD1
XLOC_070400	140.376	2.33981	0.223373	10.4749	1.12621e-25	6.37493e-24	unknown
XLOC_057494	3.10261	2.33914	0.676673	3.45683	0.000546574	0.00384465
XLOC_036336	7.73735	2.33841	0.653711	3.57713	0.000347384	0.00255826
XLOC_038930	58.2699	2.33754	0.331985	7.04112	1.90697e-12	4.36588e-11	NAMPT
XLOC_061504	162.647	2.33744	0.284437	8.21776	2.07338e-16	6.59521e-15
XLOC_014628	78.0759	2.33711	0.312774	7.4722	7.88671e-14	2.03212e-12
XLOC_000615	69.4981	2.33629	0.344286	6.78591	1.1536e-11	2.43555e-10	unknown
XLOC_021438	1255.91	2.33561	0.164347	14.2115	7.77225e-46	1.05754e-43	arc1
XLOC_046538	3.2275	2.33553	0.677155	3.44904	0.000562584	0.00394184
XLOC_034793	19.8449	2.33434	0.567415	4.11398	3.88891e-05	0.000349459
XLOC_034297	603.264	2.33273	0.132298	17.6324	1.39039e-69	4.0797e-67	CAPN1
XLOC_017758	41.8479	2.33222	0.672835	3.46626	0.00052776	0.00372872	LRRTM3
XLOC_059940	98.4425	2.33217	0.30761	7.58159	3.41333e-14	9.0713e-13	unknown
XLOC_035751	8.39712	2.33139	0.63021	3.69939	0.000216117	0.00167117
XLOC_063750	41.1005	2.3297	0.393418	5.9217	3.18633e-09	5.20393e-08	col21a1
XLOC_008204	7.89806	2.32958	0.63023	3.6964	0.000218676	0.00168853
XLOC_048641	6.85367	2.32924	0.640991	3.63381	0.00027927	0.00210516	MYO16
XLOC_038884	156.845	2.32923	0.238362	9.77182	1.48752e-22	7.04295e-21	unknown
XLOC_051638	20.2887	2.3277	0.594248	3.91705	8.96407e-05	0.000747867
XLOC_010480	23.687	2.32748	0.506722	4.5932	4.36497e-06	4.62476e-05
XLOC_036857	70.2801	2.32417	0.426413	5.45051	5.02252e-08	6.99956e-07	MME
XLOC_006672	23.7352	2.32352	0.43054	5.39676	6.7854e-08	9.28536e-07	Map3k13
XLOC_034792	2.80362	2.32337	0.675855	3.43768	0.00058673	0.00408637
XLOC_050799	86.2091	2.32292	0.289349	8.02809	9.90006e-16	2.98198e-14	Meis1
XLOC_022498	4.58333	2.32201	0.672212	3.45429	0.000551752	0.00387664	ZNF516
XLOC_014396	8.26965	2.32018	0.647628	3.58258	0.000340216	0.00251019
XLOC_005298	149.221	2.31988	0.219128	10.5868	3.42945e-26	1.99088e-24	RBMS1
XLOC_029614	65.2663	2.31981	0.362527	6.399	1.56396e-10	2.94449e-09	Ccdc88a
XLOC_003678	30.2436	2.31976	0.378765	6.12454	9.09454e-10	1.57603e-08	Dhrsx
XLOC_054957	6.64384	2.31945	0.648651	3.5758	0.000349153	0.00256997
XLOC_018264	2.6106	2.31838	0.671739	3.45131	0.000557882	0.00391461
XLOC_046570	6.16818	2.3175	0.672832	3.4444	0.000572332	0.00400364
XLOC_051489	368.882	2.317	0.199641	11.6058	3.8493e-31	2.86756e-29	unknown
XLOC_039399	9.58364	2.31635	0.600028	3.8604	0.000113202	0.000925813
XLOC_013571	30.1121	2.3159	0.562971	4.11371	3.89353e-05	0.000349801	COL14A1
XLOC_026977	3.33918	2.31583	0.677745	3.41697	0.000633225	0.00437146
XLOC_059681	134.359	2.31578	0.248297	9.32665	1.09269e-20	4.59814e-19
XLOC_026458	42.5327	2.31559	0.356361	6.49787	8.14626e-11	1.57849e-09	unknown
XLOC_026458	42.5327	2.31559	0.356361	6.49787	8.14626e-11	1.57849e-09	PLEKHG1
XLOC_051624	2.64545	2.31533	0.671387	3.44857	0.000563562	0.00394755
XLOC_043475	4.763	2.31462	0.663653	3.48769	0.000487211	0.00347526
XLOC_043231	270.25	2.31434	0.184593	12.5375	4.65484e-36	4.29929e-34	Itpr2
XLOC_057646	2.8671	2.31383	0.671352	3.44651	0.000567868	0.00397434
XLOC_000225	2372.72	2.3128	0.161755	14.2982	2.24646e-46	3.09574e-44	unknown
XLOC_000225	2372.72	2.3128	0.161755	14.2982	2.24646e-46	3.09574e-44	COL4A6
XLOC_002845	4.13103	2.31187	0.67614	3.41922	0.000628012	0.00433954
XLOC_033547	156.705	2.31143	0.369538	6.25492	3.97724e-10	7.17184e-09	hox-delta8
XLOC_033547	156.705	2.31143	0.369538	6.25492	3.97724e-10	7.17184e-09	hox-delta4
XLOC_033547	156.705	2.31143	0.369538	6.25492	3.97724e-10	7.17184e-09	hox-delta11
XLOC_046771	185.413	2.31126	0.261963	8.82284	1.11591e-18	4.17818e-17	mycl1a
XLOC_019316	6.03804	2.31089	0.657803	3.51304	0.000443016	0.00319008
XLOC_006935	132.507	2.31049	0.541726	4.26506	1.99847e-05	0.000189994	dlxE
XLOC_043321	175.355	2.30964	0.276396	8.35627	6.47303e-17	2.13294e-15	AP3B1
XLOC_004937	670.267	2.30936	0.161332	14.3143	1.78157e-46	2.46296e-44
XLOC_000587	4080.55	2.30799	0.134702	17.134	8.27106e-66	2.13626e-63	unknown
XLOC_000587	4080.55	2.30799	0.134702	17.134	8.27106e-66	2.13626e-63	Col4a1
XLOC_034018	3.74119	2.30698	0.67771	3.40408	0.00066388	0.00455611
XLOC_024821	108.107	2.30643	0.300702	7.67014	1.71804e-14	4.65479e-13	unknown
XLOC_014416	7.22323	2.30642	0.659318	3.49819	0.000468429	0.0033546
XLOC_019661	68.2292	2.30447	0.383336	6.01162	1.83679e-09	3.07436e-08	COL21A1
XLOC_019661	68.2292	2.30447	0.383336	6.01162	1.83679e-09	3.07436e-08	col21a1
XLOC_043230	368.392	2.30127	0.180339	12.7608	2.7139e-37	2.65439e-35	FAM3D
XLOC_032400	29.0954	2.30009	0.49169	4.67793	2.89781e-06	3.16433e-05	FAM65A
XLOC_013652	4.13281	2.29931	0.677493	3.39384	0.000689193	0.00471482	CACNG3
XLOC_002262	24.1041	2.29916	0.466215	4.93156	8.15774e-07	9.62176e-06	e2f8
XLOC_039338	98.1715	2.29878	0.260249	8.833	1.01908e-18	3.82558e-17
XLOC_017589	167.657	2.29763	0.231214	9.93724	2.86662e-23	1.40507e-21	XPO7
XLOC_043437	8.92335	2.29651	0.606729	3.78506	0.000153669	0.00122495
XLOC_029586	7.95714	2.29473	0.671135	3.41918	0.000628098	0.00433954
XLOC_053262	5.41921	2.29392	0.660323	3.47393	0.000512892	0.00364038	SAMD5
XLOC_026975	4.24561	2.29385	0.67262	3.41032	0.00064887	0.00446517
XLOC_057575	103.709	2.29382	0.254491	9.01336	1.99836e-19	7.85735e-18	TRPS1
XLOC_030173	8.37355	2.29274	0.606198	3.78216	0.000155471	0.00123886
XLOC_062949	64.1572	2.29266	0.340071	6.74171	1.5653e-11	3.2648e-10
XLOC_028005	24.3757	2.29198	0.493839	4.64116	3.46461e-06	3.73317e-05	SEMA3D
XLOC_005405	153.055	2.29141	0.361566	6.33745	2.33602e-10	4.32258e-09	GBX1
XLOC_023342	185.403	2.28991	0.259213	8.83408	1.00924e-18	3.79194e-17	Dchs1
XLOC_068061	61.9612	2.28819	0.294382	7.77286	7.67306e-15	2.14493e-13	Tmprss2
XLOC_002532	5.70401	2.28774	0.665276	3.43878	0.000584337	0.0040744
XLOC_028793	4.46097	2.28648	0.671339	3.40585	0.000659583	0.00453095	clasp1b
XLOC_028793	4.46097	2.28648	0.671339	3.40585	0.000659583	0.00453095	clasp1
XLOC_000161	60.6968	2.28615	0.383544	5.96058	2.51342e-09	4.15688e-08	Arhgap40
XLOC_040352	8.82902	2.28424	0.62635	3.6469	0.000265419	0.00201236
XLOC_008296	16.4322	2.28422	0.528642	4.32092	1.5538e-05	0.000150641
XLOC_055803	3.10122	2.28369	0.677765	3.36945	0.000753194	0.00509768	THBS3
XLOC_028490	3.52937	2.2834	0.677299	3.37133	0.000748064	0.00506933	Keratin%2C
XLOC_037931	36.1302	2.28326	0.477296	4.78374	1.72063e-06	1.94282e-05	unknown
XLOC_002268	51.6379	2.28298	0.404339	5.64619	1.64042e-08	2.44071e-07
XLOC_045691	2.57622	2.28217	0.671005	3.40111	0.000671117	0.00460285
XLOC_012934	72.6165	2.2807	0.348881	6.5372	6.26829e-11	1.2284e-09	DNAH3
XLOC_012934	72.6165	2.2807	0.348881	6.5372	6.26829e-11	1.2284e-09	Dnah3
XLOC_056209	13.8617	2.28067	0.558302	4.085	4.40764e-05	0.000391746	DLC1
XLOC_042706	4.42036	2.28034	0.674396	3.3813	0.000721435	0.00490737	Ngef
XLOC_012320	3.62362	2.28023	0.677491	3.3657	0.00076349	0.00515766
XLOC_044758	165.926	2.2796	0.272186	8.37513	5.5164e-17	1.8303e-15	TCAF2
XLOC_024607	12.1605	2.2793	0.562363	4.05308	5.05484e-05	0.000443151	lppr5
XLOC_024607	12.1605	2.2793	0.562363	4.05308	5.05484e-05	0.000443151	btbd17
XLOC_012690	37.9592	2.27894	0.400146	5.69528	1.23172e-08	1.86348e-07	Dyrk2
XLOC_023108	5503.62	2.27808	0.197071	11.5597	6.59252e-31	4.85247e-29
XLOC_047147	147.631	2.27786	0.222701	10.2284	1.47989e-24	7.82254e-23	Snx4
XLOC_031760	6.23795	2.27781	0.662979	3.43572	0.000590977	0.00411205
XLOC_063224	16.9307	2.27753	0.541319	4.20737	2.58365e-05	0.000240692
XLOC_037435	14.7763	2.27724	0.509316	4.47118	7.77891e-06	7.89848e-05
XLOC_022309	115.972	2.27577	0.242666	9.37818	6.7119e-21	2.86071e-19	RIPK2
XLOC_053224	7.69214	2.27564	0.650201	3.4999	0.000465439	0.00333707
XLOC_008086	30.4297	2.27508	0.520858	4.36795	1.25418e-05	0.000123031	Fgf10
XLOC_011319	3.85962	2.27498	0.675576	3.36747	0.000758615	0.00512954
XLOC_030504	4.65874	2.27427	0.676789	3.36039	0.000778325	0.00524472
XLOC_007724	2.5824	2.27382	0.670885	3.38928	0.000700761	0.00478561
XLOC_040426	4.08696	2.27299	0.670949	3.38773	0.000704739	0.00480593
XLOC_026333	296.366	2.2724	0.210212	10.8101	3.08493e-27	1.91732e-25	Chac1
XLOC_057107	74.5493	2.27127	0.335446	6.77089	1.27988e-11	2.6877e-10	CAPN5
XLOC_055793	4.66878	2.27083	0.675155	3.36342	0.000769819	0.00519309	Npr1
XLOC_063366	44.7601	2.26963	0.358627	6.32868	2.47261e-10	4.56359e-09
XLOC_049187	794.135	2.2691	0.547071	4.14772	3.35797e-05	0.000305246	Tnc
XLOC_049357	242.955	2.26809	0.215459	10.5268	6.50105e-26	3.72885e-24
XLOC_041542	60.9004	2.2677	0.331696	6.83667	8.10556e-12	1.73965e-10	KANK3
XLOC_041421	168.138	2.267	0.233331	9.71578	2.58272e-22	1.20044e-20	RAB3C
XLOC_037508	39.8009	2.26642	0.494315	4.58498	4.5404e-06	4.79298e-05	ADHFE1
XLOC_017709	7.30264	2.26511	0.635189	3.56605	0.000362404	0.00265671	unknown
XLOC_019619	871.772	2.26483	0.18545	12.2126	2.66216e-34	2.29196e-32	Mboat1
XLOC_005000	149.012	2.26374	0.221005	10.2429	1.27311e-24	6.77937e-23	Map3k14
XLOC_012952	180.866	2.26301	0.219942	10.2891	7.89116e-25	4.24401e-23	TSPAN12
XLOC_012952	180.866	2.26301	0.219942	10.2891	7.89116e-25	4.24401e-23	MDM1
XLOC_002194	1623.37	2.26235	0.147354	15.3532	3.37234e-53	6.03565e-51	unknown
XLOC_002194	1623.37	2.26235	0.147354	15.3532	3.37234e-53	6.03565e-51	PKP3
XLOC_049008	2.52472	2.26213	0.670532	3.37364	0.000741824	0.0050302
XLOC_021657	30.5562	2.26141	0.438408	5.15822	2.49305e-07	3.15438e-06	ALOX5
XLOC_021647	188.732	2.26056	0.333211	6.78417	1.16759e-11	2.46147e-10	Fam83g
XLOC_059799	18.9813	2.2605	0.5079	4.45067	8.56029e-06	8.64102e-05
XLOC_045764	79.8853	2.25908	0.283785	7.96054	1.71291e-15	5.06047e-14	SYTL3
XLOC_012682	122.485	2.25904	0.237093	9.5281	1.6019e-21	7.07212e-20	SEMA3F
XLOC_042065	2.47799	2.25898	0.670546	3.36886	0.000754801	0.00510776
XLOC_030519	7.95345	2.25803	0.628774	3.59116	0.000329212	0.00243482
XLOC_033132	362.809	2.2565	0.206563	10.924	8.84787e-28	5.68756e-26	unknown
XLOC_024930	3.22275	2.25596	0.677626	3.32921	0.000870936	0.00579545	Pigv
XLOC_012984	3.10657	2.25415	0.674142	3.34374	0.000826582	0.00553618
XLOC_025405	81.3779	2.25407	0.367753	6.12931	8.82637e-10	1.534e-08
XLOC_062974	6.64569	2.2531	0.627844	3.58862	0.000332427	0.00245692
XLOC_072039	676.987	2.25309	0.180707	12.4682	1.11322e-35	1.01087e-33	Tagln2
XLOC_012747	29.8954	2.25224	0.675911	3.33215	0.000861778	0.00574514	Mib2
XLOC_032001	8.17428	2.25214	0.650583	3.46172	0.000536729	0.00378342
XLOC_006200	8.82759	2.2518	0.592348	3.80148	0.000143833	0.00115294
XLOC_003664	7.63775	2.25152	0.643737	3.49757	0.000469517	0.00336167	Fgf23
XLOC_032482	8100.06	2.25046	0.114018	19.7377	1.02356e-86	4.41492e-84
XLOC_009483	9.95839	2.24877	0.657351	3.42096	0.000624004	0.00431541	PIPOX
XLOC_034496	51.0868	2.24866	0.439579	5.11549	3.12934e-07	3.90448e-06	PARP1
XLOC_046348	6553.91	2.2485	0.154987	14.5076	1.08422e-47	1.59067e-45	unknown
XLOC_050873	34.4831	2.24795	0.363253	6.1884	6.07782e-10	1.07396e-08
XLOC_010905	7.83363	2.24716	0.627514	3.58105	0.000342221	0.00252368
XLOC_011400	99.868	2.24708	0.272132	8.25729	1.49011e-16	4.78578e-15	RAB15
XLOC_013568	148.994	2.24555	0.225419	9.96169	2.24216e-23	1.10401e-21
XLOC_034020	5.36775	2.24533	0.672695	3.33782	0.000844397	0.00564147
XLOC_023318	276.515	2.2453	0.278303	8.06781	7.1569e-16	2.177e-14	KLF12
XLOC_041221	9.91619	2.24492	0.561639	3.9971	6.41243e-05	0.000551151
XLOC_018814	8.41212	2.24449	0.599221	3.74568	0.000179909	0.00141536	SGCE
XLOC_009393	8518.73	2.24368	0.17153	13.0803	4.26529e-39	4.55383e-37	GPD3
XLOC_019903	5.955	2.24355	0.65532	3.42359	0.000618001	0.00427937
XLOC_023313	6.45043	2.24098	0.633686	3.53642	0.000405584	0.00294366
XLOC_041374	128.217	2.24048	0.25639	8.73855	2.36127e-18	8.62392e-17	slc6a9
XLOC_006493	3.34784	2.23968	0.677761	3.30452	0.000951381	0.00626981	rundc3b
XLOC_060770	8.15829	2.23933	0.628513	3.56291	0.00036677	0.00268407	Intestinal
XLOC_059868	151.568	2.23834	0.30717	7.28699	3.16962e-13	7.84366e-12
XLOC_038006	5.14569	2.23823	0.673172	3.3249	0.000884489	0.00587385	ABCC2
XLOC_066098	6.56472	2.23786	0.661331	3.38387	0.000714707	0.00486698
XLOC_071370	18.506	2.2372	0.506334	4.41843	9.94188e-06	9.91957e-05
XLOC_008069	13.9244	2.23707	0.531529	4.20875	2.56792e-05	0.00023933	PDZD2
XLOC_008069	13.9244	2.23707	0.531529	4.20875	2.56792e-05	0.00023933	IL16
XLOC_005893	7.24013	2.23368	0.636621	3.50864	0.000450396	0.00323836
XLOC_006165	180.246	2.23322	0.316662	7.05237	1.7589e-12	4.0419e-11
XLOC_030367	13.3029	2.23279	0.56782	3.93222	8.41658e-05	0.000706152	SCN3B
XLOC_055864	6.50426	2.23177	0.639492	3.48991	0.000483191	0.00344989	DIP2C
XLOC_041627	2.91912	2.23106	0.67337	3.31328	0.000922101	0.00610015
XLOC_013848	3.73389	2.22943	0.676673	3.2947	0.000985281	0.00647344
XLOC_034565	171.385	2.22885	0.257562	8.65366	4.9873e-18	1.7852e-16	Sertad4
XLOC_051717	173.588	2.2288	0.259153	8.60033	7.94876e-18	2.78291e-16	Znf787
XLOC_044147	3.73738	2.22607	0.677721	3.28465	0.00102111	0.00668236	C1qtnf9
XLOC_013872	19.1269	2.22578	0.492348	4.52075	6.16212e-06	6.36015e-05	MMP21
XLOC_018644	65.5581	2.2241	0.344018	6.46507	1.01251e-10	1.94101e-09	TANC2
XLOC_018644	65.5581	2.2241	0.344018	6.46507	1.01251e-10	1.94101e-09	Tanc1
XLOC_045161	7.60837	2.22367	0.663912	3.34935	0.00081002	0.00543876	STRADA
XLOC_011710	3.75515	2.22263	0.675035	3.29262	0.0009926	0.00651756	PCSK2
XLOC_028791	5189.98	2.22191	0.14809	15.0038	6.93291e-51	1.15458e-48	Tubulin
XLOC_005584	18.4648	2.22128	0.555852	3.99617	6.43746e-05	0.000553122
XLOC_059791	77.0749	2.22036	0.290095	7.6539	1.9498e-14	5.26286e-13	zgc113413
XLOC_048158	169.299	2.2198	0.25219	8.80212	1.34256e-18	4.98784e-17	CTXN3
XLOC_013098	19.0727	2.21963	0.480254	4.62177	3.80478e-06	4.07225e-05
XLOC_018789	17.4309	2.21928	0.499286	4.4449	8.79336e-06	8.86384e-05	Znf385b
XLOC_005100	4.56717	2.21871	0.676365	3.28034	0.00103682	0.00677594	CNBD2
XLOC_005100	4.56717	2.21871	0.676365	3.28034	0.00103682	0.00677594	aad-a
XLOC_027043	5.66825	2.21852	0.660669	3.358	0.000785099	0.00528459
XLOC_054691	24.5902	2.21789	0.459972	4.8218	1.42268e-06	1.62211e-05
XLOC_007997	691.215	2.21702	0.257483	8.61033	7.28487e-18	2.55537e-16	DUOX1
XLOC_023243	37.5921	2.21604	0.523519	4.23297	2.30623e-05	0.000216673	unknown
XLOC_023243	37.5921	2.21604	0.523519	4.23297	2.30623e-05	0.000216673	Lnx2
XLOC_021467	6.47676	2.21554	0.642536	3.44812	0.000564512	0.00395342	Pik3r5
XLOC_039337	10.5248	2.21525	0.605504	3.65852	0.000253676	0.00193352	slc16a12
XLOC_049204	17.1524	2.21435	0.493804	4.48427	7.31656e-06	7.46417e-05	Col12a1
XLOC_058026	252.02	2.21333	0.248389	8.91075	5.06887e-19	1.94689e-17	Psd
XLOC_058026	252.02	2.21333	0.248389	8.91075	5.06887e-19	1.94689e-17	LRX5
XLOC_042363	3.51833	2.21303	0.676987	3.26894	0.0010795	0.00702079
XLOC_023362	164.985	2.21295	0.277214	7.98282	1.43026e-15	4.26047e-14	ATP10A
XLOC_023362	164.985	2.21295	0.277214	7.98282	1.43026e-15	4.26047e-14	Atp10a
XLOC_002242	229.907	2.21242	0.184249	12.0078	3.23388e-33	2.65184e-31	dbx1
XLOC_057627	227.781	2.2116	0.208633	10.6005	2.9652e-26	1.73538e-24	PADI4
XLOC_057627	227.781	2.2116	0.208633	10.6005	2.9652e-26	1.73538e-24	PADI2
XLOC_057627	227.781	2.2116	0.208633	10.6005	2.9652e-26	1.73538e-24	CDC42BPB
XLOC_005439	234.414	2.20916	0.233321	9.46831	2.84398e-21	1.23658e-19	CHRNA1
XLOC_053594	578.114	2.20911	0.121616	18.1647	9.83244e-74	3.16495e-71	RASGRP3
XLOC_037093	7.28873	2.20902	0.616305	3.58429	0.000337997	0.00249552
XLOC_029584	100.646	2.20881	0.266707	8.28177	1.2136e-16	3.92694e-15	GALNT14
XLOC_050783	35.7973	2.20824	0.42057	5.2506	1.51604e-07	1.97081e-06	Slc16a12
XLOC_035224	6.57935	2.2064	0.646338	3.41369	0.000640893	0.00441733	unknown
XLOC_014411	2.57145	2.20637	0.668468	3.30064	0.000964658	0.00635149
XLOC_014419	144.435	2.20621	0.214105	10.3043	6.73456e-25	3.64927e-23
XLOC_065152	4.37434	2.20614	0.677622	3.2557	0.00113112	0.00731242
XLOC_009333	709.605	2.20574	0.148947	14.809	1.28211e-49	2.03314e-47	specc1l
XLOC_009333	709.605	2.20574	0.148947	14.809	1.28211e-49	2.03314e-47	SPECC1
XLOC_067285	155.11	2.20438	0.266291	8.27809	1.25165e-16	4.04099e-15
XLOC_024771	7.54629	2.20344	0.646399	3.4088	0.000652504	0.00448803	SASH1
XLOC_049976	6.33585	2.2034	0.637946	3.45389	0.000552554	0.00388165
XLOC_033136	9.98548	2.20264	0.592409	3.7181	0.000200724	0.00156391	Rabgap1
XLOC_005086	340.653	2.20225	0.161444	13.6409	2.28617e-42	2.70905e-40	myrip
XLOC_005385	283.039	2.20201	0.176165	12.4997	7.49255e-36	6.84695e-34	VWDE
XLOC_005385	283.039	2.20201	0.176165	12.4997	7.49255e-36	6.84695e-34	Vwde
XLOC_065316	65.9233	2.20149	0.360242	6.11115	9.8917e-10	1.70187e-08	RAB27A
XLOC_002140	189.296	2.20144	0.186321	11.8153	3.25391e-32	2.53799e-30	LCHN
XLOC_070361	17.9223	2.20094	0.617194	3.56604	0.000362415	0.00265671
XLOC_017067	2.63916	2.20041	0.674697	3.26133	0.00110891	0.00719041
XLOC_065861	847.423	2.2	0.181387	12.1287	7.43871e-34	6.24229e-32	Bdh1
XLOC_015610	6.27418	2.19801	0.630463	3.48634	0.000489675	0.00349168	DNASE1
XLOC_039574	12.2106	2.1972	0.592208	3.71018	0.000207108	0.00160814	Elavl2
XLOC_029523	4.81299	2.1959	0.677128	3.24295	0.00118298	0.0075987	Tmem63a
XLOC_057818	91.1596	2.19547	0.278119	7.894	2.92654e-15	8.47184e-14	ARHGEF4
XLOC_031513	6.56186	2.19387	0.651079	3.36959	0.000752803	0.00509584
XLOC_046233	22.4905	2.19336	0.466158	4.7052	2.53619e-06	2.79994e-05	Ag2
XLOC_055724	45.3909	2.19327	0.400342	5.4785	4.28952e-08	6.03063e-07	NEXN
XLOC_055724	45.3909	2.19327	0.400342	5.4785	4.28952e-08	6.03063e-07	Nexn
XLOC_063651	72.1877	2.193	0.310095	7.07202	1.52689e-12	3.52944e-11	Padi2
XLOC_004784	2.43219	2.19262	0.668495	3.27993	0.00103833	0.00678375
XLOC_003873	890.664	2.19213	0.153791	14.254	4.23426e-46	5.79798e-44	ADAP1
XLOC_024864	799.608	2.19159	0.168085	13.0386	7.38335e-39	7.82472e-37	B4GALT2
XLOC_055984	16.0275	2.19147	0.523447	4.18661	2.83146e-05	0.000261183	unknown
XLOC_028002	48.7695	2.19058	0.36571	5.98992	2.09944e-09	3.49769e-08	Prickle3
XLOC_028002	48.7695	2.19058	0.36571	5.98992	2.09944e-09	3.49769e-08	LMCD1
XLOC_031074	70.7394	2.19	0.335964	6.51857	7.09793e-11	1.38219e-09	Sema4f
XLOC_031074	70.7394	2.19	0.335964	6.51857	7.09793e-11	1.38219e-09	Sema4c
XLOC_012635	6.12024	2.18985	0.664091	3.29751	0.000975458	0.00641574	GLT8D1
XLOC_036098	3.48973	2.18942	0.676507	3.23636	0.00121065	0.00776146	Wscd2
XLOC_040250	96.0539	2.18925	0.329041	6.65343	2.86345e-11	5.83968e-10	TSPAN15
XLOC_040250	96.0539	2.18925	0.329041	6.65343	2.86345e-11	5.83968e-10	PPM1K
XLOC_039595	215.056	2.18841	0.225821	9.6909	3.29604e-22	1.52214e-20	LPPR1
XLOC_058689	62.9665	2.18704	0.307837	7.10453	1.20734e-12	2.81189e-11	unknown
XLOC_058689	62.9665	2.18704	0.307837	7.10453	1.20734e-12	2.81189e-11	IRF6
XLOC_008272	8.21695	2.18547	0.622808	3.50905	0.000449706	0.00323394	unknown
XLOC_005426	3.38808	2.18467	0.677431	3.22493	0.00126005	0.00804464	Intermediate
XLOC_016727	10.2419	2.18462	0.61665	3.54273	0.000396012	0.00288241	Agbl2
XLOC_012756	48.0982	2.18462	0.354569	6.16134	7.21332e-10	1.26477e-08	TSPAN12
XLOC_012756	48.0982	2.18462	0.354569	6.16134	7.21332e-10	1.26477e-08	MDM1
XLOC_019613	176.822	2.18446	0.193392	11.2955	1.38083e-29	9.63744e-28	Sgk3
XLOC_033683	562.748	2.18444	0.249278	8.76307	1.90012e-18	6.98108e-17	Gad1
XLOC_024240	7.32488	2.18412	0.640136	3.41196	0.000644985	0.00444199
XLOC_028618	18.9515	2.18195	0.482225	4.52475	6.04673e-06	6.25152e-05
XLOC_058572	359.097	2.18111	0.199125	10.9535	6.39568e-28	4.16714e-26	ZDHHC17
XLOC_010741	14.8381	2.17888	0.57388	3.79675	0.000146605	0.00117341
XLOC_048392	7.55854	2.17716	0.611218	3.56201	0.000368026	0.00269143
XLOC_042155	48.3472	2.17698	0.331081	6.57537	4.85333e-11	9.65585e-10	unknown
XLOC_008115	2.60583	2.17664	0.666926	3.26369	0.00109971	0.00713937	NTRK2
XLOC_001783	864.425	2.1759	0.134338	16.1972	5.27827e-59	1.11602e-56	unknown
XLOC_021533	4.73288	2.17563	0.670576	3.24442	0.00117692	0.00756432	MYH7
XLOC_021533	4.73288	2.17563	0.670576	3.24442	0.00117692	0.00756432	MYH3
XLOC_030278	2945.2	2.17408	0.146775	14.8124	1.21899e-49	1.94017e-47	unknown
XLOC_066304	43.6546	2.17341	0.346183	6.2782	3.42515e-10	6.20223e-09
XLOC_010409	4.4187	2.17278	0.6761	3.21369	0.00131041	0.00832548	FA2H
XLOC_018863	34.7041	2.17268	0.42271	5.13988	2.74919e-07	3.4602e-06	KCNJ3
XLOC_024770	13.4811	2.17226	0.575954	3.77159	0.000162209	0.00128921	SASH1
XLOC_018340	6.35864	2.17221	0.650814	3.33769	0.000844784	0.00564319
XLOC_037610	112.728	2.17182	0.371255	5.84994	4.91737e-09	7.86725e-08
XLOC_030809	5.35761	2.17149	0.647347	3.35445	0.000795229	0.0053436
XLOC_023920	91.1148	2.16953	0.349369	6.20985	5.30362e-10	9.42955e-09
XLOC_003015	4.14789	2.16831	0.671399	3.22953	0.00123993	0.00792088
XLOC_010388	10.3719	2.16746	0.603197	3.59329	0.000326528	0.00241912	DPEP1
XLOC_036099	4.53739	2.16689	0.674618	3.21202	0.00131807	0.00836926
XLOC_060286	156.453	2.16394	0.25094	8.62332	6.50382e-18	2.30131e-16	Jag1
XLOC_013621	71.2855	2.16358	0.36749	5.88744	3.92233e-09	6.34115e-08
XLOC_000107	63.4465	2.1629	0.344659	6.27548	3.48551e-10	6.30623e-09	KIF3B
XLOC_045878	186.205	2.16216	0.313623	6.89414	5.41907e-12	1.18405e-10	unknown
XLOC_000682	1636.62	2.16185	0.161242	13.4075	5.46342e-41	6.16895e-39	AIM1
XLOC_024273	3.57226	2.1614	0.67553	3.19956	0.00137639	0.00870111
XLOC_004406	4.53156	2.15937	0.672688	3.21006	0.0013271	0.00841912
XLOC_049353	79.3104	2.15893	0.411982	5.24035	1.60276e-07	2.07416e-06	Trove2
XLOC_005779	5.16236	2.15817	0.667172	3.2348	0.00121729	0.0077961
XLOC_061932	259.843	2.15798	0.296594	7.27588	3.44173e-13	8.49754e-12	unknown
XLOC_006431	121.168	2.15758	0.42347	5.095	3.48739e-07	4.32744e-06	TFPI2
XLOC_046807	311.597	2.15716	0.172627	12.4961	7.83877e-36	7.1482e-34	BAI3
XLOC_030096	15.0243	2.15659	0.563555	3.82676	0.000129841	0.00104995
XLOC_011551	194.589	2.15628	0.24239	8.89591	5.79415e-19	2.21559e-17
XLOC_018616	6.63094	2.15475	0.647405	3.32829	0.000873817	0.00581103	COL28A1
XLOC_007000	3.18945	2.15474	0.677841	3.17883	0.00147869	0.0092704	FMNL2
XLOC_061347	31.0453	2.1546	0.4231	5.09242	3.53519e-07	4.38045e-06	TMTC2
XLOC_061347	31.0453	2.1546	0.4231	5.09242	3.53519e-07	4.38045e-06	Tmtc2
XLOC_050071	2.28105	2.15414	0.667302	3.22813	0.00124602	0.00795861	Parapinopsin
XLOC_031718	48.9777	2.15375	0.372301	5.78496	7.25288e-09	1.13347e-07	FAXC
XLOC_052801	50.1027	2.1533	0.468545	4.59572	4.31267e-06	4.57497e-05	isl2b
XLOC_054875	6.71996	2.15201	0.633483	3.39711	0.000681026	0.00466413
XLOC_030366	29.3181	2.15191	0.422776	5.08997	3.58129e-07	4.42993e-06
XLOC_022191	4.95635	2.1498	0.660608	3.25428	0.00113681	0.00733729
XLOC_043289	5.88499	2.14837	0.660389	3.25319	0.00114116	0.00736192	CNTN2
XLOC_049713	47.6908	2.14587	0.405475	5.29224	1.20826e-07	1.59571e-06	Kcp
XLOC_015959	6.22224	2.14541	0.654239	3.27924	0.00104087	0.00679728	unknown
XLOC_017645	410.048	2.14394	0.174447	12.2899	1.02648e-34	8.98076e-33	QDPR
XLOC_017645	410.048	2.14394	0.174447	12.2899	1.02648e-34	8.98076e-33	pif1
XLOC_061925	223.863	2.14331	0.302815	7.07794	1.46308e-12	3.38738e-11
XLOC_053021	12.212	2.14311	0.568529	3.76956	0.000163532	0.00129925
XLOC_046024	6.66089	2.14294	0.654311	3.27511	0.0010562	0.00688276
XLOC_064931	68.8813	2.14242	0.297848	7.19298	6.33906e-13	1.51986e-11	HPCAL1
XLOC_003481	467.388	2.1422	0.165653	12.9319	2.97513e-38	3.07737e-36	Saimiri
XLOC_018864	176.018	2.14191	0.24284	8.82025	1.142e-18	4.26844e-17	Fkbp11
XLOC_019841	3005.65	2.14138	0.126773	16.8914	5.20272e-64	1.29716e-61	PLEC
XLOC_019841	3005.65	2.14138	0.126773	16.8914	5.20272e-64	1.29716e-61	DST
XLOC_025617	98.49	2.14107	0.354529	6.03918	1.54895e-09	2.60879e-08	NSMF
XLOC_046984	3.01618	2.14039	0.677852	3.1576	0.00159074	0.00987383
XLOC_007479	2.50845	2.1394	0.672508	3.18122	0.00146655	0.00920098
XLOC_003907	44.1743	2.13844	0.38448	5.56191	2.66843e-08	3.87142e-07	CLVS2
XLOC_046722	160.111	2.13843	0.23333	9.16483	4.96239e-20	2.01547e-18	NIPAL2
XLOC_037897	383.589	2.13808	0.177739	12.0293	2.49135e-33	2.05075e-31	MEIS2
XLOC_037897	383.589	2.13808	0.177739	12.0293	2.49135e-33	2.05075e-31	Meis2
XLOC_039942	2.57277	2.13556	0.672619	3.17499	0.00149842	0.00938317
XLOC_018535	502.504	2.13529	0.210456	10.146	3.45163e-24	1.77026e-22	CDK5R1
XLOC_012365	6.55183	2.13527	0.643077	3.3204	0.000898878	0.00596115
XLOC_009283	88.914	2.13475	0.272097	7.84554	4.31091e-15	1.22896e-13	MYO18A
XLOC_049875	5.96444	2.13456	0.675105	3.16182	0.00156789	0.00975446
XLOC_056722	9.89239	2.13403	0.593199	3.59748	0.000321309	0.00238538	notch1
XLOC_040022	26.698	2.13377	0.503641	4.23669	2.26835e-05	0.000213347
XLOC_057547	4.26377	2.1333	0.67093	3.17962	0.00147468	0.00925062
XLOC_003894	2.49419	2.13288	0.673339	3.16762	0.00153691	0.00957834	ETS1
XLOC_055092	15.2792	2.13228	0.625952	3.40646	0.00065812	0.00452233	Parp14
XLOC_016402	4.68662	2.13142	0.675406	3.15577	0.00160076	0.0099332
XLOC_016765	6.04536	2.12955	0.63513	3.35294	0.000799576	0.00537198	unknown
XLOC_059837	13.7305	2.12947	0.623991	3.41267	0.000643299	0.00443179
XLOC_017685	25.0306	2.12875	0.671909	3.16821	0.00153382	0.00956107	SFRP5
XLOC_038569	2.78306	2.12857	0.677157	3.1434	0.00167	0.010308
XLOC_062551	3.21071	2.12767	0.674405	3.15489	0.0016056	0.00995605
XLOC_046804	2.38022	2.12705	0.665988	3.19383	0.001404	0.00884585	MYT1L
XLOC_060297	9.71639	2.12648	0.582915	3.64802	0.000264268	0.00200505	LCP1
XLOC_025310	6.83925	2.12625	0.63684	3.33876	0.000841544	0.00562503
XLOC_048340	22.6726	2.1255	0.451525	4.70739	2.50903e-06	2.77208e-05
XLOC_057307	10.9427	2.12518	0.556861	3.81635	0.000135441	0.00109115
XLOC_062130	9.11855	2.12467	0.60531	3.51006	0.00044801	0.00322282
XLOC_070237	3.09809	2.12438	0.677838	3.13405	0.00172413	0.0105996
XLOC_053654	10.8064	2.12424	0.627492	3.38529	0.000711044	0.00484368
XLOC_031069	6.3612	2.12309	0.629249	3.37401	0.000740822	0.00502419	SV2C
XLOC_023113	3287	2.12274	0.195419	10.8625	1.73919e-27	1.09673e-25	unknown
XLOC_005362	99.4759	2.12242	0.249753	8.49806	1.92778e-17	6.59927e-16	Pecr
XLOC_051414	16.8179	2.12207	0.491523	4.31734	1.57921e-05	0.000152933
XLOC_049222	19.5827	2.12176	0.508152	4.17546	2.97389e-05	0.000273444	EBNA1
XLOC_057524	13.8148	2.12089	0.623873	3.39956	0.000674954	0.00462622
XLOC_051586	2.57183	2.11911	0.671977	3.15355	0.00161296	0.00999307
XLOC_009284	2.26916	2.11885	0.665563	3.18354	0.00145485	0.00913823	Muc19
XLOC_024232	8.43738	2.11833	0.601931	3.51923	0.000432802	0.00312593
XLOC_041220	33.1147	2.11667	0.491425	4.3072	1.65331e-05	0.0001595
XLOC_020160	3.67598	2.1156	0.675569	3.13159	0.00173862	0.0106772
XLOC_044630	18.0763	2.11558	0.500468	4.22721	2.36608e-05	0.000221764	ZNF131
XLOC_001814	601.398	2.11531	0.480674	4.40071	1.07898e-05	0.000106988	OLFM4
XLOC_001352	22.0646	2.11518	0.460838	4.58986	4.43534e-06	4.69126e-05
XLOC_015885	938.304	2.11321	0.17079	12.3732	3.65196e-35	3.27484e-33	Tjp1
XLOC_015885	938.304	2.11321	0.17079	12.3732	3.65196e-35	3.27484e-33	FAM189A1
XLOC_015885	938.304	2.11321	0.17079	12.3732	3.65196e-35	3.27484e-33	Fam189a1
XLOC_023112	1224.72	2.11315	0.423353	4.99145	5.99275e-07	7.19814e-06	unknown
XLOC_023112	1224.72	2.11315	0.423353	4.99145	5.99275e-07	7.19814e-06	glod5
XLOC_016605	15.5249	2.11093	0.58261	3.62322	0.000290953	0.00218255	RAB30
XLOC_039811	3.14936	2.11034	0.677733	3.11382	0.00184684	0.0112466
XLOC_001923	118.742	2.10955	0.261515	8.06665	7.22537e-16	2.19473e-14	MGAT4C
XLOC_072139	72.1063	2.10945	0.678024	3.11117	0.00186345	0.0113414
XLOC_006901	5.01449	2.1089	0.666989	3.16182	0.00156785	0.00975446
XLOC_020246	4.66024	2.10877	0.67504	3.12392	0.00178461	0.0109185
XLOC_020716	15.0826	2.1068	0.513085	4.10615	4.0231e-05	0.000360316	Hs3st1
XLOC_001882	32.0116	2.10619	0.516022	4.08159	4.47295e-05	0.000396979	RAB13
XLOC_029450	5.02724	2.10515	0.677627	3.10665	0.00189218	0.0114967	LTBP2
XLOC_029450	5.02724	2.10515	0.677627	3.10665	0.00189218	0.0114967	Ltbp1
XLOC_032399	938.175	2.10342	0.146796	14.3289	1.44481e-46	2.02334e-44	LRRC16A
XLOC_071702	5.61846	2.10233	0.663706	3.16756	0.00153722	0.00957884
XLOC_019970	11.6382	2.1023	0.577782	3.63857	0.000274159	0.00207062
XLOC_070531	5.37607	2.10222	0.656834	3.20053	0.00137174	0.00867558
XLOC_003196	18.7232	2.10106	0.488117	4.30442	1.67422e-05	0.000161372	WISP3
XLOC_061889	6.87444	2.10014	0.648214	3.23989	0.00119576	0.00767171	unknown
XLOC_003365	3.32472	2.09957	0.677916	3.0971	0.00195425	0.0118356	Barx1
XLOC_017857	152.789	2.09888	0.325808	6.44208	1.17845e-10	2.24415e-09	GFRA2
XLOC_017857	152.789	2.09888	0.325808	6.44208	1.17845e-10	2.24415e-09	GFRA1
XLOC_017915	5.91812	2.09882	0.669099	3.13678	0.00170812	0.0105177
XLOC_035037	16.4833	2.09848	0.537181	3.90646	9.36578e-05	0.000779271	RASD1
XLOC_032004	5.83692	2.09746	0.665373	3.15231	0.00161984	0.0100328
XLOC_048664	18.2274	2.09709	0.502775	4.17103	3.03223e-05	0.000278452
XLOC_066538	2.56469	2.09693	0.672709	3.11714	0.00182617	0.0111396	MYBPC3
XLOC_001689	189.42	2.0968	0.363794	5.7637	8.22878e-09	1.27903e-07	CD109
XLOC_020466	37.4715	2.09667	0.376075	5.57514	2.47326e-08	3.60646e-07	ABLIM1
XLOC_000412	91.0338	2.09371	0.250389	8.36182	6.17597e-17	2.03973e-15	HPCAL1
XLOC_056824	490.736	2.09319	0.220356	9.49912	2.11668e-21	9.25949e-20	unknown
XLOC_056824	490.736	2.09319	0.220356	9.49912	2.11668e-21	9.25949e-20	STY-11
XLOC_047330	8.11736	2.09269	0.619485	3.37811	0.000729846	0.00495677
XLOC_061211	148.286	2.09185	0.36689	5.70157	1.18712e-08	1.80232e-07	P65-B
XLOC_061211	148.286	2.09185	0.36689	5.70157	1.18712e-08	1.80232e-07	P65-A
XLOC_062970	4.34425	2.09116	0.670539	3.11862	0.00181698	0.0110914
XLOC_043221	4.68809	2.08988	0.664429	3.14538	0.00165872	0.0102427	unknown
XLOC_043221	4.68809	2.08988	0.664429	3.14538	0.00165872	0.0102427	Slc2a13
XLOC_053849	7.1405	2.08976	0.641163	3.25933	0.00111677	0.00723596
XLOC_043426	3.60639	2.08957	0.677483	3.0843	0.00204029	0.0122996
XLOC_065734	2376.64	2.08848	0.360775	5.78888	7.08555e-09	1.10933e-07	unknown
XLOC_072157	7.96458	2.08818	0.677487	3.08224	0.00205449	0.012368
XLOC_038008	16.8388	2.08804	0.557502	3.74535	0.000180139	0.00141684	ABCC3
XLOC_024609	20.3516	2.08779	0.509334	4.09906	4.1484e-05	0.000370461	btbd17
XLOC_060917	46.8645	2.08745	0.317434	6.576	4.83266e-11	9.61915e-10
XLOC_001178	11.875	2.08675	0.630534	3.30949	0.000934666	0.0061757
XLOC_060237	15.098	2.08636	0.57643	3.61945	0.000295225	0.00221191
XLOC_045289	787.191	2.08476	0.125066	16.6693	2.19041e-62	5.16278e-60	KCNJ3
XLOC_044699	140.555	2.08391	0.324922	6.41356	1.42159e-10	2.68936e-09	CYP1A1
XLOC_049225	212.003	2.0824	0.208032	10.01	1.37694e-23	6.82664e-22	DST
XLOC_002134	1403.57	2.08218	0.564822	3.68644	0.000227416	0.00174944	OLFM4
XLOC_053349	6.09797	2.08189	0.651692	3.19459	0.00140031	0.00882779
XLOC_052180	10.5031	2.08158	0.560207	3.71573	0.000202617	0.00157639
XLOC_017565	20.1454	2.08021	0.462351	4.49921	6.82064e-06	6.98633e-05	RNF122
XLOC_071772	6.8053	2.08015	0.632951	3.28644	0.00101463	0.00664201	EDNRA
XLOC_019659	6.77916	2.08007	0.644053	3.22966	0.00123938	0.00792088	col21a1
XLOC_016500	4.09912	2.07993	0.672988	3.09059	0.00199762	0.0120761
XLOC_036090	1099.99	2.07903	0.172724	12.0368	2.27733e-33	1.87817e-31	AACS
XLOC_032670	3.06909	2.07875	0.677606	3.06778	0.00215654	0.0129227
XLOC_045820	49.1141	2.07792	0.346942	5.98924	2.10829e-09	3.51107e-08	Cathepsin
XLOC_016561	2.88547	2.07636	0.677359	3.06538	0.00217396	0.0130145	tmtc2
XLOC_024978	4.60214	2.07564	0.661132	3.13952	0.00169224	0.0104274
XLOC_002161	75.0564	2.07519	0.307357	6.75172	1.46103e-11	3.0547e-10
XLOC_028132	2.23525	2.07338	0.664126	3.12197	0.00179643	0.0109815
XLOC_025486	3490.37	2.07245	0.203024	10.2079	1.82763e-24	9.60183e-23	unknown
XLOC_025486	3490.37	2.07245	0.203024	10.2079	1.82763e-24	9.60183e-23	SCIN
XLOC_025486	3490.37	2.07245	0.203024	10.2079	1.82763e-24	9.60183e-23	GSN
[truncated: 4,253 more rows]

## Sheet: DESeq2_T21vT20_downregulated
XLOC	baseMean	log2FoldChange	lfcSE	stat	pvalue	padj	geneID
Supplementary data 1: Results of DESeq2 analyses comparing T18, T20 and T21 DNT RNA-seq datasets.
XLOC	baseMean	log2FoldChange	lfcSE	stat	pvalue	padj	geneID
XLOC_065063	604.36	-6.45274	0.290584	-22.2061	2.99597e-109	8.43097e-105
XLOC_026170	16.934	-5.2939	0.648052	-8.16894	3.11099e-16	6.0796e-14
XLOC_063325	15.7281	-4.74318	0.656359	-7.2265	4.95613e-13	6.06393e-11
XLOC_009424	2030.81	-4.2272	0.272794	-15.4959	3.69568e-54	1.48572e-50	HNF1B
XLOC_009424	2030.81	-4.2272	0.272794	-15.4959	3.69568e-54	1.48572e-50	HNF1A
XLOC_059043	78.8277	-4.14198	0.480285	-8.62402	6.46444e-18	1.59575e-15
XLOC_026548	8.49321	-4.01485	0.675514	-5.9434	2.79171e-09	1.87051e-07
XLOC_063591	12.3664	-3.83834	0.655085	-5.8593	4.64822e-09	2.99326e-07
XLOC_018835	435.71	-3.56877	0.278371	-12.8202	1.26388e-37	1.69366e-34	meox2
XLOC_011752	111.263	-3.45561	0.523062	-6.6065	3.9352e-11	3.63083e-09	SIX3
XLOC_006403	4967.4	-3.4203	0.388686	-8.79965	1.37243e-18	3.82392e-16	skap-epsilon
XLOC_006403	4967.4	-3.4203	0.388686	-8.79965	1.37243e-18	3.82392e-16	hox-epsilon1
XLOC_005714	7.50862	-3.37777	0.675734	-4.99867	5.77271e-07	2.28481e-05
XLOC_007176	19.983	-3.288	0.565625	-5.81303	6.13508e-09	3.88845e-07
XLOC_008046	17.2661	-3.15955	0.657039	-4.80878	1.51854e-06	5.24979e-05
XLOC_048611	10.1741	-3.15658	0.647999	-4.87128	1.10877e-06	4.03647e-05	TM4SF4
XLOC_003415	14.0835	-3.15547	0.643198	-4.90591	9.2996e-07	3.45707e-05
XLOC_050600	2864.14	-3.15472	0.248508	-12.6947	6.33067e-37	7.74571e-34	wnt5b
XLOC_050600	2864.14	-3.15472	0.248508	-12.6947	6.33067e-37	7.74571e-34	LRTM2
XLOC_040843	2063.84	-3.12126	0.270948	-11.5198	1.04844e-30	8.19561e-28	FOXC1
XLOC_037832	24.6219	-3.06326	0.518126	-5.91218	3.37603e-09	2.21974e-07
XLOC_061562	17.529	-3.04891	0.655052	-4.65446	3.24825e-06	0.000101228
XLOC_037337	10.6036	-3.02566	0.655278	-4.61737	3.88633e-06	0.000118617
XLOC_062359	69.3603	-3.01481	0.480669	-6.27212	3.56169e-10	2.80755e-08
XLOC_061125	28.6368	-2.98948	0.509875	-5.86317	4.54104e-09	2.93095e-07
XLOC_048575	723.697	-2.92503	0.646968	-4.52114	6.15073e-06	0.000177526	unknown
XLOC_071761	11.7834	-2.92035	0.644235	-4.53304	5.81398e-06	0.00016902
XLOC_019574	108.526	-2.91083	0.4528	-6.4285	1.28869e-10	1.08578e-08	GATA6
XLOC_062911	36.747	-2.90515	0.543646	-5.34382	9.10082e-08	4.41866e-06
XLOC_040207	297.417	-2.90487	0.386735	-7.51126	5.85628e-14	8.11831e-12	unknown
XLOC_004800	10.84	-2.81399	0.645928	-4.35651	1.32155e-05	0.00034473
XLOC_063579	298.61	-2.81192	0.28732	-9.78672	1.28389e-22	5.16143e-20	Meox2
XLOC_063579	298.61	-2.81192	0.28732	-9.78672	1.28389e-22	5.16143e-20	meox2
XLOC_047640	13.2093	-2.80673	0.591775	-4.7429	2.10684e-06	7.002e-05
XLOC_030205	360.613	-2.79438	0.320173	-8.72771	2.5987e-18	6.89906e-16	Bco2
XLOC_023211	76.6695	-2.76433	0.485157	-5.69781	1.2136e-08	7.26635e-07	Stard13
XLOC_044327	21.4031	-2.73414	0.608725	-4.49159	7.06926e-06	0.000198143
XLOC_017796	77.5262	-2.69468	0.385698	-6.98651	2.81801e-12	3.17206e-10	ATP6V1B2
XLOC_024913	27.7714	-2.69456	0.647739	-4.15995	3.18323e-05	0.00073126	unknown
XLOC_024913	27.7714	-2.69456	0.647739	-4.15995	3.18323e-05	0.00073126	Rnf17
XLOC_065721	8.31315	-2.6903	0.666627	-4.03569	5.44413e-05	0.00115678	atp6v0a1
XLOC_042234	1062.37	-2.66873	0.477967	-5.58349	2.35741e-08	1.34837e-06	GREM1
XLOC_060867	23.1105	-2.65278	0.634253	-4.18253	2.88282e-05	0.000673798	SLC7A2
XLOC_009186	56.646	-2.6267	0.468259	-5.60949	2.0292e-08	1.17497e-06
XLOC_070110	16.489	-2.61875	0.584508	-4.48026	7.45507e-06	0.000206693	ZP3
XLOC_057784	16.208	-2.61783	0.619026	-4.22894	2.34793e-05	0.00056521
XLOC_003146	7.77997	-2.61401	0.66019	-3.95948	7.51129e-05	0.00153616
XLOC_018854	1187.51	-2.60943	0.469007	-5.56373	2.6407e-08	1.48922e-06	TWIST1
XLOC_046236	9.18775	-2.60567	0.641999	-4.05868	4.93511e-05	0.00106095	Dmbt1
XLOC_051218	16.364	-2.59473	0.641102	-4.04729	5.18132e-05	0.00110746
XLOC_061853	11.9475	-2.58256	0.595223	-4.33881	1.43253e-05	0.000368154
XLOC_017797	43.6904	-2.57319	0.400116	-6.43111	1.26674e-10	1.07049e-08	ATP6V1B2
XLOC_036907	29.0496	-2.5652	0.553285	-4.63631	3.54691e-06	0.000109565
XLOC_044172	195.818	-2.55438	0.395178	-6.46386	1.02065e-10	8.73016e-09	tf
XLOC_072156	8.96973	-2.54469	0.662158	-3.84302	0.000121527	0.00230918
XLOC_020530	61.656	-2.54005	0.479901	-5.29286	1.2042e-07	5.64791e-06
XLOC_024504	14.7221	-2.53615	0.613472	-4.13409	3.5636e-05	0.000802908
XLOC_036487	11.4655	-2.50684	0.602241	-4.16253	3.14744e-05	0.000724813
XLOC_050836	20.6413	-2.50464	0.657247	-3.8108	0.000138517	0.00258318
XLOC_036111	32.8952	-2.49004	0.585454	-4.25317	2.10765e-05	0.000514857	Smtn
XLOC_062358	11.8834	-2.48944	0.644305	-3.86376	0.000111653	0.0021565
XLOC_040147	740.057	-2.47573	0.26559	-9.32161	1.14587e-20	3.83879e-18	Wnt8a
XLOC_040147	740.057	-2.47573	0.26559	-9.32161	1.14587e-20	3.83879e-18	sec31a
XLOC_003571	41.0884	-2.47369	0.433891	-5.70118	1.18979e-08	7.15426e-07	CYP7B1
XLOC_070268	7.21298	-2.44698	0.677572	-3.61139	0.000304557	0.00492277
XLOC_064051	7.23716	-2.43442	0.666987	-3.64988	0.000262364	0.00436101
XLOC_033725	17.2535	-2.42504	0.599029	-4.04828	5.15944e-05	0.00110412
XLOC_055501	139.622	-2.4175	0.301871	-8.00839	1.16223e-15	2.057e-13	TCHH
XLOC_065016	58.9433	-2.40499	0.49891	-4.82049	1.43205e-06	4.99373e-05	FTCD
XLOC_007856	6.63836	-2.38924	0.677442	-3.52686	0.00042052	0.00643143	unknown
XLOC_000630	6.52478	-2.38503	0.677371	-3.52102	0.000429897	0.00654639	unknown
XLOC_006470	86.1746	-2.38251	0.523135	-4.55429	5.25616e-06	0.000155208	shha
XLOC_022799	13.9777	-2.37731	0.610787	-3.89222	9.93325e-05	0.00195613
XLOC_008118	66.4147	-2.37696	0.482445	-4.92689	8.35467e-07	3.15288e-05	FRMD3
XLOC_006872	268.243	-2.36932	0.474913	-4.98896	6.07059e-07	2.38453e-05	Psmc3ip
XLOC_064791	8.92798	-2.35303	0.645849	-3.64332	0.000269147	0.00444773
XLOC_035138	16.6326	-2.34535	0.585927	-4.00281	6.25959e-05	0.00130967	unknown
XLOC_050640	236.992	-2.33988	0.301572	-7.75893	8.56491e-15	1.31708e-12
XLOC_035746	55.0421	-2.32372	0.547344	-4.24546	2.18147e-05	0.000531106
XLOC_057970	23.7009	-2.32263	0.49363	-4.7052	2.53614e-06	8.24129e-05
XLOC_028575	192.907	-2.32091	0.587057	-3.95347	7.70268e-05	0.00157073	COL2A1
XLOC_004983	49.5584	-2.29605	0.412043	-5.57234	2.51334e-08	1.42597e-06	ATP6V0A4
XLOC_032477	38.3489	-2.29097	0.544083	-4.2107	2.54577e-05	0.000606095	unknown
XLOC_039743	12.3371	-2.28948	0.633064	-3.6165	0.000298612	0.00484895
XLOC_003248	68.8193	-2.2783	0.422289	-5.39511	6.84831e-08	3.40911e-06	ATP6V1E1
XLOC_043589	438.522	-2.26967	0.338539	-6.70432	2.02342e-11	1.99793e-09
XLOC_027001	133.164	-2.26862	0.614028	-3.69466	0.000220182	0.00377814	fgg
XLOC_006525	95.1807	-2.26442	0.435388	-5.20093	1.98299e-07	8.80177e-06
XLOC_054475	10.926	-2.25351	0.664824	-3.38964	0.000699855	0.00959084
XLOC_000324	2226.65	-2.25324	0.17564	-12.8287	1.13185e-37	1.59258e-34	Prdm1
XLOC_026382	208.365	-2.24461	0.373593	-6.00818	1.87619e-09	1.31666e-07	Fos
XLOC_056557	10.2233	-2.24372	0.66375	-3.38036	0.000723898	0.00984116
XLOC_050835	14.5293	-2.24219	0.672197	-3.33562	0.000851098	0.0111089
XLOC_010705	502.675	-2.23515	0.262519	-8.51423	1.67704e-17	4.03365e-15	FOXC1
XLOC_069119	12.8442	-2.23204	0.608888	-3.66576	0.000246606	0.0041308
XLOC_020470	7.52805	-2.23119	0.662372	-3.36849	0.00075582	0.0101538
XLOC_061924	8.07547	-2.22961	0.668718	-3.33415	0.000855617	0.011158
XLOC_010359	894.993	-2.22226	0.240743	-9.23084	2.68511e-20	8.58655e-18	SCX
XLOC_045227	1416.12	-2.22019	0.202964	-10.9388	7.51482e-28	4.59728e-25
XLOC_034561	38.5704	-2.21966	0.630032	-3.52309	0.000426539	0.00650562	gsc
XLOC_053296	35.5377	-2.21315	0.481761	-4.59387	4.35107e-06	0.000131486
XLOC_061493	59.4249	-2.2033	0.412557	-5.34059	9.2645e-08	4.4873e-06
XLOC_005355	21.8369	-2.20281	0.53264	-4.13565	3.53944e-05	0.000799385
XLOC_046176	11.4293	-2.20203	0.650329	-3.38603	0.000709125	0.00967304
XLOC_057877	35.3839	-2.20085	0.676357	-3.25398	0.00113801	0.0139846	Actl6a
XLOC_056953	47.6532	-2.20022	0.591893	-3.71726	0.000201397	0.00350713
XLOC_046406	94.404	-2.19694	0.31414	-6.99351	2.68099e-12	3.04216e-10	FGF19
XLOC_023947	473.743	-2.19378	0.499397	-4.39286	1.11868e-05	0.00029755	WNT7A
XLOC_015032	4080.53	-2.18825	0.177522	-12.3266	6.50989e-35	6.54267e-32
XLOC_018767	648.996	-2.18602	0.592766	-3.68782	0.000226182	0.0038529
XLOC_052372	6.28772	-2.18577	0.677913	-3.22426	0.00126298	0.0151344
XLOC_033534	101.564	-2.18338	0.438241	-4.98215	6.28828e-07	2.44756e-05	LYPD6
XLOC_011354	7.83993	-2.18036	0.671614	-3.24645	0.00116855	0.0142788
XLOC_066193	50.6963	-2.17578	0.527367	-4.12575	3.69536e-05	0.000829506
XLOC_047871	28.1797	-2.17538	0.465199	-4.67623	2.92191e-06	9.29101e-05	CDH3
XLOC_021571	11.7877	-2.17376	0.620624	-3.50253	0.000460854	0.00691675	RBFOX3
XLOC_021571	11.7877	-2.17376	0.620624	-3.50253	0.000460854	0.00691675	RBFOX1
XLOC_025482	58.9976	-2.16629	0.465168	-4.65701	3.2083e-06	0.000100316	C05D11.1
XLOC_025482	58.9976	-2.16629	0.465168	-4.65701	3.2083e-06	0.000100316	Atp6v1g1
XLOC_045675	6.22141	-2.16403	0.668768	-3.23585	0.00121281	0.0147237
XLOC_044497	8.66625	-2.15396	0.659852	-3.26431	0.00109731	0.013601
XLOC_070148	11.5431	-2.14906	0.592492	-3.62715	0.00028657	0.00468315
XLOC_050235	42.708	-2.14534	0.452355	-4.74259	2.10998e-06	7.002e-05
XLOC_020696	383.323	-2.14058	0.350541	-6.10652	1.01826e-09	7.56062e-08	CYP26A1
XLOC_045867	66.261	-2.13645	0.390991	-5.46419	4.65018e-08	2.43699e-06	CENPJ
XLOC_026423	138.174	-2.12262	0.580696	-3.6553	0.000256877	0.00427992	Foxa2
XLOC_006135	82.1252	-2.11775	0.469926	-4.50655	6.5889e-06	0.000186163
XLOC_006952	84.8911	-2.11548	0.492739	-4.2933	1.76037e-05	0.000438395	FTCD
XLOC_058753	10.4757	-2.10416	0.657321	-3.20112	0.00136895	0.0160918
XLOC_065760	78.7299	-2.10063	0.434581	-4.83368	1.34032e-06	4.75036e-05
XLOC_026326	87.3465	-2.09844	0.398953	-5.25987	1.44156e-07	6.57489e-06
XLOC_029168	76.8552	-2.09454	0.50933	-4.11234	3.91666e-05	0.000870607
XLOC_014009	27.4564	-2.08956	0.464812	-4.49549	6.94093e-06	0.000194935	NATD1
XLOC_071182	42.0104	-2.08874	0.616841	-3.38619	0.000708715	0.00967214
XLOC_021037	29.8135	-2.08861	0.562942	-3.71017	0.000207124	0.00358909
XLOC_026327	98.9051	-2.07968	0.373161	-5.57313	2.50207e-08	1.42244e-06	RBM46
XLOC_006490	89.9205	-2.0716	0.472818	-4.38138	1.17929e-05	0.00031161	unknown
XLOC_024685	140.594	-2.06892	0.589499	-3.50961	0.000448757	0.0067713	Slc1a6
XLOC_024685	140.594	-2.06892	0.589499	-3.50961	0.000448757	0.0067713	gtf2f1
XLOC_001763	89.0233	-2.06787	0.329945	-6.26733	3.67284e-10	2.87904e-08
XLOC_032495	9.24562	-2.06134	0.673481	-3.06073	0.00220798	0.0235104
XLOC_057256	27.1225	-2.04634	0.589565	-3.47093	0.000518659	0.00755856	DDB_G0285049
XLOC_039759	10.0518	-2.04155	0.620927	-3.28791	0.00100935	0.0127129
XLOC_063996	11.1524	-2.03479	0.630577	-3.22687	0.0012515	0.0150579
XLOC_008308	33.6426	-2.03388	0.458534	-4.43562	9.1808e-06	0.000249139	STRA6
XLOC_062734	38.9137	-2.03313	0.521773	-3.89659	9.75577e-05	0.00192658
XLOC_033380	18.6643	-2.03212	0.550513	-3.69132	0.000223093	0.00381645
XLOC_000198	16.3788	-2.03086	0.56798	-3.57559	0.00034944	0.00554004
XLOC_062305	18.51	-2.0208	0.629908	-3.20808	0.00133623	0.0158127
XLOC_011767	138.645	-2.02023	0.658645	-3.06726	0.00216032	0.0230979	jdp2
XLOC_006397	27.1672	-2.01628	0.581592	-3.46684	0.000526622	0.00763508	hox-epsilon4
XLOC_012712	747.786	-2.01168	0.199107	-10.1035	5.33149e-24	2.54294e-21	gata1-a
XLOC_053615	22.4227	-2.01145	0.570488	-3.52583	0.000422155	0.00644944
XLOC_050465	28.1416	-2.00671	0.538793	-3.72445	0.000195738	0.0034234	KL
XLOC_033528	18.1047	-2.00553	0.562026	-3.56839	0.000359175	0.00567203	PDIA5
XLOC_054833	9.92647	-2.00338	0.633588	-3.16196	0.00156709	0.0179113	unknown
XLOC_044243	19.4276	-2.00187	0.589212	-3.39754	0.000679935	0.00939326	MYO7A
XLOC_001563	44.573	-1.9971	0.48228	-4.14096	3.45856e-05	0.000783634
XLOC_038015	501.425	-1.98387	0.196729	-10.0843	6.48423e-24	2.99136e-21	Cdkl1
XLOC_038015	501.425	-1.98387	0.196729	-10.0843	6.48423e-24	2.99136e-21	cdkl1
XLOC_000063	142.01	-1.97843	0.60316	-3.28011	0.00103766	0.0129723	atp6v1c1b
XLOC_005505	62.2557	-1.97798	0.465017	-4.25358	2.10383e-05	0.000514816	SHH
XLOC_062172	28.6889	-1.97516	0.500628	-3.94535	7.96819e-05	0.00161784	ZP3
XLOC_011513	769.159	-1.97451	0.655149	-3.01383	0.00257971	0.0265335	FOSL1
XLOC_049362	13.7735	-1.97288	0.556149	-3.54739	0.000389071	0.00603242
XLOC_009949	8.38617	-1.96756	0.669459	-2.93903	0.00329238	0.0320591
XLOC_070306	112.41	-1.96655	0.469305	-4.19033	2.78545e-05	0.000655689
XLOC_023372	17.7502	-1.96636	0.613376	-3.2058	0.00134685	0.0159184
XLOC_032031	7.71392	-1.96305	0.66966	-2.93141	0.00337429	0.0325879
XLOC_017743	179.295	-1.95421	0.563066	-3.47066	0.000519185	0.00756231	Gpr125
XLOC_017743	179.295	-1.95421	0.563066	-3.47066	0.000519185	0.00756231	GPR124
XLOC_067787	9.01149	-1.95317	0.643421	-3.0356	0.0024006	0.0250762
XLOC_055987	44.2954	-1.95013	0.500064	-3.89975	9.62922e-05	0.00190694
XLOC_000003	68.0418	-1.94621	0.338902	-5.74269	9.31831e-09	5.70058e-07	SLC6A19
XLOC_003742	318.627	-1.94455	0.200742	-9.68682	3.43053e-22	1.34081e-19	HSD3B
XLOC_010584	113.913	-1.93404	0.40296	-4.79958	1.58995e-06	5.45644e-05
XLOC_070000	19.9037	-1.93384	0.575084	-3.3627	0.000771834	0.0103184	ZP3
XLOC_006611	19.1463	-1.93099	0.536084	-3.60202	0.000315751	0.00507746
XLOC_001734	200.731	-1.93065	0.354906	-5.4399	5.33113e-08	2.73765e-06
XLOC_048488	9.19525	-1.93024	0.673766	-2.86486	0.00417198	0.0381677
XLOC_031195	18.4543	-1.92799	0.66884	-2.88259	0.00394424	0.0365596	OLFM4
XLOC_012767	7.41712	-1.92217	0.676219	-2.84253	0.00447571	0.040099	C3
XLOC_063564	656.625	-1.92081	0.173735	-11.056	2.05134e-28	1.31197e-25	unknown
XLOC_009081	27.8821	-1.91496	0.496846	-3.85422	0.000116098	0.00222403
XLOC_027029	23.2387	-1.91098	0.481009	-3.97285	7.10177e-05	0.00146411
XLOC_054221	71.2022	-1.90952	0.670518	-2.84783	0.00440188	0.0395761	Natterin-3
XLOC_034378	7.41741	-1.90552	0.637142	-2.99072	0.00278317	0.0281528
XLOC_058053	41.6351	-1.9022	0.505543	-3.7627	0.000168091	0.0030206	SSP2
XLOC_021840	7.46303	-1.89415	0.653669	-2.89772	0.00375886	0.0352829
XLOC_072011	12.0113	-1.89269	0.638788	-2.96294	0.00304713	0.0302254
XLOC_026667	43.991	-1.89255	0.523933	-3.61221	0.000303604	0.00491761
XLOC_032355	7.282	-1.89177	0.677987	-2.79027	0.00526639	0.0455666
XLOC_018034	257.329	-1.89169	0.261046	-7.24657	4.27448e-13	5.34614e-11
XLOC_011672	17.2601	-1.88475	0.589127	-3.19922	0.00137799	0.016171	Pdgfra
XLOC_011672	17.2601	-1.88475	0.589127	-3.19922	0.00137799	0.016171	ARSD
XLOC_000560	118.64	-1.88157	0.387345	-4.85761	1.18809e-06	4.26454e-05	U88
XLOC_055426	10.1995	-1.86744	0.639126	-2.92187	0.00347935	0.0333139	Gbp1
XLOC_049918	7.92084	-1.86353	0.671687	-2.7744	0.00553043	0.0472901
XLOC_028567	64.8805	-1.85717	0.43069	-4.31209	1.6172e-05	0.000407428	MYL4
XLOC_005443	151.286	-1.85645	0.389056	-4.77167	1.82702e-06	6.18702e-05
XLOC_068709	15.7816	-1.85611	0.671761	-2.76306	0.0057263	0.0485227
XLOC_058725	14.4208	-1.85561	0.666531	-2.78398	0.00536961	0.0462381	MYH1
XLOC_054895	28.2877	-1.85502	0.607988	-3.05108	0.00228017	0.0241227
XLOC_068285	598.683	-1.85361	0.483361	-3.83483	0.00012565	0.0023731
XLOC_061828	7.01533	-1.85267	0.654123	-2.83229	0.00462162	0.0410533
XLOC_047905	9.21683	-1.85258	0.66651	-2.77952	0.00544397	0.046764
XLOC_005189	552.227	-1.85236	0.21739	-8.5209	1.58318e-17	3.84071e-15
XLOC_004370	53.0964	-1.8486	0.544605	-3.39439	0.000687819	0.00945575
XLOC_005121	515.026	-1.84611	0.261906	-7.04874	1.80539e-12	2.0737e-10	hox-alpha4
XLOC_019661	68.2292	-1.8461	0.372827	-4.95163	7.35932e-07	2.81384e-05	COL21A1
XLOC_019661	68.2292	-1.8461	0.372827	-4.95163	7.35932e-07	2.81384e-05	col21a1
XLOC_019060	26.7465	-1.84591	0.468257	-3.94208	8.07775e-05	0.00163557
XLOC_065665	55.1984	-1.84574	0.46898	-3.93565	8.29715e-05	0.00167376
XLOC_050037	15.0378	-1.84379	0.637702	-2.8913	0.00383649	0.0357966
XLOC_028424	17.2403	-1.83891	0.536654	-3.42662	0.000611154	0.00859924
XLOC_002076	349.081	-1.83734	0.237254	-7.74418	9.62014e-15	1.46335e-12	EEF1A
XLOC_033693	20.2936	-1.83453	0.649123	-2.82617	0.00471087	0.0416098	Sema5b
XLOC_066363	8.38775	-1.83112	0.645175	-2.83818	0.00453711	0.0404687
XLOC_068449	47.3005	-1.82581	0.423003	-4.31631	1.58656e-05	0.000401145	DMBT1
XLOC_063078	122.964	-1.82492	0.276699	-6.59531	4.24374e-11	3.88778e-09
XLOC_025699	21.8438	-1.82366	0.578391	-3.153	0.00161603	0.0183671	Ntmt1
XLOC_065762	41.9053	-1.81944	0.604541	-3.00962	0.00261578	0.0268555
XLOC_006134	96.6808	-1.81007	0.424408	-4.26494	1.99955e-05	0.000493159
XLOC_050801	679.969	-1.8069	0.286913	-6.29772	3.02052e-10	2.4036e-08	SMOC2
XLOC_013333	8.99082	-1.80682	0.646415	-2.79514	0.00518777	0.0450444
XLOC_061595	25.8692	-1.80377	0.550491	-3.27667	0.00105041	0.0130737
XLOC_015033	58.8365	-1.79948	0.407581	-4.41501	1.01003e-05	0.000272255
XLOC_065788	20.6073	-1.79714	0.541372	-3.3196	0.00090148	0.0116099
XLOC_059341	17.4719	-1.79571	0.611423	-2.93694	0.00331473	0.0322322
XLOC_008776	49.3464	-1.79404	0.455306	-3.94031	8.13773e-05	0.00164396
XLOC_016626	11.2547	-1.78996	0.616284	-2.90444	0.00367913	0.034707
XLOC_012790	10.5844	-1.78704	0.645655	-2.7678	0.00564368	0.0480396	OCA2
XLOC_061501	10.8992	-1.78259	0.593825	-3.00188	0.00268322	0.0272988	B3GNT9
XLOC_062171	10.8325	-1.78082	0.61549	-2.89334	0.00381168	0.0356242	ZP3
XLOC_014316	9.74734	-1.77778	0.622712	-2.8549	0.00430506	0.0389796
XLOC_038937	261.009	-1.77705	0.245303	-7.2443	4.34693e-13	5.4127e-11	Gata2
XLOC_008364	117.132	-1.77497	0.279883	-6.34181	2.27084e-10	1.83631e-08	tmem2
XLOC_037538	15.3204	-1.77475	0.567968	-3.12473	0.00177965	0.0198106
XLOC_033081	17.8249	-1.76992	0.60324	-2.93403	0.00334594	0.0324397	COL5A1
XLOC_062025	66.1129	-1.76966	0.392607	-4.50746	6.56071e-06	0.000185553
XLOC_000647	15.1414	-1.76655	0.579062	-3.0507	0.00228305	0.024135
XLOC_028678	822.549	-1.76632	0.604218	-2.92331	0.00346331	0.0331897	cxcr4-b
XLOC_058188	7.67084	-1.76608	0.641785	-2.75182	0.00592657	0.0498141
XLOC_066471	15.4233	-1.76259	0.610132	-2.88887	0.00386627	0.035991
XLOC_018642	970.869	-1.76116	0.215942	-8.15571	3.47148e-16	6.69115e-14	RECK
XLOC_020692	86.64	-1.75302	0.338558	-5.17789	2.24406e-07	9.86719e-06	emx1
XLOC_050333	119.177	-1.75255	0.324854	-5.39489	6.85674e-08	3.40911e-06
XLOC_052138	51.6482	-1.75232	0.363332	-4.82291	1.41477e-06	4.94572e-05
XLOC_011863	2673.43	-1.74985	0.185564	-9.4299	4.10491e-21	1.48098e-18	Dact1
XLOC_027236	12.3126	-1.74585	0.563666	-3.09732	0.00195278	0.0213163
XLOC_062546	58.1444	-1.74459	0.386817	-4.51013	6.47881e-06	0.000183791
XLOC_034230	532.515	-1.74131	0.621612	-2.80128	0.00508996	0.0443457	FOS
XLOC_070074	73.0888	-1.73154	0.496604	-3.48677	0.000488893	0.00723722
XLOC_045022	16.4691	-1.72628	0.541252	-3.18942	0.00142558	0.016598
XLOC_029041	21.7477	-1.72457	0.470742	-3.66351	0.000248784	0.00416232
XLOC_009514	17.5907	-1.72176	0.524327	-3.28376	0.00102431	0.0128569	P2rx2
XLOC_034557	46.0123	-1.71997	0.482772	-3.56269	0.000367075	0.00576443	Thbd
XLOC_023074	444.928	-1.71789	0.228784	-7.50876	5.96888e-14	8.19609e-12	TGFBI
XLOC_023074	444.928	-1.71789	0.228784	-7.50876	5.96888e-14	8.19609e-12	Tgfbi
XLOC_017793	167.582	-1.71311	0.322705	-5.30858	1.10481e-07	5.26955e-06	HSPA12A
XLOC_013985	25.2751	-1.71272	0.503279	-3.40313	0.00066619	0.00923966
XLOC_002793	15.2716	-1.7111	0.578869	-2.95594	0.00311718	0.0307575
XLOC_065873	210.606	-1.70872	0.580074	-2.94569	0.00322237	0.0315888
XLOC_038515	8.75213	-1.70511	0.618583	-2.75648	0.00584275	0.0493016
XLOC_035092	1035.82	-1.7027	0.174099	-9.78002	1.37179e-22	5.43713e-20
XLOC_033080	37.7321	-1.69705	0.508287	-3.33876	0.000841532	0.0110301	COL5A1
XLOC_062054	40.8297	-1.69637	0.388977	-4.36112	1.294e-05	0.000338738
XLOC_014817	33.6075	-1.68942	0.485392	-3.48053	0.000500422	0.00736141
XLOC_038466	57.2128	-1.68618	0.35724	-4.72001	2.35829e-06	7.71913e-05
XLOC_042766	34.6001	-1.68552	0.510489	-3.30177	0.000960752	0.0122337	unknown
XLOC_042766	34.6001	-1.68552	0.510489	-3.30177	0.000960752	0.0122337	Nphp1
XLOC_042766	34.6001	-1.68552	0.510489	-3.30177	0.000960752	0.0122337	Elp5
XLOC_042766	34.6001	-1.68552	0.510489	-3.30177	0.000960752	0.0122337	CTDNEP1
XLOC_042766	34.6001	-1.68552	0.510489	-3.30177	0.000960752	0.0122337	ALG3
XLOC_042766	34.6001	-1.68552	0.510489	-3.30177	0.000960752	0.0122337	ACAP3
XLOC_069237	28.6449	-1.68474	0.556155	-3.02926	0.00245151	0.0254929
XLOC_017509	107.339	-1.68167	0.343578	-4.89457	9.85231e-07	3.63373e-05	HOXB1
XLOC_022201	18.232	-1.67832	0.541502	-3.09938	0.00193925	0.021185
XLOC_038675	22.8192	-1.66595	0.556998	-2.99094	0.00278119	0.0281504	UROC1
XLOC_054501	32.985	-1.66367	0.504766	-3.29594	0.000980946	0.0124514
XLOC_071407	40.8989	-1.66298	0.582666	-2.85409	0.00431604	0.0390539
XLOC_005174	165.414	-1.65441	0.341794	-4.84037	1.29594e-06	4.60469e-05	TNFAIP6
XLOC_052322	21.2545	-1.65284	0.519216	-3.18334	0.00145586	0.0168807
XLOC_039471	53.2561	-1.64828	0.395925	-4.16311	3.13942e-05	0.000723557	SVEP1
XLOC_021485	19.583	-1.64786	0.573301	-2.87434	0.00404875	0.0373071
XLOC_070768	368.25	-1.64512	0.196582	-8.36866	5.82768e-17	1.33331e-14
XLOC_067395	52.4916	-1.63847	0.437355	-3.74633	0.000179442	0.00318591
XLOC_060067	54.125	-1.63799	0.473061	-3.46253	0.000535122	0.00773439	CKMT1
XLOC_009428	75.3373	-1.63076	0.525987	-3.10038	0.00193273	0.0211301	lhx1
XLOC_022369	659.882	-1.62317	0.197342	-8.22512	1.94989e-16	3.94476e-14	Gse1
XLOC_011862	275.26	-1.62124	0.21537	-7.52767	5.16525e-14	7.34117e-12
XLOC_039706	13.5579	-1.61943	0.552486	-2.93116	0.00337694	0.0326006
XLOC_055093	141.462	-1.61402	0.361865	-4.46029	8.18491e-06	0.000224933	crhr2
XLOC_020701	28.9414	-1.614	0.518284	-3.11412	0.00184494	0.0203682	LGI1
XLOC_028551	213.626	-1.61235	0.289984	-5.56013	2.69579e-08	1.51359e-06	Tnfaip6
XLOC_065609	19.529	-1.61052	0.580132	-2.77613	0.00550106	0.0471393
XLOC_071655	29.5788	-1.60349	0.544595	-2.94437	0.00323614	0.0316837
XLOC_037509	17.324	-1.60146	0.574183	-2.7891	0.00528542	0.0456809
XLOC_033079	132.946	-1.59742	0.304989	-5.23764	1.62647e-07	7.34658e-06	Olfm1
XLOC_015881	26.0646	-1.59421	0.516758	-3.08502	0.00203537	0.0220213	unknown
XLOC_015881	26.0646	-1.59421	0.516758	-3.08502	0.00203537	0.0220213	Adamtsl1
XLOC_005490	176.014	-1.59215	0.287224	-5.54323	2.96935e-08	1.64814e-06	FOXD1
XLOC_006476	28.174	-1.58222	0.469691	-3.36863	0.000755427	0.0101538
XLOC_002560	16.3356	-1.58171	0.537331	-2.94364	0.00324381	0.0317399
XLOC_007187	33.467	-1.58121	0.472348	-3.34756	0.000815251	0.0107507
XLOC_034280	45.5224	-1.58055	0.415877	-3.80052	0.000144394	0.00266278	RCE1
XLOC_045043	43.2261	-1.57961	0.384839	-4.1046	4.0502e-05	0.00089534
XLOC_012697	31.2891	-1.57806	0.496147	-3.18064	0.00146951	0.0170118
XLOC_001644	38.704	-1.57687	0.492451	-3.20208	0.00136441	0.0160585
XLOC_065019	49.2592	-1.56932	0.446716	-3.51303	0.000443033	0.00671011
XLOC_033431	23.4408	-1.56266	0.463726	-3.36979	0.000752244	0.0101238
XLOC_047809	8295.62	-1.55215	0.135769	-11.4323	2.88413e-30	2.19358e-27	TRIM71
XLOC_019502	24.7181	-1.54875	0.513502	-3.01605	0.00256093	0.0264079
XLOC_053316	703.49	-1.54811	0.216719	-7.14341	9.10468e-13	1.07203e-10	CBFA2T3
XLOC_053316	703.49	-1.54811	0.216719	-7.14341	9.10468e-13	1.07203e-10	Cbfa2t3
XLOC_069582	254.653	-1.54427	0.260311	-5.93241	2.98512e-09	1.98592e-07
XLOC_024812	678.874	-1.54286	0.225774	-6.83366	8.27742e-12	8.78999e-10
XLOC_017629	309.789	-1.53779	0.238063	-6.4596	1.04979e-10	8.95215e-09	Slc4a11
XLOC_059330	460.422	-1.53419	0.195854	-7.83335	4.75023e-15	7.72694e-13	unknown
XLOC_031860	22.0511	-1.53021	0.515534	-2.96821	0.0029954	0.0298701	unknown
XLOC_017729	405.434	-1.52366	0.228843	-6.65813	2.77339e-11	2.66368e-09	unknown
XLOC_024674	83.3504	-1.52014	0.303713	-5.00519	5.58058e-07	2.22441e-05
XLOC_029840	70.7071	-1.50359	0.411555	-3.65343	0.00025876	0.00430874
XLOC_044245	87.2563	-1.49722	0.297848	-5.0268	4.98744e-07	2.01365e-05	MYO7A
XLOC_019833	11125.6	-1.49381	0.139549	-10.7045	9.69126e-27	5.45443e-24	Tgif1
XLOC_019833	11125.6	-1.49381	0.139549	-10.7045	9.69126e-27	5.45443e-24	Dlgap3
XLOC_063754	56.8763	-1.49345	0.471522	-3.16729	0.00153868	0.0176449
XLOC_053804	30.2051	-1.49202	0.482489	-3.09233	0.0019859	0.0216023
XLOC_018544	343.026	-1.48943	0.345256	-4.31399	1.60335e-05	0.000404662	Nrp2
XLOC_018544	343.026	-1.48943	0.345256	-4.31399	1.60335e-05	0.000404662	Nrp1
XLOC_006962	68.6469	-1.48832	0.297316	-5.00584	5.56194e-07	2.22012e-05	RIMKLB
XLOC_053812	192.515	-1.48731	0.24981	-5.95375	2.62061e-09	1.78132e-07	tmem151b
XLOC_052421	917.817	-1.4811	0.179736	-8.24039	1.71647e-16	3.60471e-14
XLOC_068601	31.4128	-1.48046	0.441096	-3.35631	0.00078989	0.0104999
XLOC_034473	392.575	-1.47098	0.278038	-5.29057	1.21934e-07	5.69185e-06	Actin%2C
XLOC_026255	302.34	-1.4698	0.180036	-8.16394	3.24279e-16	6.29347e-14
XLOC_027102	125.939	-1.46324	0.307623	-4.75662	1.96864e-06	6.62673e-05	Shisa2
XLOC_032966	39.7669	-1.46203	0.467855	-3.12496	0.00177828	0.0198032	OLFML2B
XLOC_041651	32.0462	-1.46046	0.428966	-3.40462	0.000662574	0.00919403	unknown
XLOC_040212	37.0111	-1.45829	0.476795	-3.05853	0.00222428	0.0236309	unknown
XLOC_040212	37.0111	-1.45829	0.476795	-3.05853	0.00222428	0.0236309	TBATA
XLOC_014118	19.1067	-1.45728	0.528527	-2.75725	0.0058289	0.0492142
XLOC_001657	162.111	-1.45712	0.399964	-3.64312	0.000269348	0.0044482
XLOC_007212	21.4735	-1.4512	0.505825	-2.86899	0.0041179	0.0377952
XLOC_025469	68.4247	-1.44988	0.497669	-2.91334	0.00357583	0.0339783
XLOC_056432	18.6272	-1.44858	0.492355	-2.94214	0.0032595	0.0318492
XLOC_025596	119.503	-1.44656	0.275159	-5.25717	1.4629e-07	6.66141e-06
XLOC_019058	19.9427	-1.44251	0.500466	-2.88234	0.00394736	0.0365644
XLOC_044137	982.905	-1.44013	0.412629	-3.49013	0.000482779	0.00716554	unknown
XLOC_066006	95.7705	-1.42934	0.47173	-3.02999	0.00244564	0.0254522
XLOC_015669	78.6231	-1.42933	0.346198	-4.12864	3.64911e-05	0.000821518
XLOC_038178	992.046	-1.42596	0.234265	-6.08693	1.15095e-09	8.45664e-08	SLC10A1
XLOC_013645	56.9795	-1.42511	0.461178	-3.09015	0.00200055	0.0217197
XLOC_057273	124.183	-1.41957	0.385763	-3.67989	0.000233334	0.00394844
XLOC_005412	102.471	-1.41426	0.333706	-4.23805	2.25472e-05	0.000545103	Naa15
XLOC_067752	33.6706	-1.41266	0.464917	-3.03852	0.00237741	0.0248709
XLOC_008073	767.788	-1.40771	0.490724	-2.86863	0.00412248	0.0378131	NDUFA13
XLOC_006930	50.5085	-1.40222	0.438192	-3.20001	0.00137425	0.0161338	meox2
XLOC_034345	956.806	-1.39811	0.254573	-5.49199	3.97435e-08	2.11822e-06	Fbln5
XLOC_034345	956.806	-1.39811	0.254573	-5.49199	3.97435e-08	2.11822e-06	Efemp2
XLOC_042224	32.1534	-1.39601	0.461926	-3.02215	0.00250985	0.0259572	Flvcr1
XLOC_057746	498.047	-1.39476	0.466341	-2.99086	0.00278193	0.0281504	PPP3R1
XLOC_057746	498.047	-1.39476	0.466341	-2.99086	0.00278193	0.0281504	PNO1
XLOC_015731	1073	-1.39203	0.160196	-8.68956	3.63839e-18	9.32883e-16	IDH3A
XLOC_023058	4902.34	-1.39157	0.213951	-6.50414	7.81382e-11	6.85011e-09	zgc110179
XLOC_023058	4902.34	-1.39157	0.213951	-6.50414	7.81382e-11	6.85011e-09	Cdx1
XLOC_009416	18.67	-1.38801	0.491744	-2.82263	0.00476308	0.0419756
XLOC_020509	9479.7	-1.38317	0.195637	-7.07009	1.54831e-12	1.79304e-10	SFRP5
XLOC_020509	9479.7	-1.38317	0.195637	-7.07009	1.54831e-12	1.79304e-10	SFRP1
XLOC_002852	102.125	-1.38055	0.37464	-3.68501	0.000228693	0.00388391
XLOC_060487	53.06	-1.37797	0.372133	-3.70289	0.000213159	0.00367733
XLOC_025683	195.386	-1.37369	0.281714	-4.87618	1.08161e-06	3.95806e-05	col-99
XLOC_003185	165.582	-1.37018	0.264001	-5.19005	2.10242e-07	9.30253e-06	EYA4
XLOC_003185	165.582	-1.37018	0.264001	-5.19005	2.10242e-07	9.30253e-06	Eya4
XLOC_035452	27.1271	-1.36956	0.485219	-2.82256	0.00476423	0.0419756
XLOC_009238	395.036	-1.35857	0.468425	-2.90029	0.00372816	0.035018	Abcb9
XLOC_033051	65.9842	-1.35433	0.349508	-3.87497	0.000106639	0.00207821	TNNC2
XLOC_001921	570.186	-1.35353	0.171438	-7.89515	2.89969e-15	4.88624e-13	MPPED2
XLOC_010650	61.6532	-1.35242	0.425755	-3.17652	0.00149055	0.0172122	FH13
XLOC_038794	47.7748	-1.34963	0.394023	-3.42527	0.000614195	0.00862909
XLOC_020578	1471.21	-1.34736	0.164117	-8.20974	2.21665e-16	4.42403e-14
XLOC_031136	32.3082	-1.34471	0.453754	-2.96352	0.00304139	0.0301961
XLOC_054500	42.9265	-1.33915	0.373084	-3.58939	0.000331448	0.00529058
XLOC_026229	2100.38	-1.33666	0.143074	-9.34248	9.41017e-21	3.22941e-18	EML1
XLOC_060501	45.046	-1.33313	0.455872	-2.92435	0.00345181	0.0331188
XLOC_007008	54.1335	-1.33262	0.461158	-2.88972	0.00385586	0.0359198
XLOC_011625	2402.1	-1.33184	0.454337	-2.93139	0.00337448	0.0325879	XPOT
XLOC_011625	2402.1	-1.33184	0.454337	-2.93139	0.00337448	0.0325879	otx5
XLOC_063857	46.247	-1.32787	0.383083	-3.46626	0.000527744	0.0076474
XLOC_011457	91.2234	-1.31852	0.378731	-3.48142	0.000498766	0.00734472	Actin%2C
XLOC_065064	717.443	-1.31261	0.191641	-6.84932	7.42002e-12	7.96972e-10
XLOC_003918	4240.24	-1.30815	0.198806	-6.58004	4.70323e-11	4.26947e-09	NTN3
XLOC_003918	4240.24	-1.30815	0.198806	-6.58004	4.70323e-11	4.26947e-09	NTN1
XLOC_029732	34.9322	-1.30726	0.45323	-2.88431	0.00392274	0.0364203
XLOC_062083	100.862	-1.30432	0.2968	-4.39463	1.10962e-05	0.000295699
XLOC_026207	3021.53	-1.29922	0.203833	-6.37396	1.84207e-10	1.52192e-08	NFKBIA
XLOC_033771	193.95	-1.29568	0.2295	-5.64565	1.64555e-08	9.68773e-07	PTH2R
XLOC_000929	50.2877	-1.29365	0.399861	-3.23524	0.00121543	0.0147315
XLOC_058331	38.0267	-1.29082	0.392899	-3.28538	0.00101845	0.0128004
XLOC_057744	1756.44	-1.29051	0.437163	-2.95201	0.00315711	0.0310645	otx2
XLOC_044305	37.5896	-1.2904	0.405098	-3.18541	0.00144548	0.0167811	Col3a1
XLOC_066953	114.46	-1.28194	0.305723	-4.19315	2.75111e-05	0.000649488
XLOC_018532	40847.8	-1.27827	0.120738	-10.5871	3.41867e-26	1.74918e-23	RHEB
XLOC_006913	213.849	-1.27755	0.247999	-5.15145	2.5848e-07	1.12078e-05	RECK
XLOC_046391	45.0686	-1.2718	0.38035	-3.34377	0.000826481	0.0108682	chrnd
XLOC_031838	409.707	-1.26635	0.252387	-5.01749	5.23508e-07	2.09858e-05	igf1-a
XLOC_066309	79.8796	-1.26603	0.348035	-3.63764	0.000275148	0.00453053
XLOC_050466	65.3202	-1.26403	0.393048	-3.21597	0.00130004	0.015456
XLOC_068926	68.7434	-1.26281	0.391757	-3.22345	0.00126655	0.0151594
XLOC_006274	212.435	-1.26231	0.326888	-3.86158	0.000112654	0.00217137
XLOC_029049	147.832	-1.26025	0.261365	-4.82179	1.42277e-06	4.96751e-05
XLOC_006407	308.227	-1.25773	0.288705	-4.35647	1.32179e-05	0.00034473	skap-epsilon
XLOC_006396	88.9406	-1.25393	0.401841	-3.12047	0.00180564	0.0200523	hox-epsilon8(exon2)
XLOC_006396	88.9406	-1.25393	0.401841	-3.12047	0.00180564	0.0200523	hox-epsilon7
XLOC_010430	234.71	-1.25138	0.308821	-4.05214	5.07522e-05	0.00108692	unknown
XLOC_010430	234.71	-1.25138	0.308821	-4.05214	5.07522e-05	0.00108692	MYLK3
XLOC_068092	135.128	-1.25128	0.421775	-2.9667	0.0030101	0.029933
XLOC_064286	32.6622	-1.24871	0.421806	-2.96038	0.0030726	0.0304244
XLOC_050332	35.3047	-1.24663	0.403941	-3.08617	0.00202755	0.0219451
XLOC_019630	58.1723	-1.24446	0.371411	-3.35064	0.000806264	0.0106672	Pxdn
XLOC_048244	1110.03	-1.24442	0.166972	-7.45285	9.13435e-14	1.2125e-11	SEMA6A
XLOC_032967	290.048	-1.24024	0.288812	-4.29428	1.75264e-05	0.000437243	OLFML2B
XLOC_006853	571.654	-1.23198	0.273508	-4.50436	6.65733e-06	0.000187719	ITGB1
XLOC_045693	96.8862	-1.22776	0.333931	-3.67669	0.00023628	0.0039911	CRISP3
XLOC_048121	43.0706	-1.223	0.376755	-3.24614	0.0011698	0.0142831
XLOC_048516	44.2324	-1.22191	0.38898	-3.14132	0.0016819	0.0189853	MXRA5
XLOC_016657	29.2312	-1.2216	0.438326	-2.78696	0.00532045	0.0459272	ZP4
XLOC_043685	1334.67	-1.22118	0.239432	-5.10031	3.39097e-07	1.42852e-05	MAP3K15
XLOC_039566	47.6927	-1.22113	0.385506	-3.16759	0.00153706	0.0176405
XLOC_024051	59.973	-1.21697	0.378269	-3.2172	0.00129449	0.0154292	ELK1
XLOC_033593	110.746	-1.21485	0.305141	-3.98127	6.85486e-05	0.00141944	unknown
XLOC_033593	110.746	-1.21485	0.305141	-3.98127	6.85486e-05	0.00141944	MIB
XLOC_001718	193.759	-1.21142	0.348856	-3.47254	0.000515557	0.00753286	COLEC12
XLOC_031867	76.3209	-1.2114	0.378455	-3.20091	0.00136996	0.0160969
XLOC_038931	817.034	-1.2094	0.159415	-7.58647	3.28747e-14	4.79341e-12	ARHGEF3
XLOC_036774	3278.43	-1.20806	0.123075	-9.81562	9.64387e-23	4.05057e-20
XLOC_017525	114.018	-1.20111	0.327807	-3.66408	0.000248234	0.00415559	NKX6-2
XLOC_004909	124.169	-1.20096	0.326675	-3.6763	0.000236638	0.00399235	bcdin3d
XLOC_010265	48.2259	-1.20068	0.406099	-2.95663	0.00311026	0.0307	tppp3
XLOC_070078	48.933	-1.19029	0.416816	-2.85567	0.00429465	0.038923
XLOC_052242	453.33	-1.18998	0.224492	-5.30075	1.15329e-07	5.45456e-06
XLOC_007064	42.1645	-1.18932	0.40504	-2.93631	0.00332138	0.0322857
XLOC_011434	820.462	-1.18848	0.204669	-5.80684	6.36644e-09	4.01699e-07	DUSP10
XLOC_000145	73.6156	-1.18517	0.428049	-2.76877	0.00562676	0.047939	ATP6V1H
XLOC_068314	127.21	-1.17195	0.262783	-4.45976	8.20496e-06	0.000225264
XLOC_024021	3859.41	-1.17105	0.142388	-8.22438	1.96206e-16	3.94476e-14	Sema3f
XLOC_024021	3859.41	-1.17105	0.142388	-8.22438	1.96206e-16	3.94476e-14	CD36
XLOC_045609	35.0186	-1.16934	0.423039	-2.76414	0.00570734	0.0484204
XLOC_018692	255.395	-1.16915	0.291708	-4.00794	6.12509e-05	0.0012844
XLOC_050794	899.444	-1.16182	0.222507	-5.22151	1.77468e-07	7.96511e-06
XLOC_000147	4615.91	-1.16126	0.143477	-8.09369	5.78824e-16	1.07162e-13	RNASEH1
XLOC_056269	42.3736	-1.16064	0.389841	-2.97721	0.00290884	0.0291932
XLOC_037947	687.225	-1.14235	0.273081	-4.18319	2.87453e-05	0.00067242	LTBP3
XLOC_037947	687.225	-1.14235	0.273081	-4.18319	2.87453e-05	0.00067242	Ltbp2
XLOC_016775	979.111	-1.1418	0.226758	-5.03533	4.77036e-07	1.93712e-05	lmo3
XLOC_024811	258.708	-1.13984	0.364554	-3.12668	0.0017679	0.0197344	unknown
XLOC_024811	258.708	-1.13984	0.364554	-3.12668	0.0017679	0.0197344	Rnf220
XLOC_006854	59.7105	-1.13593	0.355827	-3.19236	0.00141117	0.0164574	ITGB1
XLOC_023168	837.721	-1.13438	0.201199	-5.6381	1.71938e-08	1.00592e-06	unknown
XLOC_023168	837.721	-1.13438	0.201199	-5.6381	1.71938e-08	1.00592e-06	MTUS1
XLOC_063327	61.6994	-1.13137	0.333785	-3.38952	0.00070014	0.00959084
XLOC_001919	71.946	-1.12515	0.369318	-3.04656	0.00231479	0.0244253	Parvb
XLOC_001700	388.564	-1.12062	0.191037	-5.86599	4.4647e-09	2.89081e-07	TMEM200A
XLOC_035318	172.926	-1.12014	0.259506	-4.31641	1.58587e-05	0.000401145	Cnot3
XLOC_009255	1687.13	-1.11949	0.14427	-7.75971	8.51256e-15	1.31708e-12	SLC8B1
XLOC_028641	213.97	-1.1167	0.352861	-3.16471	0.00155237	0.0177654	unknown
XLOC_066341	68.1661	-1.11655	0.321831	-3.46935	0.000521713	0.00759127	USP36
XLOC_070646	45.8977	-1.1125	0.397103	-2.80153	0.00508605	0.0443253
XLOC_068385	46.4307	-1.11072	0.357306	-3.10858	0.00187988	0.0206324
XLOC_053723	86.8005	-1.10993	0.35721	-3.10723	0.0018885	0.020711
XLOC_020840	131.091	-1.10662	0.26705	-4.14388	3.41484e-05	0.000777483
XLOC_034266	240.857	-1.10627	0.287656	-3.84582	0.00012015	0.0022892	Basp1
XLOC_011823	74.8023	-1.10457	0.360511	-3.06389	0.00218482	0.0232978	unknown
XLOC_067922	311.794	-1.10341	0.335656	-3.28732	0.00101145	0.0127295
XLOC_045074	71.7725	-1.09996	0.313171	-3.51233	0.000444201	0.00672418
XLOC_035320	82.3038	-1.09238	0.342421	-3.19015	0.001422	0.0165631	Cnot3
XLOC_013642	55.9877	-1.08895	0.38193	-2.85119	0.00435562	0.0392606
XLOC_035083	68.9109	-1.08752	0.36745	-2.95964	0.00307999	0.0304723	Rx
XLOC_031134	236.211	-1.08546	0.193311	-5.61511	1.96434e-08	1.14212e-06
XLOC_024861	894.734	-1.08117	0.166404	-6.49725	8.18008e-11	7.10481e-09	PPAP2C
XLOC_024861	894.734	-1.08117	0.166404	-6.49725	8.18008e-11	7.10481e-09	Ppap2b
XLOC_022367	288.53	-1.0802	0.276518	-3.90645	9.36613e-05	0.00186402	Rrbp1
XLOC_022367	288.53	-1.0802	0.276518	-3.90645	9.36613e-05	0.00186402	Gse1
XLOC_055202	45.5364	-1.07856	0.382958	-2.8164	0.0048565	0.0426684
XLOC_028062	68.8569	-1.07636	0.315147	-3.41543	0.000636808	0.00888468
XLOC_034570	371.304	-1.07571	0.192628	-5.58439	2.34519e-08	1.34411e-06	Ermard
XLOC_020768	239.683	-1.0747	0.27604	-3.89329	9.88918e-05	0.00194882
XLOC_013492	521.312	-1.07368	0.293148	-3.66259	0.000249674	0.00417474
XLOC_056048	1977.58	-1.07349	0.157487	-6.81637	9.33726e-12	9.87819e-10
XLOC_028550	73.3824	-1.06905	0.373973	-2.85864	0.00425457	0.0386718	Tnfaip6
XLOC_019657	54.3135	-1.06903	0.339377	-3.14996	0.0016329	0.0185363
XLOC_025138	686.725	-1.0676	0.1599	-6.67667	2.44433e-11	2.35568e-09
XLOC_039628	103.169	-1.06311	0.288399	-3.68624	0.000227596	0.00386996
XLOC_016655	211.545	-1.06244	0.280235	-3.79124	0.000149895	0.00274622	SIRT3
XLOC_063486	111.41	-1.06094	0.37878	-2.80094	0.00509542	0.0443795
XLOC_069659	532.886	-1.06058	0.208271	-5.09233	3.53691e-07	1.48334e-05
XLOC_017822	78.6967	-1.05804	0.326904	-3.23654	0.0012099	0.0147012
XLOC_006276	91.7352	-1.05733	0.376482	-2.80844	0.00497826	0.0435566
XLOC_030279	486.845	-1.05379	0.157521	-6.68981	2.23457e-11	2.16838e-09	unknown
XLOC_068157	172.741	-1.0521	0.278173	-3.78217	0.000155465	0.00282856
XLOC_027008	2650.17	-1.05203	0.193852	-5.42695	5.73251e-08	2.90664e-06	tdo2b
XLOC_045854	1002.12	-1.04961	0.255318	-4.111	3.93958e-05	0.00087363	unknown
XLOC_045854	1002.12	-1.04961	0.255318	-4.111	3.93958e-05	0.00087363	FZD4
XLOC_022233	3647.86	-1.04632	0.138429	-7.55857	4.07518e-14	5.851e-12
XLOC_006606	748.447	-1.04626	0.24544	-4.26282	2.01867e-05	0.000497003	dlxA
XLOC_062802	173.772	-1.04306	0.25624	-4.07065	4.68824e-05	0.00101695
XLOC_041635	13010	-1.04281	0.103234	-10.1014	5.44558e-24	2.55407e-21	Pes1
XLOC_051885	877.119	-1.03955	0.291479	-3.56646	0.000361841	0.00570772
XLOC_031072	364.205	-1.03887	0.305634	-3.39908	0.000676123	0.00934977	Sema4f
XLOC_031072	364.205	-1.03887	0.305634	-3.39908	0.000676123	0.00934977	Sema4c
XLOC_031072	364.205	-1.03887	0.305634	-3.39908	0.000676123	0.00934977	Aqp3
XLOC_000223	222.373	-1.03621	0.27954	-3.70685	0.000209855	0.00362525
XLOC_068156	147.18	-1.03245	0.296953	-3.47681	0.000507416	0.00744096
XLOC_006821	2024.85	-1.02934	0.117872	-8.7327	2.48659e-18	6.66431e-16	Gbx1
XLOC_017609	347.686	-1.02292	0.206663	-4.94972	7.43202e-07	2.83394e-05	FGFRL1
XLOC_029327	65.5444	-1.02212	0.319703	-3.1971	0.00138816	0.0162564
XLOC_027032	1193.44	-1.02122	0.179115	-5.70146	1.18786e-08	7.15426e-07	pdgfra
XLOC_009213	434.362	-1.01934	0.19764	-5.15757	2.50178e-07	1.09151e-05	foxn4
XLOC_027201	344.4	-1.01865	0.210013	-4.85042	1.23199e-06	4.40525e-05	unknown
XLOC_027201	344.4	-1.01865	0.210013	-4.85042	1.23199e-06	4.40525e-05	LNX2
XLOC_027246	137.7	-1.01847	0.29292	-3.47695	0.000507147	0.00744089	slc46a1
XLOC_031135	82.8908	-1.01733	0.311099	-3.27012	0.001075	0.0133561
XLOC_018557	3207.99	-1.01286	0.124929	-8.10747	5.16829e-16	9.82708e-14	hox-beta1
XLOC_002024	77.5054	-1.0111	0.331018	-3.05451	0.0022543	0.0239029	CLU
XLOC_056267	48.9758	-1.00863	0.350049	-2.88138	0.00395932	0.036662	PHEX
XLOC_004639	81.5997	-1.00623	0.353408	-2.84721	0.00441048	0.0396408
XLOC_064892	79.7268	-1.00502	0.282239	-3.56088	0.000369613	0.00577849	Srrm3
XLOC_013832	243.535	-0.99899	0.241542	-4.13589	3.53583e-05	0.000799211
XLOC_050616	1236.44	-0.993994	0.146769	-6.77252	1.26554e-11	1.29504e-09
XLOC_024623	135.82	-0.993344	0.273768	-3.62841	0.000285167	0.00466563	unknown
XLOC_029534	158.44	-0.993151	0.313583	-3.16711	0.00153963	0.0176483	unknown
XLOC_006272	123.204	-0.99248	0.323163	-3.07115	0.00213239	0.0228514
XLOC_058692	68.6615	-0.991753	0.348353	-2.84698	0.00441364	0.0396566	unknown
XLOC_070769	278.177	-0.989955	0.337342	-2.93457	0.0033401	0.0324228
XLOC_031108	56.5389	-0.98853	0.340197	-2.90576	0.00366368	0.0345972	EFNA3
XLOC_008449	525.739	-0.988515	0.181672	-5.44121	5.29189e-08	2.72557e-06	FOXB1
XLOC_023231	447.14	-0.984849	0.278838	-3.53198	0.000412465	0.00632543	unknown
XLOC_018620	215.091	-0.984676	0.276244	-3.56451	0.000364535	0.00574056	LYPD6
XLOC_050057	107.274	-0.984516	0.264308	-3.72488	0.000195405	0.00341971
XLOC_009466	134.183	-0.984285	0.241643	-4.07331	4.63502e-05	0.00100877	hvcn1
XLOC_022359	269.019	-0.983126	0.247336	-3.97486	7.0421e-05	0.00145287	wtip
XLOC_033046	232.247	-0.980501	0.229788	-4.26698	1.98136e-05	0.000489531	lmo4-a
XLOC_033046	232.247	-0.980501	0.229788	-4.26698	1.98136e-05	0.000489531	lmo4.1
XLOC_024817	68.6861	-0.980314	0.346658	-2.8279	0.00468541	0.0414582	Vitamin
XLOC_012499	203.405	-0.978391	0.334262	-2.92702	0.00342232	0.0328931
XLOC_049788	227.644	-0.977201	0.228317	-4.28002	1.86873e-05	0.000464147	unknown
XLOC_061047	20371.7	-0.974262	0.110372	-8.82706	1.07458e-18	3.0857e-16	Huwe1
XLOC_011430	133.091	-0.97053	0.254551	-3.81271	0.000137453	0.00256843	USH2A
XLOC_050952	234.615	-0.96831	0.271882	-3.5615	0.000368736	0.00577441	ATP13A4
XLOC_000186	864.841	-0.967983	0.161657	-5.98788	2.12594e-09	1.47718e-07
XLOC_044175	116.734	-0.967687	0.346056	-2.79633	0.00516859	0.0449056	DGKD
XLOC_033254	81.9273	-0.963266	0.297717	-3.23551	0.00121426	0.0147287
XLOC_024813	210.349	-0.959865	0.332137	-2.88997	0.00385277	0.0359157	Rnf220
XLOC_006544	110.066	-0.957056	0.291911	-3.27858	0.0010433	0.0130139	PHYH
XLOC_034533	3923.16	-0.951896	0.108083	-8.80709	1.28438e-18	3.61437e-16	RHOU
XLOC_064141	171.431	-0.949333	0.228517	-4.15431	3.26264e-05	0.000746456
XLOC_018810	974.647	-0.949207	0.280578	-3.38304	0.000716892	0.00976848	tut1
XLOC_040082	299.079	-0.948106	0.234393	-4.04494	5.23373e-05	0.00111747	Slc25a16
XLOC_019680	748.549	-0.937654	0.190317	-4.92681	8.35808e-07	3.15288e-05
XLOC_017543	1448.06	-0.935588	0.18242	-5.12877	2.91643e-07	1.24918e-05	EBF3
XLOC_017543	1448.06	-0.935588	0.18242	-5.12877	2.91643e-07	1.24918e-05	coe3
XLOC_038156	185.985	-0.934555	0.256327	-3.64595	0.000266411	0.00441784	LHPP
XLOC_005181	1791.57	-0.93431	0.176754	-5.28593	1.25069e-07	5.77928e-06	Skida1
XLOC_025645	57.7075	-0.931082	0.325267	-2.86251	0.00420296	0.0383389
XLOC_065065	196.044	-0.931046	0.254688	-3.65564	0.000256542	0.0042794
XLOC_035939	417.5	-0.930321	0.266242	-3.49427	0.000475367	0.00708168	GGT1
XLOC_050812	663.484	-0.929937	0.173932	-5.34654	8.96495e-08	4.37232e-06	btbd6a
XLOC_053600	5816.56	-0.924951	0.145677	-6.34935	2.16232e-10	1.76376e-08	meis3-b
XLOC_053600	5816.56	-0.924951	0.145677	-6.34935	2.16232e-10	1.76376e-08	MEIS2
XLOC_053600	5816.56	-0.924951	0.145677	-6.34935	2.16232e-10	1.76376e-08	MEIS1
XLOC_066238	70.0221	-0.924472	0.307765	-3.00382	0.00266613	0.0271937
XLOC_003587	2523.82	-0.921958	0.118293	-7.79385	6.49984e-15	1.03927e-12	TOMM70A
XLOC_003587	2523.82	-0.921958	0.118293	-7.79385	6.49984e-15	1.03927e-12	ACP6
XLOC_034358	150.405	-0.916591	0.293783	-3.11996	0.00180877	0.0200792	unknown
XLOC_069506	327.14	-0.915517	0.262859	-3.48292	0.00049597	0.00731504
XLOC_068105	1604.34	-0.91363	0.248184	-3.68125	0.00023209	0.00393449	TSG101
XLOC_064840	487.193	-0.91332	0.230723	-3.95851	7.54199e-05	0.00154132
XLOC_068505	4143.88	-0.912262	0.256564	-3.55569	0.000376986	0.0058807
XLOC_030309	131.075	-0.91113	0.240915	-3.78196	0.000155595	0.00282856
XLOC_018693	3836.67	-0.910238	0.138861	-6.55504	5.5627e-11	4.98535e-09
XLOC_025530	65.4718	-0.90961	0.329369	-2.76168	0.00575051	0.0486692
XLOC_068937	2067.82	-0.904085	0.22524	-4.01387	5.97324e-05	0.0012563
XLOC_055431	256.152	-0.902136	0.297983	-3.02748	0.00246603	0.0255981
XLOC_003266	3664.54	-0.900972	0.115776	-7.782	7.1386e-15	1.12858e-12
XLOC_005439	234.414	-0.900247	0.244024	-3.68917	0.000224983	0.00383944	CHRNA1
XLOC_024740	926.01	-0.899339	0.206592	-4.35321	1.34156e-05	0.000349563
XLOC_003714	553.504	-0.891434	0.185322	-4.81019	1.50786e-06	5.21927e-05	fam110b
XLOC_037392	6062.6	-0.890375	0.193139	-4.61001	4.02651e-06	0.000122233	Ptprm
XLOC_037392	6062.6	-0.890375	0.193139	-4.61001	4.02651e-06	0.000122233	PTPRK
XLOC_062055	120.422	-0.888977	0.276188	-3.21875	0.00128753	0.0153657
XLOC_069147	353.34	-0.884013	0.231345	-3.8212	0.000132806	0.00248987	BCDIN3D
XLOC_020464	389.432	-0.879	0.180616	-4.86667	1.13493e-06	4.11574e-05	ANKRD1
XLOC_011697	348.434	-0.878047	0.200054	-4.38906	1.13842e-05	0.000302515
XLOC_029642	198.017	-0.875203	0.25946	-3.37318	0.000743057	0.0100386	Trmt112
XLOC_006540	142.083	-0.874411	0.230688	-3.79045	0.000150378	0.00275148	TWIST1
XLOC_033716	5281.76	-0.873458	0.116654	-7.4876	7.01427e-14	9.44443e-12	snx10-delta
XLOC_062037	1623.91	-0.872334	0.155454	-5.61153	2.00546e-08	1.16362e-06
XLOC_024630	1329.57	-0.870878	0.192671	-4.52003	6.1832e-06	0.000178098	Acot11
XLOC_037916	125.637	-0.869913	0.305375	-2.84867	0.00439027	0.0395147	banf1
XLOC_055205	1602.92	-0.868762	0.164542	-5.27988	1.29266e-07	5.95365e-06
XLOC_059110	252.788	-0.867833	0.209876	-4.13499	3.54976e-05	0.000801073
XLOC_023946	2385.73	-0.865189	0.130893	-6.60988	3.84621e-11	3.57215e-09	PRICKLE2
XLOC_067199	178.854	-0.863735	0.268525	-3.21659	0.00129726	0.0154369
XLOC_069291	213.947	-0.863653	0.227413	-3.79772	0.000146031	0.00268592
XLOC_001934	13925.4	-0.861858	0.113633	-7.58458	3.33557e-14	4.83847e-12	ccnd2
XLOC_012711	10800.9	-0.860183	0.118825	-7.23907	4.51767e-13	5.60051e-11
XLOC_068504	2311.91	-0.85971	0.188914	-4.5508	5.34428e-06	0.000156987
XLOC_001864	1324.32	-0.858127	0.191863	-4.47261	7.72705e-06	0.000212974	INSC
XLOC_020489	212.094	-0.85736	0.248325	-3.45258	0.000555262	0.00795378	FGFRL1
XLOC_020489	212.094	-0.85736	0.248325	-3.45258	0.000555262	0.00795378	Fgfrl1
XLOC_010393	488.999	-0.854112	0.204355	-4.17956	2.92076e-05	0.000681535	serpina6
XLOC_018607	5322.52	-0.852944	0.109224	-7.80911	5.75914e-15	9.26103e-13	ARL4A
XLOC_005212	438.531	-0.852515	0.166494	-5.1204	3.04887e-07	1.30195e-05	map3k13-b
XLOC_005212	438.531	-0.852515	0.166494	-5.1204	3.04887e-07	1.30195e-05	Map3k13
XLOC_021414	278.641	-0.852201	0.259901	-3.27894	0.00104197	0.0130031
XLOC_055415	721.904	-0.846973	0.158277	-5.3512	8.73721e-08	4.28352e-06
XLOC_050458	498.468	-0.84629	0.18564	-4.55877	5.14534e-06	0.000152256
XLOC_023042	1178.26	-0.842831	0.248252	-3.39506	0.00068613	0.00944386	unknown
XLOC_047307	573.528	-0.842559	0.159258	-5.29053	1.21964e-07	5.69185e-06
XLOC_000273	192.642	-0.838362	0.22908	-3.65969	0.000252522	0.00421735	unknown
XLOC_028689	3943.59	-0.837653	0.11861	-7.06227	1.63804e-12	1.88918e-10
XLOC_027782	205.364	-0.832435	0.238337	-3.49267	0.000478209	0.00711649
XLOC_069523	768.403	-0.832339	0.157166	-5.29592	1.18419e-07	5.56334e-06
XLOC_010577	6365.26	-0.828772	0.131602	-6.29756	3.02361e-10	2.4036e-08	CFAP20
XLOC_024868	1458.47	-0.827328	0.154657	-5.34944	8.82246e-08	4.31779e-06	KLF2
XLOC_040093	1338.4	-0.824346	0.151598	-5.43772	5.39682e-08	2.75629e-06	Bmp1
XLOC_044191	1175.87	-0.824267	0.162303	-5.07856	3.80297e-07	1.57613e-05	RAB20
XLOC_044191	1175.87	-0.824267	0.162303	-5.07856	3.80297e-07	1.57613e-05	Galnt3
XLOC_034334	1435.8	-0.823881	0.264721	-3.11226	0.00185662	0.020473	BMP4
XLOC_005476	179.211	-0.821058	0.225238	-3.64529	0.000267089	0.00442562
XLOC_036958	526.581	-0.820974	0.17254	-4.75817	1.95353e-06	6.58373e-05
XLOC_051701	2136.11	-0.818068	0.138019	-5.92721	3.08131e-09	2.04507e-07	eral1
XLOC_068916	241.013	-0.817201	0.241103	-3.38943	0.000700373	0.00959084
XLOC_057282	1503.65	-0.815876	0.118292	-6.89716	5.30533e-12	5.80923e-10	unknown
XLOC_015715	1056.97	-0.813429	0.159549	-5.0983	3.42719e-07	1.44162e-05	Fam169a
XLOC_031241	349.54	-0.810745	0.20231	-4.00743	6.13823e-05	0.00128619	Fam189a1
XLOC_046697	83.763	-0.808049	0.29116	-2.77528	0.00551543	0.0472336
XLOC_042276	996.564	-0.807345	0.158967	-5.07868	3.80061e-07	1.57613e-05
XLOC_038001	4785.8	-0.80179	0.150722	-5.31966	1.03962e-07	5.00956e-06	Aspg
XLOC_026364	171.594	-0.800748	0.257466	-3.11011	0.00187016	0.0205579	unknown
XLOC_036773	686.103	-0.796245	0.234913	-3.38953	0.000700133	0.00959084	Gpr157
XLOC_048245	332.251	-0.79503	0.258623	-3.07409	0.00211149	0.0226705	SEMA6A
XLOC_052420	2117.65	-0.794696	0.190136	-4.17962	2.92002e-05	0.000681535	MEX3A
XLOC_052465	353.647	-0.791549	0.21674	-3.65206	0.000260145	0.00432924	Hapln3
XLOC_062689	539.797	-0.787435	0.170112	-4.62893	3.67566e-06	0.000112676
XLOC_067553	129.183	-0.787022	0.268747	-2.92848	0.00340621	0.0328043
XLOC_044099	103.017	-0.786007	0.26233	-2.99626	0.00273318	0.0277369	ACE2
XLOC_043686	1628.11	-0.785539	0.25045	-3.13651	0.0017097	0.0192297
XLOC_016628	4896.92	-0.781075	0.147225	-5.30532	1.12473e-07	5.34627e-06	nav3
XLOC_016628	4896.92	-0.781075	0.147225	-5.30532	1.12473e-07	5.34627e-06	NAV2
XLOC_065736	219.242	-0.779434	0.26614	-2.92867	0.00340421	0.0328043
XLOC_053809	754.535	-0.778017	0.177802	-4.37575	1.21015e-05	0.000318567	Slc35b2
XLOC_053809	754.535	-0.778017	0.177802	-4.37575	1.21015e-05	0.000318567	KIAA0391
XLOC_009356	238.593	-0.771831	0.247414	-3.11959	0.001811	0.020096	MECR
XLOC_057336	196.414	-0.771111	0.227191	-3.3941	0.000688539	0.00946102
XLOC_048598	3557.99	-0.769953	0.163124	-4.72004	2.35797e-06	7.71913e-05
XLOC_060989	1096.24	-0.76972	0.124535	-6.18076	6.37955e-10	4.87845e-08
XLOC_016947	193.943	-0.769388	0.224126	-3.43284	0.000597288	0.00845062
XLOC_008363	2426.56	-0.769092	0.166035	-4.6321	3.6197e-06	0.000111325	Zfand5
XLOC_018764	2237.85	-0.76775	0.16379	-4.68741	2.76689e-06	8.85813e-05	Gbx1
XLOC_066409	812.019	-0.767141	0.167364	-4.58367	4.56878e-06	0.000136777
XLOC_024828	1297.8	-0.766115	0.22775	-3.36384	0.00076867	0.0102865	ptc
XLOC_053762	14669.3	-0.763631	0.227009	-3.36388	0.000768557	0.0102865	MAPK8IP1
XLOC_053762	14669.3	-0.763631	0.227009	-3.36388	0.000768557	0.0102865	Mapk8ip1
XLOC_053762	14669.3	-0.763631	0.227009	-3.36388	0.000768557	0.0102865	Celf2
XLOC_042682	563.018	-0.76231	0.149564	-5.09687	3.45324e-07	1.45041e-05	slc25a36a
XLOC_019211	167.627	-0.759436	0.264632	-2.86979	0.00410747	0.037737
XLOC_019662	161.476	-0.759004	0.274847	-2.76155	0.00575273	0.0486733
XLOC_053369	502.123	-0.754337	0.172058	-4.38421	1.1641e-05	0.000308173	unknown
XLOC_052505	891.507	-0.753172	0.211914	-3.55413	0.000379227	0.005903	Slc12a1
XLOC_043676	1014.2	-0.752159	0.155266	-4.84431	1.2705e-06	4.5257e-05	St3gal6
XLOC_000071	793.903	-0.74979	0.198533	-3.77666	0.000158945	0.00287857
XLOC_000333	163.24	-0.743826	0.2238	-3.32361	0.000888592	0.0114706	Lancl3
XLOC_031736	154.216	-0.739932	0.231438	-3.19711	0.00138814	0.0162564	sidkeyp-117h8.2
XLOC_031736	154.216	-0.739932	0.231438	-3.19711	0.00138814	0.0162564	GOLGA6L22
XLOC_031736	154.216	-0.739932	0.231438	-3.19711	0.00138814	0.0162564	Ank2
XLOC_028671	298.106	-0.736657	0.170586	-4.31839	1.57168e-05	0.000398098	jmjd4
XLOC_014026	251.133	-0.736371	0.239232	-3.07806	0.00208356	0.0224221	Pla2g6
XLOC_006687	262.304	-0.736152	0.199097	-3.69746	0.00021777	0.00373903	ACVR1
XLOC_050056	261.483	-0.735462	0.247227	-2.97484	0.00293142	0.0293779	GATA2
XLOC_066405	1325.02	-0.735449	0.161139	-4.56406	5.01729e-06	0.000148936	GIN1
XLOC_034426	1817.51	-0.734403	0.215909	-3.40145	0.000670299	0.00929207	Crip2
XLOC_034426	1817.51	-0.734403	0.215909	-3.40145	0.000670299	0.00929207	Crip1
XLOC_007995	1798.74	-0.734187	0.17259	-4.25395	2.10033e-05	0.000514816	unknown
XLOC_007995	1798.74	-0.734187	0.17259	-4.25395	2.10033e-05	0.000514816	FAM189A1
XLOC_007995	1798.74	-0.734187	0.17259	-4.25395	2.10033e-05	0.000514816	Fam189a1
XLOC_006469	1300.31	-0.731745	0.213474	-3.4278	0.000608499	0.00856903	FZD8
XLOC_049732	374.257	-0.726127	0.177567	-4.08932	4.32635e-05	0.000949672
XLOC_058132	733.075	-0.724242	0.16393	-4.41799	9.9622e-06	0.000269332
XLOC_067008	381.639	-0.724019	0.16397	-4.41556	1.00751e-05	0.000272095
XLOC_028705	313.229	-0.723541	0.191291	-3.78241	0.000155319	0.00282856	Rbm48
XLOC_028705	313.229	-0.723541	0.191291	-3.78241	0.000155319	0.00282856	dcakd
XLOC_071958	97.0744	-0.72262	0.258187	-2.79882	0.0051289	0.0446021
XLOC_045737	157.577	-0.721284	0.258927	-2.78566	0.00534181	0.0460692	HDX
XLOC_045737	157.577	-0.721284	0.258927	-2.78566	0.00534181	0.0460692	Hdx
XLOC_061812	370.38	-0.720816	0.249495	-2.8891	0.00386347	0.0359768
XLOC_008009	628.049	-0.71839	0.165358	-4.34445	1.39622e-05	0.000360139
XLOC_044753	5616.4	-0.714632	0.121315	-5.89073	3.84485e-09	2.51623e-07	MPHOSPH10
XLOC_011587	160.99	-0.712316	0.219105	-3.25103	0.00114986	0.0140995	Ovol3
XLOC_014049	741.573	-0.712205	0.151623	-4.69721	2.63734e-06	8.49307e-05	St6galnac2
XLOC_031754	2485.88	-0.711588	0.144047	-4.93997	7.81365e-07	2.96953e-05	unknown
XLOC_046246	13331.1	-0.709073	0.0985794	-7.1929	6.34272e-13	7.59534e-11
XLOC_049369	413.896	-0.708715	0.163794	-4.32686	1.51253e-05	0.000385162
XLOC_055330	914.908	-0.708545	0.178686	-3.96531	7.33013e-05	0.00150129	GNAQ
XLOC_016869	860.902	-0.706482	0.220527	-3.20361	0.00135714	0.0159997
XLOC_054025	1813.77	-0.704944	0.143385	-4.91643	8.81362e-07	3.29819e-05
XLOC_024787	175.637	-0.704234	0.25137	-2.80159	0.00508517	0.0443253	PALMD
XLOC_043761	135.993	-0.703363	0.25432	-2.76566	0.00568079	0.0482637
XLOC_056497	1568.87	-0.700468	0.150103	-4.66659	3.0624e-06	9.62895e-05
XLOC_016839	2818.53	-0.695669	0.167046	-4.16453	3.11993e-05	0.000720247	Dennd5a
XLOC_062897	123.292	-0.695626	0.249437	-2.78879	0.00529062	0.0457118
XLOC_041431	777.791	-0.695567	0.184973	-3.76037	0.000169663	0.00304302	unknown
XLOC_022323	480.195	-0.691612	0.159365	-4.3398	1.4261e-05	0.000366836	MAP1LC3A
XLOC_031004	145.351	-0.689219	0.21756	-3.16795	0.00153519	0.0176266	mnmE
XLOC_031004	145.351	-0.689219	0.21756	-3.16795	0.00153519	0.0176266	gtpbp3
XLOC_037930	1255.96	-0.687746	0.150763	-4.56177	5.0724e-06	0.000150414	GPR137C
XLOC_034206	3895	-0.687227	0.129927	-5.28933	1.22766e-07	5.7106e-06	HSP90AA1
XLOC_064377	2430.35	-0.684891	0.223112	-3.06972	0.00214263	0.0229435
XLOC_010337	442.979	-0.684007	0.177082	-3.86265	0.000112164	0.00216488	Uncharacterized
XLOC_056047	890.023	-0.682562	0.165378	-4.12729	3.67058e-05	0.000825031	Dhcr7
XLOC_014850	607.687	-0.681328	0.195593	-3.48339	0.000495109	0.00731001	COL13A1
XLOC_062053	1802.45	-0.680273	0.146319	-4.64925	3.33137e-06	0.000103361
XLOC_029432	295.983	-0.680113	0.216344	-3.14367	0.00166845	0.018876	TRIM9
XLOC_027173	362.947	-0.676698	0.227517	-2.97427	0.00293683	0.0294112
XLOC_017677	838.54	-0.675623	0.165233	-4.08891	4.33413e-05	0.000950638
XLOC_035972	1452.8	-0.6746	0.116033	-5.81387	6.10461e-09	3.87788e-07	DBP10
XLOC_003338	592.059	-0.674381	0.181683	-3.71185	0.000205749	0.00356965	DDX47
XLOC_040044	188.822	-0.674326	0.209636	-3.21666	0.00129694	0.0154369	unknown
XLOC_015684	474.849	-0.672739	0.203996	-3.29781	0.00097442	0.0123853	Mamdc2
XLOC_042816	988.018	-0.671304	0.134562	-4.9888	6.0755e-07	2.38453e-05	ARHGEF5
XLOC_063724	3042.79	-0.67107	0.142679	-4.70334	2.55936e-06	8.29757e-05
XLOC_069146	437.377	-0.670628	0.199665	-3.35876	0.000782921	0.0104319
XLOC_009335	578.964	-0.669634	0.185171	-3.61629	0.000298851	0.00485004	FAM101A
XLOC_010602	1697.87	-0.668958	0.138688	-4.82346	1.41087e-06	4.93928e-05	Tk2
XLOC_010602	1697.87	-0.668958	0.138688	-4.82346	1.41087e-06	4.93928e-05	GIN1
XLOC_005414	11443.4	-0.665956	0.126727	-5.25506	1.47977e-07	6.7165e-06	SALL2
XLOC_024604	444.752	-0.664931	0.169734	-3.91749	8.94744e-05	0.00178955	slc12a9
XLOC_010694	624.153	-0.664224	0.175778	-3.77877	0.000157604	0.00285954
XLOC_007990	439.765	-0.663391	0.208815	-3.17692	0.00148847	0.0172086	ADAMTSL5
XLOC_055020	859.166	-0.663249	0.138737	-4.78064	1.74741e-06	5.93887e-05	FYCO1
XLOC_055020	859.166	-0.663249	0.138737	-4.78064	1.74741e-06	5.93887e-05	Fyco1
XLOC_055020	859.166	-0.663249	0.138737	-4.78064	1.74741e-06	5.93887e-05	DNAJC13
XLOC_017766	14831.8	-0.662111	0.0959276	-6.9022	5.12034e-12	5.62857e-10	Nop56
XLOC_035196	684.939	-0.661657	0.168462	-3.92763	8.57877e-05	0.00172563	unknown
XLOC_036684	2177.28	-0.660106	0.129216	-5.10856	3.24625e-07	1.37787e-05	HES1
XLOC_070929	694.585	-0.659949	0.186828	-3.53239	0.000411817	0.00631895
XLOC_018846	375.366	-0.659688	0.210318	-3.13661	0.00170911	0.0192297	Klf7
XLOC_055201	482.038	-0.658699	0.212427	-3.10082	0.00192983	0.0211066
XLOC_023250	798.555	-0.656581	0.170554	-3.8497	0.000118264	0.00225631	exd1
XLOC_000326	18746.6	-0.651064	0.192985	-3.37365	0.000741782	0.0100262	Lin28b
XLOC_057699	2301	-0.650061	0.193571	-3.35826	0.000784346	0.0104459
XLOC_035354	1228.82	-0.64967	0.11344	-5.727	1.02223e-08	6.19966e-07	fdxr
XLOC_053407	298.616	-0.648647	0.202584	-3.20187	0.00136538	0.0160622
XLOC_050803	1835.96	-0.648199	0.116967	-5.54175	2.99469e-08	1.65567e-06	FLRT3
XLOC_006882	1152.38	-0.647541	0.142366	-4.54841	5.4053e-06	0.000158614	MASTL
XLOC_043719	402.972	-0.646444	0.157365	-4.10794	3.99208e-05	0.000883879	Ankrd6
XLOC_028709	312.911	-0.645813	0.199125	-3.24326	0.0011817	0.0143958	mettl10
XLOC_033482	853.237	-0.645739	0.191349	-3.37467	0.000739043	0.00999875	RARG
XLOC_033482	853.237	-0.645739	0.191349	-3.37467	0.000739043	0.00999875	RARB
XLOC_066135	179.462	-0.644496	0.220384	-2.92442	0.00345093	0.0331188
XLOC_048249	434.699	-0.64289	0.1782	-3.60769	0.000308941	0.00498504	scnm1
XLOC_039521	3327.68	-0.642128	0.12832	-5.00411	5.61216e-07	2.23383e-05	Uncharacterized
XLOC_039521	3327.68	-0.642128	0.12832	-5.00411	5.61216e-07	2.23383e-05	PARS2
XLOC_004988	626.372	-0.642096	0.224238	-2.86346	0.00419047	0.038279	unknown
XLOC_004988	626.372	-0.642096	0.224238	-2.86346	0.00419047	0.038279	Fam221a
XLOC_059286	342.157	-0.641437	0.228523	-2.80689	0.00500229	0.0437308
XLOC_062907	183.013	-0.641248	0.21284	-3.01281	0.00258842	0.0266036
XLOC_071470	375.245	-0.639985	0.191857	-3.33575	0.00085071	0.0111089
XLOC_013682	1970.66	-0.63949	0.215482	-2.96771	0.00300023	0.029876	MYH6
XLOC_011441	9645.96	-0.637331	0.168205	-3.78901	0.00015125	0.00276385	Akap12
XLOC_034480	703.82	-0.636789	0.14738	-4.32072	1.55524e-05	0.000394289	AHSA2
XLOC_066230	243.594	-0.635432	0.23097	-2.75115	0.00593872	0.049874
XLOC_003891	1250.85	-0.634771	0.166669	-3.80857	0.000139773	0.00260142	ENPP7
XLOC_010390	745.459	-0.630876	0.148096	-4.25991	2.04508e-05	0.000502186	GABARAPL2
XLOC_010390	745.459	-0.630876	0.148096	-4.25991	2.04508e-05	0.000502186	ADAT1
XLOC_055552	292.133	-0.630558	0.180415	-3.49504	0.000473986	0.0070761	unknown
XLOC_064296	577.179	-0.6305	0.170695	-3.69371	0.000221003	0.00378761	Adat1
XLOC_025451	1461.4	-0.629475	0.130449	-4.82545	1.39685e-06	4.9136e-05	FAM102B
XLOC_002225	206.222	-0.629463	0.217991	-2.88757	0.00388234	0.0361099	Tmem138
XLOC_002225	206.222	-0.629463	0.217991	-2.88757	0.00388234	0.0361099	STRAP
XLOC_018615	348.71	-0.625582	0.171619	-3.64519	0.000267194	0.00442562	SLC25A13
XLOC_025635	276.073	-0.622234	0.173745	-3.58132	0.000341869	0.0054292
XLOC_067742	382.868	-0.620151	0.189842	-3.26666	0.00108824	0.0134968
XLOC_047409	3841.73	-0.620038	0.190425	-3.25607	0.00112966	0.0139246	DMD
XLOC_070622	513.767	-0.619872	0.198947	-3.11577	0.00183468	0.0203027
XLOC_063717	570.162	-0.618928	0.155588	-3.97799	6.95003e-05	0.00143493	unknown
XLOC_041534	807.784	-0.617862	0.140191	-4.40728	1.04675e-05	0.000281075	ZDHHC21
XLOC_036044	4887.63	-0.617777	0.111537	-5.53874	3.04657e-08	1.67745e-06	TCIRG1
XLOC_015953	1866.54	-0.617122	0.147041	-4.19692	2.70568e-05	0.000640374	PHAX
XLOC_067121	448.66	-0.616601	0.202115	-3.05074	0.00228281	0.024135	MTOR
XLOC_017586	997.187	-0.616424	0.218471	-2.82154	0.00477939	0.0420565	FGF8
XLOC_038634	205.968	-0.614877	0.214194	-2.87066	0.00409616	0.0376576
XLOC_068629	750.82	-0.613885	0.17625	-3.48304	0.000495752	0.00731504	unknown
XLOC_017783	1632.12	-0.613598	0.199433	-3.07672	0.00209295	0.0225096	ABLIM1
XLOC_029661	2675.64	-0.611703	0.138458	-4.41797	9.96319e-06	0.000269332	BDKRB1
XLOC_053215	2881.39	-0.611503	0.115005	-5.31718	1.0539e-07	5.0678e-06	MET
XLOC_003806	1042.63	-0.609845	0.135088	-4.51444	6.34847e-06	0.000180822	NUDCD2
XLOC_046842	822.028	-0.60753	0.157708	-3.85225	0.000117037	0.00223745	Ermp1
XLOC_034382	3337.84	-0.60714	0.111891	-5.42615	5.75821e-08	2.91442e-06	vps51
XLOC_034382	3337.84	-0.60714	0.111891	-5.42615	5.75821e-08	2.91442e-06	Ephx1
XLOC_011861	1108.69	-0.606855	0.124339	-4.88065	1.05737e-06	3.87948e-05	FRMD1
XLOC_058935	399.725	-0.604501	0.187916	-3.21687	0.00129598	0.0154369	Nfu1
XLOC_038120	9344.41	-0.604276	0.106105	-5.69507	1.23323e-08	7.33079e-07	npm1
XLOC_018542	2102.39	-0.603823	0.16917	-3.56934	0.000357886	0.00565485	LSM5
XLOC_011715	6545.72	-0.600872	0.112907	-5.32185	1.02715e-07	4.958e-06	unknown
XLOC_054829	1182.38	-0.600841	0.138097	-4.35088	1.35594e-05	0.000352331
XLOC_034564	388.788	-0.600599	0.204215	-2.94102	0.00327134	0.0319316
XLOC_006517	2566.33	-0.59876	0.121848	-4.91401	8.92344e-07	3.33485e-05	SEMA5B
XLOC_006517	2566.33	-0.59876	0.121848	-4.91401	8.92344e-07	3.33485e-05	dirc2
XLOC_002130	529.211	-0.598289	0.204506	-2.92553	0.0034387	0.0330268	AKAP7
XLOC_048296	819.286	-0.598158	0.148887	-4.01752	5.8813e-05	0.00123974	Pam
XLOC_038507	320.345	-0.598004	0.180404	-3.3148	0.000917072	0.0117674
XLOC_020497	386.259	-0.596248	0.206772	-2.8836	0.00393162	0.0364856	NEURL1B
XLOC_020497	386.259	-0.596248	0.206772	-2.8836	0.00393162	0.0364856	NEURL1
XLOC_026340	954.673	-0.595454	0.180766	-3.29405	0.000987551	0.0125183	Bin1
XLOC_068766	1823.86	-0.595393	0.155825	-3.82092	0.000132955	0.00249099
XLOC_053213	506.811	-0.594766	0.205269	-2.89749	0.00376158	0.0352849	CPM
XLOC_008023	6823.13	-0.594609	0.122359	-4.85953	1.17664e-06	4.22884e-05
XLOC_006615	2263.62	-0.592455	0.12039	-4.92112	8.60516e-07	3.23336e-05	nup35
XLOC_037567	3719.89	-0.592161	0.108873	-5.43903	5.35729e-08	2.74607e-06	MSR1
XLOC_006895	6464.49	-0.592078	0.139833	-4.23417	2.29402e-05	0.000552971	Fzd7
XLOC_036918	457.328	-0.590979	0.167683	-3.52438	0.000424478	0.00647789	Nadk
XLOC_039438	980.845	-0.588875	0.186832	-3.15189	0.00162216	0.0184218	GPX4
XLOC_012881	3485.69	-0.58861	0.125138	-4.70369	2.55504e-06	8.29312e-05	hspa14
XLOC_034286	1843.12	-0.587938	0.130386	-4.5092	6.50714e-06	0.000184408	POLA2
XLOC_015979	2970.61	-0.587145	0.112678	-5.21084	1.87985e-07	8.38364e-06	Spg21
XLOC_017911	299.129	-0.585062	0.191812	-3.05018	0.00228703	0.0241589	HTT
XLOC_051690	559.918	-0.58456	0.160704	-3.6375	0.000275299	0.00453053	unknown
XLOC_023932	538.619	-0.584386	0.155951	-3.74723	0.000178797	0.00318047	unknown
XLOC_023932	538.619	-0.584386	0.155951	-3.74723	0.000178797	0.00318047	NUAK1
XLOC_020446	6248.29	-0.582813	0.131623	-4.42791	9.51528e-06	0.000257967	NHP2
XLOC_065363	376.958	-0.581936	0.179748	-3.23751	0.00120578	0.0146637
XLOC_026545	1108.77	-0.5815	0.151235	-3.84502	0.000120541	0.00229509
XLOC_009170	2243.82	-0.581318	0.134858	-4.31058	1.62824e-05	0.000408745	POLR2H
XLOC_030294	708.342	-0.580953	0.140235	-4.1427	3.43239e-05	0.000779925	FAM118B
XLOC_006598	10403.1	-0.580526	0.174217	-3.3322	0.000861631	0.0111996
XLOC_054471	946.054	-0.580088	0.185968	-3.11929	0.00181285	0.0201006	NLRP3
XLOC_013678	1886.6	-0.579357	0.114794	-5.04691	4.4902e-07	1.83661e-05	PDE6H
XLOC_013678	1886.6	-0.579357	0.114794	-5.04691	4.4902e-07	1.83661e-05	MAP2K3
XLOC_008189	2131.52	-0.579281	0.13548	-4.27576	1.90485e-05	0.000472286	unknown
XLOC_036850	3184.21	-0.578005	0.123887	-4.66557	3.07768e-06	9.66619e-05	Hes1
XLOC_056889	2216.71	-0.577814	0.191633	-3.01521	0.00256804	0.0264522
XLOC_003236	6444.79	-0.576691	0.154361	-3.73599	0.000186977	0.00329682	ccnd1
XLOC_064056	560.542	-0.575916	0.15525	-3.70962	0.000207572	0.00359243	med18
XLOC_000008	653.139	-0.575655	0.146335	-3.93382	8.36048e-05	0.00168413
XLOC_055116	568.835	-0.574945	0.150325	-3.82469	0.000130935	0.00245807	CERKL
XLOC_028520	2415.04	-0.57432	0.143237	-4.00958	6.08278e-05	0.00127743	HUS1
XLOC_009359	700.333	-0.573999	0.127708	-4.49462	6.96955e-06	0.000195543
XLOC_004972	723.957	-0.573816	0.158064	-3.63026	0.000283133	0.00464045	unknown
XLOC_066749	2815.1	-0.572553	0.147595	-3.87923	0.000104789	0.00204498	B3GNT3
XLOC_051488	1728.27	-0.570786	0.195496	-2.91968	0.00350392	0.0334817
XLOC_061308	1321.44	-0.570684	0.160833	-3.5483	0.00038773	0.00601827
XLOC_010315	440.598	-0.570104	0.171015	-3.33364	0.000857166	0.0111622	Mettl17
XLOC_066687	327.618	-0.569955	0.168928	-3.37395	0.000740979	0.0100201
XLOC_060327	1069.23	-0.569101	0.153339	-3.71138	0.000206129	0.00357404
XLOC_039509	4200.52	-0.56883	0.121676	-4.67495	2.94025e-06	9.33879e-05	Ror1
XLOC_039509	4200.52	-0.56883	0.121676	-4.67495	2.94025e-06	9.33879e-05	JAK2
XLOC_009505	3997.54	-0.567883	0.121502	-4.67384	2.95616e-06	9.34711e-05
XLOC_049759	946.846	-0.565999	0.149893	-3.77603	0.00015935	0.00288377
XLOC_058061	524.104	-0.565896	0.17792	-3.18062	0.00146959	0.0170118	Setd4
XLOC_016873	573.538	-0.564253	0.192979	-2.92391	0.00345669	0.0331543	ARHGAP8
XLOC_018600	570.246	-0.56348	0.171535	-3.28492	0.00102011	0.0128155	Uncharacterized
XLOC_049159	10211	-0.562388	0.183751	-3.0606	0.00220893	0.0235104	IVNS1ABP
XLOC_027052	1601.79	-0.561598	0.13312	-4.21874	2.45674e-05	0.00058611	zgc63572
XLOC_027052	1601.79	-0.561598	0.13312	-4.21874	2.45674e-05	0.00058611	SCLT1
XLOC_012858	4159.43	-0.560867	0.102332	-5.48085	4.23286e-08	2.24325e-06	Tmpo
XLOC_012858	4159.43	-0.560867	0.102332	-5.48085	4.23286e-08	2.24325e-06	Slc6a8
XLOC_012858	4159.43	-0.560867	0.102332	-5.48085	4.23286e-08	2.24325e-06	LAMB2
XLOC_012858	4159.43	-0.560867	0.102332	-5.48085	4.23286e-08	2.24325e-06	LAMB1
XLOC_042646	1255.37	-0.56077	0.153871	-3.64441	0.000268004	0.0044338	PHF13
XLOC_028007	2767.89	-0.559751	0.123844	-4.5198	6.18979e-06	0.000178105	Rrp9
XLOC_011676	1464.62	-0.559015	0.148639	-3.7609	0.000169306	0.00303855	timm50
XLOC_058257	386.297	-0.558521	0.202971	-2.75172	0.00592827	0.0498141	unknown
XLOC_016877	1547.54	-0.557525	0.14669	-3.8007	0.000144289	0.00266258	SSBP1
XLOC_040237	447.563	-0.555336	0.192006	-2.89228	0.00382454	0.0357088
XLOC_010307	1933.21	-0.555122	0.11673	-4.75563	1.97833e-06	6.65138e-05	ngdn-b
XLOC_013692	9040.97	-0.554413	0.138407	-4.00567	6.18417e-05	0.00129486	nhp2l1
XLOC_030946	724.984	-0.553526	0.151733	-3.64803	0.000264259	0.00438991	ADAM10
XLOC_014954	3444.41	-0.552507	0.153853	-3.59114	0.000329233	0.00526118	STOX2
XLOC_014954	3444.41	-0.552507	0.153853	-3.59114	0.000329233	0.00526118	STOX1
XLOC_021429	6558.87	-0.55119	0.138823	-3.97044	7.17387e-05	0.00147358	Knop1
XLOC_056070	894.281	-0.550275	0.164215	-3.35095	0.000805352	0.0106601
XLOC_047749	935.661	-0.550229	0.140687	-3.911	9.19133e-05	0.00183312	tnr3
XLOC_003703	11336.4	-0.550061	0.111162	-4.94827	7.48778e-07	2.85133e-05	MYCN
XLOC_002110	1478.47	-0.549709	0.126944	-4.33031	1.48899e-05	0.000380579
XLOC_008236	12737.9	-0.548007	0.10959	-5.00051	5.71784e-07	2.27268e-05	Rnf111
XLOC_008236	12737.9	-0.548007	0.10959	-5.00051	5.71784e-07	2.27268e-05	CCNB2
XLOC_017553	1236.55	-0.54746	0.152535	-3.58907	0.000331859	0.00529413	fam136a
XLOC_038868	1375.41	-0.546415	0.177759	-3.07391	0.00211272	0.022675
XLOC_032367	929.099	-0.545427	0.161587	-3.37545	0.000736957	0.00997533	DNAJA1
XLOC_009268	1475.37	-0.545303	0.129146	-4.22239	2.41721e-05	0.000577933
XLOC_054927	685.718	-0.544694	0.185291	-2.93966	0.00328567	0.0320382	C1orf109
XLOC_046800	3293.77	-0.54453	0.128362	-4.24215	2.21385e-05	0.000537531
XLOC_025616	1898.31	-0.54414	0.125725	-4.32801	1.50461e-05	0.000383525	ZMYND19
XLOC_003607	832.903	-0.543884	0.192746	-2.82177	0.0047759	0.0420565
XLOC_031151	2878.12	-0.54131	0.115808	-4.67421	2.95084e-06	9.3408e-05	ctdspl2-a
XLOC_052998	941.448	-0.540528	0.173474	-3.1159	0.00183382	0.0203012
XLOC_000403	905.002	-0.539785	0.152707	-3.53477	0.000408131	0.00627607	unknown
XLOC_012737	4059.48	-0.538844	0.114024	-4.72573	2.29295e-06	7.52926e-05
XLOC_033354	845.767	-0.53714	0.139363	-3.85424	0.000116088	0.00222403
XLOC_013575	971.829	-0.534249	0.153743	-3.47495	0.00051094	0.00748483	MRPL53
XLOC_050617	1004.79	-0.53407	0.166329	-3.21092	0.00132311	0.0156905	unknown
XLOC_044801	1012.01	-0.533357	0.186475	-2.8602	0.00423373	0.0385446	Ccnh
XLOC_009164	5328.52	-0.532352	0.11031	-4.82595	1.39339e-06	4.90755e-05	Noc2l
XLOC_050765	790.68	-0.531786	0.144728	-3.67437	0.000238434	0.00401848	ndufaf7
XLOC_003719	903.262	-0.53153	0.158553	-3.35239	0.000801175	0.0106098	Fam195a
XLOC_017542	390.122	-0.530927	0.180241	-2.94565	0.00322275	0.0315888	Lsm11
XLOC_017617	3516.35	-0.530309	0.118411	-4.47852	7.51606e-06	0.000208179	Lyar
XLOC_027304	351.803	-0.530158	0.169519	-3.12743	0.00176342	0.0197079	unknown
XLOC_027304	351.803	-0.530158	0.169519	-3.12743	0.00176342	0.0197079	Tmem144
XLOC_034507	6485.11	-0.530004	0.114965	-4.61011	4.02451e-06	0.000122233	eif3k
XLOC_027794	1561.73	-0.529941	0.111779	-4.74098	2.12683e-06	7.03303e-05	ASL
XLOC_070276	399.093	-0.529499	0.182522	-2.90102	0.00371947	0.0349598
XLOC_017800	627.475	-0.527829	0.150946	-3.4968	0.000470868	0.00704075	AP5S1
XLOC_034262	1093.96	-0.527727	0.131174	-4.02311	5.74352e-05	0.00121343	Rpusd2
XLOC_017754	1231.96	-0.527196	0.144567	-3.64671	0.000265621	0.00440733	arl3
XLOC_066561	695.752	-0.526707	0.166982	-3.15427	0.00160901	0.0183094	MTX3
XLOC_009548	3692.06	-0.524631	0.125822	-4.16962	3.05103e-05	0.000706658	C1qbp
XLOC_060283	6323.38	-0.524498	0.124309	-4.21932	2.45043e-05	0.000585377	Wdr43
XLOC_003919	2466.57	-0.524054	0.150844	-3.47415	0.000512483	0.0075035	PHF5A
XLOC_007890	2331.84	-0.523639	0.156917	-3.33704	0.000846746	0.0110708	scamp5-b
XLOC_027073	324.925	-0.523282	0.174546	-2.99796	0.00271795	0.0276022	TPRXL
XLOC_027073	324.925	-0.523282	0.174546	-2.99796	0.00271795	0.0276022	FOLR1
XLOC_013686	5874.82	-0.521437	0.1181	-4.41522	1.00906e-05	0.000272253	MBTD1
XLOC_017554	3450.02	-0.521415	0.153639	-3.39376	0.000689393	0.0094653	SNRPG
XLOC_034231	1443.56	-0.521263	0.173512	-3.00419	0.00266285	0.0271701	ITPKC
XLOC_034231	1443.56	-0.521263	0.173512	-3.00419	0.00266285	0.0271701	Itpka
XLOC_026294	2519.48	-0.520821	0.149175	-3.49133	0.000480613	0.00713717
XLOC_032394	777.169	-0.520415	0.158588	-3.28156	0.00103234	0.0129346	Rprd1a
XLOC_001993	429.714	-0.520298	0.186298	-2.79283	0.00522498	0.0452977
XLOC_024789	1962.23	-0.519609	0.12753	-4.07442	4.6129e-05	0.00100473	TRMT13
XLOC_003337	2769.35	-0.518127	0.11179	-4.6348	3.57278e-06	0.000110122	DDX47
XLOC_005166	1386.48	-0.517192	0.176255	-2.93434	0.00334262	0.0324249	UPF0538
XLOC_033037	1274.12	-0.516527	0.130534	-3.95704	7.58848e-05	0.00154969	odf2
XLOC_031801	455.182	-0.514942	0.165814	-3.10555	0.00189927	0.0207939
XLOC_009204	2033.39	-0.513861	0.117317	-4.38011	1.18621e-05	0.000313144	MRPL50
XLOC_065209	1166.54	-0.511031	0.161131	-3.17152	0.00151641	0.0174676
XLOC_002042	1501.57	-0.510818	0.144158	-3.54346	0.000394912	0.00609278	Cytochrome
XLOC_014921	2435.61	-0.508456	0.150854	-3.37052	0.000750267	0.0101069	unknown
XLOC_014921	2435.61	-0.508456	0.150854	-3.37052	0.000750267	0.0101069	CISD1
XLOC_011495	3348.29	-0.507446	0.122339	-4.14787	3.35581e-05	0.000764663	Esf1
XLOC_018778	3101.51	-0.507387	0.113443	-4.47262	7.72687e-06	0.000212974	rarga
XLOC_057587	2967.13	-0.506399	0.127514	-3.97131	7.14786e-05	0.00147038	ROMO1
XLOC_046786	444.978	-0.506077	0.178877	-2.82919	0.00466653	0.0413478	ITGB1BP1
XLOC_024846	706.281	-0.504457	0.139066	-3.62747	0.000286208	0.00467995	mtg1
XLOC_043723	4674.29	-0.502654	0.109998	-4.56967	4.88504e-06	0.000145164	L7rn6
XLOC_003578	746.92	-0.502558	0.146327	-3.4345	0.000593651	0.00842458	nubp1
XLOC_034260	1217.04	-0.502297	0.151451	-3.31656	0.000911316	0.0117155	Tfb2m
XLOC_057274	8429.61	-0.501171	0.153983	-3.25472	0.00113503	0.0139663	RPL34
XLOC_040051	2259.74	-0.501094	0.134091	-3.73697	0.000186248	0.00328808	mrps24-a
XLOC_036178	1328.61	-0.498971	0.114693	-4.3505	1.35828e-05	0.000352615	unknown
XLOC_036178	1328.61	-0.498971	0.114693	-4.3505	1.35828e-05	0.000352615	Tmem199
XLOC_047430	1208.04	-0.498891	0.124241	-4.01553	5.93126e-05	0.0012484	ATM
XLOC_068624	15952.8	-0.498423	0.108047	-4.61303	3.96841e-06	0.00012073	HNRNPK
XLOC_066335	694.907	-0.497689	0.148113	-3.36019	0.000778892	0.010393	EZH2
XLOC_000080	1757.3	-0.496892	0.110026	-4.51613	6.29814e-06	0.000179935	Fbxo43
XLOC_006457	2081.56	-0.496803	0.170077	-2.92104	0.00348863	0.0333469	PFKP
XLOC_051491	491.842	-0.496633	0.175628	-2.82775	0.00468769	0.0414582	unknown
XLOC_044707	815.368	-0.496088	0.144455	-3.43421	0.00059429	0.00842541	RGMA
XLOC_035039	2273.5	-0.495991	0.113657	-4.36392	1.27749e-05	0.00033473	RAI1
XLOC_000075	38962.7	-0.494959	0.134293	-3.68567	0.0002281	0.00387618	RPL7
XLOC_000078	949.427	-0.494343	0.156765	-3.1534	0.00161381	0.0183491	RPL7
XLOC_003744	747.303	-0.493842	0.134656	-3.66742	0.000245006	0.00410889	KCNJ4
XLOC_014847	15726.1	-0.493723	0.117937	-4.18634	2.83484e-05	0.000664239	Nolc1
XLOC_062681	870.523	-0.492832	0.139555	-3.53146	0.000413265	0.00633425	RGS16
XLOC_012794	941.187	-0.492392	0.149333	-3.29727	0.000976282	0.0123978	NXT2
XLOC_064961	960.299	-0.492129	0.131832	-3.73299	0.00018922	0.00333011
XLOC_050488	21711.9	-0.491318	0.144266	-3.40564	0.000660095	0.00916416	rpl9
XLOC_057052	834.597	-0.488721	0.171119	-2.85603	0.00428971	0.0388907	ZNHIT3
XLOC_037456	2087.01	-0.487776	0.129905	-3.75486	0.000173439	0.00309719
XLOC_012885	2268.52	-0.486743	0.11939	-4.07693	4.56349e-05	0.000995512	Timm17b
XLOC_003330	904.488	-0.486426	0.140811	-3.45447	0.000551373	0.00792046	ELP3
XLOC_016795	2537.05	-0.486331	0.161943	-3.00311	0.00267239	0.0272348	ZDHHC17
XLOC_013684	22166.1	-0.485564	0.127671	-3.80324	0.000142816	0.00264407	sumo3
XLOC_042694	1263.32	-0.485518	0.156797	-3.09647	0.00195837	0.0213606	unknown
XLOC_042694	1263.32	-0.485518	0.156797	-3.09647	0.00195837	0.0213606	Mrpl20
XLOC_000094	1628.16	-0.484082	0.149807	-3.23136	0.00123202	0.0148799	Macf1
XLOC_030933	6641.41	-0.483823	0.131881	-3.66865	0.000243839	0.0040942	RPS27L
XLOC_012913	1093.56	-0.483454	0.15296	-3.16065	0.00157418	0.0179785	GTF3C6
XLOC_023293	4093.61	-0.482973	0.121338	-3.9804	6.88006e-05	0.00142362	scocb
XLOC_000468	547.49	-0.482323	0.141032	-3.41996	0.000626303	0.00876678	Uncharacterized
XLOC_001737	1721.35	-0.481767	0.12534	-3.84368	0.000121204	0.00230616	EXTL3
XLOC_034420	2023.98	-0.480508	0.110535	-4.34712	1.37935e-05	0.000357095	prepl
XLOC_034420	2023.98	-0.480508	0.110535	-4.34712	1.37935e-05	0.000357095	PPM1B
XLOC_034420	2023.98	-0.480508	0.110535	-4.34712	1.37935e-05	0.000357095	AKAP6
XLOC_039333	4637.17	-0.4795	0.165621	-2.89517	0.00378949	0.0354639	midn-a
XLOC_039333	4637.17	-0.4795	0.165621	-2.89517	0.00378949	0.0354639	Midn
XLOC_027270	656.257	-0.479143	0.132419	-3.61837	0.00029646	0.00482457	Neil3
XLOC_045061	547.034	-0.478315	0.173078	-2.76357	0.00571722	0.0484839	infB
XLOC_040692	7570.05	-0.47772	0.11754	-4.06433	4.81714e-05	0.00103961	E2F4
XLOC_040692	7570.05	-0.47772	0.11754	-4.06433	4.81714e-05	0.00103961	e2f4
XLOC_018796	5348.61	-0.476561	0.108246	-4.40259	1.06966e-05	0.000286134	CLASP1
XLOC_005416	3025.51	-0.475887	0.122213	-3.89391	9.86419e-05	0.00194662	wdr12
XLOC_005416	3025.51	-0.475887	0.122213	-3.89391	9.86419e-05	0.00194662	CNBD2
XLOC_040110	2299.77	-0.474627	0.128339	-3.69822	0.000217116	0.00373236	unknown
XLOC_016637	6492.21	-0.474593	0.123002	-3.85842	0.000114124	0.0021937	IPO7
XLOC_005018	7705.13	-0.474468	0.0977598	-4.8534	1.21361e-06	4.35058e-05	Abcf2
XLOC_006501	670.357	-0.474413	0.135869	-3.4917	0.00047995	0.00713109	Fam126b
XLOC_011517	1955.07	-0.473437	0.120746	-3.92094	8.82057e-05	0.00176795	SUPT7L
XLOC_011517	1955.07	-0.473437	0.120746	-3.92094	8.82057e-05	0.00176795	MLH3
XLOC_006589	2300.59	-0.47299	0.102754	-4.60313	4.16182e-06	0.000126069	elp2
XLOC_037608	6743.05	-0.472818	0.128894	-3.66829	0.000244182	0.00409752	PUM1
XLOC_053963	344.648	-0.472631	0.165005	-2.86435	0.00417865	0.0382038	GSTK1
XLOC_035893	7626.66	-0.472488	0.114978	-4.10936	3.96755e-05	0.00087914	mybbp1a
XLOC_056947	1558.81	-0.472259	0.164827	-2.86518	0.0041677	0.0381409
XLOC_019672	21465.3	-0.47144	0.159242	-2.96053	0.00307114	0.0304206	rpl11
XLOC_000084	1504.73	-0.470223	0.128243	-3.66667	0.000245733	0.00411863	unknown
XLOC_025682	1432.11	-0.470114	0.127438	-3.68897	0.000225164	0.00384021	RABGGTB
XLOC_033537	624.091	-0.470054	0.160104	-2.93592	0.00332562	0.0323157	gtdc1
XLOC_033537	624.091	-0.470054	0.160104	-2.93592	0.00332562	0.0323157	ARHGAP15
XLOC_002068	1679.1	-0.469233	0.139276	-3.36908	0.000754199	0.0101453	FDFT1
XLOC_055966	2023.49	-0.469199	0.167744	-2.79711	0.00515619	0.0448255	ZNF837
XLOC_055966	2023.49	-0.469199	0.167744	-2.79711	0.00515619	0.0448255	Zbed4
XLOC_055966	2023.49	-0.469199	0.167744	-2.79711	0.00515619	0.0448255	unknown
XLOC_055966	2023.49	-0.469199	0.167744	-2.79711	0.00515619	0.0448255	tig
XLOC_026268	993.581	-0.466863	0.146157	-3.19424	0.00140198	0.0163873	SRP14
XLOC_020642	4995.84	-0.466722	0.125357	-3.72314	0.000196759	0.00343699	PPARGC1A
XLOC_011783	3523.3	-0.465829	0.124536	-3.74051	0.000183644	0.00325026	AHSA1
XLOC_057585	1398.01	-0.465798	0.162954	-2.85846	0.00425707	0.038682	IQCC
XLOC_017467	959.858	-0.464993	0.146763	-3.16831	0.00153326	0.0176256	LSM1
XLOC_017842	577.466	-0.464412	0.153781	-3.01995	0.00252813	0.0261079	TRMT44
XLOC_020613	30822.2	-0.464273	0.121912	-3.80826	0.00013995	0.00260299	SUFU
XLOC_020613	30822.2	-0.464273	0.121912	-3.80826	0.00013995	0.00260299	npm1
XLOC_020613	30822.2	-0.464273	0.121912	-3.80826	0.00013995	0.00260299	FGF8
XLOC_020613	30822.2	-0.464273	0.121912	-3.80826	0.00013995	0.00260299	FBXW4
XLOC_053815	3119.41	-0.463659	0.106229	-4.3647	1.27295e-05	0.000333851	WDR74
XLOC_053815	3119.41	-0.463659	0.106229	-4.3647	1.27295e-05	0.000333851	KIF6
XLOC_007892	1327.34	-0.463431	0.162684	-2.84865	0.00439048	0.0395147	LSM6
XLOC_070967	1174.54	-0.463206	0.152076	-3.04589	0.00231995	0.0244608
XLOC_000482	3772.07	-0.463025	0.12182	-3.80088	0.000144184	0.00266258	NCOA1
XLOC_000482	3772.07	-0.463025	0.12182	-3.80088	0.000144184	0.00266258	infB
XLOC_013587	5605.23	-0.462596	0.103091	-4.48724	7.21526e-06	0.000200835	RPL7L1
XLOC_006592	2766.92	-0.461805	0.12829	-3.5997	0.00031858	0.00511833	coq10b
XLOC_008033	3824.44	-0.461132	0.0992056	-4.64825	3.34763e-06	0.000103751	Pias1
XLOC_045089	2558.14	-0.460912	0.12536	-3.67671	0.000236259	0.0039911	dbr1
XLOC_062052	1129.97	-0.460537	0.142721	-3.22684	0.00125166	0.0150579
XLOC_035932	2896.7	-0.459944	0.144152	-3.19068	0.00141937	0.0165393	SMARCB1
XLOC_000461	410.455	-0.459596	0.165984	-2.76891	0.00562439	0.0479359	TBC1D7
XLOC_040023	1779.07	-0.459203	0.134372	-3.4174	0.000632234	0.00883402	Chchd1
XLOC_063453	529.878	-0.458944	0.151875	-3.02185	0.00251239	0.0259644
XLOC_052093	1326.71	-0.458543	0.162195	-2.8271	0.0046971	0.0415141	unknown
XLOC_052093	1326.71	-0.458543	0.162195	-2.8271	0.0046971	0.0415141	DMBT1
XLOC_062549	971.553	-0.458334	0.156556	-2.92761	0.00341577	0.0328852	hspa8
XLOC_063248	495.058	-0.458099	0.161725	-2.83258	0.00461734	0.0410283
XLOC_047451	5514.46	-0.458006	0.122861	-3.72783	0.000193137	0.00338634	Map7
XLOC_027081	603.636	-0.458002	0.142925	-3.2045	0.00135298	0.0159771	MMAA
XLOC_018621	7635.75	-0.456835	0.10513	-4.34544	1.38994e-05	0.000359177	PFKM
XLOC_057756	1791.56	-0.456728	0.155354	-2.93992	0.00328294	0.0320226	unknown
XLOC_057756	1791.56	-0.456728	0.155354	-2.93992	0.00328294	0.0320226	POLR1C
XLOC_050994	117467	-0.456621	0.112059	-4.07483	4.60471e-05	0.00100373	ncl
XLOC_009206	2177.45	-0.455802	0.136093	-3.34921	0.000810437	0.010704	Ggt1
XLOC_003781	4176.9	-0.454543	0.144678	-3.14175	0.00167939	0.0189646	ube2s
XLOC_034418	722.718	-0.454062	0.136971	-3.31502	0.000916361	0.0117643	camkmt
XLOC_003342	1173.48	-0.45377	0.139525	-3.25225	0.00114494	0.0140465	unknown
XLOC_020622	1466.66	-0.453603	0.144116	-3.14748	0.00164682	0.0186567	PBDC1
XLOC_020622	1466.66	-0.453603	0.144116	-3.14748	0.00164682	0.0186567	OAT
XLOC_027305	1074.71	-0.453207	0.121663	-3.7251	0.000195234	0.00341885	AFF3
XLOC_006766	2290.4	-0.453126	0.11993	-3.77827	0.000157923	0.00286348	nt5c3
XLOC_060455	685.826	-0.453116	0.144764	-3.13003	0.00174789	0.0195654	unknown
XLOC_068816	472.636	-0.452998	0.159557	-2.83909	0.00452424	0.0403943
XLOC_004954	2043.44	-0.45293	0.126328	-3.58534	0.000336642	0.00536435	raraa
XLOC_027109	1228.97	-0.452841	0.135067	-3.35271	0.000800231	0.0106073	unknown
XLOC_027109	1228.97	-0.452841	0.135067	-3.35271	0.000800231	0.0106073	FBXW7
XLOC_016831	1694.74	-0.452795	0.123023	-3.68059	0.000232699	0.00394007	E2F7
XLOC_018658	492.789	-0.451613	0.156765	-2.88083	0.00396635	0.0367041	CROT
XLOC_070230	1408.89	-0.451494	0.130165	-3.46864	0.000523102	0.00760363
XLOC_016838	5912.86	-0.450504	0.114426	-3.93707	8.24809e-05	0.00166506	Opn1sw
XLOC_016838	5912.86	-0.450504	0.114426	-3.93707	8.24809e-05	0.00166506	Nat10
XLOC_040724	1051.2	-0.449246	0.13458	-3.33812	0.000843461	0.0110502	UPF0547
XLOC_028572	1595.36	-0.448715	0.132797	-3.37895	0.000727644	0.00988255	C1GALT1
XLOC_016840	877.599	-0.448462	0.147477	-3.0409	0.00235869	0.0247303	tmem41b
XLOC_006770	1790.24	-0.448337	0.139623	-3.21105	0.0013225	0.0156899	Myg1
XLOC_006770	1790.24	-0.448337	0.139623	-3.21105	0.0013225	0.0156899	lrrc3b
XLOC_006770	1790.24	-0.448337	0.139623	-3.21105	0.0013225	0.0156899	C12orf10
XLOC_001714	2961.36	-0.448295	0.127546	-3.51476	0.000440149	0.00667361
XLOC_029692	1031.52	-0.447827	0.136245	-3.28693	0.00101286	0.0127416	Mrpl14
XLOC_029438	1194.2	-0.447346	0.128101	-3.49213	0.000479185	0.00712724	Pole2
XLOC_003489	1267.59	-0.44707	0.149199	-2.99648	0.00273119	0.0277267	Mettl22
XLOC_034504	503.975	-0.446646	0.157857	-2.82943	0.00466312	0.0413361
XLOC_030926	8232.35	-0.446207	0.12648	-3.52789	0.000418882	0.00640987	2003-03-01
XLOC_020554	2467.67	-0.444497	0.151845	-2.92731	0.00341903	0.032892	Akr1b1
XLOC_000434	2143.57	-0.444373	0.160392	-2.77055	0.00559614	0.0477794	UQCRB
XLOC_029680	1334.41	-0.442416	0.160812	-2.75113	0.00593895	0.049874	unknown
XLOC_029680	1334.41	-0.442416	0.160812	-2.75113	0.00593895	0.049874	KIAA1109
XLOC_002203	36520.4	-0.442391	0.09202	-4.80755	1.52791e-06	5.2757e-05	prmt1
XLOC_069431	1247.4	-0.442368	0.148843	-2.97204	0.00295831	0.0295946
XLOC_033569	6713.45	-0.442206	0.116089	-3.80918	0.000139428	0.00259671
XLOC_006453	1063.9	-0.442043	0.124329	-3.55544	0.000377344	0.00588302	Snf8
XLOC_035946	1802.33	-0.441929	0.144492	-3.0585	0.00222445	0.0236309	DDX52
XLOC_035946	1802.33	-0.441929	0.144492	-3.0585	0.00222445	0.0236309	Ddx52
XLOC_018747	701.914	-0.441917	0.153277	-2.88312	0.00393755	0.0365162	Mmtag2
XLOC_009383	2106.71	-0.441777	0.11708	-3.77331	0.000161095	0.00290975	mRpS16
XLOC_003507	9572.29	-0.441256	0.131006	-3.36821	0.000756567	0.0101577	EIF3F
XLOC_003613	4077.71	-0.440499	0.150183	-2.93309	0.00335609	0.0325108	Mdm2
XLOC_018717	611.643	-0.440316	0.151012	-2.91576	0.00354821	0.0337902	SEC22A
XLOC_012639	1269.22	-0.440283	0.1236	-3.56217	0.000367809	0.00576951	poc1a
XLOC_036179	1304.19	-0.440147	0.13181	-3.33926	0.00084001	0.0110152	RNF26
XLOC_000616	1097.61	-0.439747	0.146438	-3.00296	0.0026737	0.0272348
XLOC_011547	832.885	-0.439522	0.141082	-3.11537	0.00183715	0.0203195	ATP5J
XLOC_003723	3282.72	-0.439228	0.121834	-3.60514	0.00031198	0.00503119	Map2k6
XLOC_003723	3282.72	-0.439228	0.121834	-3.60514	0.00031198	0.00503119	KCNJ12
XLOC_033774	2213.25	-0.439107	0.106531	-4.12189	3.75778e-05	0.000840602	TMUB2
XLOC_015743	1541.02	-0.438971	0.124829	-3.51658	0.000437149	0.00663528	Ier3ip1
XLOC_005446	15272.9	-0.438946	0.102912	-4.26528	1.99656e-05	0.000492852	CBX1a
XLOC_018513	27162.3	-0.438771	0.100894	-4.34884	1.36862e-05	0.000354953	Pa2g4
XLOC_018513	27162.3	-0.438771	0.100894	-4.34884	1.36862e-05	0.000354953	GLS
XLOC_017466	1989.27	-0.438756	0.140762	-3.11701	0.00182698	0.0202334	Polr1e
XLOC_029426	718.611	-0.438289	0.147898	-2.96346	0.00304204	0.0301961	sidkey-22a1.3
XLOC_005302	5819.89	-0.437349	0.121553	-3.598	0.000320673	0.00514485	zc3h15
XLOC_030949	2121.53	-0.436549	0.104337	-4.18401	2.86412e-05	0.000670543	TMED7
XLOC_006760	816.206	-0.43623	0.13682	-3.18834	0.0014309	0.0166393	MALSU1
XLOC_006635	1622.42	-0.435318	0.135643	-3.20928	0.00133066	0.0157668	dbf4
XLOC_040052	7048.17	-0.435295	0.106916	-4.07138	4.67359e-05	0.00101559	RRP12
XLOC_040052	7048.17	-0.435295	0.106916	-4.07138	4.67359e-05	0.00101559	Rrp12
XLOC_018486	815.154	-0.435261	0.157925	-2.75612	0.00584922	0.0493355	GTPBP10
XLOC_018486	815.154	-0.435261	0.157925	-2.75612	0.00584922	0.0493355	gtpbp10
XLOC_042685	1603.92	-0.434833	0.12726	-3.41688	0.000633434	0.00884639	PXYLP1
XLOC_019752	1075.91	-0.434618	0.124896	-3.47985	0.000501692	0.00737238	UBE2W
XLOC_060573	3709.21	-0.434459	0.134659	-3.22637	0.00125371	0.0150579
XLOC_012667	695.669	-0.434092	0.14268	-3.04242	0.00234681	0.02467	Tmem60
XLOC_055859	8894.53	-0.43168	0.122533	-3.52296	0.000426759	0.00650562	LARP4
XLOC_013709	1426.77	-0.431131	0.151359	-2.8484	0.00439397	0.0395176	unknown
XLOC_013709	1426.77	-0.431131	0.151359	-2.8484	0.00439397	0.0395176	CA10
XLOC_005257	1136.58	-0.431107	0.140043	-3.07839	0.00208124	0.0224142	unknown
XLOC_051024	18704.9	-0.430774	0.131315	-3.28045	0.00103641	0.0129625	Eif4g3
XLOC_029384	4976.32	-0.430655	0.109557	-3.9309	8.46298e-05	0.00170355	Slc29a2
XLOC_016851	1568.76	-0.4303	0.14853	-2.89706	0.00376682	0.0353222	suv420h1-a
XLOC_013438	883.516	-0.430184	0.125175	-3.43665	0.000588946	0.00836624	MIF4GD
XLOC_043721	2116.33	-0.430112	0.146155	-2.94284	0.00325219	0.0318109	Tiam1
XLOC_003581	1900.2	-0.429923	0.122847	-3.49965	0.000465869	0.00698084	NCDN
XLOC_028571	4820.88	-0.429691	0.103738	-4.14209	3.44156e-05	0.000781041	wdr75
XLOC_046313	7478.8	-0.429644	0.0987996	-4.34864	1.36981e-05	0.000354953	NAP1L1
XLOC_026292	1206.89	-0.429575	0.121588	-3.53304	0.000410812	0.00630695	rad51-b
XLOC_050823	2519.36	-0.429114	0.135308	-3.17138	0.00151715	0.017469	Angel2
XLOC_017669	1707.77	-0.428928	0.141887	-3.02302	0.00250262	0.0259111	unknown
XLOC_032240	747.292	-0.428589	0.133024	-3.22189	0.00127348	0.0152174	FARS2
XLOC_029366	3573.14	-0.428474	0.115128	-3.72171	0.000197881	0.0034523	MAX
XLOC_037942	3158.48	-0.428473	0.1327	-3.22889	0.00124273	0.0149643	WDR89
XLOC_000414	4104.47	-0.427888	0.126	-3.39593	0.000683963	0.00943038	Gmnn
XLOC_029400	2880.1	-0.426564	0.123918	-3.44231	0.000576766	0.00823061	unknown
XLOC_046890	1309.87	-0.424923	0.145408	-2.92228	0.00347483	0.0332829
XLOC_014751	2087.85	-0.424872	0.148036	-2.87007	0.00410386	0.0377161	Dna2
XLOC_021659	4352.85	-0.423842	0.131502	-3.22309	0.00126817	0.0151668	METRN
XLOC_009230	34254.5	-0.423831	0.15275	-2.77467	0.00552576	0.0472789	RPLP0
XLOC_068152	1199.31	-0.42292	0.127589	-3.31469	0.00091744	0.0117674
XLOC_024092	1265.32	-0.422911	0.120772	-3.50174	0.000462235	0.00693377	unknown
XLOC_024092	1265.32	-0.422911	0.120772	-3.50174	0.000462235	0.00693377	Srrm1
XLOC_011422	1096.59	-0.422876	0.147075	-2.87525	0.00403714	0.0372264	Ddx28
XLOC_039997	1335.17	-0.422517	0.1334	-3.16728	0.0015387	0.0176449	TADA2A
XLOC_006899	2175.1	-0.422442	0.13504	-3.12827	0.0017584	0.0196596	tarbp2
XLOC_004441	1290.56	-0.422239	0.144929	-2.91342	0.00357497	0.0339783
XLOC_023091	2080.29	-0.422089	0.129878	-3.24989	0.0011545	0.0141279	FAM199X
XLOC_018666	1811.96	-0.421217	0.132962	-3.16794	0.00153523	0.0176266	LRP2
XLOC_018666	1811.96	-0.421217	0.132962	-3.16794	0.00153523	0.0176266	aarsd1-b
XLOC_020621	4133.67	-0.419387	0.106414	-3.94108	8.11142e-05	0.00163982	unknown
XLOC_020621	4133.67	-0.419387	0.106414	-3.94108	8.11142e-05	0.00163982	CDC25A
XLOC_035988	1195.18	-0.419359	0.121146	-3.4616	0.000536972	0.00774919
XLOC_044713	1155.84	-0.419176	0.114563	-3.65891	0.000253286	0.00422759	efna5b
XLOC_010576	3992.3	-0.418441	0.108268	-3.86486	0.000111155	0.00215018	NUDT21
XLOC_037472	1951.45	-0.417817	0.113198	-3.69102	0.000223356	0.00381863	CFDP2
XLOC_027035	4159.25	-0.416905	0.10738	-3.88251	0.000103383	0.0020231	EXOSC8
XLOC_027237	7962.12	-0.416803	0.111344	-3.74339	0.000181557	0.00321941	Uncharacterized
XLOC_006781	1005.57	-0.416413	0.143119	-2.90956	0.00361942	0.0342828
XLOC_068307	1617.93	-0.416388	0.144819	-2.87523	0.00403735	0.0372264
XLOC_010312	2020.93	-0.415207	0.120192	-3.45453	0.000551255	0.00792046	unknown
XLOC_003291	14626.6	-0.415012	0.11682	-3.55258	0.000381468	0.00593416	CAD
XLOC_042228	983.642	-0.413608	0.132767	-3.11529	0.00183764	0.0203195	Ccdc88c
XLOC_005178	757.846	-0.412956	0.137252	-3.00874	0.00262332	0.026923
XLOC_063251	751.342	-0.412846	0.132887	-3.10675	0.00189154	0.0207281
XLOC_017592	7019.57	-0.411677	0.0966331	-4.26021	2.04238e-05	0.000501961	xpo7-a
XLOC_017592	7019.57	-0.411677	0.0966331	-4.26021	2.04238e-05	0.000501961	XPO7
XLOC_017592	7019.57	-0.411677	0.0966331	-4.26021	2.04238e-05	0.000501961	TLX1
XLOC_017592	7019.57	-0.411677	0.0966331	-4.26021	2.04238e-05	0.000501961	pi4k2a
XLOC_017592	7019.57	-0.411677	0.0966331	-4.26021	2.04238e-05	0.000501961	Paip2b
XLOC_005165	661.891	-0.411563	0.148848	-2.76498	0.00569257	0.0483302	UPF0538
XLOC_005165	661.891	-0.411563	0.148848	-2.76498	0.00569257	0.0483302	Steap2
XLOC_009250	972.539	-0.410854	0.134296	-3.05933	0.00221835	0.0235839	spin
XLOC_030927	1459.87	-0.410642	0.125446	-3.27346	0.00106241	0.0132114	RGMA
XLOC_017737	2225.75	-0.410157	0.122225	-3.35575	0.000791491	0.0105063	Arid5b
XLOC_021510	1082.12	-0.410028	0.125039	-3.2792	0.00104104	0.0129972	Dnaja3
XLOC_008395	12665.7	-0.409869	0.0996952	-4.11122	3.93567e-05	0.000873453	Dnmt3b
XLOC_060725	1950.03	-0.409622	0.141696	-2.89086	0.00384194	0.0358356
XLOC_057244	1787.16	-0.409597	0.12569	-3.25878	0.00111891	0.0138052	Ptrh2
XLOC_013952	692.497	-0.409293	0.133115	-3.07474	0.00210687	0.0226302	bbs5
XLOC_027211	2039.02	-0.408836	0.137809	-2.96669	0.00301021	0.029933	SMAD1
XLOC_018559	2050.18	-0.408574	0.142875	-2.85966	0.00424096	0.0385855	Mrpl10
XLOC_053826	3860.33	-0.408212	0.119804	-3.40733	0.000656009	0.00912543	BRAFLDRAFT_123918
XLOC_053826	3860.33	-0.408212	0.119804	-3.40733	0.000656009	0.00912543	Bdh1
XLOC_065294	1510.03	-0.40684	0.125994	-3.22905	0.00124204	0.0149643	FAM120C
XLOC_010267	1045.2	-0.406448	0.137636	-2.95307	0.00314633	0.0309908	EMC8
XLOC_038867	84931.3	-0.406051	0.116953	-3.47192	0.000516758	0.00754257	HEXBP
XLOC_035862	8644.04	-0.405816	0.138635	-2.92723	0.00341999	0.032892	rpl-12
XLOC_022358	1194.76	-0.405699	0.123381	-3.28819	0.00100833	0.0127073	LARS2
XLOC_053605	1588.37	-0.405527	0.138217	-2.93398	0.00334645	0.0324397	RBM34
XLOC_066200	1288.12	-0.405486	0.146266	-2.77225	0.00556705	0.0475599
XLOC_030415	8895.83	-0.405473	0.120257	-3.37174	0.00074696	0.0100697	NAA50
XLOC_005281	774.122	-0.404818	0.145883	-2.77495	0.00552098	0.0472668	SUOX
XLOC_060165	6561.05	-0.404315	0.105196	-3.84345	0.000121316	0.00230673	SRRT
XLOC_005417	2223.84	-0.404119	0.122267	-3.30523	0.000948983	0.0121223	RNF113A
XLOC_005417	2223.84	-0.404119	0.122267	-3.30523	0.000948983	0.0121223	CNBD2
XLOC_005417	2223.84	-0.404119	0.122267	-3.30523	0.000948983	0.0121223	aad-a
XLOC_000565	2086.7	-0.403686	0.137658	-2.93253	0.00336216	0.0325584
XLOC_011413	4692.36	-0.403339	0.12413	-3.24933	0.00115677	0.0141472	G2E3
XLOC_035957	5401.57	-0.403313	0.100106	-4.02885	5.60502e-05	0.00118863	tsr1
XLOC_011822	172426	-0.403272	0.122526	-3.29131	0.000997236	0.0126014	HSP90AA1
XLOC_000415	874.708	-0.40276	0.144204	-2.79298	0.00522244	0.0452896	Acot13
XLOC_024023	996.416	-0.402487	0.133829	-3.00748	0.00263427	0.0270059
XLOC_039992	1282.62	-0.402126	0.128664	-3.12539	0.00177569	0.01979	unknown
XLOC_039992	1282.62	-0.402126	0.128664	-3.12539	0.00177569	0.01979	TRYP7
XLOC_039992	1282.62	-0.402126	0.128664	-3.12539	0.00177569	0.01979	SLC25A11
XLOC_032377	1955.21	-0.402029	0.129113	-3.11379	0.00184703	0.0203833
XLOC_031071	760.911	-0.401377	0.136506	-2.94037	0.0032782	0.0319874	PTCD2
XLOC_003786	31063.2	-0.400206	0.137288	-2.91508	0.00355599	0.0338274	RPS7
XLOC_003304	1931.81	-0.399031	0.126201	-3.16186	0.00156766	0.0179113	nfxl1
XLOC_006986	2811.52	-0.39862	0.128166	-3.1102	0.00186964	0.0205579	Rif1
XLOC_006986	2811.52	-0.39862	0.128166	-3.1102	0.00186964	0.0205579	Cisd3
XLOC_009325	1232.46	-0.398176	0.126253	-3.15378	0.00161168	0.0183324	VDAC2
XLOC_018547	1650.74	-0.397951	0.128833	-3.08889	0.00200903	0.0217865	Kcnh8
XLOC_018547	1650.74	-0.397951	0.128833	-3.08889	0.00200903	0.0217865	Cdk2
XLOC_016849	1180.08	-0.397375	0.121127	-3.28065	0.0010357	0.0129593	tollip-a
XLOC_016849	1180.08	-0.397375	0.121127	-3.28065	0.0010357	0.0129593	Ppp6r1
XLOC_008020	1377.34	-0.396988	0.118372	-3.35374	0.000797281	0.0105732	AK6
XLOC_024064	1904.59	-0.396636	0.123706	-3.20627	0.00134468	0.0158995	impdh1b
XLOC_024064	1904.59	-0.396636	0.123706	-3.20627	0.00134468	0.0158995	impdh1a
XLOC_024064	1904.59	-0.396636	0.123706	-3.20627	0.00134468	0.0158995	IMPDH1
XLOC_021640	12361	-0.396591	0.10418	-3.80678	0.00014079	0.00261171	RSL1D1
XLOC_020467	1006.4	-0.396385	0.127445	-3.11025	0.00186927	0.0205579	afap1l1
XLOC_056763	2950.28	-0.39619	0.106428	-3.7226	0.000197184	0.00344228	Deptor
XLOC_064813	4973.08	-0.396074	0.132299	-2.99378	0.00275544	0.0279024
XLOC_017618	2146.56	-0.395525	0.10181	-3.88492	0.000102363	0.00200738	ZNF383
XLOC_021635	1411.01	-0.393724	0.129835	-3.03249	0.00242543	0.02527	FOPNL
XLOC_003532	6166.32	-0.393666	0.141199	-2.78802	0.00530321	0.0458065	nop10
XLOC_041634	3500.48	-0.393456	0.114361	-3.44046	0.000580723	0.0082703	NDUFS8
XLOC_051794	2935.93	-0.393436	0.11833	-3.32491	0.000884471	0.0114436	llph
XLOC_051794	2935.93	-0.393436	0.11833	-3.32491	0.000884471	0.0114436	fbxl5
XLOC_031130	1859.44	-0.391665	0.111416	-3.51534	0.000439184	0.00666257	SSR2
XLOC_030254	11560.2	-0.391422	0.106163	-3.68698	0.000226932	0.00386101	PPP2R1A
XLOC_014048	3734.59	-0.391237	0.122194	-3.20177	0.00136587	0.0160622	smdt1
XLOC_014048	3734.59	-0.391237	0.122194	-3.20177	0.00136587	0.0160622	NDUFA6
XLOC_033585	4300.04	-0.39098	0.116099	-3.36765	0.000758123	0.0101737	CDCA7L
XLOC_024009	1162.07	-0.390867	0.130793	-2.98845	0.00280399	0.0283228
XLOC_042688	918.744	-0.390718	0.134472	-2.90558	0.00366572	0.0346048	unknown
XLOC_006816	1540.82	-0.390301	0.12212	-3.19605	0.00139325	0.0163025	SLC4A10
XLOC_013929	5036.71	-0.389771	0.0942746	-4.13442	3.55849e-05	0.0008024	Hm13
XLOC_035035	1507.95	-0.389553	0.111892	-3.4815	0.000498622	0.00734472	nol12
XLOC_071421	7782.91	-0.389268	0.133821	-2.90888	0.00362727	0.0343054
XLOC_027114	3166.12	-0.38913	0.126862	-3.06735	0.00215966	0.0230979	RAB33B
XLOC_027114	3166.12	-0.38913	0.126862	-3.06735	0.00215966	0.0230979	PLRG1
XLOC_024845	3218.95	-0.3884	0.102355	-3.79462	0.000147872	0.00271269	Kdm4b
XLOC_010600	901.337	-0.388235	0.139927	-2.77455	0.00552775	0.0472816	Protein
XLOC_004932	1900.87	-0.386998	0.136267	-2.83999	0.00451146	0.0403466	unknown
XLOC_010608	1906.85	-0.386023	0.113082	-3.41365	0.000640977	0.00893842	aktip
XLOC_038711	4662.05	-0.385732	0.111772	-3.45107	0.00055837	0.00798024	gnl3
XLOC_026217	2153.67	-0.385488	0.115313	-3.34298	0.000828827	0.0108889	Syne1
XLOC_011596	1043.51	-0.385442	0.127544	-3.02203	0.00251085	0.0259581	unknown
XLOC_045719	2845.82	-0.385341	0.124645	-3.09152	0.00199135	0.0216365	CYYR1
XLOC_003746	1556.16	-0.385153	0.132922	-2.89758	0.00376049	0.0352849	MRPL22
XLOC_024914	3918.91	-0.384306	0.098463	-3.90305	9.49891e-05	0.00188511	ZNHIT6
XLOC_024914	3918.91	-0.384306	0.098463	-3.90305	9.49891e-05	0.00188511	Rcl1
XLOC_002064	15140.4	-0.384016	0.122363	-3.13834	0.00169908	0.0191384	PABPC4
XLOC_033764	12057.1	-0.383222	0.10311	-3.71664	0.000201888	0.0035135	ATIC
XLOC_017557	1154.58	-0.383159	0.126316	-3.03332	0.00241876	0.0252191	RALBP1
XLOC_027266	64173.5	-0.382786	0.135452	-2.82598	0.00471365	0.0416106	HMGB2
XLOC_027266	64173.5	-0.382786	0.135452	-2.82598	0.00471365	0.0416106	Galnt7
XLOC_027220	1115.95	-0.382598	0.136232	-2.80843	0.00497844	0.0435566	USP38
XLOC_027220	1115.95	-0.382598	0.136232	-2.80843	0.00497844	0.0435566	SMARCA5
XLOC_047422	1048.1	-0.382353	0.132792	-2.87933	0.00398517	0.0368177	unknown
XLOC_029470	2049.6	-0.382297	0.116139	-3.29173	0.000995735	0.0125937	CDCA4
XLOC_010458	13005	-0.382054	0.109018	-3.5045	0.000457462	0.00687684	Sf3b3
XLOC_018660	2255.68	-0.381711	0.115755	-3.29758	0.000975233	0.0123901	Dnajc1
XLOC_018660	2255.68	-0.381711	0.115755	-3.29758	0.000975233	0.0123901	Armc3
XLOC_026395	12839.2	-0.381545	0.126003	-3.02807	0.00246123	0.0255577	PTK7
XLOC_055693	3376.63	-0.380983	0.116887	-3.25942	0.00111642	0.0137933
XLOC_028835	1352.48	-0.38084	0.1323	-2.87861	0.00399438	0.0368906	CCDC12
XLOC_044653	1886.83	-0.378605	0.136749	-2.76861	0.00562959	0.0479444	C9orf85
XLOC_013484	3154.08	-0.378005	0.114766	-3.29371	0.000988749	0.0125222	SMCR8
XLOC_048607	2136.79	-0.377873	0.114725	-3.29373	0.000988687	0.0125222	EIF4E2
XLOC_026444	7878.76	-0.377802	0.13692	-2.75929	0.00579267	0.0489671	Srsf5
XLOC_026444	7878.76	-0.377802	0.13692	-2.75929	0.00579267	0.0489671	Prkd3
XLOC_026444	7878.76	-0.377802	0.13692	-2.75929	0.00579267	0.0489671	Prkd2
XLOC_026444	7878.76	-0.377802	0.13692	-2.75929	0.00579267	0.0489671	Prkd1
XLOC_039502	1600.58	-0.377404	0.130147	-2.89983	0.00373366	0.035058	unknown
XLOC_028806	22352.3	-0.376658	0.115676	-3.25616	0.00112929	0.0139246	cbx1-gamma
XLOC_011718	5732.56	-0.376339	0.11081	-3.39627	0.000683117	0.00942334	REQ
XLOC_003709	1757.08	-0.375094	0.113107	-3.31627	0.000912278	0.0117226	MAL2
XLOC_040039	6878.38	-0.374801	0.110863	-3.38076	0.000722862	0.00983183	Hells
XLOC_000337	3325.94	-0.374797	0.113808	-3.29325	0.000990363	0.012537	FZD4
XLOC_006653	1633.47	-0.374728	0.109255	-3.42984	0.000603929	0.00852743	CNPPD1
XLOC_027317	2110.52	-0.373942	0.123621	-3.02491	0.00248707	0.025769	Phgr1
XLOC_027317	2110.52	-0.373942	0.123621	-3.02491	0.00248707	0.025769	KLF12
XLOC_032395	12263.5	-0.373288	0.122949	-3.03611	0.00239651	0.0250427	pabpn1-b
XLOC_032395	12263.5	-0.373288	0.122949	-3.03611	0.00239651	0.0250427	Eif2s2
XLOC_031215	8725.26	-0.373272	0.122726	-3.04151	0.00235393	0.0247155	Sin3a
XLOC_064533	784.957	-0.372975	0.132536	-2.81415	0.00489067	0.0428882	DDX49
XLOC_013567	9956.56	-0.372698	0.116725	-3.19297	0.0014082	0.0164295	EIF3E
XLOC_033686	732.393	-0.37259	0.128714	-2.89472	0.003795	0.0354919	Ubr3
XLOC_051199	16705.8	-0.370845	0.113472	-3.26816	0.00108249	0.0134373	EIF3D
XLOC_019713	2208.3	-0.370739	0.126994	-2.91935	0.00350763	0.0335059	TMEM214
XLOC_019713	2208.3	-0.370739	0.126994	-2.91935	0.00350763	0.0335059	ST6GAL1
XLOC_019713	2208.3	-0.370739	0.126994	-2.91935	0.00350763	0.0335059	nkain3
XLOC_012857	3026.83	-0.369953	0.122031	-3.03163	0.00243235	0.0253326	Slc6a8
XLOC_033732	1598.21	-0.369551	0.133155	-2.77534	0.0055144	0.0472336	Nrp2
XLOC_036710	4241.02	-0.369034	0.0940593	-3.92342	8.7301e-05	0.00175106	Tmed7
XLOC_027256	2604.01	-0.369015	0.111613	-3.30622	0.000945652	0.0120852	polr1d
XLOC_058173	1004.52	-0.368633	0.125063	-2.94756	0.00320288	0.0314159	unknown
XLOC_017802	4211.78	-0.368353	0.122805	-2.99948	0.00270438	0.0274743	GPAM
XLOC_000586	6218.81	-0.368317	0.132582	-2.77804	0.00546876	0.0469339	irs1
XLOC_036073	797.185	-0.367746	0.133608	-2.75242	0.00591567	0.0497736	mnmG
XLOC_011826	1060.13	-0.367441	0.129444	-2.83861	0.00453104	0.0404402	Pex6
XLOC_028762	9515.05	-0.367146	0.0983221	-3.73412	0.000188375	0.00331731	Nop58
XLOC_018566	5379.35	-0.367051	0.122734	-2.99061	0.00278423	0.0281534	Slc4a10
XLOC_013581	2403.13	-0.366797	0.11915	-3.07846	0.00208076	0.0224142	ext1a
XLOC_013581	2403.13	-0.366797	0.11915	-3.07846	0.00208076	0.0224142	Ext1
XLOC_018783	3890.69	-0.366614	0.110239	-3.32563	0.000882196	0.0114194	FZD2
XLOC_059193	75276.3	-0.365797	0.124458	-2.93911	0.00329155	0.0320591	rpl5-a
XLOC_059193	75276.3	-0.365797	0.124458	-2.93911	0.00329155	0.0320591	RPL5
XLOC_059193	75276.3	-0.365797	0.124458	-2.93911	0.00329155	0.0320591	MRPS2
XLOC_042621	1300.67	-0.365782	0.122652	-2.98228	0.00286108	0.0288166	GPS2
XLOC_003215	2351.23	-0.364964	0.116246	-3.13958	0.00169192	0.0190754	unknown
XLOC_003215	2351.23	-0.364964	0.116246	-3.13958	0.00169192	0.0190754	PKNOX2
XLOC_028497	18843.2	-0.364132	0.0999005	-3.64495	0.000267449	0.00442722	PSME3
XLOC_033734	2462.8	-0.363947	0.11876	-3.06455	0.00217995	0.023256	CUL2
XLOC_010364	799.877	-0.363822	0.127722	-2.84856	0.00439175	0.0395147	HSPA5
XLOC_034522	8245.8	-0.36289	0.110609	-3.28085	0.00103495	0.0129558	SNRPD2
XLOC_008387	1243.6	-0.362675	0.130101	-2.78764	0.00530931	0.0458451	POLRMT
XLOC_008387	1243.6	-0.362675	0.130101	-2.78764	0.00530931	0.0458451	Polrmt
XLOC_003339	3809.17	-0.362189	0.116492	-3.10913	0.00187642	0.0206026	unknown
XLOC_006439	3142.85	-0.361497	0.105267	-3.4341	0.000594532	0.00842541	NAB2
XLOC_006439	3142.85	-0.361497	0.105267	-3.4341	0.000594532	0.00842541	Nab1
XLOC_002215	1496.08	-0.361108	0.124403	-2.90274	0.00369918	0.0348118	Dispanin
XLOC_022419	8827.05	-0.360615	0.0947232	-3.80704	0.000140641	0.00261171	unknown
XLOC_022419	8827.05	-0.360615	0.0947232	-3.80704	0.000140641	0.00261171	RBM39
XLOC_035364	4963.56	-0.360526	0.0973666	-3.70277	0.000213262	0.00367733	UTP6
XLOC_035364	4963.56	-0.360526	0.0973666	-3.70277	0.000213262	0.00367733	DAK
XLOC_018543	5007.33	-0.359066	0.129736	-2.76768	0.00564575	0.0480427	Larp4b
XLOC_018543	5007.33	-0.359066	0.129736	-2.76768	0.00564575	0.0480427	Adarb1
XLOC_061854	2787.9	-0.35892	0.124964	-2.87217	0.00407659	0.0375145	HPDL
XLOC_033752	5289.1	-0.35892	0.0988935	-3.62935	0.000284132	0.0046541	Ola1
XLOC_033752	5289.1	-0.35892	0.0988935	-3.62935	0.000284132	0.0046541	ola1
XLOC_035124	2662.03	-0.358661	0.120893	-2.96676	0.0030096	0.029933	grwd1
XLOC_027831	1407.5	-0.358631	0.128831	-2.78373	0.00537385	0.0462605	pus7l
XLOC_033592	780.385	-0.357675	0.124455	-2.87393	0.00405404	0.0373436	znf830
XLOC_055639	7499.62	-0.357528	0.0968086	-3.69314	0.000221501	0.00379382	POLR2E
XLOC_018827	1058.19	-0.356809	0.126105	-2.82945	0.0046628	0.0413361	unknown
XLOC_023278	39058.8	-0.35661	0.118594	-3.00698	0.00263859	0.0270294	HMGB1
XLOC_068213	2552.82	-0.356526	0.123518	-2.88643	0.00389644	0.0362239
XLOC_002289	2748.54	-0.356518	0.10648	-3.3482	0.000813381	0.0107311	Mob2
XLOC_055011	13554.1	-0.356081	0.113568	-3.13539	0.00171627	0.0192882	Eif4b
XLOC_009137	3763.61	-0.355839	0.102916	-3.45757	0.000545062	0.00784985	WDR46
XLOC_006502	892.098	-0.355691	0.129019	-2.7569	0.00583526	0.0492532	unknown
XLOC_006502	892.098	-0.355691	0.129019	-2.7569	0.00583526	0.0492532	Ndufb3
XLOC_005310	2235.68	-0.355629	0.119398	-2.97851	0.00289651	0.0291109	TMEM194A
XLOC_040140	1355.75	-0.355238	0.124009	-2.86462	0.00417508	0.0381836	tmem173
XLOC_040140	1355.75	-0.355238	0.124009	-2.86462	0.00417508	0.0381836	Tm2d1
XLOC_062885	1713.42	-0.354577	0.119665	-2.96309	0.00304565	0.0302213
XLOC_003199	1731.22	-0.353014	0.111537	-3.16498	0.00155092	0.017756	RCJMB04_11e11
XLOC_052936	1164.75	-0.352814	0.127716	-2.7625	0.00573607	0.0485762
XLOC_014764	2224.51	-0.352701	0.119576	-2.9496	0.00318185	0.0312532	PURA
XLOC_003717	5236.84	-0.352503	0.108077	-3.2616	0.00110786	0.013722	pomc
XLOC_026453	4771.73	-0.352456	0.12066	-2.92106	0.00348841	0.0333469	sae1
XLOC_008432	1183.56	-0.351998	0.117493	-2.99592	0.00273617	0.0277572	VPS45
XLOC_007999	5703.62	-0.351839	0.126045	-2.79138	0.00524844	0.045473	MBD2
XLOC_003538	5619.84	-0.351152	0.120763	-2.90779	0.00363996	0.0343963	GNL2
XLOC_006867	1841.44	-0.351063	0.120409	-2.91558	0.0035503	0.0337987	USP37
XLOC_013687	3752.29	-0.350849	0.104586	-3.35463	0.000794714	0.0105441	Utp18
XLOC_003184	2429.27	-0.348747	0.11594	-3.00801	0.00262967	0.0269685	MCPH1
XLOC_003184	2429.27	-0.348747	0.11594	-3.00801	0.00262967	0.0269685	HBS1L
XLOC_005124	1586.67	-0.348465	0.112967	-3.08466	0.00203783	0.0220394	Mtx2
XLOC_031882	2142.22	-0.347373	0.121337	-2.86288	0.00419804	0.0383103	unknown
XLOC_040877	1140.69	-0.347096	0.117512	-2.9537	0.00313993	0.0309387	RBCK1
XLOC_023986	3805.64	-0.347057	0.109731	-3.16281	0.00156256	0.0178676	NAA10
XLOC_040081	12265	-0.345397	0.110268	-3.13235	0.00173414	0.0194373	EIF4E
XLOC_036080	31740	-0.345352	0.117785	-2.93205	0.00336735	0.0325862	RAN
XLOC_034578	2106	-0.345157	0.119586	-2.88626	0.00389844	0.0362305	Nsl1
XLOC_029393	1857.05	-0.344945	0.113294	-3.04469	0.0023292	0.0245307	CCDC97
XLOC_016821	2331.36	-0.3445	0.111334	-3.09429	0.00197286	0.0214786	ACCS
XLOC_040921	6390.34	-0.344493	0.108128	-3.18597	0.00144269	0.0167569	Circumsporozoite
XLOC_040921	6390.34	-0.344493	0.108128	-3.18597	0.00144269	0.0167569	BOP1
XLOC_019753	7628.48	-0.344252	0.0953049	-3.61211	0.000303714	0.00491761	TCEB1
XLOC_021653	4378.69	-0.34335	0.11717	-2.93035	0.0033858	0.0326636	Nol11
XLOC_006572	12851.8	-0.341787	0.119363	-2.86342	0.00419096	0.038279	Rbm45
XLOC_000410	6822.84	-0.34067	0.0945036	-3.60483	0.000312354	0.00503433	ZNF706
XLOC_042689	1939.07	-0.340466	0.118226	-2.87979	0.00397937	0.0367762	Pik3cd
XLOC_036761	18098.4	-0.340416	0.0986196	-3.45181	0.000556847	0.00796283	Tdg
XLOC_036011	3632.89	-0.340176	0.113608	-2.99429	0.0027508	0.0278755	CLP1
XLOC_058967	23781	-0.339442	0.101892	-3.33139	0.000864125	0.0112217	EIF4A2
XLOC_022304	2699.75	-0.339288	0.118022	-2.87478	0.00404303	0.0372666	MBTPS1
XLOC_008340	43752.9	-0.338116	0.118958	-2.84231	0.00447885	0.0401144	unknown
XLOC_008340	43752.9	-0.338116	0.118958	-2.84231	0.00447885	0.0401144	Itga11
XLOC_008340	43752.9	-0.338116	0.118958	-2.84231	0.00447885	0.0401144	ANP32B
XLOC_059152	3505.26	-0.33792	0.10817	-3.12396	0.00178433	0.0198548
XLOC_009467	15033	-0.33788	0.110394	-3.06069	0.00220831	0.0235104	ppp1cc-a
XLOC_039558	6615.16	-0.337212	0.110222	-3.05939	0.00221787	0.0235839	CARM1
XLOC_035063	2701.66	-0.336411	0.11788	-2.85385	0.00431928	0.0390581	GID4
XLOC_040904	2445.92	-0.336347	0.113872	-2.95372	0.00313967	0.0309387	fam83d-a
XLOC_040904	2445.92	-0.336347	0.113872	-2.95372	0.00313967	0.0309387	fam83d
XLOC_008290	1776.02	-0.336039	0.119805	-2.80488	0.00503359	0.0439362	WDR83
XLOC_017477	4758.51	-0.335651	0.105946	-3.16813	0.00153423	0.0176266	SRP72
XLOC_017477	4758.51	-0.335651	0.105946	-3.16813	0.00153423	0.0176266	smim19
XLOC_034434	9712.47	-0.335632	0.0893853	-3.75489	0.000173415	0.00309719	MTA1
XLOC_009375	37515.7	-0.33478	0.0941951	-3.55411	0.000379256	0.005903	FUBP3
XLOC_009375	37515.7	-0.33478	0.0941951	-3.55411	0.000379256	0.005903	Fubp1
XLOC_060294	2005.2	-0.333677	0.110651	-3.01557	0.00256501	0.0264305	isyna1-a
XLOC_058579	1539.29	-0.333484	0.116792	-2.85538	0.00429855	0.0389458	CSRP1
XLOC_008081	4464.09	-0.332949	0.120336	-2.76682	0.00566057	0.0481396	unknown
XLOC_008081	4464.09	-0.332949	0.120336	-2.76682	0.00566057	0.0481396	UBE2Q2
XLOC_012905	1495.84	-0.332186	0.113064	-2.93802	0.00330311	0.0321414	RFT1
XLOC_003644	9846.94	-0.331811	0.104232	-3.18339	0.0014556	0.0168807	VNN2
XLOC_003644	9846.94	-0.331811	0.104232	-3.18339	0.0014556	0.0168807	Rpa2
XLOC_038857	5116.37	-0.331767	0.0979626	-3.38668	0.00070745	0.00965956	unknown
XLOC_038857	5116.37	-0.331767	0.0979626	-3.38668	0.00070745	0.00965956	PIM1
XLOC_041560	11704	-0.33076	0.11697	-2.82774	0.00468782	0.0414582	magoh
XLOC_033152	10834.3	-0.329768	0.110688	-2.97924	0.00288962	0.0290605	unknown
[truncated: 68 more rows]

## Sheet: DESeq2_T21vT20_upregulated
Supplementary data 1: Results of DESeq2 analyses comparing T18, T20 and T21 DNT RNA-seq datasets.
[truncated: 2,459 more rows]

[truncated: 2 more sheets: DESeq2_T20vT18_downregulated, DESeq2_T20vT18_upregulated]
