# Supplementary material for: A genome-wide assessment of the ancestral neural crest gene regulatory network
Source: Nat Commun. 2019 Oct 16;10:4689. doi: 10.1038/s41467-019-12687-4 (PMC6795873; doi:10.1038/s41467-019-12687-4)
Supplement: Supplementary file 5 — Supplementary Dataset 4 [file 41467_2019_12687_MOESM5_ESM.xlsx]

## Sheet:  co-binding analysis
Supplementary data 4: Results of DESeq2 analyses for selected TFs used in silico two-way combinatorial TF analysis.
XLOC	baseMean	log2FoldChange	lfcSE	stat	pvalue	padj	geneID	homer motif name
XLOC_021434	2053.07	5.09331	0.446275	11.413	3.60273e-30	2.5986e-28	SOX10	sox10
XLOC_016695	425.757	0.652967	0.193068	3.38206	0.000719451	0.00489542	TEAD4	TEAD4
XLOC_063192	439.713	1.92365	0.249965	7.69568	1.40742e-14	3.83732e-13	Tfap2a	AP2-alpha
XLOC_005123	1213.67	0.901395	0.154291	5.84218	5.15233e-09	8.21877e-08	hox-alpha2	HOXA2
XLOC_043642	23.2885	4.09075	0.568287	7.19838	6.09315e-13	1.46416e-11	RFX6	Rfx5
XLOC_006769	2527.37	1.90556	0.188533	10.1073	5.12824e-24	2.61153e-22	KLF6	EKLF
XLOC_040186	871.082	4.93908	0.501354	9.8515	6.75289e-23	3.26173e-21	PAX5	PAX5
XLOC_029663	255.297	2.40814	0.252098	9.55237	1.2676e-21	5.65411e-20	SIX1	Six1
XLOC_020661	124.453	3.99918	0.310118	12.8956	4.76292e-38	4.85672e-36	EBF3	EBF
XLOC_027069	111.125	6.59767	0.450135	14.6571	1.21364e-48	1.84324e-46	POU4F2	Pit1+1bp
XLOC_003893	6.37989	2.60559	0.667924	3.90103	9.57846e-05	0.000795432	ETS1	Ets1-distal
XLOC_054376	70.7964	1.24092	0.302473	4.10257	4.08585e-05	0.000365529	pbx1	Pbx3
XLOC_031111	1731.13	1.80887	0.112435	16.0881	3.08951e-58	6.40673e-56	SMAD6	Smad2
XLOC_055725	307.102	7.04649	0.37327	18.8777	1.73931e-79	6.46737e-77	PRDM12	PRDM14
XLOC_022288	192.775	0.638531	0.171961	3.71324	0.000204622	0.00158997	BCL2L2	Bcl6
XLOC_000043	223.946	0.967818	0.17608	5.49645	3.87505e-08	5.49089e-07	GRHL2	GRHL2
XLOC_002262	24.1041	2.29916	0.466215	4.93156	8.15774e-07	9.62176e-06	e2f8	E2F6
XLOC_012680	149.682	2.58114	0.387297	6.6645	2.66e-11	5.43e-10	HGF	REST-NRSF
